# Supplementary material for: Collective Behaviour without Collective Order in Wild Swarms of Midges
Source: PLoS Comput Biol. 2014 Jul 24;10(7):e1003697. doi: 10.1371/journal.pcbi.1003697 (PMC4109845; doi:10.1371/journal.pcbi.1003697)
Supplement: Datafile S1 — refers to a swarm of Chironomidae, Cladotanytarsus atridorsum. Data from this file were used to produce the panels in the first two rows of the left column of Fig. 3. (DAT) [file pcbi.1003697.s001.dat]

#for each pair of midges in the swarm, their mutual distance and the scalar product between their
#dimensionless velocity fluctuations (see Eq.1 in the main text) are reported.
#first column: distances in meters
#second column: scalar products, dimensionless
#data are sorted from the shortest to the largest distance
7.619339e-03 7.903070e-04
8.076645e-03 2.858361e-03
8.394820e-03 -2.653931e-03
9.048349e-03 -1.739134e-03
9.179355e-03 -9.636957e-04
1.015197e-02 -1.115115e-03
1.085869e-02 2.659862e-05
1.147081e-02 -2.653098e-04
1.147245e-02 7.568286e-04
1.165976e-02 2.153666e-04
1.205082e-02 2.423820e-03
1.242380e-02 3.071548e-03
1.270136e-02 -1.831281e-04
1.286998e-02 -2.726381e-06
1.317790e-02 -6.610309e-04
1.456619e-02 1.603221e-03
1.463102e-02 -2.069947e-03
1.463102e-02 -2.069947e-03
1.474082e-02 3.252947e-03
1.476849e-02 -1.683492e-03
1.506097e-02 2.022213e-03
1.517813e-02 4.844421e-04
1.521864e-02 1.290606e-04
1.535139e-02 3.945025e-03
1.536659e-02 3.904782e-04
1.538081e-02 1.187997e-02
1.556590e-02 -1.809261e-03
1.560833e-02 -2.441249e-03
1.560916e-02 2.558359e-03
1.570859e-02 2.205687e-03
1.575941e-02 -4.713847e-04
1.579020e-02 -2.193408e-03
1.610172e-02 1.967135e-03
1.614497e-02 1.626188e-03
1.626860e-02 3.024089e-03
1.657260e-02 8.884692e-04
1.695018e-02 2.406749e-03
1.700183e-02 7.083711e-04
1.707659e-02 1.261565e-04
1.711928e-02 -2.770550e-04
1.746973e-02 1.551231e-03
1.756933e-02 2.595684e-03
1.758269e-02 8.092971e-04
1.764604e-02 -5.459196e-05
1.795446e-02 4.152712e-03
1.885451e-02 1.372988e-03
1.915606e-02 1.668680e-03
1.926866e-02 7.072019e-04
1.927065e-02 2.745573e-03
1.970770e-02 -1.151301e-03
1.975250e-02 3.299736e-03
1.984194e-02 2.006677e-03
1.986926e-02 2.366763e-03
1.986993e-02 3.475836e-03
1.993735e-02 -1.265046e-03
1.993909e-02 -2.861790e-03
1.996124e-02 1.546548e-03
2.007780e-02 -6.035133e-05
2.008201e-02 -2.107610e-03
2.018146e-02 1.453819e-03
2.026927e-02 1.891082e-03
2.027707e-02 -1.430173e-03
2.032774e-02 4.960936e-03
2.050328e-02 -1.004922e-04
2.057020e-02 -7.614898e-04
2.076418e-02 -2.100422e-03
2.088262e-02 -8.238204e-04
2.102791e-02 1.060611e-03
2.135617e-02 6.575294e-03
2.139666e-02 8.066019e-04
2.148241e-02 -7.645919e-04
2.159263e-02 1.724872e-03
2.161939e-02 6.608318e-04
2.174927e-02 -1.686698e-03
2.175341e-02 -4.610140e-04
2.177170e-02 3.392265e-03
2.178858e-02 -1.865804e-03
2.179966e-02 -7.027781e-04
2.196474e-02 1.603022e-03
2.209872e-02 -6.781967e-04
2.233174e-02 3.927422e-03
2.247007e-02 1.626541e-03
2.253558e-02 2.769707e-03
2.261979e-02 5.914362e-03
2.266453e-02 4.346271e-04
2.268616e-02 4.066040e-04
2.288764e-02 2.383765e-03
2.309455e-02 3.333207e-03
2.334525e-02 -5.723805e-04
2.347291e-02 8.767003e-04
2.348864e-02 1.609864e-03
2.368531e-02 9.335939e-04
2.403118e-02 -3.990540e-03
2.413999e-02 8.436971e-04
2.438084e-02 -2.835384e-03
2.448936e-02 1.865853e-03
2.452516e-02 1.896765e-03
2.456724e-02 9.810930e-04
2.457145e-02 4.616556e-03
2.465593e-02 -1.100224e-04
2.471502e-02 -1.340893e-03
2.476685e-02 -3.851523e-04
2.491074e-02 -7.946276e-03
2.532884e-02 8.879470e-04
2.545535e-02 1.324673e-03
2.560006e-02 1.415234e-03
2.563228e-02 -4.167733e-05
2.564304e-02 -2.701970e-03
2.569900e-02 -1.079134e-03
2.572567e-02 2.786439e-03
2.591328e-02 2.352369e-03
2.599937e-02 -6.187452e-04
2.602957e-02 -1.369400e-04
2.610865e-02 1.939441e-03
2.625277e-02 7.655902e-04
2.630278e-02 -3.684836e-04
2.630746e-02 -3.971835e-04
2.669466e-02 -1.856181e-03
2.692112e-02 2.975025e-03
2.700770e-02 3.731201e-04
2.701514e-02 8.177035e-04
2.704827e-02 9.728395e-04
2.709881e-02 1.913105e-03
2.717008e-02 8.901379e-03
2.723413e-02 -3.628906e-03
2.727772e-02 5.498808e-03
2.728171e-02 2.265103e-03
2.731067e-02 1.381029e-03
2.733316e-02 -8.591200e-04
2.735614e-02 3.374246e-03
2.751201e-02 4.114838e-04
2.751390e-02 1.521674e-03
2.751480e-02 2.083374e-04
2.754760e-02 4.547306e-04
2.788981e-02 6.834116e-04
2.789143e-02 -4.379464e-04
2.802992e-02 -9.107485e-04
2.808941e-02 -1.037784e-03
2.812098e-02 5.675926e-03
2.812579e-02 4.121536e-03
2.816523e-02 7.275249e-04
2.823888e-02 -1.130162e-03
2.828179e-02 -6.951357e-05
2.828448e-02 -3.137300e-03
2.833553e-02 7.241594e-04
2.846383e-02 1.575253e-03
2.847270e-02 1.318988e-03
2.848399e-02 1.517063e-03
2.858422e-02 2.681323e-04
2.870546e-02 8.874786e-04
2.871548e-02 2.241372e-03
2.882108e-02 -1.043606e-03
2.894030e-02 9.186914e-04
2.894275e-02 1.164234e-03
2.897479e-02 2.225696e-04
2.900783e-02 -1.501946e-03
2.903913e-02 -1.709158e-03
2.910801e-02 -3.572697e-04
2.912597e-02 9.839348e-04
2.915145e-02 -2.983850e-03
2.918702e-02 4.784818e-03
2.923142e-02 -2.215496e-03
2.944762e-02 1.013549e-03
2.961812e-02 -2.052113e-03
2.993160e-02 -6.469707e-04
2.995565e-02 -1.681979e-03
3.000265e-02 4.843992e-03
3.007273e-02 -2.151688e-04
3.016566e-02 5.214209e-03
3.019176e-02 -6.228296e-04
3.022656e-02 5.481795e-03
3.024392e-02 -1.944827e-03
3.024609e-02 -2.076463e-03
3.034685e-02 1.543224e-03
3.036163e-02 1.399735e-03
3.037220e-02 -3.437099e-03
3.053976e-02 1.440538e-03
3.066919e-02 3.963681e-05
3.070804e-02 1.302442e-03
3.080897e-02 2.800133e-03
3.082987e-02 9.234335e-04
3.090581e-02 -9.147232e-04
3.093358e-02 -1.088563e-03
3.101619e-02 -8.592494e-04
3.104505e-02 1.108203e-03
3.105074e-02 -2.286422e-03
3.106669e-02 2.055721e-03
3.107472e-02 -2.963482e-03
3.112148e-02 -5.761267e-04
3.116112e-02 1.329660e-03
3.134076e-02 5.655994e-04
3.144288e-02 2.473577e-03
3.144288e-02 2.473577e-03
3.159837e-02 -3.174650e-03
3.160609e-02 2.553212e-03
3.165854e-02 -1.388452e-03
3.177614e-02 8.689633e-03
3.182926e-02 -6.641488e-06
3.189229e-02 -1.556627e-03
3.194426e-02 -5.939129e-04
3.199228e-02 -1.471941e-03
3.203922e-02 4.388034e-03
3.206756e-02 1.141269e-03
3.222593e-02 -7.469260e-04
3.223391e-02 4.163885e-03
3.224233e-02 -1.235921e-03
3.229553e-02 1.064106e-04
3.234155e-02 -4.151878e-04
3.236682e-02 5.085624e-03
3.237272e-02 -8.521118e-04
3.239972e-02 1.955265e-03
3.241714e-02 -1.459065e-03
3.241979e-02 5.745221e-04
3.243166e-02 -2.501815e-03
3.247558e-02 2.977459e-03
3.250564e-02 5.299741e-04
3.259549e-02 4.290856e-04
3.259704e-02 6.196967e-04
3.266577e-02 8.993193e-04
3.277161e-02 2.416124e-03
3.287561e-02 1.565641e-03
3.287808e-02 2.298927e-03
3.294344e-02 2.096465e-03
3.311177e-02 1.184906e-03
3.312794e-02 1.377150e-03
3.318186e-02 -3.903128e-04
3.320002e-02 4.867168e-04
3.331389e-02 -2.135562e-03
3.342321e-02 -2.906331e-03
3.350021e-02 -1.876844e-03
3.352378e-02 -1.916541e-03
3.354617e-02 4.937680e-03
3.361956e-02 5.152507e-03
3.365018e-02 8.311179e-04
3.367601e-02 2.214411e-03
3.368589e-02 2.134378e-03
3.380158e-02 6.196348e-03
3.380158e-02 6.196348e-03
3.391967e-02 1.518744e-03
3.393447e-02 -2.265151e-03
3.396362e-02 -1.564513e-03
3.405023e-02 4.184916e-03
3.408708e-02 1.735482e-03
3.410772e-02 -4.871847e-04
3.421567e-02 5.483840e-03
3.428210e-02 -6.897372e-04
3.436967e-02 -1.612316e-03
3.446156e-02 -4.884881e-04
3.449450e-02 -3.953612e-03
3.451045e-02 -1.397819e-03
3.451045e-02 -1.397819e-03
3.453562e-02 -8.342359e-04
3.454144e-02 2.210608e-03
3.456093e-02 -2.609807e-03
3.456144e-02 1.203087e-03
3.465762e-02 2.415031e-03
3.466603e-02 1.566742e-03
3.467688e-02 -1.216315e-03
3.468865e-02 1.403479e-03
3.472972e-02 -2.417053e-03
3.484438e-02 6.408143e-04
3.484908e-02 -3.211291e-04
3.503322e-02 1.034171e-03
3.504603e-02 1.027158e-02
3.506299e-02 3.764925e-04
3.506883e-02 -1.210908e-03
3.508261e-02 2.784321e-03
3.511540e-02 -7.274539e-04
3.520299e-02 1.933652e-03
3.521651e-02 -1.364873e-03
3.530208e-02 2.625032e-03
3.533005e-02 7.524201e-04
3.536291e-02 6.038169e-04
3.547970e-02 -6.985089e-04
3.554012e-02 2.400532e-03
3.559604e-02 -1.436331e-03
3.563927e-02 1.386013e-03
3.567935e-02 2.374525e-03
3.581303e-02 2.275583e-03
3.597642e-02 7.002559e-04
3.603447e-02 4.381937e-03
3.612022e-02 5.898191e-03
3.612296e-02 2.457536e-04
3.616298e-02 7.165297e-04
3.627927e-02 -2.310130e-03
3.628365e-02 1.636993e-03
3.629080e-02 2.123385e-03
3.640498e-02 -2.055200e-04
3.642283e-02 -1.092011e-04
3.642514e-02 1.354295e-03
3.644014e-02 -2.545322e-03
3.647205e-02 1.341554e-03
3.658343e-02 3.829930e-04
3.660199e-02 1.720950e-03
3.664084e-02 6.796546e-03
3.682426e-02 4.553072e-03
3.689552e-02 5.280533e-04
3.689835e-02 4.553317e-03
3.692095e-02 -9.244653e-04
3.706568e-02 6.292183e-04
3.711400e-02 2.761738e-03
3.726485e-02 2.977308e-04
3.728003e-02 -3.082644e-05
3.731828e-02 4.426154e-03
3.731828e-02 4.426154e-03
3.732331e-02 3.562026e-03
3.735119e-02 7.527361e-04
3.735823e-02 3.402295e-03
3.737242e-02 -3.523556e-04
3.739388e-02 1.511569e-03
3.744505e-02 -1.304384e-03
3.749175e-02 9.021878e-04
3.751734e-02 4.449851e-03
3.751734e-02 4.449851e-03
3.761070e-02 3.909755e-04
3.765491e-02 -2.038867e-03
3.771339e-02 4.214215e-03
3.776185e-02 6.379738e-04
3.778106e-02 1.018010e-03
3.778917e-02 1.749066e-03
3.779515e-02 2.395989e-04
3.782682e-02 1.998964e-03
3.783510e-02 -1.138594e-04
3.784943e-02 -2.179533e-03
3.785478e-02 1.030370e-03
3.794379e-02 -4.874819e-04
3.795739e-02 -6.893775e-04
3.797087e-02 -2.212687e-03
3.807605e-02 -3.088664e-03
3.809200e-02 1.015092e-03
3.822461e-02 2.602939e-03
3.823843e-02 3.175460e-03
3.825568e-02 -1.652305e-03
3.835763e-02 -9.828087e-04
3.838334e-02 1.066943e-02
3.839774e-02 -1.419793e-03
3.839774e-02 -1.419793e-03
3.842203e-02 9.243530e-04
3.843761e-02 1.539636e-03
3.844443e-02 -2.189034e-03
3.844443e-02 -2.189034e-03
3.848513e-02 2.455257e-03
3.849492e-02 4.904214e-03
3.851413e-02 -1.116551e-03
3.865707e-02 -6.793324e-04
3.872301e-02 3.292557e-04
3.872630e-02 -1.898098e-03
3.874424e-02 -1.614962e-03
3.875044e-02 -4.181666e-03
3.878767e-02 -2.373963e-03
3.891496e-02 5.048146e-03
3.892277e-02 5.859391e-03
3.895145e-02 9.542540e-04
3.896491e-02 3.767581e-03
3.898032e-02 4.412889e-04
3.900464e-02 8.931999e-04
3.901829e-02 1.845278e-03
3.901957e-02 -1.364639e-04
3.901957e-02 -1.364639e-04
3.912119e-02 3.878401e-03
3.914312e-02 -1.562183e-03
3.917049e-02 1.621897e-03
3.919258e-02 -1.823343e-05
3.919738e-02 -5.779425e-04
3.919738e-02 -5.779425e-04
3.924045e-02 -1.742388e-03
3.936273e-02 4.207299e-03
3.939201e-02 -1.046083e-03
3.939214e-02 -2.198677e-03
3.939382e-02 1.005152e-04
3.939592e-02 -2.278697e-03
3.942617e-02 1.250017e-03
3.945518e-02 -2.234749e-03
3.948984e-02 1.750311e-03
3.952758e-02 -5.853793e-04
3.957298e-02 -5.028606e-04
3.972008e-02 -1.907710e-03
3.973448e-02 -6.432100e-04
3.974208e-02 -1.457026e-03
3.981816e-02 3.850318e-03
3.983939e-02 -1.345044e-03
3.986944e-02 5.447616e-03
3.988633e-02 2.171797e-04
3.990020e-02 1.055385e-03
3.997768e-02 -2.833205e-03
4.002268e-02 1.582290e-04
4.003703e-02 -8.032602e-04
4.004775e-02 4.790368e-04
4.006106e-02 3.490688e-03
4.010538e-02 -5.907005e-04
4.013222e-02 -1.330666e-04
4.017627e-02 3.077886e-03
4.020098e-02 -8.836399e-04
4.020305e-02 1.118630e-04
4.020305e-02 1.118630e-04
4.030210e-02 3.162806e-03
4.030536e-02 4.233349e-04
4.041658e-02 1.158060e-03
4.041658e-02 1.158060e-03
4.045670e-02 -6.197767e-04
4.047047e-02 5.590270e-03
4.047531e-02 3.553033e-03
4.049333e-02 -8.112404e-04
4.052418e-02 -2.776419e-03
4.053917e-02 4.485985e-03
4.056155e-02 -1.369324e-03
4.062043e-02 -1.312417e-03
4.064034e-02 -3.526350e-04
4.065726e-02 1.869859e-03
4.066297e-02 -1.692572e-03
4.068614e-02 -1.607438e-03
4.070390e-02 5.371733e-04
4.070912e-02 3.475997e-03
4.070912e-02 3.475997e-03
4.075170e-02 3.485962e-03
4.078385e-02 8.447730e-04
4.079902e-02 3.269296e-03
4.081411e-02 -4.001132e-03
4.083201e-02 8.832436e-03
4.088963e-02 -1.136123e-03
4.090732e-02 -3.999075e-04
4.090841e-02 3.122852e-03
4.092088e-02 -7.384507e-04
4.092749e-02 -1.191173e-03
4.093539e-02 6.438326e-03
4.093539e-02 6.438326e-03
4.095616e-02 -2.670362e-04
4.095816e-02 -8.928742e-04
4.099726e-02 2.993572e-03
4.100500e-02 2.651557e-03
4.101510e-02 -2.712753e-03
4.102085e-02 7.033007e-04
4.108043e-02 -7.362896e-04
4.112466e-02 -3.527143e-04
4.114080e-02 -1.367050e-03
4.114513e-02 -3.484500e-04
4.122426e-02 3.610401e-04
4.130420e-02 1.134796e-03
4.134838e-02 1.017585e-02
4.138337e-02 -2.584746e-03
4.141362e-02 -4.757638e-04
4.142066e-02 1.194951e-03
4.144676e-02 -2.200665e-03
4.145597e-02 3.957076e-04
4.152738e-02 6.964314e-04
4.153328e-02 -1.906901e-03
4.154383e-02 5.008496e-03
4.154383e-02 5.008496e-03
4.158043e-02 -1.272509e-03
4.158728e-02 1.116811e-03
4.159678e-02 -2.314069e-03
4.160019e-02 2.469352e-03
4.167924e-02 -1.744117e-03
4.177228e-02 6.569224e-03
4.178017e-02 3.372553e-04
4.178913e-02 6.807905e-04
4.183853e-02 2.223456e-03
4.191987e-02 1.150125e-03
4.194512e-02 -1.142792e-03
4.200779e-02 -2.358914e-03
4.203072e-02 3.987445e-04
4.203653e-02 6.110541e-04
4.204041e-02 9.967667e-04
4.208131e-02 -6.185783e-04
4.208590e-02 -2.667578e-03
4.209162e-02 2.167709e-03
4.209162e-02 2.167709e-03
4.209243e-02 3.862563e-03
4.214708e-02 4.723867e-03
4.216055e-02 1.163392e-03
4.222406e-02 1.826344e-04
4.223910e-02 2.574956e-03
4.229602e-02 1.295669e-03
4.231209e-02 2.845199e-03
4.237038e-02 -4.365031e-05
4.238121e-02 -2.507836e-03
4.241011e-02 -2.716404e-03
4.250033e-02 7.718652e-05
4.253548e-02 8.598830e-05
4.256872e-02 9.993024e-04
4.258930e-02 -4.584912e-04
4.259841e-02 8.307696e-04
4.260808e-02 4.291923e-04
4.263615e-02 -6.438100e-04
4.268971e-02 1.344895e-03
4.272219e-02 4.426376e-03
4.274268e-02 6.270125e-03
4.274427e-02 8.488827e-04
4.283090e-02 -7.250923e-04
4.286662e-02 3.983114e-04
4.289495e-02 -1.615331e-03
4.296343e-02 7.484883e-03
4.303124e-02 -1.477307e-03
4.307170e-02 -2.431380e-03
4.310138e-02 2.402252e-03
4.310839e-02 1.301115e-03
4.310896e-02 1.177042e-04
4.312823e-02 3.586621e-03
4.319105e-02 2.628684e-04
4.320088e-02 3.520547e-03
4.322855e-02 -1.959984e-03
4.324901e-02 7.836672e-04
4.328092e-02 2.192957e-03
4.337107e-02 2.438421e-06
4.339352e-02 5.333381e-04
4.340408e-02 8.464125e-04
4.343919e-02 6.620040e-03
4.343919e-02 6.620040e-03
4.348952e-02 -2.231103e-03
4.358286e-02 -1.211354e-04
4.358312e-02 4.317847e-03
4.358746e-02 7.307170e-04
4.360007e-02 2.514797e-04
4.363120e-02 3.849363e-03
4.364188e-02 2.248903e-03
4.366060e-02 1.572011e-03
4.368132e-02 -2.618097e-03
4.368400e-02 5.072004e-03
4.372334e-02 6.406214e-04
4.372464e-02 7.032230e-03
4.373951e-02 4.461914e-03
4.375605e-02 1.092318e-03
4.378816e-02 -3.960916e-04
4.382280e-02 -1.943060e-03
4.384892e-02 9.545328e-04
4.394874e-02 8.561273e-04
4.397275e-02 1.505378e-03
4.398904e-02 -2.736232e-03
4.399263e-02 -1.047942e-03
4.404874e-02 2.605090e-03
4.407087e-02 7.900905e-04
4.409434e-02 1.522517e-03
4.410042e-02 -3.565252e-03
4.410712e-02 8.005624e-04
4.411838e-02 -1.646550e-03
4.414280e-02 2.279611e-03
4.414280e-02 2.279611e-03
4.417929e-02 4.640572e-04
4.418451e-02 -2.745096e-03
4.418955e-02 5.123779e-03
4.420788e-02 5.188637e-04
4.422748e-02 5.545480e-03
4.423658e-02 7.130837e-03
4.423658e-02 7.130837e-03
4.424303e-02 -1.539321e-03
4.425864e-02 2.755758e-03
4.427582e-02 -1.728001e-03
4.428228e-02 2.987146e-03
4.428381e-02 9.496138e-04
4.432017e-02 3.848396e-04
4.433053e-02 3.773367e-03
4.433403e-02 -6.408938e-04
4.435785e-02 -9.829465e-04
4.438070e-02 1.895731e-03
4.443473e-02 3.904794e-04
4.443964e-02 3.690288e-04
4.449529e-02 1.138226e-03
4.454957e-02 1.229920e-03
4.459491e-02 1.919944e-03
4.464120e-02 6.350101e-04
4.465767e-02 5.252323e-04
4.474404e-02 4.783519e-04
4.477085e-02 5.892787e-04
4.482436e-02 -1.130844e-03
4.484080e-02 -1.049564e-03
4.485286e-02 6.254681e-04
4.489691e-02 9.819208e-04
4.490829e-02 3.656858e-04
4.492235e-02 1.400627e-03
4.492677e-02 1.060214e-03
4.499956e-02 7.642605e-04
4.503343e-02 1.506516e-04
4.505874e-02 1.415365e-03
4.506301e-02 2.044819e-03
4.511795e-02 -3.261493e-03
4.512818e-02 -1.434451e-04
4.515468e-02 4.937487e-04
4.522494e-02 6.002961e-04
4.524171e-02 1.997755e-03
4.527012e-02 1.098640e-03
4.529750e-02 6.336941e-04
4.530233e-02 3.005646e-03
4.541076e-02 1.907175e-03
4.542635e-02 -8.952236e-04
4.542837e-02 3.360518e-03
4.543035e-02 1.385365e-03
4.545446e-02 -3.639574e-04
4.548219e-02 1.950603e-03
4.548864e-02 -3.703880e-04
4.551500e-02 -1.588842e-03
4.552389e-02 -7.055594e-04
4.553717e-02 -1.787459e-03
4.556085e-02 3.414571e-04
4.561119e-02 5.022799e-03
4.567061e-02 1.573638e-03
4.567856e-02 1.251345e-04
4.568469e-02 -1.082344e-03
4.568503e-02 4.958412e-04
4.573288e-02 -6.068735e-04
4.578473e-02 8.773375e-04
4.580675e-02 1.753225e-03
4.582220e-02 3.577490e-04
4.597177e-02 2.892323e-03
4.599602e-02 2.338839e-04
4.601272e-02 1.734424e-03
4.606215e-02 -3.565320e-04
4.608097e-02 5.319135e-04
4.609840e-02 -2.136549e-03
4.619324e-02 1.286715e-03
4.619399e-02 2.871493e-03
4.619399e-02 2.871493e-03
4.625131e-02 -3.918491e-03
4.626043e-02 -4.591224e-04
4.626775e-02 1.171045e-03
4.627659e-02 -1.466633e-04
4.629400e-02 -2.406680e-04
4.630658e-02 7.082798e-04
4.632678e-02 -5.320878e-04
4.634147e-02 -5.266988e-04
4.634894e-02 -1.198776e-03
4.636729e-02 4.247848e-03
4.641732e-02 -2.123676e-04
4.642079e-02 7.801001e-04
4.645707e-02 -4.268416e-03
4.652091e-02 1.293424e-03
4.659238e-02 1.681145e-03
4.663513e-02 -8.177614e-04
4.664284e-02 -8.050389e-04
4.666492e-02 4.467784e-04
4.667625e-02 1.725725e-03
4.673778e-02 1.167728e-03
4.676594e-02 -1.914396e-03
4.677740e-02 3.842059e-04
4.679645e-02 -1.340277e-03
4.680126e-02 5.588518e-03
4.684454e-02 1.219149e-03
4.687851e-02 -1.034574e-03
4.688057e-02 1.585024e-04
4.692629e-02 -5.502390e-03
4.695427e-02 -1.645355e-03
4.696214e-02 8.422117e-04
4.699897e-02 1.028859e-03
4.703206e-02 2.131093e-03
4.714211e-02 -4.400857e-04
4.716850e-02 4.038505e-03
4.718636e-02 -5.908540e-04
4.719368e-02 -5.143070e-04
4.724156e-02 4.172622e-03
4.724245e-02 -5.107879e-04
4.726592e-02 -5.527205e-04
4.727360e-02 4.992994e-04
4.730839e-02 1.380340e-03
4.733079e-02 -6.417837e-04
4.733817e-02 8.562280e-05
4.736950e-02 -1.742450e-03
4.740110e-02 3.800182e-03
4.741630e-02 6.869114e-03
4.742346e-02 1.251582e-03
4.754811e-02 -8.317907e-04
4.754811e-02 -8.317907e-04
4.765213e-02 -6.466855e-05
4.766420e-02 5.639711e-04
4.766795e-02 2.238105e-03
4.768403e-02 -1.961548e-03
4.772429e-02 -9.015686e-04
4.772617e-02 -1.711878e-03
4.772747e-02 -1.141706e-03
4.773409e-02 1.113102e-03
4.773971e-02 1.165031e-03
4.774369e-02 8.883451e-04
4.776319e-02 2.024623e-03
4.778776e-02 8.387161e-04
4.779777e-02 -1.562277e-03
4.788928e-02 -8.599896e-07
4.790782e-02 1.453261e-03
4.794245e-02 6.401386e-04
4.796267e-02 2.770404e-03
4.803236e-02 2.292254e-03
4.804140e-02 1.344167e-03
4.805159e-02 6.276130e-03
4.805684e-02 -1.064519e-04
4.806065e-02 5.757233e-04
4.806522e-02 1.134717e-03
4.810903e-02 -3.181698e-05
4.811882e-02 -1.487281e-03
4.813165e-02 -7.887506e-04
4.819583e-02 2.016369e-03
4.821377e-02 -2.295848e-04
4.822914e-02 -1.223339e-03
4.827500e-02 -2.189009e-03
4.830691e-02 -1.976343e-03
4.835731e-02 -2.459873e-03
4.837821e-02 8.271015e-04
4.840368e-02 1.014915e-03
4.845708e-02 -1.441156e-03
4.845882e-02 2.107009e-04
4.846774e-02 5.504949e-04
4.861022e-02 4.175165e-03
4.861112e-02 3.458725e-03
4.861803e-02 -2.023145e-03
4.862202e-02 2.520816e-03
4.867664e-02 -5.298135e-04
4.870579e-02 1.404822e-03
4.871656e-02 -3.374615e-03
4.872544e-02 -4.903923e-04
4.873359e-02 -1.972070e-03
4.873557e-02 -2.543123e-03
4.877717e-02 -2.390642e-03
4.878003e-02 6.096554e-04
4.879130e-02 1.158284e-03
4.883458e-02 5.010282e-04
4.889785e-02 7.857993e-04
4.891288e-02 -9.210436e-04
4.893728e-02 1.573629e-04
4.895889e-02 5.782426e-03
4.897797e-02 1.898538e-03
4.898263e-02 6.771328e-04
4.898288e-02 6.136771e-04
4.901490e-02 -4.610468e-04
4.901662e-02 -3.240478e-04
4.903984e-02 -3.397257e-03
4.904219e-02 2.337097e-03
4.904356e-02 3.121667e-03
4.906990e-02 -2.925307e-03
4.908507e-02 4.231400e-03
4.915777e-02 -7.592150e-04
4.916328e-02 -7.867997e-04
4.919393e-02 -2.072237e-03
4.920343e-02 1.300826e-03
4.920368e-02 2.739940e-03
4.920873e-02 -7.802283e-04
4.921370e-02 2.573136e-03
4.923194e-02 3.537087e-03
4.925926e-02 -2.167140e-05
4.928920e-02 -2.769649e-03
4.932094e-02 6.888555e-04
4.932675e-02 9.267182e-04
4.933025e-02 8.510007e-04
4.933883e-02 5.343738e-03
4.935573e-02 3.438003e-03
4.935981e-02 -1.956838e-03
4.938105e-02 -7.046622e-04
4.946845e-02 2.088732e-03
4.948433e-02 1.247708e-03
4.953399e-02 3.287679e-04
4.955565e-02 2.560606e-03
4.957430e-02 1.384744e-03
4.957819e-02 -1.138515e-03
4.959041e-02 9.858597e-04
4.960237e-02 5.766289e-04
4.961152e-02 -2.783669e-04
4.961826e-02 3.110728e-04
4.963149e-02 -9.053745e-04
4.963395e-02 2.272401e-04
4.964029e-02 2.439659e-03
4.964029e-02 2.439659e-03
4.965189e-02 3.545694e-03
4.965930e-02 1.069616e-03
4.967413e-02 8.583678e-04
4.969609e-02 -2.636994e-04
4.969997e-02 6.786262e-04
4.971756e-02 3.937287e-03
4.973644e-02 -3.770547e-03
4.973802e-02 1.861392e-03
4.976809e-02 1.715201e-03
4.976968e-02 8.262727e-04
4.979367e-02 2.775028e-03
4.980221e-02 1.017903e-03
4.982638e-02 3.508221e-03
4.983486e-02 8.049120e-04
4.986481e-02 -1.024627e-03
4.987100e-02 -6.302264e-03
4.987175e-02 4.038427e-03
4.989209e-02 3.280064e-03
4.989498e-02 -8.859657e-04
4.994905e-02 -3.046459e-03
4.996080e-02 3.163003e-03
4.996080e-02 3.163003e-03
4.997604e-02 3.680480e-03
5.000365e-02 8.239116e-04
5.001930e-02 -1.097711e-03
5.002016e-02 1.059447e-03
5.003428e-02 2.341471e-03
5.005533e-02 7.186553e-04
5.007811e-02 1.775877e-03
5.011434e-02 1.248662e-03
5.023390e-02 1.673986e-03
5.027458e-02 2.048649e-03
5.028126e-02 -1.536007e-03
5.029788e-02 4.903006e-04
5.029788e-02 4.903006e-04
5.033716e-02 2.980639e-04
5.039573e-02 -1.769457e-03
5.039737e-02 -3.152185e-03
5.042494e-02 1.346466e-03
5.045178e-02 2.095334e-03
5.046882e-02 3.007626e-03
5.048210e-02 1.451482e-03
5.049761e-02 -1.440386e-03
5.052000e-02 -1.253446e-03
5.052408e-02 4.411201e-03
5.057409e-02 -1.689208e-03
5.057730e-02 1.148104e-03
5.059537e-02 -1.530570e-03
5.060274e-02 -3.100289e-04
5.061334e-02 3.092008e-03
5.061527e-02 -1.117121e-03
5.062365e-02 1.161883e-03
5.064172e-02 1.419307e-03
5.064942e-02 -3.646297e-04
5.065354e-02 2.046423e-03
5.065431e-02 -2.071655e-03
5.066754e-02 -1.108786e-03
5.068198e-02 4.955340e-04
5.068677e-02 -1.123175e-03
5.068697e-02 2.217870e-04
5.069784e-02 -2.192036e-03
5.069784e-02 -2.192036e-03
5.070954e-02 -3.415784e-04
5.074350e-02 2.000146e-03
5.076318e-02 -1.150729e-03
5.078699e-02 1.427514e-03
5.080689e-02 2.005454e-03
5.080689e-02 2.005454e-03
5.081923e-02 4.931107e-04
5.082037e-02 3.571896e-03
5.085161e-02 -9.061798e-04
5.089154e-02 1.298381e-03
5.089566e-02 3.918274e-03
5.089566e-02 3.918274e-03
5.089764e-02 -1.777435e-03
5.090335e-02 -1.398396e-03
5.092856e-02 1.891861e-03
5.094223e-02 -2.416879e-04
5.095566e-02 -2.999122e-04
5.098190e-02 -4.023189e-03
5.099349e-02 1.766034e-03
5.099355e-02 -7.703566e-04
5.104379e-02 -2.052453e-04
5.106614e-02 4.766246e-05
5.107986e-02 1.488600e-03
5.108681e-02 5.226713e-03
5.109249e-02 -6.683361e-04
5.109709e-02 1.508513e-03
5.110217e-02 1.281095e-03
5.112389e-02 1.706200e-03
5.112923e-02 -1.554930e-03
5.119921e-02 5.671342e-03
5.121148e-02 2.234161e-04
5.124247e-02 3.022398e-03
5.124546e-02 1.741511e-03
5.125998e-02 2.242689e-03
5.127660e-02 -2.660423e-03
5.129273e-02 2.062518e-03
5.129945e-02 2.453634e-03
5.132163e-02 -1.283338e-03
5.132987e-02 2.046981e-03
5.133079e-02 1.259970e-03
5.142329e-02 -1.123344e-04
5.142403e-02 -1.106651e-03
5.153751e-02 3.857010e-03
5.154743e-02 -3.269183e-03
5.154830e-02 -1.463661e-03
5.154980e-02 1.498649e-04
5.158739e-02 -1.323263e-03
5.160064e-02 -1.137775e-03
5.164477e-02 2.126665e-03
5.166934e-02 2.790083e-03
5.176875e-02 1.527523e-03
5.180157e-02 1.190883e-03
5.181324e-02 4.158530e-03
5.185680e-02 5.914203e-03
5.186553e-02 1.473617e-03
5.187007e-02 -3.707194e-03
5.187082e-02 -1.189736e-03
5.187820e-02 -2.721047e-04
5.189196e-02 -4.458432e-03
5.190349e-02 2.456295e-04
5.193329e-02 -7.503895e-04
5.196174e-02 -2.717139e-03
5.197239e-02 -1.417761e-03
5.198305e-02 2.471988e-03
5.202211e-02 -1.313779e-03
5.202804e-02 8.553072e-04
5.203557e-02 -9.520531e-04
5.207171e-02 -1.300171e-03
5.211842e-02 1.560558e-03
5.214538e-02 2.156206e-03
5.215279e-02 9.181253e-04
5.219364e-02 -1.719097e-03
5.220240e-02 -1.797973e-03
5.222006e-02 -7.989785e-04
5.226678e-02 3.625641e-03
5.231208e-02 -1.821941e-03
5.233925e-02 2.080584e-03
5.237221e-02 7.989070e-04
5.237221e-02 7.989070e-04
5.237693e-02 -1.192495e-04
5.245168e-02 1.853793e-03
5.247293e-02 3.263406e-03
5.247837e-02 3.181113e-04
5.255363e-02 8.542010e-04
5.258398e-02 -2.344164e-03
5.262684e-02 2.182784e-04
5.263118e-02 8.557857e-04
5.265216e-02 8.073422e-04
5.267945e-02 5.600046e-04
5.267945e-02 5.600046e-04
5.269211e-02 -8.998352e-04
5.269687e-02 1.393494e-03
5.269928e-02 -5.009414e-04
5.270173e-02 1.782336e-04
5.270287e-02 4.744545e-04
5.270910e-02 -1.030863e-03
5.270910e-02 -1.030863e-03
5.271237e-02 2.601199e-03
5.271738e-02 -1.537514e-03
5.274061e-02 -6.392589e-04
5.274895e-02 -1.168165e-03
5.275816e-02 -1.867855e-03
5.278417e-02 4.195968e-04
5.278534e-02 -4.073843e-04
5.280069e-02 -2.088835e-03
5.280628e-02 6.431081e-04
5.280660e-02 -5.237781e-04
5.280903e-02 -1.062281e-03
5.282973e-02 1.085148e-03
5.287994e-02 1.640228e-03
5.293996e-02 -1.367131e-03
5.296445e-02 -3.206619e-03
5.297602e-02 9.694039e-04
5.299617e-02 3.016880e-03
5.299701e-02 5.530477e-03
5.303004e-02 1.538174e-03
5.303952e-02 -1.759955e-03
5.303988e-02 2.308726e-03
5.307471e-02 3.257895e-03
5.307899e-02 -6.005660e-03
5.308020e-02 4.002645e-03
5.310977e-02 -1.232166e-03
5.312587e-02 1.020442e-03
5.313926e-02 2.595867e-03
5.314680e-02 1.569964e-03
5.315893e-02 5.330021e-03
5.317568e-02 -3.042292e-04
5.323391e-02 2.451291e-03
5.324221e-02 2.713617e-03
5.328468e-02 -1.928927e-03
5.329336e-02 8.779656e-03
5.330581e-02 1.347804e-03
5.330633e-02 5.677386e-03
5.331669e-02 3.950005e-04
5.334365e-02 -3.347970e-04
5.335102e-02 4.757237e-04
5.336599e-02 -6.378697e-04
5.337116e-02 -3.221735e-03
5.338365e-02 2.438948e-03
5.339702e-02 3.980253e-03
5.341476e-02 -6.483939e-04
5.343009e-02 -2.328553e-03
5.343065e-02 -1.695717e-03
5.345898e-02 2.172412e-03
5.346972e-02 9.314072e-04
5.346972e-02 9.314072e-04
5.350049e-02 2.986454e-03
5.355935e-02 -2.280835e-04
5.356609e-02 4.614320e-05
5.357429e-02 3.505762e-04
5.361916e-02 1.178605e-03
5.363566e-02 -6.810742e-04
5.365295e-02 -2.281212e-03
5.366150e-02 -1.116697e-03
5.367352e-02 2.475348e-03
5.367857e-02 5.092423e-03
5.368865e-02 1.039566e-03
5.369996e-02 3.614835e-03
5.372618e-02 -9.756402e-04
5.378765e-02 -8.166399e-04
5.380100e-02 -3.458164e-03
5.381725e-02 1.281721e-03
5.386783e-02 3.185914e-03
5.387938e-02 1.411882e-03
5.388228e-02 2.676312e-04
5.393368e-02 1.579403e-03
5.393368e-02 1.579403e-03
5.400523e-02 2.617950e-03
5.401994e-02 2.544354e-03
5.402316e-02 7.047605e-04
5.403198e-02 -1.078595e-03
5.403934e-02 2.114550e-03
5.404419e-02 1.034861e-02
5.407538e-02 1.345326e-03
5.411223e-02 -2.295896e-03
5.411390e-02 -6.862017e-04
5.423503e-02 4.303671e-03
5.423521e-02 3.142600e-03
5.425948e-02 9.928543e-04
5.429327e-02 6.966587e-04
5.429422e-02 7.162560e-05
5.430280e-02 5.850728e-04
5.431203e-02 5.007060e-04
5.431628e-02 1.261966e-03
5.433107e-02 -1.387621e-04
5.433155e-02 6.899476e-03
5.434376e-02 -3.425669e-04
5.438298e-02 1.193499e-03
5.439182e-02 2.963280e-03
5.442583e-02 1.049993e-03
5.445212e-02 5.507212e-04
5.445800e-02 1.389873e-03
5.445906e-02 1.432623e-04
5.448143e-02 3.915636e-04
5.448777e-02 1.222689e-03
5.448777e-02 1.222689e-03
5.448955e-02 2.009824e-03
5.449730e-02 2.322100e-03
5.450359e-02 2.662290e-03
5.451841e-02 2.594689e-03
5.452561e-02 -1.579376e-03
5.453235e-02 -1.443607e-03
5.457647e-02 2.572031e-03
5.457654e-02 -6.760356e-04
5.458285e-02 4.663158e-04
5.458894e-02 -7.951474e-04
5.459972e-02 1.452096e-03
5.460654e-02 -7.245084e-04
5.461870e-02 -8.275101e-04
5.465385e-02 -1.600155e-03
5.468507e-02 2.071056e-04
5.470925e-02 6.163484e-03
5.471183e-02 -5.867243e-04
5.474157e-02 -6.512332e-04
5.477905e-02 4.444488e-03
5.478443e-02 1.905315e-03
5.478496e-02 2.841750e-04
5.480505e-02 1.753775e-04
5.484472e-02 2.681080e-03
5.485050e-02 2.635878e-03
5.492043e-02 7.723341e-04
5.495210e-02 -6.560884e-04
5.495826e-02 2.408893e-03
5.497973e-02 5.747874e-04
5.501186e-02 1.699372e-03
5.504003e-02 1.271591e-02
5.504497e-02 -2.849701e-03
5.506643e-02 5.435273e-03
5.509409e-02 4.684314e-03
5.510068e-02 4.737892e-04
5.510516e-02 -2.036937e-04
5.511012e-02 -1.610733e-03
5.511438e-02 -2.985372e-05
5.512025e-02 -2.267207e-03
5.517322e-02 6.810441e-04
5.520118e-02 3.999427e-03
5.522454e-02 -3.604895e-04
5.522903e-02 -4.908217e-04
5.523000e-02 2.466218e-03
5.524719e-02 6.397414e-04
5.530669e-02 1.253115e-03
5.531154e-02 1.056208e-04
5.531598e-02 -2.896568e-03
5.535603e-02 1.240488e-03
5.537040e-02 -2.133737e-03
5.538200e-02 -6.075747e-04
5.538200e-02 -6.075747e-04
5.540188e-02 -5.053079e-04
5.540262e-02 6.276410e-03
5.541178e-02 -1.655667e-03
5.541815e-02 -7.739906e-05
5.546196e-02 -2.442290e-03
5.546196e-02 -2.442290e-03
5.547126e-02 -1.229680e-03
5.554524e-02 -6.453514e-04
5.557092e-02 -1.082443e-05
5.560503e-02 5.753526e-04
5.566040e-02 -3.083563e-03
5.568515e-02 1.442568e-03
5.570381e-02 5.146660e-04
5.572588e-02 4.983402e-03
5.572711e-02 -1.916019e-03
5.575004e-02 -1.296929e-03
5.577637e-02 1.490813e-03
5.580204e-02 3.651408e-04
5.584074e-02 -2.872092e-04
5.585765e-02 1.644836e-03
5.585819e-02 2.739434e-03
5.589363e-02 1.859504e-03
5.589707e-02 1.588155e-03
5.590002e-02 1.021805e-03
5.590757e-02 1.587958e-03
5.590942e-02 3.236913e-03
5.591035e-02 -1.603928e-04
5.592075e-02 3.251227e-03
5.592679e-02 -2.297837e-03
5.592987e-02 -1.535850e-04
5.595904e-02 -1.399292e-03
5.596394e-02 6.326686e-03
5.596466e-02 -2.955332e-04
5.596657e-02 4.900277e-03
5.597474e-02 -2.122407e-03
5.606575e-02 -7.073855e-04
5.609515e-02 7.694023e-04
5.610412e-02 -2.165493e-03
5.611085e-02 -2.482040e-04
5.614266e-02 1.745558e-03
5.618717e-02 4.003287e-03
5.619647e-02 2.761323e-04
5.619677e-02 1.470025e-03
5.624205e-02 -1.136657e-03
5.627703e-02 -1.083993e-03
5.628281e-02 -2.118246e-03
5.635701e-02 4.973240e-04
5.636697e-02 1.186796e-03
5.638957e-02 2.388155e-03
5.641413e-02 2.807590e-03
5.641891e-02 6.193675e-03
5.642449e-02 5.652346e-03
5.648343e-02 1.682697e-03
5.649252e-02 8.633770e-04
5.651425e-02 -5.169622e-04
5.651772e-02 1.664675e-03
5.653320e-02 1.930931e-03
5.654512e-02 1.039133e-03
5.659138e-02 4.324357e-03
5.660761e-02 1.380616e-03
5.660761e-02 1.380616e-03
5.663291e-02 -3.115054e-03
5.663878e-02 -1.184900e-03
5.663985e-02 1.292922e-03
5.665528e-02 -5.322929e-03
5.666215e-02 -7.606414e-03
5.667808e-02 -2.143612e-03
5.668804e-02 -1.672212e-03
5.670719e-02 5.223632e-03
5.672346e-02 -1.142265e-04
5.672346e-02 -1.142265e-04
5.672347e-02 8.364356e-04
5.672460e-02 -1.819068e-04
5.672921e-02 -8.425711e-04
5.678177e-02 1.320539e-03
5.678440e-02 -3.295034e-03
5.679626e-02 1.291972e-03
5.680816e-02 2.933672e-03
5.681638e-02 7.674888e-04
5.683227e-02 4.324069e-04
5.684616e-02 -2.671170e-05
5.685229e-02 -3.712469e-03
5.685292e-02 4.900514e-03
5.685329e-02 6.654965e-05
5.686391e-02 1.341378e-03
5.687549e-02 -7.840717e-04
5.692286e-02 3.889553e-03
5.693427e-02 9.305538e-04
5.697036e-02 -2.299143e-03
5.701735e-02 4.787914e-03
5.706298e-02 1.366734e-03
5.706679e-02 1.263062e-02
5.709254e-02 4.949095e-03
5.711493e-02 -1.015697e-03
5.713248e-02 -4.177691e-04
5.713638e-02 -2.377194e-03
5.715135e-02 -1.262265e-03
5.717105e-02 -4.186809e-04
5.718064e-02 1.699520e-03
5.718441e-02 3.006067e-03
5.719962e-02 2.530731e-04
5.719976e-02 -2.002020e-03
5.721871e-02 3.616330e-04
5.725951e-02 -1.483321e-03
5.727279e-02 -1.973724e-03
5.730692e-02 1.198292e-03
5.732848e-02 1.014089e-04
5.733686e-02 -2.419822e-03
5.734283e-02 9.952961e-04
5.735960e-02 -2.449601e-03
5.739942e-02 -1.498595e-03
5.743860e-02 -4.982670e-04
5.743920e-02 1.913572e-04
5.743920e-02 1.913572e-04
5.743945e-02 6.772314e-05
5.744936e-02 5.879723e-04
5.745287e-02 -2.690917e-04
5.745500e-02 1.060353e-03
5.745678e-02 2.691100e-03
5.746960e-02 5.138676e-05
5.749755e-02 4.547337e-03
5.749826e-02 2.748966e-04
5.750149e-02 1.768066e-03
5.750278e-02 3.389190e-04
5.753660e-02 -6.278102e-05
5.754063e-02 2.979824e-03
5.754701e-02 3.173086e-04
5.756034e-02 6.411069e-06
5.757175e-02 -1.015187e-03
5.757863e-02 -1.464574e-03
5.763636e-02 3.134149e-03
5.763902e-02 1.606812e-03
5.765413e-02 3.482124e-03
5.766228e-02 1.766949e-03
5.766995e-02 4.147325e-04
5.767202e-02 -7.026971e-04
5.767219e-02 -1.736149e-05
5.767523e-02 9.314294e-04
5.768315e-02 3.269327e-03
5.769859e-02 2.167529e-03
5.771964e-02 -3.582401e-03
5.778432e-02 9.833645e-04
5.782117e-02 -1.712828e-04
5.783306e-02 3.737138e-03
5.787712e-02 -7.755370e-04
5.788471e-02 -1.695800e-03
5.789117e-02 2.584795e-03
5.789267e-02 -5.212818e-03
5.790591e-02 9.984607e-04
5.791008e-02 -4.097584e-04
5.791150e-02 3.936102e-04
5.793144e-02 3.079831e-03
5.793708e-02 -1.406968e-03
5.794780e-02 -3.093003e-04
5.796268e-02 5.149931e-04
5.796649e-02 1.780645e-03
5.798151e-02 -2.564081e-05
5.798259e-02 -7.549970e-04
5.798322e-02 1.826578e-03
5.799377e-02 -1.458542e-03
5.800301e-02 8.548924e-04
5.801709e-02 6.377768e-04
5.805113e-02 -1.760339e-03
5.805227e-02 5.206492e-03
5.805838e-02 -1.836263e-03
5.810505e-02 2.614647e-03
5.812464e-02 1.533382e-05
5.815295e-02 -2.432064e-04
5.816302e-02 9.129611e-04
5.817317e-02 -9.450093e-04
5.820437e-02 -1.575000e-04
5.821035e-02 2.540911e-04
5.822093e-02 7.273139e-03
5.823589e-02 5.811006e-04
5.825245e-02 1.993932e-04
5.828200e-02 -1.071626e-03
5.828909e-02 -1.806425e-03
5.830840e-02 1.695279e-03
5.831093e-02 6.223906e-04
5.831284e-02 -2.861518e-03
5.831446e-02 2.944512e-03
5.835428e-02 -7.381492e-04
5.837011e-02 1.010117e-02
5.837610e-02 1.159743e-03
5.839708e-02 6.962840e-04
5.840020e-02 4.403919e-04
5.842557e-02 8.469174e-03
5.843203e-02 2.330832e-03
5.848446e-02 9.757837e-04
5.850757e-02 -1.648426e-03
5.850765e-02 2.227261e-03
5.852038e-02 -9.949587e-05
5.853765e-02 6.255664e-03
5.854491e-02 -1.563287e-03
5.854543e-02 2.481122e-03
5.857638e-02 -9.953848e-04
5.858741e-02 4.200111e-04
5.859035e-02 3.141203e-03
5.860188e-02 4.146417e-03
5.860188e-02 4.146417e-03
5.861308e-02 -7.626255e-04
5.864682e-02 1.312892e-03
5.865366e-02 -1.376567e-03
5.865965e-02 4.920679e-06
5.868151e-02 2.362742e-04
5.868867e-02 -1.486749e-03
5.871601e-02 -1.937358e-03
5.871715e-02 1.180434e-03
5.871748e-02 -1.722018e-03
5.871748e-02 -1.722018e-03
5.871990e-02 8.780255e-04
5.873600e-02 -6.496618e-04
5.874915e-02 5.144310e-03
5.878068e-02 4.309834e-04
5.880379e-02 -2.342360e-03
5.882257e-02 7.980275e-04
5.887353e-02 6.628433e-03
5.887601e-02 -7.355462e-05
5.889334e-02 -6.133815e-04
5.889669e-02 1.248264e-03
5.889883e-02 -6.089874e-05
5.894656e-02 6.612764e-04
5.895293e-02 2.878172e-03
5.895627e-02 -2.097801e-03
5.897214e-02 1.185410e-03
5.897661e-02 -3.107399e-04
5.898291e-02 1.849496e-04
5.898856e-02 4.530615e-04
5.901512e-02 5.114364e-05
5.901823e-02 -8.763744e-04
5.903242e-02 6.470004e-04
5.905843e-02 2.896533e-03
5.906167e-02 4.715058e-03
5.906174e-02 5.957451e-04
5.906455e-02 -3.767140e-04
5.907949e-02 1.084245e-03
5.910509e-02 2.277911e-03
5.912966e-02 -4.275185e-04
5.918133e-02 -3.045544e-03
5.920305e-02 -1.223879e-03
5.920863e-02 5.197947e-03
5.922982e-02 -6.403459e-04
5.924045e-02 -4.475879e-04
5.933880e-02 1.181079e-03
5.933880e-02 1.181079e-03
5.934254e-02 -1.043141e-03
5.941335e-02 -3.848871e-03
5.941335e-02 -3.848871e-03
5.942047e-02 2.174301e-03
5.942967e-02 -1.043972e-05
5.942967e-02 -1.043972e-05
5.942967e-02 -1.043972e-05
5.942967e-02 -1.043972e-05
5.943887e-02 2.002667e-03
5.944865e-02 2.324452e-03
5.945084e-02 1.748966e-03
5.947840e-02 -6.851564e-05
5.949772e-02 2.615382e-03
5.951531e-02 -1.554194e-03
5.954053e-02 -1.084436e-03
5.957107e-02 -2.566710e-03
5.957378e-02 -1.097252e-03
5.957454e-02 -1.032716e-03
5.958670e-02 6.777367e-04
5.959265e-02 7.373669e-04
5.959372e-02 -3.173239e-03
5.961378e-02 1.360827e-03
5.961511e-02 -2.049081e-03
5.962965e-02 1.762767e-03
5.963335e-02 -8.099584e-04
5.964762e-02 -2.606626e-03
5.966959e-02 2.474922e-03
5.970710e-02 1.168332e-03
5.972462e-02 2.292215e-04
5.977033e-02 -2.024904e-03
5.977097e-02 -8.427671e-04
5.978418e-02 5.196892e-04
5.979286e-02 3.462743e-04
5.979661e-02 2.362358e-03
5.980495e-02 5.288997e-04
5.980844e-02 -2.624670e-03
5.982641e-02 -9.698145e-04
5.984517e-02 2.308311e-03
5.985480e-02 -6.856683e-04
5.987185e-02 -1.651945e-03
5.988061e-02 7.087825e-04
5.990085e-02 8.959526e-04
5.990599e-02 -1.067048e-03
5.995725e-02 7.154002e-04
5.996906e-02 2.378211e-04
5.998477e-02 -3.387925e-04
5.999766e-02 -8.225296e-05
6.006266e-02 2.961021e-04
6.007798e-02 5.914173e-03
6.009649e-02 4.961603e-03
6.010714e-02 -2.212524e-03
6.012534e-02 -7.666058e-04
6.013734e-02 7.418954e-04
6.015708e-02 2.534888e-03
6.016859e-02 -1.293279e-03
6.017908e-02 9.817194e-05
6.022015e-02 5.883057e-03
6.022639e-02 -4.616251e-05
6.022681e-02 2.928208e-03
6.024878e-02 1.101185e-03
6.026623e-02 9.989535e-05
6.026940e-02 4.001434e-04
6.026940e-02 4.001434e-04
6.027801e-02 -1.503718e-03
6.028952e-02 -3.682025e-03
6.029144e-02 -6.194407e-05
6.031087e-02 -1.979043e-03
6.033775e-02 1.321933e-03
6.036826e-02 -3.136796e-03
6.038202e-02 3.610068e-03
6.045354e-02 2.761934e-04
6.045426e-02 1.238254e-04
6.047978e-02 -8.808035e-04
6.048652e-02 2.100761e-03
6.048652e-02 2.100761e-03
6.048776e-02 4.479283e-04
6.050175e-02 5.236500e-03
6.050206e-02 8.111246e-04
6.051490e-02 -3.595702e-04
6.052391e-02 2.035511e-03
6.054669e-02 2.042081e-03
6.055897e-02 2.471384e-03
6.055897e-02 2.471384e-03
6.056936e-02 -1.309192e-03
6.058293e-02 9.358800e-04
6.058813e-02 2.238259e-04
6.060098e-02 -6.178789e-04
6.060098e-02 -6.178789e-04
6.060604e-02 8.161803e-04
6.063909e-02 -1.203665e-03
6.064465e-02 1.269200e-03
6.064465e-02 1.269200e-03
6.064729e-02 -2.187264e-03
6.064767e-02 3.492817e-04
6.070299e-02 6.507625e-04
6.071985e-02 2.125386e-04
6.073023e-02 1.289245e-03
6.081818e-02 3.425152e-03
6.082701e-02 2.977083e-04
6.083667e-02 7.687140e-04
6.086233e-02 -3.778495e-03
6.088097e-02 -8.977920e-04
6.088364e-02 -1.298953e-03
6.090829e-02 3.936819e-03
6.091100e-02 -4.924551e-06
6.093812e-02 4.377188e-04
6.094288e-02 8.343656e-05
6.094288e-02 8.343656e-05
6.097538e-02 -2.014202e-03
6.098612e-02 -1.630462e-03
6.099493e-02 -6.825978e-04
6.101629e-02 4.610836e-03
6.101747e-02 6.546111e-04
6.102098e-02 -6.499481e-04
6.103945e-02 7.597882e-03
6.106443e-02 -1.687676e-03
6.106855e-02 1.348609e-03
6.108189e-02 3.098753e-03
6.108498e-02 -1.346985e-03
6.109802e-02 2.859399e-06
6.110839e-02 -5.773842e-04
6.112882e-02 2.695337e-03
6.113915e-02 -1.660088e-04
6.113915e-02 -1.660088e-04
6.115376e-02 9.011843e-04
6.116273e-02 -2.119200e-03
6.116390e-02 2.434292e-03
6.119549e-02 1.100432e-03
6.123527e-02 4.052158e-04
6.123944e-02 9.067921e-04
6.124907e-02 2.072911e-03
6.125681e-02 -1.184490e-03
6.126895e-02 6.817412e-04
6.128951e-02 4.841011e-03
6.128951e-02 4.841011e-03
6.130152e-02 1.628998e-03
6.132048e-02 1.462200e-03
6.132961e-02 2.791892e-04
6.133414e-02 -3.614662e-04
6.133572e-02 -5.041663e-04
6.135739e-02 -8.556952e-04
6.135869e-02 4.607129e-03
6.136514e-02 -2.645047e-03
6.141156e-02 9.538668e-04
6.141523e-02 -3.608975e-04
6.141994e-02 -6.687176e-04
6.148890e-02 -9.470285e-04
6.150232e-02 5.256734e-04
6.151006e-02 2.759510e-03
6.151006e-02 2.759510e-03
6.155522e-02 6.039534e-03
6.155571e-02 3.809910e-03
6.157703e-02 1.385781e-03
6.161695e-02 -2.181536e-03
6.162580e-02 5.366870e-03
6.163100e-02 -3.070332e-04
6.163771e-02 -1.673345e-03
6.165708e-02 -1.539893e-03
6.166130e-02 3.847557e-04
6.168426e-02 -7.097833e-04
6.170073e-02 2.139153e-03
6.170551e-02 -1.837847e-03
6.171154e-02 8.645864e-04
6.172531e-02 -1.326581e-03
6.175784e-02 -2.867876e-03
6.176149e-02 3.783119e-03
6.177110e-02 -1.432596e-03
6.178226e-02 8.264945e-04
6.178591e-02 -2.588055e-03
6.179712e-02 -6.733322e-04
6.179913e-02 2.887169e-03
6.183644e-02 1.154888e-03
6.184749e-02 7.671702e-04
6.185322e-02 1.631164e-03
6.187045e-02 -4.347585e-05
6.188781e-02 8.849599e-04
6.194265e-02 -1.230240e-03
6.195061e-02 1.852531e-03
6.196549e-02 -2.173091e-03
6.197629e-02 -1.145812e-03
6.199198e-02 9.518757e-04
6.206627e-02 1.533363e-03
6.210126e-02 1.344317e-03
6.210479e-02 -2.883100e-03
6.210744e-02 1.003014e-03
6.210947e-02 -9.214943e-04
6.212679e-02 5.804098e-03
6.214799e-02 -1.325647e-03
6.215047e-02 8.892913e-04
6.215460e-02 3.334372e-04
6.216665e-02 1.743592e-03
6.217896e-02 -9.028146e-04
6.218068e-02 1.687826e-03
6.218240e-02 4.192901e-04
6.218616e-02 1.188515e-03
6.219531e-02 -2.516746e-03
6.221926e-02 1.368214e-03
6.222681e-02 -3.019676e-04
6.223703e-02 7.579947e-04
6.228849e-02 7.752576e-04
6.229502e-02 2.752445e-03
6.230898e-02 -5.864513e-04
6.235024e-02 -6.540861e-04
6.235333e-02 2.375349e-03
6.235512e-02 4.030238e-04
6.235556e-02 3.538452e-03
6.236927e-02 1.804134e-03
6.236927e-02 1.804134e-03
6.237589e-02 2.630245e-03
6.238617e-02 -1.966516e-03
6.239645e-02 1.932641e-05
6.242337e-02 8.917923e-04
6.248419e-02 -7.009800e-04
6.258345e-02 -1.115669e-03
6.258346e-02 5.146931e-04
6.260474e-02 1.287986e-03
6.262027e-02 -1.268077e-03
6.267692e-02 -9.843589e-05
6.270778e-02 -2.917516e-03
6.271594e-02 1.416402e-03
6.271720e-02 2.453389e-03
6.272098e-02 -2.491793e-04
6.273028e-02 2.431152e-04
6.275388e-02 5.081165e-03
6.276370e-02 -3.242662e-04
6.277792e-02 -1.673774e-03
6.278394e-02 -2.453315e-03
6.278455e-02 -9.367966e-04
6.278455e-02 -9.367966e-04
6.280474e-02 2.645578e-03
6.280488e-02 2.103168e-03
6.280679e-02 -3.376497e-03
6.283797e-02 -1.530057e-03
6.284258e-02 5.896634e-04
6.286059e-02 3.620288e-03
6.289146e-02 1.109215e-03
6.290211e-02 6.515908e-05
6.290852e-02 -2.229237e-03
6.291555e-02 -1.290105e-03
6.291818e-02 1.699923e-03
6.292321e-02 2.508925e-03
6.294002e-02 -1.600822e-03
6.294767e-02 1.517060e-03
6.296394e-02 -3.663981e-04
6.297698e-02 5.044039e-03
6.299841e-02 -2.358418e-03
6.301597e-02 -4.046928e-04
6.308607e-02 -1.909569e-03
6.308965e-02 -1.949731e-03
6.311118e-02 2.987547e-04
6.312512e-02 -1.717497e-03
6.313578e-02 -4.018129e-04
6.313661e-02 -2.152746e-03
6.315849e-02 -1.339807e-04
6.316086e-02 2.438343e-03
6.318191e-02 2.061591e-03
6.321916e-02 -1.878579e-03
6.323806e-02 -1.557370e-03
6.325878e-02 -5.848885e-04
6.325938e-02 -6.072363e-04
6.327127e-02 1.206616e-03
6.327170e-02 -5.262954e-04
6.328221e-02 -1.969608e-03
6.328980e-02 -2.379841e-03
6.329152e-02 -1.459714e-03
6.330342e-02 -6.749379e-04
6.332196e-02 2.501486e-03
6.335966e-02 -4.437480e-04
6.339481e-02 3.676972e-03
6.340339e-02 -2.201866e-03
6.342893e-02 5.130776e-04
6.343820e-02 2.298967e-03
6.349347e-02 -1.766877e-04
6.351393e-02 -9.767482e-04
6.353264e-02 2.991959e-03
6.356578e-02 2.188825e-05
6.358911e-02 3.668414e-04
6.360909e-02 1.881743e-03
6.361000e-02 3.822165e-04
6.364790e-02 6.152403e-04
6.366437e-02 3.383518e-03
6.366571e-02 -8.349735e-04
6.369573e-02 7.536865e-04
6.369605e-02 -9.125595e-04
6.370202e-02 -1.854378e-03
6.371150e-02 -1.983525e-03
6.371419e-02 3.037847e-03
6.371716e-02 7.620804e-04
6.372413e-02 -6.236017e-04
6.376893e-02 -1.833008e-03
6.376964e-02 1.447340e-03
6.377614e-02 4.152626e-03
6.377964e-02 1.466596e-03
6.378600e-02 -2.477739e-03
6.378655e-02 1.908722e-04
6.380495e-02 -1.645564e-03
6.380953e-02 5.488678e-04
6.382102e-02 1.392814e-04
6.386317e-02 1.318842e-03
6.387349e-02 1.275691e-03
6.387720e-02 5.122030e-04
6.387818e-02 -6.994122e-04
6.389629e-02 -5.244455e-03
6.390820e-02 -1.286861e-03
6.391698e-02 1.157934e-03
6.391784e-02 8.147383e-04
6.392024e-02 4.435822e-03
6.392267e-02 -1.072820e-03
6.393316e-02 2.248645e-04
6.397695e-02 -1.008486e-03
6.400013e-02 -2.354071e-03
6.400543e-02 6.724180e-03
6.403541e-02 -2.195249e-03
6.405985e-02 7.110265e-04
6.406217e-02 -3.672079e-04
6.407267e-02 2.415001e-03
6.407410e-02 -1.318074e-03
6.407850e-02 5.094139e-03
6.409531e-02 -4.214935e-04
6.410363e-02 -4.484331e-03
6.412053e-02 7.742567e-04
6.412723e-02 -2.078249e-03
6.413866e-02 1.443117e-03
6.414121e-02 1.874463e-03
6.418726e-02 8.614643e-04
6.420500e-02 -2.131413e-03
6.421519e-02 3.038126e-03
6.422782e-02 2.027843e-03
6.425338e-02 7.522484e-04
6.427120e-02 1.184457e-03
6.427355e-02 1.416520e-03
6.428438e-02 2.403510e-03
6.428993e-02 1.208716e-03
6.430550e-02 -1.377764e-03
6.432204e-02 -1.515127e-03
6.435003e-02 4.227687e-04
6.436082e-02 -1.725559e-03
6.436288e-02 1.068058e-03
6.437419e-02 -1.162092e-03
6.437877e-02 3.211410e-03
6.437976e-02 5.242203e-03
6.439132e-02 -1.178095e-03
6.439633e-02 1.372952e-03
6.439633e-02 1.372952e-03
6.442368e-02 1.248733e-03
6.442595e-02 3.059651e-03
6.442710e-02 3.035273e-03
6.443238e-02 1.910602e-03
6.444597e-02 5.252413e-05
6.445559e-02 2.182999e-04
6.446199e-02 -4.132419e-03
6.446410e-02 2.081243e-03
6.446439e-02 -9.400065e-04
6.446617e-02 5.577396e-04
6.446885e-02 -2.288984e-04
6.447770e-02 3.015563e-03
6.450632e-02 -9.748351e-04
6.451479e-02 -1.773823e-03
6.451829e-02 -6.468713e-04
6.456054e-02 1.103820e-03
6.456281e-02 5.355515e-05
6.457174e-02 3.909098e-04
6.457671e-02 1.021401e-03
6.459593e-02 -3.620976e-05
6.461854e-02 1.628381e-03
6.462095e-02 5.890535e-04
6.465726e-02 -2.275695e-03
6.465821e-02 -2.656476e-03
6.466634e-02 -1.386549e-03
6.466895e-02 1.740750e-03
6.467287e-02 2.067046e-03
6.468177e-02 -2.747413e-03
6.470037e-02 7.989872e-04
6.472106e-02 -5.310486e-04
6.472131e-02 3.438223e-03
6.474799e-02 -4.553299e-03
6.475662e-02 4.120009e-03
6.477282e-02 -2.305856e-03
6.477823e-02 1.379263e-03
6.481349e-02 -2.795142e-04
6.481591e-02 -3.582316e-03
6.482384e-02 -9.890810e-04
6.485418e-02 -5.348774e-04
6.486619e-02 7.036783e-04
6.487013e-02 1.144670e-03
6.487069e-02 2.442909e-03
6.487554e-02 -3.204867e-03
6.487812e-02 -1.069306e-03
6.488823e-02 1.725014e-04
6.490158e-02 1.410479e-03
6.494910e-02 -1.621526e-03
6.497388e-02 1.461725e-02
6.498040e-02 2.946368e-03
6.499063e-02 9.386720e-04
6.499994e-02 -4.490387e-03
6.500288e-02 2.501994e-03
6.501295e-02 1.586409e-03
6.501354e-02 2.365394e-03
6.502685e-02 -2.523300e-03
6.503308e-02 4.077374e-03
6.506814e-02 8.997239e-04
6.507957e-02 1.326251e-03
6.509886e-02 -1.772020e-03
6.510233e-02 6.192016e-04
6.512452e-02 7.263807e-04
6.512998e-02 3.959873e-03
6.517074e-02 -1.227464e-03
6.517175e-02 -1.432329e-04
6.517864e-02 -4.131080e-04
6.519645e-02 7.040891e-04
6.519983e-02 -1.010618e-03
6.520570e-02 -1.406129e-03
6.523156e-02 1.123182e-04
6.523301e-02 -2.936184e-03
6.524381e-02 -6.653965e-04
6.526726e-02 2.688339e-03
6.526726e-02 2.688339e-03
6.526908e-02 6.720580e-03
6.527511e-02 8.769965e-04
6.531018e-02 8.816850e-04
6.531491e-02 3.886361e-03
6.531492e-02 -1.450956e-03
6.531572e-02 2.014527e-03
6.531766e-02 3.875548e-05
6.532201e-02 -1.229035e-03
6.536604e-02 9.769654e-04
6.537568e-02 2.485534e-03
6.538693e-02 2.357709e-03
6.539095e-02 -1.767691e-03
6.540007e-02 6.683361e-03
6.540376e-02 3.801853e-05
6.544397e-02 2.508171e-03
6.546591e-02 -1.264273e-03
6.546628e-02 4.708688e-04
6.546937e-02 1.289344e-03
6.550882e-02 1.556565e-03
6.552137e-02 -8.836993e-04
6.552901e-02 -3.700430e-03
6.553337e-02 1.401386e-03
6.554791e-02 1.101477e-03
6.558065e-02 9.360334e-04
6.564419e-02 3.984675e-03
6.567253e-02 -2.915943e-03
6.567387e-02 7.718554e-04
6.568395e-02 9.377114e-04
6.570902e-02 -6.893550e-04
6.572431e-02 -3.218131e-03
6.572574e-02 -2.380722e-03
6.573911e-02 -1.147201e-03
6.574290e-02 3.495488e-03
6.574938e-02 6.733461e-04
6.575751e-02 6.179742e-03
6.578387e-02 -1.236454e-03
6.579330e-02 -9.552652e-04
6.581787e-02 3.092040e-03
6.582613e-02 1.365463e-03
6.582918e-02 1.991427e-03
6.584181e-02 1.073980e-04
6.586189e-02 4.666877e-04
6.587541e-02 1.392410e-03
6.587950e-02 -2.448802e-03
6.588435e-02 -1.508591e-03
6.592094e-02 -1.342753e-03
6.593563e-02 1.982485e-03
6.595737e-02 7.966116e-03
6.602401e-02 9.085388e-04
6.602413e-02 1.600286e-03
6.602650e-02 4.071885e-04
6.604066e-02 4.386577e-04
6.605815e-02 3.017859e-03
6.606946e-02 6.680536e-04
6.608397e-02 -1.681772e-04
6.610339e-02 -1.040862e-03
6.610907e-02 -1.785362e-03
6.612333e-02 9.972231e-04
6.613541e-02 -3.848072e-04
6.614750e-02 9.934936e-04
6.614790e-02 2.721481e-03
6.616140e-02 -5.269175e-04
6.619724e-02 -1.728249e-03
6.622106e-02 -1.293642e-03
6.622996e-02 6.241690e-04
6.623584e-02 -2.552790e-03
6.627024e-02 5.258475e-05
6.628562e-02 -6.888035e-04
6.629489e-02 1.800595e-03
6.629571e-02 -6.738217e-04
6.632691e-02 4.753926e-04
6.633432e-02 7.892527e-03
6.635082e-02 1.864921e-03
6.636602e-02 4.073797e-03
6.637449e-02 9.858887e-04
6.639079e-02 1.903177e-03
6.643502e-02 -1.381419e-04
6.645288e-02 -4.022027e-03
6.645577e-02 2.869998e-03
6.645893e-02 -8.156871e-04
6.647001e-02 -5.127381e-04
6.647469e-02 1.335006e-03
6.649640e-02 -1.040842e-03
6.650758e-02 2.557411e-03
6.653303e-02 -7.458282e-04
6.653303e-02 -7.458282e-04
6.654941e-02 -7.781022e-04
6.655503e-02 4.520612e-04
6.656656e-02 1.957572e-03
6.656664e-02 2.863207e-03
6.657619e-02 6.196294e-04
6.657818e-02 -2.778856e-03
6.657947e-02 2.378703e-03
6.658715e-02 1.234019e-03
6.661372e-02 1.593311e-03
6.664247e-02 3.656004e-03
6.666120e-02 -1.029459e-03
6.666783e-02 9.038131e-04
6.667650e-02 5.862230e-04
6.668694e-02 8.085581e-04
6.668909e-02 4.466930e-03
6.669807e-02 -7.099172e-04
6.670562e-02 8.312254e-04
6.671686e-02 4.697157e-03
6.673988e-02 1.160198e-03
6.676489e-02 5.458728e-03
6.679769e-02 1.000424e-03
6.681840e-02 2.164759e-03
6.683081e-02 -4.790620e-04
6.684884e-02 1.154665e-03
6.685093e-02 9.180402e-04
6.686185e-02 -1.837540e-03
6.686449e-02 4.229577e-03
6.688129e-02 4.594608e-03
6.688232e-02 -9.763053e-04
6.689005e-02 1.484489e-03
6.691377e-02 -8.793900e-04
6.692190e-02 -2.797964e-04
6.692667e-02 -2.812239e-05
6.694657e-02 -1.917970e-03
6.696837e-02 6.878750e-04
6.698429e-02 -2.236273e-03
6.699300e-02 2.107796e-03
6.701071e-02 -2.428700e-03
6.707193e-02 -5.995127e-04
6.709600e-02 -2.345415e-03
6.710479e-02 -7.909435e-04
6.711402e-02 -9.520499e-04
6.713601e-02 1.682986e-03
6.714413e-02 -2.420405e-03
6.714637e-02 1.802679e-03
6.715141e-02 6.679922e-04
6.717231e-02 -1.871425e-04
6.717539e-02 -4.406810e-03
6.723543e-02 -3.291154e-03
6.724284e-02 -4.064481e-04
6.725263e-02 2.561126e-03
6.725985e-02 2.356791e-03
6.727422e-02 5.804682e-04
6.728887e-02 4.076018e-04
6.732277e-02 4.966758e-03
6.732817e-02 -4.509154e-04
6.734304e-02 -2.513734e-03
6.734327e-02 -1.026730e-03
6.737178e-02 -7.738662e-04
6.737611e-02 2.308162e-03
6.737787e-02 3.389830e-03
6.738192e-02 1.693158e-04
6.738442e-02 -1.028309e-03
6.741896e-02 -7.705043e-05
6.744506e-02 -1.110548e-03
6.744534e-02 1.058916e-03
6.745073e-02 3.308975e-03
6.746366e-02 6.172868e-04
6.747994e-02 3.276009e-03
6.748754e-02 2.175461e-03
6.749104e-02 5.379243e-03
6.750537e-02 -1.720155e-03
6.750641e-02 2.661840e-03
6.750837e-02 -9.648228e-04
6.753653e-02 1.119172e-02
6.753892e-02 3.129119e-03
6.754032e-02 -1.665366e-03
6.754381e-02 1.991588e-03
6.757835e-02 1.148776e-04
6.760477e-02 3.293937e-03
6.762631e-02 1.146102e-03
6.765202e-02 4.632281e-03
6.766349e-02 -1.824898e-03
6.766916e-02 -1.137156e-03
6.767923e-02 2.160918e-03
6.768224e-02 -2.725694e-04
6.770238e-02 -3.429216e-04
6.770733e-02 1.820333e-03
6.774762e-02 6.765830e-04
6.776565e-02 -1.493816e-03
6.778288e-02 -2.039954e-03
6.780882e-02 6.349270e-03
6.783094e-02 -1.233549e-03
6.786222e-02 2.686389e-03
6.787238e-02 1.456831e-03
6.788829e-02 -7.348545e-04
6.791057e-02 1.425585e-04
6.791349e-02 8.421532e-04
6.792211e-02 -5.103016e-04
6.793204e-02 -7.537891e-04
6.793208e-02 1.431647e-04
6.793687e-02 -4.705731e-04
6.794715e-02 3.197361e-03
6.796368e-02 -1.218806e-03
6.796548e-02 2.430873e-03
6.797821e-02 -2.254405e-03
6.799691e-02 3.948342e-03
6.800120e-02 1.461134e-03
6.802043e-02 2.230768e-03
6.803347e-02 6.294500e-03
6.807475e-02 -2.046074e-03
6.807506e-02 7.479608e-04
6.809223e-02 1.780287e-03
6.809432e-02 2.028512e-03
6.809614e-02 7.403226e-04
6.812517e-02 1.511300e-03
6.813548e-02 -6.818432e-05
6.817481e-02 7.288752e-04
6.817752e-02 -1.478059e-03
6.819549e-02 -9.965614e-04
6.824238e-02 -1.877371e-03
6.824783e-02 1.119778e-03
6.825440e-02 1.936887e-03
6.825598e-02 2.013978e-03
6.825667e-02 2.264365e-03
6.825816e-02 -2.418559e-03
6.826031e-02 -2.503100e-04
6.826368e-02 -3.129385e-03
6.828195e-02 -2.553707e-03
6.828700e-02 -4.356307e-03
6.831044e-02 1.545272e-03
6.831205e-02 2.964936e-03
6.832860e-02 4.017153e-03
6.834549e-02 -2.045695e-04
6.835064e-02 5.789851e-03
6.835798e-02 -7.637282e-04
6.838162e-02 1.582667e-03
6.839593e-02 4.210581e-04
6.840520e-02 6.342968e-04
6.841073e-02 -1.401606e-03
6.842042e-02 -2.222294e-03
6.843238e-02 -1.816970e-03
6.844367e-02 -2.142889e-03
6.848704e-02 2.381222e-03
6.851482e-02 6.015580e-04
6.852120e-02 -5.515483e-04
6.853141e-02 5.396197e-03
6.854110e-02 1.167203e-03
6.856597e-02 1.499423e-03
6.856902e-02 -2.291955e-03
6.861287e-02 -8.704988e-04
6.861287e-02 -8.704988e-04
6.862890e-02 3.425546e-03
6.864547e-02 5.633517e-04
6.865384e-02 2.590767e-03
6.865550e-02 3.674383e-03
6.866049e-02 -7.853534e-04
6.867741e-02 -3.295727e-03
6.867848e-02 2.032498e-03
6.871909e-02 1.331499e-03
6.872776e-02 3.213392e-03
6.873801e-02 1.579585e-03
6.874470e-02 2.722989e-04
6.878616e-02 -9.187475e-04
6.878806e-02 1.047165e-03
6.879931e-02 -1.432954e-03
6.880067e-02 -6.476155e-04
6.880212e-02 -9.958481e-05
6.881577e-02 1.042272e-03
6.883435e-02 1.437618e-03
6.885438e-02 -7.899148e-04
6.885541e-02 -3.265817e-03
6.886105e-02 1.185514e-03
6.887263e-02 5.454325e-04
6.888528e-02 -8.810229e-04
6.891177e-02 1.737251e-03
6.894822e-02 -2.443110e-04
6.896093e-02 -4.348353e-03
6.896303e-02 3.588546e-03
6.896972e-02 2.987031e-03
6.897129e-02 6.803196e-04
6.898384e-02 1.805757e-04
6.898452e-02 2.756815e-03
6.898512e-02 3.096627e-03
6.898891e-02 3.069558e-03
6.898893e-02 6.716470e-04
6.899261e-02 9.023556e-03
6.899766e-02 1.074612e-03
6.901009e-02 -6.935371e-04
6.901319e-02 -2.914529e-03
6.901892e-02 7.006795e-04
6.904878e-02 4.297036e-04
6.906136e-02 1.231040e-04
6.906191e-02 2.390903e-03
6.909191e-02 1.730871e-03
6.911132e-02 4.896534e-04
6.913439e-02 1.192501e-03
6.913884e-02 -1.268895e-03
6.914425e-02 -1.839030e-03
6.916118e-02 -4.043675e-04
6.918576e-02 -4.458283e-04
6.918932e-02 4.085794e-04
6.922286e-02 -8.616043e-04
6.924939e-02 5.091607e-03
6.927965e-02 -1.209452e-03
6.928165e-02 -6.114242e-04
6.929524e-02 3.289708e-04
6.930414e-02 -2.154587e-03
6.931021e-02 -1.592216e-03
6.932529e-02 5.186067e-03
6.933068e-02 -1.626465e-03
6.935552e-02 -3.621273e-03
6.939835e-02 -4.771984e-03
6.940461e-02 -1.224405e-03
6.940466e-02 -7.058256e-04
6.941128e-02 4.025431e-03
6.942036e-02 -2.038613e-03
6.943708e-02 7.395214e-04
6.944196e-02 4.194805e-03
6.947141e-02 -1.176640e-03
6.949443e-02 3.227276e-04
6.949445e-02 1.862430e-03
6.949706e-02 -1.729437e-03
6.949871e-02 3.239825e-04
6.950751e-02 5.104583e-03
6.951954e-02 -1.978234e-03
6.958344e-02 6.568197e-03
6.958874e-02 3.297239e-03
6.960121e-02 -6.741300e-05
6.961527e-02 9.590174e-04
6.961599e-02 -2.004953e-03
6.962583e-02 2.085405e-03
6.963004e-02 4.133540e-04
6.964273e-02 1.570440e-03
6.965986e-02 5.115777e-04
6.966565e-02 1.283569e-03
6.970638e-02 4.500134e-04
6.971181e-02 1.803501e-03
6.973511e-02 -9.700035e-04
6.974025e-02 -1.015969e-03
6.974688e-02 6.329741e-04
6.975045e-02 1.714942e-03
6.975073e-02 7.505838e-04
6.975287e-02 6.069822e-04
6.976192e-02 2.497098e-03
6.977072e-02 -2.944797e-03
6.978563e-02 -9.578009e-04
6.979972e-02 -2.312483e-04
6.980172e-02 1.618018e-03
6.981667e-02 -6.188003e-04
6.981884e-02 -3.396888e-03
6.982601e-02 -8.419935e-04
6.985707e-02 -4.503363e-03
6.986227e-02 -3.130374e-03
6.991725e-02 1.088309e-03
6.991967e-02 -2.947377e-03
6.993232e-02 1.101766e-04
6.993494e-02 -9.099434e-04
6.995440e-02 -5.768947e-04
6.998118e-02 -6.490522e-04
6.998734e-02 1.137423e-03
6.999553e-02 4.948639e-03
7.003610e-02 -2.334852e-03
7.003946e-02 2.807599e-03
7.005827e-02 -3.961070e-04
7.006254e-02 -1.221632e-03
7.006373e-02 3.727778e-03
7.006375e-02 2.615773e-04
7.007820e-02 3.910110e-03
7.011692e-02 4.439127e-03
7.012707e-02 -2.651627e-04
7.012707e-02 -2.651627e-04
7.016207e-02 3.902451e-03
7.021559e-02 6.764207e-04
7.024245e-02 9.258801e-04
7.025334e-02 6.451842e-03
7.025849e-02 6.084535e-04
7.027066e-02 -7.222730e-04
7.027795e-02 2.650703e-03
7.030009e-02 -1.474885e-03
7.034859e-02 1.609304e-04
7.036177e-02 -2.207039e-03
7.037834e-02 2.302989e-03
7.039983e-02 1.156730e-03
7.040478e-02 3.674256e-03
7.040839e-02 -1.845031e-03
7.040956e-02 -8.734924e-04
7.041759e-02 -1.162763e-03
7.043356e-02 4.340142e-04
7.045023e-02 6.032573e-03
7.048208e-02 5.631245e-04
7.050485e-02 2.976751e-03
7.051870e-02 1.365405e-03
7.052073e-02 -1.209785e-03
7.055383e-02 -3.459714e-04
7.056976e-02 -4.641044e-04
7.060879e-02 -3.664923e-05
7.062244e-02 1.772923e-03
7.062351e-02 6.455898e-04
7.062876e-02 3.032638e-03
7.063151e-02 4.781457e-04
7.063823e-02 -1.161741e-03
7.066245e-02 6.561098e-03
7.067397e-02 -1.780519e-03
7.067397e-02 -1.780519e-03
7.067759e-02 3.900741e-03
7.069731e-02 5.499892e-03
7.071550e-02 3.772138e-04
7.072130e-02 7.164245e-04
7.073521e-02 -3.638387e-04
7.075181e-02 -6.975271e-04
7.075185e-02 -2.717737e-04
7.075233e-02 4.262054e-04
7.075783e-02 -1.788320e-03
7.076082e-02 -5.270469e-04
7.076528e-02 2.118968e-04
7.080689e-02 1.959466e-03
7.084330e-02 8.030963e-05
7.084348e-02 -3.574058e-04
7.084556e-02 1.187639e-03
7.086518e-02 1.091932e-03
7.087744e-02 2.099750e-03
7.087812e-02 8.799445e-04
7.088019e-02 7.342610e-04
7.089202e-02 1.767871e-03
7.090927e-02 -2.121924e-03
7.092035e-02 -1.746589e-03
7.094572e-02 3.136636e-03
7.095806e-02 -2.134890e-03
7.096197e-02 -3.732878e-04
7.096927e-02 2.291997e-03
7.096956e-02 2.266145e-03
7.097989e-02 1.317867e-03
7.098168e-02 1.519082e-03
7.099242e-02 1.250634e-03
7.099429e-02 1.165717e-03
7.100202e-02 1.693172e-04
7.101428e-02 2.123962e-03
7.102126e-02 3.860833e-03
7.102126e-02 3.860833e-03
7.102376e-02 -1.683661e-03
7.102845e-02 -2.215074e-03
7.103630e-02 4.835759e-03
7.103630e-02 4.835759e-03
7.105376e-02 -1.747570e-04
7.106297e-02 6.049031e-03
7.107948e-02 -9.827457e-04
7.109494e-02 -2.340436e-03
7.111061e-02 8.959057e-03
7.111425e-02 5.650967e-04
7.112118e-02 9.244601e-04
7.112196e-02 9.729871e-04
7.114074e-02 1.481057e-03
7.114842e-02 1.365190e-03
7.114922e-02 -2.851163e-03
7.117137e-02 5.482272e-03
7.117348e-02 4.595184e-05
7.118978e-02 -5.231997e-04
7.119834e-02 -4.097331e-03
7.120231e-02 -1.166198e-03
7.120857e-02 -6.908141e-03
7.123986e-02 -7.427835e-04
7.126736e-02 2.942972e-04
7.126736e-02 2.942972e-04
7.126767e-02 -1.512010e-03
7.127592e-02 4.203086e-04
7.128369e-02 -5.937576e-04
7.129668e-02 1.666045e-03
7.130109e-02 3.183931e-03
7.130581e-02 2.624400e-03
7.131138e-02 5.614805e-03
7.132783e-02 2.371552e-03
7.134005e-02 8.299546e-03
7.135890e-02 -1.156768e-03
7.138758e-02 -2.301913e-03
7.140789e-02 4.195497e-04
7.143162e-02 1.722473e-03
7.143331e-02 -6.421719e-04
7.146357e-02 -1.754437e-03
7.146397e-02 -1.117742e-04
7.146653e-02 -4.054179e-04
7.146995e-02 2.362712e-03
7.147609e-02 1.004113e-03
7.150825e-02 -1.208633e-03
7.150825e-02 -1.208633e-03
7.151273e-02 -1.354211e-03
7.152196e-02 2.516636e-03
7.153163e-02 6.981624e-04
7.156150e-02 -4.172517e-04
7.156712e-02 -1.830330e-03
7.156767e-02 -9.919842e-04
7.157063e-02 4.586896e-03
7.160271e-02 5.488196e-05
7.160271e-02 5.488196e-05
7.160449e-02 -9.881685e-04
7.160518e-02 -4.500949e-03
7.161146e-02 1.456459e-03
7.162137e-02 1.602514e-03
7.162809e-02 6.420635e-04
7.163811e-02 -3.658578e-03
7.166882e-02 7.750393e-04
7.168941e-02 2.691045e-03
7.168955e-02 -1.422385e-03
7.169521e-02 -1.676189e-03
7.170632e-02 1.452484e-03
7.171234e-02 -7.393242e-04
7.172057e-02 1.933793e-04
7.179100e-02 -6.049907e-04
7.180085e-02 -2.337919e-03
7.181404e-02 1.859760e-03
7.184099e-02 5.263370e-03
7.184519e-02 -1.353878e-03
7.187349e-02 1.529261e-03
7.188057e-02 4.460109e-03
7.188546e-02 -4.483489e-03
7.192861e-02 2.393179e-04
7.196884e-02 -1.029528e-03
7.197072e-02 8.106877e-04
7.202592e-02 -2.275943e-03
7.203363e-02 1.029407e-03
7.203790e-02 -1.531986e-03
7.204648e-02 2.369848e-03
7.206453e-02 2.593380e-03
7.206655e-02 2.410435e-03
7.207161e-02 1.464265e-03
7.208195e-02 9.806452e-04
7.213382e-02 3.699426e-03
7.216410e-02 -1.338084e-03
7.220554e-02 -1.402355e-03
7.221506e-02 -1.164452e-03
7.222833e-02 -9.940355e-04
7.223680e-02 3.314817e-03
7.223709e-02 -2.417044e-04
7.224861e-02 -9.652390e-04
7.225006e-02 -5.072860e-04
7.227639e-02 8.484393e-04
7.228353e-02 1.395396e-03
7.228663e-02 7.568016e-04
7.231491e-02 4.964948e-03
7.232185e-02 7.111166e-04
7.233760e-02 4.255611e-03
7.235320e-02 -1.084855e-03
7.235853e-02 -1.279062e-03
7.236374e-02 3.648470e-03
7.238085e-02 3.448288e-03
7.238104e-02 -6.169068e-04
7.238534e-02 -6.352699e-04
7.239887e-02 -7.366485e-04
7.240662e-02 3.908100e-03
7.241474e-02 -6.298679e-04
7.242896e-02 7.461075e-04
7.243515e-02 2.120329e-03
7.244434e-02 5.481730e-04
7.244764e-02 -1.443925e-03
7.244998e-02 -1.107065e-03
7.247743e-02 3.565938e-03
7.249594e-02 5.993253e-03
7.251269e-02 -2.328806e-04
7.251413e-02 -1.805687e-03
7.252257e-02 9.780716e-04
7.253207e-02 -2.815354e-04
7.253692e-02 -4.684864e-04
7.254465e-02 2.764568e-03
7.255149e-02 -2.327464e-03
7.255609e-02 -7.441627e-04
7.256422e-02 -1.754595e-03
7.256449e-02 2.110431e-03
7.257258e-02 -2.214425e-03
7.257495e-02 -3.947037e-03
7.259147e-02 3.453376e-03
7.259680e-02 2.534501e-03
7.259848e-02 6.665204e-04
7.260921e-02 -1.481785e-03
7.261412e-02 3.667063e-03
7.261702e-02 9.284875e-04
7.261712e-02 -2.026195e-03
7.263878e-02 -1.425978e-03
7.266383e-02 1.081101e-03
7.266907e-02 6.700238e-04
7.267542e-02 2.289298e-03
7.267819e-02 1.275641e-03
7.268525e-02 -1.497785e-03
7.269589e-02 5.846360e-03
7.270665e-02 -3.877205e-04
7.271445e-02 7.706550e-04
7.271910e-02 -2.631558e-04
7.272645e-02 5.920761e-03
7.273838e-02 -1.017528e-03
7.275765e-02 2.202800e-03
7.276507e-02 -4.203187e-05
7.277321e-02 7.559889e-04
7.278721e-02 7.182950e-04
7.278721e-02 7.182950e-04
7.281590e-02 -2.179175e-03
7.282275e-02 -2.243867e-03
7.283487e-02 -5.867464e-04
7.285267e-02 1.191077e-03
7.290182e-02 -2.666038e-03
7.291455e-02 -1.586393e-03
7.294043e-02 1.317917e-03
7.295276e-02 -5.675689e-04
7.295415e-02 9.796392e-04
7.298436e-02 1.110730e-03
7.298436e-02 1.110730e-03
7.298787e-02 -3.726147e-04
7.299510e-02 -1.715325e-05
7.300496e-02 5.939878e-03
7.302717e-02 2.593377e-03
7.306453e-02 -9.024782e-04
7.306669e-02 3.350112e-03
7.308006e-02 -2.165273e-03
7.308658e-02 -5.466758e-03
7.310402e-02 7.118210e-03
7.312694e-02 7.088286e-04
7.313091e-02 1.321087e-03
7.313519e-02 5.120109e-03
7.314912e-02 -1.100878e-03
7.315764e-02 7.458816e-04
7.315964e-02 -8.374014e-04
7.317093e-02 1.089706e-03
7.317161e-02 1.457185e-03
7.317170e-02 -1.284672e-04
7.317610e-02 2.395055e-03
7.319246e-02 -1.108843e-03
7.320135e-02 6.390121e-04
7.320590e-02 -1.603972e-03
7.320803e-02 5.828385e-03
7.321780e-02 6.362869e-04
7.322422e-02 6.656224e-04
7.322932e-02 9.557307e-04
7.323092e-02 3.386215e-03
7.325281e-02 -2.056190e-04
7.326144e-02 2.528467e-04
7.326339e-02 1.689834e-03
7.327675e-02 9.765040e-04
7.327782e-02 -1.653170e-03
7.329905e-02 8.820234e-04
7.329905e-02 8.820234e-04
7.330386e-02 1.665366e-04
7.332592e-02 1.811262e-03
7.333191e-02 -3.779053e-04
7.333431e-02 3.767892e-04
7.335552e-02 -3.312591e-03
7.340037e-02 2.705066e-03
7.340413e-02 -7.048166e-04
7.342925e-02 5.355538e-04
7.343747e-02 -9.160386e-04
7.344045e-02 2.161686e-04
7.345159e-02 1.027516e-03
7.347786e-02 1.916123e-03
7.349290e-02 4.237923e-04
7.350258e-02 -1.609327e-03
7.350258e-02 -1.609327e-03
7.350425e-02 -3.312011e-03
7.350581e-02 -3.925999e-03
7.352555e-02 1.913671e-03
7.353146e-02 8.353624e-03
7.354796e-02 3.061014e-03
7.355349e-02 1.524766e-04
7.356455e-02 4.126188e-03
7.357206e-02 -1.085828e-03
7.357349e-02 1.902733e-03
7.357557e-02 -2.097246e-03
7.358435e-02 3.677484e-03
7.359794e-02 -1.015500e-03
7.362791e-02 -4.180019e-04
7.363044e-02 -3.064207e-03
7.363642e-02 -2.621627e-03
7.363861e-02 7.413383e-04
7.364212e-02 -3.551519e-04
7.365742e-02 2.442764e-05
7.367287e-02 -1.354268e-04
7.367932e-02 4.949702e-03
7.367932e-02 4.949702e-03
7.371083e-02 -6.414709e-04
7.371383e-02 7.910781e-04
7.374881e-02 4.107240e-04
7.374985e-02 -7.053037e-04
7.376221e-02 -6.080095e-04
7.376366e-02 1.609605e-03
7.377355e-02 -5.132498e-04
7.379226e-02 -5.758526e-04
7.381744e-02 3.409980e-03
7.381850e-02 4.622031e-03
7.384665e-02 1.515786e-03
7.385451e-02 -1.885486e-04
7.386880e-02 -1.519327e-03
7.390269e-02 -7.121512e-05
7.391202e-02 2.026889e-03
7.391547e-02 3.286796e-03
7.392039e-02 1.173155e-03
7.393289e-02 1.689382e-03
7.395218e-02 -2.541787e-03
7.396399e-02 -5.819592e-04
7.397591e-02 3.242594e-03
7.398857e-02 -9.356409e-05
7.402523e-02 -9.248972e-04
7.402599e-02 2.575792e-03
7.403748e-02 -1.220582e-03
7.404121e-02 -7.856598e-04
7.404717e-02 1.773620e-03
7.404728e-02 3.196248e-03
7.405422e-02 -8.778362e-04
7.406280e-02 -1.195529e-03
7.406445e-02 2.100827e-03
7.407122e-02 1.895428e-03
7.407138e-02 9.854901e-04
7.407863e-02 7.746934e-04
7.408443e-02 -8.077005e-04
7.409037e-02 -7.152548e-04
7.409789e-02 3.051833e-03
7.411204e-02 -1.470409e-03
7.411967e-02 -2.744357e-03
7.413430e-02 1.782729e-03
7.414115e-02 5.535821e-03
7.414518e-02 1.804585e-03
7.414644e-02 9.019093e-04
7.414825e-02 7.051729e-04
7.417276e-02 4.427913e-03
7.418128e-02 -2.269545e-03
7.418698e-02 -8.529287e-04
7.419486e-02 1.268825e-03
7.419488e-02 -1.525517e-04
7.420962e-02 4.736326e-06
7.421186e-02 -1.000979e-03
7.422105e-02 1.805346e-03
7.424676e-02 -2.675521e-03
7.426093e-02 7.368720e-03
7.427263e-02 5.887189e-03
7.429495e-02 -7.263673e-04
7.429842e-02 -1.408153e-03
7.431594e-02 -1.699956e-03
7.434629e-02 -3.866531e-03
7.434833e-02 -3.736529e-04
7.434833e-02 -3.736529e-04
7.436177e-02 3.292901e-03
7.444700e-02 2.405892e-03
7.447269e-02 -2.600430e-03
7.449074e-02 -2.026597e-03
7.449908e-02 6.061512e-04
7.450630e-02 -1.389832e-03
7.450716e-02 1.052296e-03
7.452022e-02 3.642897e-03
7.452296e-02 -1.146732e-03
7.453106e-02 -7.198318e-04
7.453411e-02 -1.408505e-03
7.454393e-02 9.614564e-04
7.455552e-02 1.305375e-03
7.457530e-02 -2.200132e-03
7.459527e-02 9.581943e-05
7.459743e-02 9.021498e-04
7.460302e-02 -2.583238e-03
7.461838e-02 6.690896e-03
7.462833e-02 -9.203808e-04
7.466403e-02 -1.468956e-03
7.466403e-02 -1.468956e-03
7.466926e-02 -1.654336e-03
7.467184e-02 2.903966e-03
7.467350e-02 2.374866e-03
7.467841e-02 2.962977e-04
7.471520e-02 2.422799e-03
7.473605e-02 1.153797e-03
7.475261e-02 9.116176e-04
7.477338e-02 3.983674e-03
7.477962e-02 -6.715855e-05
7.478230e-02 -5.520297e-04
7.479256e-02 -1.109070e-03
7.482196e-02 -1.047567e-03
7.483093e-02 -7.589839e-05
7.484607e-02 -2.162733e-04
7.484768e-02 -1.655038e-03
7.485576e-02 4.677509e-03
7.487681e-02 3.137727e-03
7.488110e-02 -2.767606e-03
7.488180e-02 1.923740e-03
7.490149e-02 4.656940e-03
7.491346e-02 2.884332e-03
7.491832e-02 8.999924e-04
7.492362e-02 -3.146448e-03
7.495558e-02 -1.814434e-03
7.495565e-02 -4.760276e-04
7.496409e-02 -6.744239e-04
7.497605e-02 1.057798e-03
7.499499e-02 -1.466459e-03
7.501252e-02 -2.654403e-03
7.501252e-02 -2.654403e-03
7.501280e-02 -3.936812e-04
7.503157e-02 -3.062309e-04
7.503954e-02 5.385499e-03
7.503954e-02 5.385499e-03
7.504234e-02 9.111289e-04
7.505930e-02 -1.499449e-03
7.506782e-02 1.135749e-03
7.507602e-02 9.744772e-04
7.507693e-02 6.892858e-04
7.509190e-02 5.789590e-04
7.511849e-02 4.530601e-05
7.512143e-02 1.477690e-03
7.514496e-02 -2.617676e-03
7.514800e-02 -4.296221e-05
7.517847e-02 -1.139755e-03
7.518225e-02 3.067031e-03
7.518763e-02 -1.446283e-03
7.519106e-02 5.514375e-03
7.519106e-02 5.514375e-03
7.519266e-02 -1.927181e-03
7.520629e-02 -1.098319e-03
7.523991e-02 -1.216836e-03
7.524221e-02 1.582813e-03
7.525165e-02 -2.027824e-03
7.527088e-02 -1.168381e-04
7.527423e-02 2.188934e-03
7.528685e-02 -2.038543e-03
7.528893e-02 7.040662e-04
7.530669e-02 1.931405e-04
7.531234e-02 -1.670812e-03
7.531447e-02 1.945897e-04
7.532090e-02 1.567548e-03
7.533290e-02 2.407475e-03
7.534085e-02 1.857621e-04
7.534672e-02 -1.276093e-03
7.535198e-02 4.540103e-03
7.535500e-02 -4.556831e-04
7.536073e-02 4.201767e-03
7.538720e-02 4.064004e-03
7.540992e-02 -1.389144e-03
7.541012e-02 -1.263055e-03
7.541680e-02 8.441430e-04
7.542460e-02 3.259227e-03
7.543151e-02 -1.626947e-03
7.545546e-02 -1.205842e-03
7.546249e-02 -2.012218e-04
7.547773e-02 -1.663179e-03
7.547788e-02 -2.697763e-04
7.548347e-02 -1.131139e-04
7.548662e-02 -5.646689e-04
7.548854e-02 8.237445e-03
7.551789e-02 -1.174349e-04
7.552609e-02 -2.173297e-03
7.553671e-02 2.915529e-03
7.553796e-02 1.442921e-03
7.553902e-02 -1.596252e-03
7.555113e-02 -2.816787e-04
7.560990e-02 5.317615e-03
7.560990e-02 5.317615e-03
7.562498e-02 -5.733859e-04
7.563194e-02 1.410577e-03
7.568396e-02 9.503380e-04
7.569016e-02 5.209878e-03
7.569340e-02 3.314041e-04
7.570703e-02 -1.242967e-03
7.572151e-02 -2.153567e-04
7.572250e-02 1.099171e-03
7.572901e-02 1.285983e-03
7.574510e-02 7.364730e-03
7.575121e-02 9.703109e-04
7.575434e-02 -2.423505e-03
7.575434e-02 -2.423505e-03
7.575443e-02 -1.497174e-03
7.575782e-02 -1.155916e-03
7.582660e-02 -8.186772e-04
7.582872e-02 -1.613888e-03
7.582928e-02 1.852571e-03
7.584669e-02 -9.496997e-04
7.585039e-02 2.410986e-03
7.585151e-02 2.803776e-04
7.586832e-02 5.290515e-04
7.588333e-02 5.052688e-03
7.588761e-02 3.499082e-03
7.588900e-02 1.577410e-03
7.588963e-02 -1.213428e-04
7.589578e-02 -9.641184e-04
7.589735e-02 -2.410763e-05
7.589777e-02 2.937760e-03
7.591379e-02 1.461974e-03
7.593786e-02 -6.819118e-04
7.594956e-02 1.123337e-03
7.595085e-02 -6.159942e-04
7.596012e-02 -1.475791e-03
7.597118e-02 7.557884e-03
7.597803e-02 -2.844333e-03
7.599695e-02 -1.359614e-03
7.602602e-02 -1.740487e-03
7.604705e-02 -2.883388e-03
7.604964e-02 -9.261261e-04
7.609172e-02 5.268815e-03
7.610121e-02 -7.744529e-04
7.611198e-02 2.670582e-04
7.615079e-02 1.945246e-03
7.616804e-02 9.729023e-05
7.620048e-02 5.706212e-05
7.621050e-02 8.056784e-04
7.621435e-02 -7.011375e-04
7.621666e-02 -1.832428e-03
7.622025e-02 -1.354046e-03
7.622256e-02 2.917089e-03
7.623498e-02 -4.753813e-04
7.624627e-02 -4.311297e-04
7.625227e-02 -1.643796e-03
7.627072e-02 3.840720e-04
7.627748e-02 -1.729832e-03
7.627892e-02 4.214084e-03
7.630007e-02 6.118158e-04
7.630253e-02 -2.233717e-03
7.630739e-02 -1.324634e-03
7.632224e-02 -3.576978e-03
7.634029e-02 -1.614266e-03
7.634272e-02 -2.534472e-03
7.634734e-02 -1.107054e-03
7.635427e-02 -5.865944e-03
7.636699e-02 6.085387e-03
7.636903e-02 -2.056065e-03
7.636966e-02 -7.706399e-04
7.637193e-02 -2.346081e-03
7.638062e-02 1.141817e-03
7.638468e-02 3.674955e-03
7.638680e-02 9.838025e-04
7.638777e-02 -2.755296e-03
7.639068e-02 -2.567793e-03
7.640417e-02 -1.210047e-04
7.643510e-02 2.097782e-03
7.643791e-02 2.768802e-03
7.646041e-02 -4.380176e-03
7.647600e-02 -1.959488e-03
7.647805e-02 2.470600e-03
7.647934e-02 8.358620e-04
7.648730e-02 6.021761e-04
7.651773e-02 9.840013e-04
7.652634e-02 -1.947824e-03
7.652969e-02 8.608578e-03
7.653727e-02 1.652683e-03
7.654352e-02 4.274630e-03
7.654817e-02 8.842186e-04
7.655346e-02 -1.269221e-03
7.655791e-02 -1.248882e-03
7.656026e-02 -1.992695e-03
7.657390e-02 -1.606101e-03
7.657490e-02 9.890209e-04
7.657698e-02 1.008897e-03
7.662174e-02 -4.310670e-04
7.663560e-02 9.631062e-04
7.665889e-02 8.095240e-04
7.666861e-02 -1.986852e-03
7.668164e-02 3.025530e-03
7.670336e-02 1.471826e-03
7.670989e-02 1.925324e-03
7.671193e-02 4.395208e-03
7.671416e-02 1.690164e-03
7.673595e-02 2.153113e-05
7.674512e-02 5.703272e-03
7.676282e-02 1.492314e-03
7.677589e-02 1.379352e-03
7.677772e-02 3.909868e-03
7.678480e-02 8.643980e-04
7.679932e-02 1.426725e-03
7.680583e-02 3.317947e-04
7.681037e-02 7.090664e-03
7.681575e-02 9.209244e-05
7.681609e-02 -5.877158e-04
7.683550e-02 -2.865928e-04
7.684575e-02 -8.466090e-04
7.684830e-02 -3.160960e-03
7.685387e-02 3.536052e-03
7.688262e-02 1.172203e-03
7.689126e-02 2.311565e-03
7.689130e-02 -4.749398e-04
7.689926e-02 5.463421e-03
7.689926e-02 5.463421e-03
7.689942e-02 -2.548409e-03
7.691630e-02 4.561733e-03
7.693754e-02 -2.885145e-03
7.694776e-02 -7.907661e-04
7.695761e-02 -3.773911e-03
7.698490e-02 5.459131e-04
7.699578e-02 7.027375e-04
7.700609e-02 -5.236130e-04
7.703624e-02 -9.284727e-04
7.706494e-02 9.885459e-05
7.707415e-02 -3.367254e-05
7.711281e-02 1.308497e-03
7.712796e-02 -8.554173e-04
7.713858e-02 -4.987935e-04
7.714173e-02 -6.852428e-04
7.715715e-02 4.891384e-04
7.715733e-02 -1.317578e-03
7.717967e-02 2.571955e-03
7.721494e-02 1.425578e-03
7.723094e-02 7.577761e-04
7.723791e-02 -8.793559e-04
7.724212e-02 -4.693293e-04
7.725070e-02 2.260805e-03
7.725448e-02 -1.246673e-03
7.726342e-02 -1.623118e-03
7.727213e-02 6.341491e-04
7.727538e-02 -6.851713e-04
7.728486e-02 1.992505e-03
7.729066e-02 8.145819e-04
7.729626e-02 5.572826e-04
7.730009e-02 -3.243911e-03
7.731257e-02 4.517891e-04
7.731321e-02 -5.676729e-04
7.731441e-02 -1.500865e-03
7.731887e-02 4.060985e-03
7.733592e-02 1.387413e-03
7.733946e-02 -1.515723e-03
7.734981e-02 -2.060955e-04
7.736599e-02 -1.676342e-03
7.739696e-02 -1.557823e-03
7.740664e-02 1.293593e-03
7.741391e-02 1.016692e-03
7.741556e-02 2.463411e-03
7.742316e-02 2.091293e-03
7.746603e-02 7.372934e-04
7.746762e-02 -3.139750e-03
7.746834e-02 -6.154673e-04
7.746934e-02 3.286241e-03
7.747657e-02 2.088121e-03
7.747657e-02 2.088121e-03
7.749330e-02 1.334652e-04
7.750861e-02 4.501500e-04
7.751829e-02 -4.837538e-03
7.752060e-02 -9.389169e-05
7.754688e-02 -6.277932e-04
7.757139e-02 3.435244e-04
7.757551e-02 -1.399976e-03
7.757942e-02 1.427789e-03
7.758257e-02 9.231922e-04
7.758268e-02 -3.084771e-03
7.758274e-02 1.568251e-03
7.758784e-02 1.876873e-03
7.759093e-02 3.760252e-03
7.760426e-02 -7.358979e-05
7.760889e-02 -1.309686e-03
7.762460e-02 9.800242e-04
7.762957e-02 1.072865e-03
7.764142e-02 1.463817e-03
7.765317e-02 -2.871081e-03
7.765724e-02 3.025975e-04
7.766065e-02 1.771442e-03
7.771001e-02 -1.423392e-04
7.771194e-02 3.236218e-03
7.771939e-02 -2.003585e-03
7.773023e-02 -3.585743e-04
7.773783e-02 3.758918e-03
7.774529e-02 1.461071e-03
7.774735e-02 -1.926960e-03
7.777195e-02 -4.883309e-04
7.777723e-02 2.045154e-03
7.778303e-02 2.904407e-03
7.778417e-02 2.448384e-05
7.779112e-02 3.542674e-04
7.781288e-02 4.358683e-03
7.781651e-02 -3.764774e-04
7.782848e-02 -3.186863e-03
7.783084e-02 2.573271e-03
7.783657e-02 1.279224e-03
7.783657e-02 1.279224e-03
7.784942e-02 -4.611235e-04
7.786157e-02 -2.039679e-03
7.787679e-02 1.035052e-05
7.788380e-02 -2.217474e-03
7.789741e-02 1.843695e-03
7.790147e-02 8.556613e-04
7.790914e-02 7.468522e-04
7.791949e-02 9.005612e-04
7.793274e-02 4.632147e-03
7.793279e-02 4.217851e-03
7.793461e-02 -3.144255e-04
7.794090e-02 5.699873e-04
7.794156e-02 -8.105449e-04
7.796174e-02 2.827690e-03
7.797077e-02 1.299475e-03
7.798744e-02 -7.447827e-04
7.799320e-02 8.637214e-04
7.801345e-02 -1.637930e-03
7.804626e-02 2.082603e-03
7.806513e-02 6.710259e-03
7.807109e-02 -1.253175e-03
7.809931e-02 1.377737e-03
7.810060e-02 1.471034e-03
7.811896e-02 -6.912369e-04
7.812017e-02 3.925036e-04
7.812017e-02 3.925036e-04
7.813698e-02 -1.050486e-03
7.814003e-02 6.996390e-04
7.816575e-02 -1.352068e-03
7.817608e-02 -6.810054e-04
7.819088e-02 -1.938755e-03
7.819405e-02 2.111465e-03
7.820729e-02 4.993658e-04
7.821041e-02 -2.318277e-03
7.821738e-02 -2.519814e-03
7.822652e-02 1.973464e-03
7.822652e-02 1.973464e-03
7.822890e-02 4.590348e-03
7.823308e-02 2.174199e-03
7.823896e-02 9.080158e-04
7.824337e-02 -2.146495e-03
7.824709e-02 -3.438297e-03
7.825032e-02 1.425306e-03
7.825916e-02 3.011246e-03
7.827823e-02 1.555677e-03
7.828925e-02 8.521591e-04
7.830767e-02 -3.098180e-03
7.831204e-02 -2.880516e-04
7.831796e-02 4.052689e-03
7.834642e-02 -1.982997e-03
7.834642e-02 -1.982997e-03
7.836055e-02 1.401650e-03
7.836540e-02 -1.777748e-03
7.836571e-02 -1.892431e-03
7.836864e-02 -1.442361e-03
7.837707e-02 -9.991842e-04
7.837773e-02 -9.292002e-04
7.839187e-02 7.211120e-04
7.840450e-02 7.075452e-03
7.840679e-02 -1.585866e-03
7.841942e-02 7.154588e-04
7.842353e-02 -3.047216e-05
7.843345e-02 9.640697e-04
7.844985e-02 -7.650779e-04
7.845416e-02 6.535824e-04
7.847408e-02 -3.789030e-04
7.849093e-02 1.903196e-03
7.850384e-02 1.250461e-03
7.852441e-02 3.911539e-04
7.853076e-02 -1.791299e-03
7.855571e-02 2.603963e-03
7.855793e-02 5.566400e-04
7.858956e-02 -2.395151e-03
7.860456e-02 4.187825e-03
7.860791e-02 -4.930547e-04
7.861203e-02 -3.906259e-03
7.863352e-02 1.811151e-03
7.863645e-02 4.275102e-04
7.864049e-02 -1.188347e-04
7.868093e-02 -1.620320e-03
7.868581e-02 1.789501e-06
7.869707e-02 5.748845e-05
7.870929e-02 1.611631e-04
7.870952e-02 1.105691e-03
7.871109e-02 -2.504527e-03
7.871465e-02 3.887348e-04
7.872840e-02 -1.159126e-03
7.872978e-02 -1.343947e-04
7.877151e-02 7.369974e-04
7.878802e-02 -3.017250e-04
7.879268e-02 -2.354728e-03
7.879268e-02 -2.354728e-03
7.879559e-02 -1.610712e-03
7.882162e-02 5.025806e-03
7.882211e-02 1.291581e-03
7.882724e-02 -1.787152e-03
7.882745e-02 4.236158e-04
7.882963e-02 -1.605163e-03
7.883320e-02 1.428814e-03
7.884860e-02 -2.043942e-03
7.886852e-02 -2.677857e-03
7.888911e-02 -9.958714e-04
7.890033e-02 -2.027741e-03
7.890674e-02 -3.343242e-03
7.893160e-02 -1.528258e-03
7.893710e-02 2.312336e-03
7.897911e-02 -2.159206e-03
7.898474e-02 5.795268e-03
7.899389e-02 -9.404588e-04
7.900228e-02 4.570033e-03
7.900643e-02 -4.068546e-06
7.900682e-02 1.384895e-04
7.901215e-02 -6.806555e-04
7.901928e-02 5.202857e-03
7.902006e-02 -7.572715e-04
7.902697e-02 7.587483e-04
7.904684e-02 -3.605100e-05
7.905061e-02 7.363442e-04
7.905617e-02 5.210242e-03
7.909216e-02 -9.354568e-04
7.914457e-02 4.073719e-03
7.914683e-02 -4.081911e-03
7.916254e-02 6.179397e-04
7.916426e-02 1.042730e-03
7.916671e-02 4.496812e-03
7.917254e-02 5.805347e-03
7.917724e-02 -3.337040e-04
7.919167e-02 -5.240783e-04
7.920759e-02 4.492677e-03
7.920770e-02 -2.503652e-04
7.920936e-02 -2.480613e-03
7.921528e-02 -2.388044e-04
7.922251e-02 1.753796e-03
7.922444e-02 1.617831e-04
7.923549e-02 -2.428978e-04
7.924210e-02 1.347714e-03
7.928104e-02 3.635168e-03
7.929053e-02 -6.317265e-04
7.929053e-02 -6.317265e-04
7.930169e-02 1.663266e-04
7.930362e-02 3.036402e-04
7.932580e-02 1.585488e-03
7.933727e-02 -1.172181e-03
7.933781e-02 4.206204e-03
7.934097e-02 1.328722e-03
7.935388e-02 1.153655e-03
7.935978e-02 -1.575134e-03
7.937356e-02 -2.279619e-04
7.937356e-02 -2.279619e-04
7.938359e-02 -5.831853e-04
7.939437e-02 9.071847e-04
7.939878e-02 7.108471e-03
7.940314e-02 -1.997740e-03
7.941706e-02 -1.342490e-03
7.943303e-02 -1.769387e-03
7.943905e-02 -1.837414e-03
7.943947e-02 1.542191e-03
7.944731e-02 5.064152e-04
7.945391e-02 8.574409e-04
7.945432e-02 -1.109718e-03
7.946189e-02 1.982813e-03
7.947220e-02 5.106868e-04
7.948006e-02 5.294716e-03
7.948237e-02 -1.767063e-03
7.950403e-02 3.501493e-03
7.951540e-02 -2.506751e-04
7.952577e-02 -2.610323e-04
7.954832e-02 2.354011e-03
7.955135e-02 3.382879e-04
7.957143e-02 1.581600e-03
7.957468e-02 5.810547e-04
7.959128e-02 -4.730432e-04
7.959431e-02 3.730003e-03
7.962466e-02 1.980155e-03
7.962657e-02 -1.106111e-03
7.964149e-02 -1.305120e-03
7.964396e-02 -3.060121e-03
7.966057e-02 9.055407e-04
7.966087e-02 -1.372330e-06
7.967002e-02 5.059443e-05
7.967210e-02 8.449225e-04
7.967604e-02 6.498928e-03
7.968355e-02 1.729225e-03
7.969388e-02 1.801935e-03
7.969514e-02 -1.996096e-03
7.969777e-02 -1.267304e-04
7.969781e-02 -1.433753e-03
7.971770e-02 -2.333700e-05
7.975936e-02 4.184460e-03
7.976306e-02 -1.196460e-03
7.976306e-02 -1.196460e-03
7.976666e-02 -2.685894e-03
7.977635e-02 -6.579723e-04
7.977736e-02 3.438862e-03
7.977765e-02 4.909508e-04
7.978755e-02 4.786883e-03
7.978981e-02 1.826305e-03
7.979122e-02 -4.769777e-04
7.979557e-02 -1.006550e-03
7.980189e-02 2.477585e-03
7.980351e-02 1.209994e-03
7.981289e-02 1.433612e-03
7.982078e-02 -1.251314e-04
7.982406e-02 6.649172e-03
7.982481e-02 6.688924e-04
7.982497e-02 1.045182e-03
7.983681e-02 -2.080888e-03
7.983868e-02 5.453946e-04
7.986017e-02 1.151974e-03
7.986834e-02 -3.709650e-04
7.987348e-02 4.466815e-04
7.987448e-02 7.617782e-04
7.988773e-02 2.418472e-03
7.989323e-02 -2.153481e-03
7.989407e-02 7.810875e-05
7.990408e-02 -3.809780e-03
7.990955e-02 -1.130265e-03
7.991222e-02 -1.959743e-03
7.991389e-02 3.469107e-03
7.991729e-02 7.926244e-04
7.992823e-02 2.314777e-03
7.992828e-02 -2.178966e-03
7.993713e-02 2.970153e-03
7.994006e-02 4.116126e-04
7.994544e-02 5.343042e-03
7.994581e-02 1.509710e-03
7.996314e-02 4.012530e-03
7.997281e-02 -9.584776e-05
7.997535e-02 1.076558e-03
7.998797e-02 -1.586072e-03
7.999091e-02 -1.502936e-03
7.999297e-02 1.624154e-03
8.000664e-02 7.629390e-04
8.002650e-02 5.310706e-04
8.002737e-02 3.726849e-03
8.003093e-02 9.103384e-04
8.006070e-02 1.420149e-03
8.007055e-02 -2.911001e-05
8.008503e-02 9.335218e-04
8.009772e-02 1.026618e-03
8.009942e-02 3.726381e-03
8.010888e-02 1.670752e-03
8.012399e-02 -4.804481e-04
8.014553e-02 -1.131515e-03
8.015081e-02 2.237363e-04
8.015695e-02 -8.606540e-05
8.019486e-02 -7.017109e-04
8.019802e-02 2.572607e-03
8.023538e-02 -2.325115e-03
8.024148e-02 3.546162e-03
8.024399e-02 2.768730e-03
8.025195e-02 4.624266e-03
8.027317e-02 -5.343374e-04
8.029922e-02 2.713252e-03
8.030484e-02 4.352634e-03
8.030953e-02 1.519809e-03
8.033764e-02 3.240886e-04
8.034548e-02 8.500960e-04
8.035188e-02 2.637435e-03
8.035188e-02 2.637435e-03
8.035620e-02 2.346796e-04
8.035801e-02 1.907747e-04
8.037734e-02 -1.446636e-03
8.038577e-02 1.894209e-03
8.038763e-02 2.446562e-03
8.040660e-02 -9.593701e-04
8.041704e-02 6.544942e-04
8.042250e-02 -2.640157e-03
8.042759e-02 -4.502398e-03
8.044475e-02 -1.662533e-03
8.044475e-02 -1.662533e-03
8.045179e-02 7.534740e-04
8.045853e-02 -3.990962e-04
8.045987e-02 -3.590688e-03
8.046997e-02 4.910583e-04
8.047901e-02 1.343235e-03
8.048105e-02 2.352480e-04
8.049745e-02 -3.925351e-03
8.049928e-02 -2.212313e-03
8.051242e-02 -5.635407e-04
8.053390e-02 1.357068e-03
8.054439e-02 1.015735e-03
8.054547e-02 5.180062e-03
8.055603e-02 3.362548e-03
8.056911e-02 -2.175709e-04
8.056946e-02 7.042103e-04
8.057106e-02 -8.143225e-04
8.057124e-02 5.677666e-04
8.057236e-02 -1.336770e-03
8.059825e-02 1.926679e-03
8.060146e-02 -5.537462e-05
8.061270e-02 -7.384788e-04
8.061333e-02 -1.153993e-04
8.061401e-02 -1.581233e-03
8.061785e-02 1.672283e-03
8.061786e-02 9.280433e-04
8.063705e-02 1.130997e-03
8.066308e-02 8.843071e-04
8.066964e-02 6.164046e-04
8.068237e-02 -9.647252e-04
8.068421e-02 -8.268794e-04
8.070290e-02 -7.079875e-04
8.070562e-02 -1.152634e-03
8.071136e-02 2.285949e-03
8.071891e-02 -7.005986e-04
8.072426e-02 -2.345299e-03
8.072717e-02 5.116197e-03
8.073282e-02 -1.127317e-03
8.073460e-02 -2.889303e-04
8.074247e-02 -1.210103e-03
8.074362e-02 1.605542e-03
8.074653e-02 -7.375796e-04
8.076006e-02 3.098857e-03
8.076816e-02 2.607549e-03
8.077284e-02 3.523813e-04
8.077795e-02 2.282991e-03
8.078370e-02 6.044740e-04
8.080448e-02 -4.106281e-04
8.081070e-02 -1.355538e-03
8.081622e-02 1.708744e-03
8.081622e-02 1.708744e-03
8.084139e-02 6.091243e-04
8.084849e-02 2.748489e-04
8.085407e-02 1.571691e-03
8.086317e-02 2.425566e-03
8.088789e-02 1.075956e-03
8.090042e-02 -1.373367e-03
8.092528e-02 2.021624e-03
8.093672e-02 -1.320212e-03
8.094847e-02 7.552155e-04
8.095121e-02 -4.102062e-04
8.096236e-02 1.542161e-03
8.096379e-02 3.776935e-03
8.096877e-02 5.510516e-04
8.098397e-02 -1.941297e-04
8.099637e-02 3.523467e-03
8.100824e-02 -9.457860e-04
8.101538e-02 1.105045e-03
8.102373e-02 -2.850201e-03
8.103537e-02 -1.345552e-03
8.105721e-02 -8.267238e-04
8.108738e-02 2.986139e-03
8.111712e-02 -7.702888e-04
8.111735e-02 -8.975469e-04
8.111735e-02 -8.975469e-04
8.111902e-02 -7.269625e-04
8.113115e-02 6.968185e-04
8.116560e-02 -8.072854e-04
8.116752e-02 -2.308643e-03
8.117057e-02 1.256531e-03
8.117091e-02 2.219141e-03
8.117240e-02 2.390024e-03
8.117592e-02 2.181686e-03
8.117592e-02 2.181686e-03
8.117965e-02 2.319951e-03
8.118300e-02 -4.692388e-04
8.118668e-02 1.166876e-03
8.119539e-02 -1.571383e-03
8.120100e-02 1.369148e-03
8.120456e-02 1.439354e-03
8.121939e-02 6.474951e-03
8.122984e-02 -1.031744e-03
8.126529e-02 2.348713e-03
8.126754e-02 3.089998e-03
8.127670e-02 1.526750e-03
8.127709e-02 2.432523e-03
8.128216e-02 -1.285655e-04
8.129409e-02 3.472415e-03
8.130084e-02 -1.774899e-03
8.130900e-02 8.526487e-04
8.131114e-02 1.368567e-03
8.131378e-02 -2.747164e-03
8.131422e-02 5.598686e-04
8.132136e-02 1.191066e-03
8.132161e-02 7.993648e-04
8.132827e-02 7.377825e-04
8.132870e-02 -2.539686e-03
8.132882e-02 -2.270823e-03
8.133124e-02 -3.263915e-03
8.134033e-02 -5.002110e-05
8.135396e-02 7.335210e-04
8.135418e-02 -1.024991e-03
8.135580e-02 1.260744e-03
8.136799e-02 3.613137e-03
8.137339e-02 8.383807e-04
8.139804e-02 1.675694e-03
8.142204e-02 -1.377648e-03
8.143437e-02 6.338941e-04
8.143699e-02 -1.528782e-03
8.144062e-02 4.174899e-03
8.144062e-02 4.174899e-03
8.145120e-02 -2.166716e-03
8.145213e-02 -7.879576e-05
8.145533e-02 8.257951e-04
8.145533e-02 8.257951e-04
8.145544e-02 2.610739e-04
8.145655e-02 1.641867e-03
8.146173e-02 -2.006102e-03
8.146173e-02 -2.006102e-03
8.147498e-02 3.367610e-04
8.149938e-02 3.127521e-03
8.149979e-02 1.007862e-03
8.151070e-02 4.435653e-03
8.151561e-02 -3.452587e-04
8.152021e-02 -2.902660e-04
8.152349e-02 5.419328e-04
8.155497e-02 -5.245390e-04
8.155706e-02 2.646688e-03
8.156148e-02 7.517524e-04
8.156580e-02 -1.418028e-03
8.158346e-02 4.599364e-03
8.158346e-02 4.599364e-03
8.158882e-02 -1.857022e-03
8.160470e-02 2.136362e-03
8.162247e-02 7.070418e-04
8.165903e-02 -1.769000e-03
8.166030e-02 -2.867632e-03
8.166402e-02 -2.104785e-03
8.167523e-02 -2.488048e-03
8.168030e-02 -4.463440e-03
8.169045e-02 6.191890e-03
8.169395e-02 1.962160e-03
8.169934e-02 -1.168436e-03
8.170161e-02 -8.226777e-04
8.170441e-02 2.721271e-03
8.171007e-02 -1.357923e-04
8.171839e-02 -1.303085e-03
8.172143e-02 -3.125619e-03
8.172228e-02 4.048205e-03
8.172789e-02 1.021436e-04
8.175935e-02 -1.638020e-03
8.176008e-02 -2.527437e-03
8.178504e-02 1.312581e-03
8.178903e-02 2.894528e-03
8.178953e-02 2.767810e-03
8.178953e-02 2.767810e-03
8.180127e-02 5.130942e-03
8.181631e-02 7.161597e-04
8.183727e-02 1.937847e-03
8.183889e-02 -1.366675e-03
8.184760e-02 4.206683e-03
8.185011e-02 4.162215e-04
8.186694e-02 6.869142e-04
8.191908e-02 6.818292e-04
8.191953e-02 6.249192e-04
8.195846e-02 1.836504e-03
8.196151e-02 -2.772806e-03
8.197770e-02 1.070998e-03
8.198887e-02 1.219925e-03
8.199806e-02 1.391777e-03
8.202093e-02 -1.451929e-04
8.203191e-02 -8.765780e-04
8.203755e-02 -2.631761e-03
8.203979e-02 -4.814365e-04
8.206073e-02 -2.219509e-06
8.206992e-02 -1.395933e-03
8.207619e-02 1.174866e-03
8.209463e-02 4.438275e-03
8.210320e-02 1.028184e-04
8.210320e-02 1.028184e-04
8.210640e-02 6.526059e-04
8.212314e-02 1.702705e-04
8.212675e-02 2.253062e-03
8.213227e-02 2.846413e-03
8.214010e-02 7.882551e-04
8.214994e-02 -1.061456e-03
8.215086e-02 5.597357e-03
8.215086e-02 5.597357e-03
8.215387e-02 -1.668020e-03
8.216626e-02 1.076924e-04
8.218556e-02 6.807928e-04
8.218832e-02 -2.171735e-03
8.219456e-02 -1.257748e-03
8.219874e-02 -3.078351e-05
8.222651e-02 4.661341e-03
8.223613e-02 2.541017e-03
8.226229e-02 -2.052379e-03
8.226508e-02 1.629588e-03
8.227158e-02 1.412250e-03
8.228454e-02 -1.489359e-03
8.228780e-02 7.276936e-04
8.229662e-02 2.530127e-03
8.230423e-02 -1.947038e-03
8.230500e-02 6.482929e-03
8.231629e-02 9.759445e-04
8.232956e-02 2.445151e-03
8.234472e-02 -1.450926e-03
8.234472e-02 -1.450926e-03
8.235696e-02 -7.261819e-04
8.236691e-02 5.420027e-04
8.238277e-02 -9.915377e-04
8.242197e-02 3.145304e-03
8.244081e-02 -1.976576e-04
8.246155e-02 1.929520e-04
8.246671e-02 -3.276984e-04
8.246680e-02 4.215355e-03
8.247827e-02 -9.116233e-04
8.249896e-02 6.127091e-03
8.250699e-02 -2.699654e-04
8.250846e-02 3.595352e-03
8.251358e-02 -3.588573e-04
8.252026e-02 -7.163146e-04
8.252901e-02 -2.298038e-04
8.254000e-02 7.154313e-04
8.254274e-02 1.376932e-03
8.254498e-02 -3.038136e-03
8.254600e-02 -1.844594e-03
8.255032e-02 3.359469e-03
8.255417e-02 -1.920802e-03
8.256728e-02 5.034261e-03
8.260621e-02 2.427322e-05
8.260621e-02 2.427322e-05
8.261411e-02 8.408799e-05
8.262566e-02 -2.873407e-03
8.264115e-02 -1.012012e-03
8.264213e-02 1.955867e-03
8.264927e-02 1.055985e-03
8.265106e-02 1.224276e-03
8.265170e-02 1.753829e-03
8.267830e-02 1.418493e-03
8.268876e-02 -7.336863e-04
8.269421e-02 8.998206e-05
8.269498e-02 -1.113792e-03
8.270884e-02 -1.416229e-03
8.273993e-02 8.148664e-03
8.273993e-02 8.148664e-03
8.274047e-02 -2.521194e-03
8.274820e-02 -1.603454e-03
8.274914e-02 -3.388808e-03
8.275895e-02 3.121119e-03
8.275895e-02 3.121119e-03
8.276788e-02 1.287619e-03
8.279141e-02 -6.589081e-04
8.279180e-02 -8.404664e-04
8.279914e-02 2.864146e-03
8.282346e-02 2.792321e-03
8.284758e-02 -1.226721e-03
8.285113e-02 -1.137946e-03
8.285486e-02 1.431245e-04
8.285593e-02 1.965386e-04
8.285878e-02 2.634554e-04
8.286365e-02 3.951164e-04
8.288589e-02 -4.330672e-03
8.288788e-02 1.175077e-03
8.292947e-02 3.843218e-03
8.292947e-02 3.843218e-03
8.293481e-02 -8.673376e-04
8.296540e-02 3.977302e-04
8.296552e-02 -9.001694e-04
8.296990e-02 -1.055213e-03
8.298847e-02 8.455970e-04
8.301966e-02 4.113837e-03
8.302550e-02 8.109505e-04
8.302648e-02 3.301493e-04
8.304264e-02 -2.929270e-03
8.308296e-02 -8.951804e-04
8.308976e-02 -2.212332e-03
8.309020e-02 -3.014420e-04
8.310762e-02 -2.924296e-03
8.311689e-02 -1.290354e-04
8.312116e-02 -1.573194e-03
8.313311e-02 1.398140e-03
8.314270e-02 -9.543092e-04
8.314704e-02 -2.208112e-04
8.315883e-02 2.229243e-03
8.316799e-02 -1.755474e-03
8.317588e-02 -6.935663e-04
8.318084e-02 1.528163e-03
8.319300e-02 1.225073e-03
8.319703e-02 -1.561424e-03
8.321606e-02 3.459722e-04
8.322673e-02 4.725787e-03
8.324099e-02 -1.667297e-04
8.324412e-02 3.835907e-03
8.325452e-02 -1.503115e-03
8.325722e-02 -4.316945e-03
8.326072e-02 3.184262e-06
8.327091e-02 -2.654515e-03
8.327592e-02 2.339251e-03
8.327768e-02 1.778148e-03
8.328047e-02 2.443074e-03
8.328141e-02 -3.620756e-03
8.328945e-02 2.040529e-03
8.329091e-02 6.189967e-03
8.329168e-02 1.386434e-03
8.331369e-02 1.680708e-03
8.331980e-02 3.787280e-04
8.332005e-02 -1.871061e-03
8.333987e-02 3.490821e-04
8.334437e-02 3.184686e-03
8.335188e-02 -1.975989e-03
8.336856e-02 9.567518e-04
8.338990e-02 -1.296859e-03
8.340348e-02 1.071720e-03
8.340614e-02 4.176333e-03
8.341091e-02 3.732217e-03
8.341928e-02 -3.858796e-03
8.342043e-02 6.067770e-03
8.342043e-02 6.067770e-03
8.343586e-02 -1.410645e-03
8.343895e-02 -1.630015e-03
8.344622e-02 -1.068247e-03
8.346692e-02 -2.148510e-03
8.348796e-02 1.267533e-03
8.350196e-02 -4.966596e-03
8.350490e-02 1.189994e-03
8.350825e-02 -1.048753e-03
8.351390e-02 1.118411e-03
8.352276e-02 -1.048764e-03
8.352482e-02 -9.268495e-04
8.354094e-02 -1.225323e-03
8.354421e-02 -2.487371e-03
8.355989e-02 3.228467e-03
8.356290e-02 1.795880e-03
8.357472e-02 3.329831e-03
8.358763e-02 3.433253e-04
8.358890e-02 -6.053038e-04
8.358928e-02 2.906612e-03
8.359070e-02 -2.810701e-03
8.363334e-02 -9.513332e-04
8.363517e-02 -8.786797e-04
8.364027e-02 8.655808e-04
8.364048e-02 -1.509205e-04
8.365031e-02 2.995751e-03
8.365156e-02 1.203020e-03
8.366330e-02 -9.190003e-04
8.368275e-02 5.074811e-05
8.369066e-02 -1.948445e-03
8.370926e-02 7.945621e-04
8.371260e-02 7.320264e-04
8.371552e-02 5.957603e-03
8.374745e-02 6.591911e-04
8.375531e-02 3.230814e-03
8.375599e-02 4.161606e-05
8.375995e-02 6.045737e-03
8.377147e-02 9.257631e-04
8.378220e-02 9.189944e-04
8.379277e-02 2.436875e-04
8.379889e-02 5.525563e-04
8.379926e-02 -1.143491e-03
8.380714e-02 -2.487293e-03
8.382944e-02 -4.637091e-04
8.383464e-02 2.480970e-03
8.384239e-02 -3.095824e-04
8.385012e-02 2.165071e-03
8.385885e-02 3.264932e-03
8.386045e-02 2.129577e-03
8.386106e-02 -1.142868e-03
8.386116e-02 -2.006201e-03
8.386297e-02 1.377329e-03
8.387915e-02 5.730002e-04
8.390521e-02 4.646027e-05
8.391022e-02 2.875169e-03
8.391121e-02 -4.887461e-04
8.391272e-02 4.635565e-03
8.393408e-02 3.419099e-04
8.395251e-02 -4.861748e-04
8.397506e-02 4.682289e-04
8.399296e-02 3.777894e-03
8.399805e-02 -6.732330e-04
8.400149e-02 -4.516059e-03
8.400236e-02 5.546774e-03
8.400862e-02 -3.472059e-04
8.401445e-02 1.515039e-03
8.401630e-02 5.796567e-04
8.402310e-02 2.955580e-03
8.404816e-02 -2.242181e-03
8.406032e-02 7.272381e-04
8.407240e-02 1.789472e-03
8.408488e-02 2.117601e-03
8.410935e-02 1.058404e-03
8.411351e-02 -3.783222e-03
8.412789e-02 9.199330e-03
8.415522e-02 7.484365e-04
8.415892e-02 8.206390e-03
8.417097e-02 1.764649e-03
8.419209e-02 -6.430535e-03
8.419671e-02 8.694903e-03
8.419930e-02 2.134349e-03
8.420232e-02 9.593059e-04
8.420393e-02 -2.692786e-04
8.420828e-02 -1.288243e-03
8.421373e-02 3.671492e-05
8.421492e-02 -2.324894e-04
8.421513e-02 2.029612e-03
8.421659e-02 -1.797254e-03
8.421659e-02 -1.797254e-03
8.422534e-02 7.569552e-03
8.424534e-02 4.065217e-03
8.424546e-02 2.708260e-03
8.425228e-02 -1.503566e-03
8.425563e-02 -1.548777e-04
8.426126e-02 1.148903e-03
8.426306e-02 8.329256e-04
8.427610e-02 4.372363e-03
8.427976e-02 1.371545e-03
8.429200e-02 1.314819e-03
8.429451e-02 2.316483e-03
8.429526e-02 -1.556738e-03
8.431043e-02 -1.553095e-03
8.434599e-02 -3.981806e-04
8.434764e-02 -2.248114e-03
8.434764e-02 -2.248114e-03
8.434822e-02 8.734257e-04
8.435069e-02 2.522368e-03
8.435646e-02 -3.197392e-04
8.437673e-02 4.907717e-03
8.439525e-02 -1.210357e-03
8.439612e-02 1.178650e-03
8.440189e-02 7.518914e-04
8.442711e-02 1.268318e-03
8.442868e-02 -2.681511e-03
8.444167e-02 3.745961e-04
8.445250e-02 4.947786e-04
8.446936e-02 -1.661340e-03
8.447719e-02 1.504001e-03
8.448298e-02 5.606688e-04
8.448352e-02 8.634758e-04
8.448761e-02 5.947273e-04
8.448968e-02 6.264960e-04
8.449101e-02 -1.414349e-03
8.449472e-02 1.242323e-03
8.449689e-02 -2.816398e-03
8.449924e-02 6.588032e-03
8.451449e-02 -1.938041e-03
8.451593e-02 -1.869777e-03
8.452360e-02 -2.052421e-03
8.452659e-02 1.683907e-03
8.452734e-02 6.292909e-04
8.453072e-02 5.619318e-04
8.455055e-02 -2.271204e-04
8.455693e-02 -4.514004e-04
8.456174e-02 1.971464e-03
8.456245e-02 1.893364e-03
8.456680e-02 3.654025e-03
8.457087e-02 1.780570e-03
8.457868e-02 3.176484e-03
8.458700e-02 -8.388030e-04
8.460664e-02 1.187573e-03
8.461413e-02 -1.399698e-03
8.464059e-02 -1.774045e-03
8.464528e-02 -1.461267e-03
8.465129e-02 -5.479075e-04
8.466321e-02 1.048384e-03
8.468916e-02 2.868745e-03
8.469556e-02 -9.029139e-04
8.469705e-02 -3.150504e-04
8.470123e-02 -7.069168e-04
8.472348e-02 -7.591883e-05
8.472486e-02 4.712132e-03
8.475278e-02 2.569376e-03
8.476556e-02 8.240571e-03
8.476839e-02 9.904094e-04
8.477411e-02 -2.951792e-05
8.479796e-02 2.508981e-03
8.479808e-02 2.499229e-03
8.480788e-02 5.896008e-04
8.481660e-02 1.965523e-03
8.481712e-02 -2.686940e-03
8.483321e-02 -1.670651e-03
8.483732e-02 -1.996614e-03
8.484940e-02 -4.984822e-04
8.486014e-02 -1.786878e-03
8.487114e-02 1.223222e-03
8.488157e-02 -1.102299e-03
8.489118e-02 7.377714e-04
8.489446e-02 -2.805967e-03
8.489663e-02 2.608214e-03
8.489886e-02 6.018682e-04
8.490424e-02 -2.859107e-04
8.490726e-02 8.669491e-04
8.491893e-02 2.401030e-03
8.492632e-02 8.416641e-04
8.493216e-02 -4.314023e-04
8.493800e-02 1.656346e-03
8.495102e-02 4.439391e-04
8.495118e-02 -2.078283e-03
8.495331e-02 -2.771791e-04
8.496693e-02 -1.965290e-03
8.496915e-02 -1.189338e-03
8.499381e-02 1.392986e-03
8.500103e-02 -5.421280e-04
8.501778e-02 -7.419870e-05
8.503042e-02 -4.923121e-03
8.503767e-02 -6.292820e-04
8.503767e-02 -6.292820e-04
8.505308e-02 -1.074245e-03
8.505380e-02 1.390942e-03
8.505463e-02 -1.770499e-03
8.507431e-02 -1.044112e-03
8.507573e-02 -6.636319e-04
8.508633e-02 6.164703e-03
8.508914e-02 -1.933419e-03
8.510116e-02 4.732271e-04
8.510753e-02 1.811194e-03
8.511365e-02 -1.335358e-03
8.512055e-02 1.777474e-03
8.513448e-02 3.133142e-03
8.513905e-02 -2.184730e-04
8.514469e-02 -1.261857e-03
8.517000e-02 2.192636e-03
8.518007e-02 -1.101620e-03
8.518075e-02 4.149374e-03
8.518075e-02 4.149374e-03
8.518828e-02 -6.193133e-04
8.519129e-02 -2.051771e-03
8.520102e-02 1.755263e-03
8.520886e-02 -5.091606e-04
8.521421e-02 3.592180e-04
8.521582e-02 -3.332977e-03
8.522498e-02 -1.550974e-03
8.522736e-02 -8.769238e-05
8.523165e-02 -3.915183e-03
8.524926e-02 -1.584141e-04
8.526516e-02 -1.355362e-03
8.527202e-02 2.592668e-03
8.527518e-02 -1.105955e-03
8.527958e-02 2.233457e-03
8.529509e-02 1.818318e-03
8.529509e-02 1.818318e-03
8.530542e-02 2.215470e-03
8.531114e-02 8.479600e-04
8.531669e-02 -2.541895e-04
8.534027e-02 -1.317255e-03
8.534810e-02 3.581461e-04
8.535004e-02 7.848741e-03
8.536275e-02 -1.102526e-04
8.536551e-02 1.291289e-03
8.539492e-02 1.748909e-03
8.539712e-02 8.396375e-04
8.540868e-02 -5.795478e-04
8.541297e-02 4.348710e-04
8.543885e-02 -1.552587e-03
8.543902e-02 -1.283833e-03
8.545031e-02 8.546666e-04
8.545201e-02 6.704140e-03
8.545634e-02 1.206740e-03
8.548451e-02 1.265372e-04
8.548687e-02 -2.400368e-03
8.548719e-02 8.699210e-03
8.550811e-02 -2.634539e-04
8.551515e-02 1.571998e-03
8.551623e-02 -4.641592e-03
8.551952e-02 -2.758698e-03
8.551952e-02 -2.758698e-03
8.554042e-02 -5.212649e-04
8.554591e-02 1.186208e-03
8.555095e-02 7.914534e-04
8.555399e-02 1.700887e-03
8.555464e-02 2.794047e-03
8.555968e-02 8.022719e-04
8.558152e-02 -1.934118e-03
8.558479e-02 -1.624510e-03
8.558531e-02 1.085615e-03
8.559248e-02 -1.970693e-03
8.559674e-02 -1.173374e-03
8.560516e-02 1.186992e-03
8.561053e-02 1.423614e-03
8.561199e-02 6.500513e-04
8.562475e-02 2.096505e-03
8.563549e-02 -8.889049e-04
8.563716e-02 -2.445237e-04
8.564347e-02 3.694173e-04
8.565276e-02 7.805757e-04
8.565863e-02 -1.573671e-03
8.566054e-02 -4.479182e-04
8.566114e-02 5.318265e-04
8.566638e-02 3.970309e-04
8.567194e-02 1.155710e-03
8.568969e-02 -1.363399e-03
8.569327e-02 1.183775e-03
8.570235e-02 2.019028e-03
8.570235e-02 2.019028e-03
8.571092e-02 2.548715e-03
8.571503e-02 -4.309603e-05
8.572838e-02 6.678566e-04
8.573905e-02 1.693736e-03
8.575211e-02 -1.678282e-03
8.575826e-02 -1.498732e-03
8.576897e-02 -2.074807e-03
8.577257e-02 5.670558e-04
8.579660e-02 6.313458e-03
8.580542e-02 1.346325e-03
8.580580e-02 2.676418e-03
8.581163e-02 1.518463e-03
8.582030e-02 -8.187153e-04
8.584069e-02 -7.875328e-04
8.584340e-02 -5.050625e-03
8.584536e-02 6.793398e-03
8.585246e-02 2.231630e-04
8.586010e-02 2.834136e-03
8.586365e-02 4.836023e-04
8.586401e-02 3.797256e-03
8.586701e-02 3.962450e-03
8.591836e-02 1.472316e-04
8.595323e-02 3.431339e-03
8.595333e-02 -1.798077e-05
8.595781e-02 -2.091628e-03
8.596259e-02 -1.509856e-03
8.596294e-02 -1.242898e-03
8.596643e-02 1.557245e-03
8.596818e-02 -1.937589e-03
8.598390e-02 -5.048211e-04
8.599109e-02 -1.560005e-03
8.599742e-02 1.434794e-03
8.603290e-02 1.167133e-03
8.603914e-02 -2.631835e-03
8.604769e-02 4.244087e-03
8.604855e-02 1.158120e-03
8.604873e-02 1.816974e-03
8.606009e-02 -3.250150e-03
8.607991e-02 1.525684e-03
8.607991e-02 1.525684e-03
8.608588e-02 7.118636e-04
8.608679e-02 -1.969655e-03
8.610035e-02 2.340015e-03
8.610502e-02 2.402287e-04
8.610613e-02 3.518192e-04
8.611107e-02 5.950593e-04
8.611883e-02 2.215064e-03
8.612059e-02 2.293742e-03
8.614321e-02 -2.507966e-04
8.616207e-02 1.235710e-03
8.617292e-02 7.704208e-03
8.619618e-02 -8.006765e-04
8.622397e-02 -3.974290e-03
8.623035e-02 4.432433e-04
8.623489e-02 8.253418e-04
8.624123e-02 7.462492e-03
8.624264e-02 5.998814e-04
8.624966e-02 -1.859709e-03
8.625609e-02 1.027829e-04
8.627657e-02 1.487176e-03
8.628027e-02 -1.755476e-03
8.628250e-02 4.750588e-04
8.628731e-02 6.370261e-03
8.630453e-02 -9.437122e-04
8.630776e-02 1.567019e-03
8.630809e-02 4.863447e-04
8.630898e-02 -9.969117e-04
8.631448e-02 5.145044e-03
8.631839e-02 -1.509504e-03
8.631927e-02 5.948736e-04
8.632384e-02 1.292923e-03
8.633245e-02 -1.985835e-03
8.634675e-02 -1.278528e-03
8.638498e-02 8.696675e-04
8.643967e-02 -9.550261e-05
8.644010e-02 -5.627476e-04
8.645743e-02 4.818108e-05
8.648479e-02 -7.192242e-04
8.649296e-02 2.501696e-04
8.649321e-02 1.770836e-03
8.649657e-02 1.254807e-03
8.650626e-02 -1.560441e-03
8.652037e-02 -9.507637e-04
8.657146e-02 2.073790e-03
8.659902e-02 1.399259e-03
8.661070e-02 1.472198e-03
8.661425e-02 2.966610e-03
8.662090e-02 5.076599e-03
8.662200e-02 4.295847e-04
8.664010e-02 -7.486292e-04
8.664042e-02 -3.248106e-03
8.664674e-02 8.203983e-04
8.666446e-02 3.399805e-03
8.667136e-02 1.619224e-03
8.669252e-02 -1.264290e-03
8.670671e-02 1.977624e-03
8.671573e-02 1.535752e-04
8.671573e-02 1.535752e-04
8.671882e-02 -1.636003e-03
8.673377e-02 -3.224668e-04
8.673645e-02 -1.470498e-03
8.673675e-02 -1.265284e-03
8.673675e-02 -1.265284e-03
8.674056e-02 2.052197e-04
8.674115e-02 1.744072e-03
8.675873e-02 -1.668408e-03
8.676205e-02 8.381818e-03
8.676802e-02 -1.216129e-03
8.681630e-02 -8.664100e-04
8.681686e-02 1.880674e-03
8.682445e-02 -1.554505e-03
8.683385e-02 -2.019686e-03
8.684249e-02 -4.981495e-04
8.686260e-02 4.979192e-04
8.686766e-02 -2.628657e-03
8.686817e-02 4.048264e-04
8.687238e-02 -2.784010e-03
8.688314e-02 5.166241e-03
8.691229e-02 2.661003e-03
8.692268e-02 1.152901e-03
8.693626e-02 4.401592e-03
8.693868e-02 -2.707187e-04
8.693868e-02 -2.707187e-04
8.695766e-02 -9.159350e-05
8.697600e-02 -1.114560e-03
8.699259e-02 8.895641e-04
8.700811e-02 -1.302652e-03
8.701453e-02 2.595929e-03
8.702786e-02 -2.134543e-03
8.703038e-02 5.639563e-03
8.703046e-02 -2.363926e-03
8.703630e-02 3.733129e-03
8.703677e-02 9.542650e-04
8.703788e-02 -2.294034e-04
8.704547e-02 -1.511619e-03
8.706529e-02 -9.350772e-04
8.706825e-02 2.884128e-04
8.708458e-02 8.547835e-04
8.710360e-02 -1.576964e-03
8.711049e-02 -1.630829e-03
8.711563e-02 7.631644e-04
8.711627e-02 3.065913e-05
8.711627e-02 3.065913e-05
8.711888e-02 -2.233933e-03
8.712365e-02 -1.114099e-03
8.712454e-02 3.319057e-03
8.713533e-02 8.058022e-04
8.714485e-02 7.724204e-04
8.714653e-02 6.946776e-04
8.714759e-02 1.044918e-03
8.715504e-02 -1.778547e-03
8.715881e-02 -3.372479e-03
8.716221e-02 9.246382e-04
8.719414e-02 -1.574947e-03
8.719720e-02 -2.170593e-04
8.721055e-02 8.318499e-04
8.722477e-02 -6.631466e-04
8.722990e-02 -1.106090e-03
8.724403e-02 -8.453509e-04
8.724672e-02 6.550871e-04
8.724841e-02 5.019970e-04
8.725213e-02 -1.280320e-03
8.726061e-02 1.232299e-03
8.726443e-02 -1.342678e-03
8.727773e-02 1.762918e-03
8.728649e-02 -8.286758e-04
8.729449e-02 -1.923901e-03
8.729784e-02 3.867214e-04
8.730269e-02 8.391549e-04
8.730375e-02 -2.230389e-04
8.730732e-02 3.203770e-03
8.730901e-02 1.250459e-03
8.731919e-02 4.891650e-04
8.733257e-02 1.807295e-03
8.733624e-02 1.281973e-03
8.734463e-02 -1.683631e-03
8.735176e-02 -1.768969e-03
8.735177e-02 1.816379e-03
8.738149e-02 1.741014e-03
8.739029e-02 -3.814001e-04
8.739542e-02 2.283254e-03
8.739699e-02 -1.688932e-03
8.740803e-02 1.280109e-03
8.741766e-02 2.693651e-03
8.743319e-02 6.232932e-04
8.744989e-02 9.471418e-03
8.745859e-02 -3.436156e-03
8.747230e-02 7.325780e-04
8.747282e-02 -1.729429e-03
8.747512e-02 -2.580636e-03
8.748716e-02 -3.141548e-03
8.748728e-02 -2.830437e-03
8.749506e-02 1.276882e-03
8.749755e-02 2.345236e-04
8.750903e-02 1.295176e-03
8.753288e-02 4.086483e-03
8.754313e-02 -2.488587e-03
8.754595e-02 1.462750e-03
8.754832e-02 -3.429194e-03
8.754838e-02 -1.174594e-03
8.756415e-02 -1.738526e-03
8.757317e-02 -2.194309e-04
8.757825e-02 -1.633489e-03
8.759762e-02 4.733735e-04
8.759972e-02 3.293642e-03
8.760155e-02 -4.823563e-04
8.760866e-02 -1.116359e-03
8.760889e-02 -2.241700e-03
8.761257e-02 1.186016e-03
8.761435e-02 4.585758e-04
8.763191e-02 1.846944e-03
8.764338e-02 -6.045847e-04
8.764585e-02 1.684710e-03
8.764585e-02 1.684710e-03
8.765033e-02 2.769547e-04
8.765397e-02 4.201094e-05
8.767141e-02 8.540953e-04
8.767879e-02 6.575908e-04
8.768429e-02 7.452905e-04
8.769659e-02 -1.472542e-03
8.771112e-02 1.117336e-03
8.771575e-02 3.844283e-03
8.773358e-02 1.663010e-03
8.776447e-02 -1.702048e-03
8.776610e-02 -1.068940e-03
8.778345e-02 -4.542092e-04
8.778867e-02 -6.958395e-04
8.778986e-02 1.440944e-03
8.779142e-02 1.195349e-04
8.780737e-02 -9.570035e-04
8.781370e-02 5.971052e-04
8.782455e-02 -1.473717e-04
8.783332e-02 6.235294e-04
8.787077e-02 -3.418520e-04
8.788898e-02 -3.206514e-03
8.788898e-02 -3.206514e-03
8.790275e-02 4.301248e-04
8.790781e-02 -6.987124e-04
8.792579e-02 2.281751e-03
8.793401e-02 2.888482e-03
8.794797e-02 3.134810e-04
8.796464e-02 2.456578e-03
8.797401e-02 2.087104e-04
8.798745e-02 -9.759702e-04
8.805186e-02 4.234258e-03
8.805186e-02 4.234258e-03
8.805661e-02 9.888899e-04
8.806484e-02 3.484498e-03
8.807374e-02 -2.768559e-03
8.810078e-02 1.614648e-03
8.810647e-02 -1.784093e-03
8.811660e-02 2.102477e-03
8.811660e-02 2.102477e-03
8.814238e-02 2.324011e-03
8.814745e-02 1.077196e-03
8.814911e-02 3.761875e-03
8.814934e-02 1.746221e-03
8.815757e-02 7.309755e-04
8.815868e-02 -1.119899e-03
8.818700e-02 -1.765449e-03
8.818700e-02 -1.765449e-03
8.819533e-02 1.354065e-04
8.820211e-02 -1.037040e-03
8.820875e-02 7.970025e-03
8.821258e-02 1.174624e-03
8.822061e-02 1.511988e-03
8.822424e-02 -2.423932e-03
8.822499e-02 1.465348e-03
8.823184e-02 -1.851996e-03
8.827389e-02 2.301589e-04
8.827389e-02 2.301589e-04
8.827570e-02 -2.033760e-03
8.827759e-02 6.579982e-03
8.828085e-02 -1.293347e-03
8.829824e-02 1.495070e-03
8.830475e-02 1.530945e-04
8.830523e-02 2.380719e-03
8.831784e-02 -8.210137e-04
8.833335e-02 -3.006023e-03
8.836595e-02 -9.802311e-04
8.836920e-02 4.697996e-04
8.836920e-02 4.697996e-04
8.838627e-02 -1.785499e-04
8.839192e-02 1.257223e-03
8.839475e-02 -3.152840e-03
8.839959e-02 1.447630e-03
8.840143e-02 -2.075590e-03
8.840890e-02 -1.051618e-03
8.840934e-02 -1.358398e-03
8.841858e-02 1.196709e-03
8.847536e-02 2.421557e-03
8.847946e-02 -6.618472e-05
8.849703e-02 -2.541979e-03
8.849711e-02 4.329892e-04
8.849711e-02 4.329892e-04
8.852838e-02 4.467719e-03
8.852960e-02 5.250189e-03
8.853396e-02 1.569465e-03
8.853654e-02 -1.644833e-03
8.853781e-02 8.813248e-04
8.855645e-02 -1.858820e-03
8.856148e-02 5.107729e-04
8.857074e-02 1.031199e-03
8.858237e-02 -3.125596e-03
8.858800e-02 1.157689e-03
8.859207e-02 1.502566e-03
8.860063e-02 7.647423e-04
8.863121e-02 6.183182e-03
8.863868e-02 4.838268e-04
8.864245e-02 3.953294e-03
8.869756e-02 -1.742084e-03
8.870110e-02 2.932588e-03
8.870188e-02 -2.286630e-04
8.870739e-02 2.727907e-04
8.871521e-02 2.073504e-03
8.871649e-02 -2.742800e-03
8.872339e-02 -1.789866e-03
8.872465e-02 2.874728e-03
8.873066e-02 -6.724252e-05
8.874496e-02 -1.076060e-03
8.875466e-02 -5.112975e-04
8.879457e-02 -9.523913e-04
8.879501e-02 3.738690e-05
8.880230e-02 -6.652528e-04
8.880413e-02 4.739705e-04
8.880413e-02 3.073590e-03
8.880414e-02 4.708210e-04
8.880847e-02 3.131217e-03
8.880909e-02 -1.860410e-03
8.881974e-02 -1.033464e-03
8.882847e-02 4.108083e-03
8.883147e-02 6.102942e-04
8.883380e-02 6.341374e-04
8.883728e-02 -6.174137e-04
8.884122e-02 8.014385e-04
8.884537e-02 5.589320e-03
8.885064e-02 -3.277975e-04
8.885382e-02 6.499317e-03
8.885590e-02 -1.424053e-03
8.886198e-02 2.537985e-03
8.886286e-02 -1.748620e-03
8.888455e-02 6.762434e-04
8.889935e-02 -6.156173e-04
8.890027e-02 -5.952806e-04
8.892671e-02 -1.301352e-03
8.893829e-02 -4.515138e-03
8.893918e-02 -4.550909e-04
8.895379e-02 1.557259e-03
8.896015e-02 2.483208e-04
8.896912e-02 8.863521e-04
8.897572e-02 -7.278767e-04
8.897858e-02 1.501377e-03
8.897903e-02 6.323734e-04
8.898447e-02 5.583045e-04
8.899666e-02 -1.423976e-03
8.899867e-02 -2.708142e-03
8.900573e-02 1.670350e-03
8.901144e-02 2.506846e-03
8.902364e-02 1.414830e-03
8.904036e-02 -9.522963e-04
8.905706e-02 -1.863890e-03
8.906342e-02 -1.572646e-03
8.907638e-02 1.271748e-03
8.908466e-02 -1.426056e-03
8.908939e-02 3.500454e-03
8.911045e-02 -3.444463e-04
8.911568e-02 3.088857e-03
8.912049e-02 1.133269e-03
8.912893e-02 5.733319e-05
8.913327e-02 4.224557e-03
8.913406e-02 -1.067198e-03
8.913541e-02 9.086017e-04
8.914997e-02 4.627427e-03
8.916576e-02 -1.299518e-03
8.917053e-02 -2.047092e-03
8.917210e-02 5.441475e-03
8.917218e-02 -1.894120e-03
8.918644e-02 8.639060e-04
8.918866e-02 1.885046e-03
8.919535e-02 -6.352575e-04
8.919735e-02 -2.548070e-04
8.919753e-02 1.613420e-03
8.920570e-02 1.748479e-03
8.920621e-02 -2.906614e-04
8.922329e-02 7.856131e-03
8.922825e-02 -7.650053e-04
8.926970e-02 1.606001e-03
8.928033e-02 -1.334821e-03
8.928192e-02 -2.211784e-03
8.928277e-02 2.554251e-03
8.928737e-02 1.541548e-03
8.929360e-02 1.445771e-03
8.929948e-02 2.546668e-03
8.930142e-02 2.996189e-03
8.934237e-02 -2.507228e-04
8.935345e-02 2.812364e-06
8.935552e-02 -1.506083e-04
8.937329e-02 5.093899e-04
8.937783e-02 2.043853e-03
8.938760e-02 -9.259533e-04
8.939451e-02 -1.150508e-03
8.939543e-02 -1.849164e-03
8.939726e-02 3.551979e-03
8.940660e-02 2.789674e-03
8.942382e-02 2.087304e-03
8.942862e-02 -1.029299e-03
8.942947e-02 -8.866832e-04
8.943553e-02 -3.211213e-04
8.944608e-02 7.781076e-05
8.945014e-02 -1.576352e-03
8.945701e-02 -5.650869e-04
8.946039e-02 -1.250125e-03
8.947419e-02 1.231537e-03
8.948685e-02 -4.689003e-03
8.949771e-02 1.703801e-03
8.950577e-02 6.089770e-04
8.950979e-02 -1.662175e-03
8.952051e-02 -1.130333e-03
8.952394e-02 -2.533074e-04
8.952670e-02 -4.840903e-04
8.952962e-02 1.069479e-03
8.953248e-02 -1.842763e-03
8.954246e-02 1.212557e-03
8.954939e-02 9.411812e-04
8.956127e-02 -1.162502e-03
8.956570e-02 -1.483215e-03
8.956700e-02 3.739818e-03
8.958125e-02 2.034770e-03
8.958960e-02 3.838359e-03
8.959334e-02 -8.323919e-04
8.960263e-02 2.036340e-03
8.960280e-02 -1.543949e-03
8.960500e-02 2.179964e-03
8.960605e-02 1.419021e-03
8.960687e-02 3.683147e-03
8.962523e-02 1.733383e-03
8.963880e-02 -6.328399e-04
8.963961e-02 -2.643324e-03
8.964553e-02 1.307472e-03
8.965544e-02 -1.724984e-03
8.966561e-02 5.163949e-05
8.966892e-02 2.252778e-03
8.966892e-02 2.252778e-03
8.968453e-02 1.414603e-03
8.968660e-02 -3.128893e-04
8.968707e-02 1.432042e-03
8.968989e-02 -2.093862e-04
8.969440e-02 4.202192e-03
8.970350e-02 3.929730e-03
8.970908e-02 -1.172691e-03
8.971487e-02 6.075546e-03
8.972396e-02 -1.647463e-03
8.972522e-02 3.964056e-04
8.972899e-02 1.344214e-03
8.973703e-02 3.936067e-04
8.975209e-02 3.030045e-03
8.975420e-02 4.179056e-03
8.977855e-02 -3.955597e-05
8.977994e-02 3.823101e-04
8.979827e-02 -1.322372e-03
8.980557e-02 -7.672924e-04
8.981708e-02 8.222696e-04
8.982250e-02 -2.169533e-03
8.982594e-02 -4.857715e-04
8.983820e-02 -3.327891e-03
8.984418e-02 4.062116e-03
8.985079e-02 1.991720e-03
8.986724e-02 1.869426e-03
8.986874e-02 -5.386202e-04
8.987215e-02 1.003821e-03
8.987979e-02 -4.716870e-05
8.988234e-02 3.155454e-04
8.988794e-02 -1.517124e-03
8.989072e-02 1.639133e-04
8.989429e-02 -7.170400e-04
8.990607e-02 -1.821093e-03
8.990891e-02 -2.572729e-04
8.990891e-02 -2.572729e-04
8.993068e-02 -1.526433e-03
8.994647e-02 4.968765e-04
8.994964e-02 -4.725520e-04
8.995712e-02 5.775544e-04
8.995912e-02 2.411832e-04
8.996199e-02 -1.460113e-03
8.999289e-02 6.786474e-04
9.000065e-02 8.807843e-04
9.000674e-02 -8.914377e-04
9.000806e-02 5.544317e-03
9.001362e-02 2.517882e-03
9.002700e-02 3.771713e-04
9.004305e-02 -7.050914e-04
9.004370e-02 -9.706200e-04
9.004496e-02 5.156009e-04
9.005221e-02 1.963844e-03
9.005419e-02 4.937505e-04
9.006195e-02 -3.635341e-03
9.007091e-02 -5.456960e-04
9.008134e-02 6.665241e-04
9.008911e-02 -1.095322e-03
9.011583e-02 -1.959588e-03
9.012129e-02 1.440937e-03
9.014577e-02 3.880847e-03
9.014577e-02 3.880847e-03
9.014840e-02 -1.477955e-04
9.015232e-02 -3.365316e-03
9.015768e-02 3.732313e-03
9.017671e-02 -9.407976e-04
9.018407e-02 -1.929321e-03
9.018521e-02 9.299105e-04
9.020324e-02 -1.513156e-03
9.020621e-02 -2.344227e-03
9.020647e-02 1.863686e-03
9.021371e-02 -5.514053e-04
9.022165e-02 -3.643919e-04
9.024633e-02 5.244192e-03
9.025830e-02 8.085367e-04
9.026913e-02 -1.292569e-03
9.027398e-02 1.809106e-03
9.027685e-02 1.193642e-03
9.027697e-02 -5.165348e-04
9.027740e-02 -1.887735e-03
9.028778e-02 -1.371760e-03
9.028778e-02 -1.371760e-03
9.029310e-02 -5.306334e-04
9.030549e-02 1.126458e-03
9.030805e-02 -2.367694e-04
9.031167e-02 1.295288e-03
9.035635e-02 -1.214256e-03
9.036065e-02 4.673930e-03
9.036423e-02 1.533862e-03
9.037615e-02 -1.321103e-03
9.037615e-02 -1.321103e-03
9.038062e-02 3.708045e-04
9.039069e-02 -2.212149e-03
9.039396e-02 -1.633055e-04
9.039437e-02 -1.178681e-03
9.040597e-02 7.651170e-04
9.040833e-02 -1.930844e-05
9.041558e-02 8.538070e-04
9.041605e-02 1.548429e-03
9.041679e-02 7.163641e-04
9.042358e-02 -1.673471e-03
9.043805e-02 -1.801799e-03
9.045051e-02 -1.806797e-03
9.045051e-02 -1.806797e-03
9.045364e-02 -2.850793e-03
9.045373e-02 2.944135e-03
9.047009e-02 -1.092436e-03
9.047217e-02 2.737277e-03
9.049854e-02 4.075251e-03
9.049968e-02 5.647379e-04
9.050324e-02 -1.971136e-03
9.052020e-02 1.710611e-03
9.053093e-02 2.804732e-04
9.053489e-02 3.010910e-03
9.055541e-02 4.790484e-03
9.056541e-02 1.742276e-03
9.058526e-02 8.655671e-04
9.060261e-02 2.055684e-04
9.063295e-02 -1.661856e-03
9.063558e-02 3.858816e-05
9.064381e-02 2.380200e-03
9.064942e-02 -1.522703e-03
9.065499e-02 -1.167669e-03
9.066907e-02 2.702045e-03
9.066907e-02 2.702045e-03
9.068108e-02 1.041241e-03
9.069872e-02 1.870780e-04
9.078155e-02 -2.685484e-03
9.079537e-02 5.502625e-05
9.080774e-02 4.647075e-04
9.081297e-02 -1.963288e-03
9.082441e-02 5.715949e-04
9.083333e-02 -1.248317e-03
9.084776e-02 3.355567e-03
9.084904e-02 -9.846374e-04
9.085582e-02 1.287283e-03
9.085632e-02 2.063783e-03
9.086871e-02 -1.075409e-04
9.086906e-02 -2.050997e-03
9.088301e-02 2.738434e-03
9.089445e-02 -1.227396e-03
9.089677e-02 3.591593e-03
9.089976e-02 -5.344680e-03
9.091344e-02 -7.618884e-05
9.091908e-02 -1.631493e-03
9.092667e-02 3.162842e-03
9.095651e-02 -3.330329e-03
9.095763e-02 1.133034e-04
9.095907e-02 2.001037e-03
9.096018e-02 7.968915e-04
9.098298e-02 1.402556e-03
9.098519e-02 1.490905e-03
9.099146e-02 -6.679410e-04
9.099480e-02 -3.125442e-03
9.099588e-02 3.239018e-03
9.099853e-02 -1.888109e-04
9.100093e-02 -1.496930e-03
9.100620e-02 -2.106214e-03
9.101772e-02 1.139883e-03
9.102132e-02 -3.383544e-04
9.103077e-02 -4.427673e-04
9.103514e-02 -9.438004e-04
9.104214e-02 -2.312955e-03
9.105163e-02 8.040523e-04
9.105763e-02 -4.717827e-03
9.106442e-02 -8.844494e-04
9.107757e-02 1.164967e-03
9.109382e-02 -9.379474e-04
9.109501e-02 3.390290e-05
9.110115e-02 -2.368825e-04
9.110983e-02 5.464931e-03
9.111214e-02 -7.379115e-04
9.111416e-02 -1.716137e-03
9.112067e-02 3.437497e-03
9.112067e-02 3.437497e-03
9.112272e-02 4.840057e-03
9.112272e-02 4.840057e-03
9.112631e-02 -7.463011e-04
9.115851e-02 -2.266351e-03
9.117455e-02 -3.063535e-03
9.118087e-02 -1.417571e-03
9.118128e-02 6.440066e-03
9.118551e-02 7.754689e-03
9.119190e-02 1.363542e-03
9.121066e-02 -1.069188e-03
9.121411e-02 -1.200905e-03
9.122800e-02 -1.390415e-03
9.123419e-02 5.530792e-03
9.124104e-02 -1.393367e-03
9.124145e-02 1.450497e-03
9.124157e-02 4.960668e-03
9.124244e-02 -2.478753e-03
9.124828e-02 2.292618e-04
9.125027e-02 5.895979e-04
9.127516e-02 6.389065e-03
9.127575e-02 1.048615e-03
9.128104e-02 -3.282619e-03
9.128902e-02 9.063334e-04
9.131604e-02 5.829651e-04
9.131773e-02 -3.011809e-03
9.133675e-02 6.495007e-04
9.133823e-02 -3.018526e-03
9.135904e-02 4.315147e-03
9.139133e-02 -6.894190e-04
9.139478e-02 6.888040e-04
9.139651e-02 2.295686e-03
9.140294e-02 -2.937037e-04
9.140294e-02 -2.937037e-04
9.141380e-02 2.228512e-03
9.142268e-02 -9.034167e-04
9.143365e-02 -1.526631e-03
9.143525e-02 9.427550e-04
9.143668e-02 3.556792e-03
9.144892e-02 -3.676280e-04
9.145126e-02 -2.862061e-04
9.146288e-02 8.188463e-04
9.146629e-02 1.311050e-03
9.146867e-02 1.107140e-03
9.148003e-02 -2.764491e-04
9.148130e-02 -1.658776e-04
9.149287e-02 -4.672808e-04
9.149305e-02 -2.255674e-03
9.150529e-02 1.925619e-04
9.151244e-02 -1.113606e-03
9.151735e-02 6.715865e-04
9.151812e-02 2.068996e-03
9.154322e-02 9.372135e-04
9.156069e-02 -1.962852e-03
9.156414e-02 1.646634e-03
9.157184e-02 -9.921255e-04
9.157507e-02 2.374343e-03
9.157812e-02 7.504828e-05
9.158216e-02 -4.558152e-04
9.158498e-02 -1.142915e-03
9.159352e-02 2.263818e-03
9.160685e-02 2.283037e-03
9.161255e-02 4.621215e-03
9.161879e-02 8.372734e-04
9.163490e-02 4.985050e-03
9.169527e-02 6.214857e-05
9.169711e-02 5.257134e-04
9.170692e-02 4.379035e-04
9.174387e-02 4.468520e-05
9.175106e-02 -1.042132e-03
9.175276e-02 -1.430099e-03
9.176898e-02 1.027891e-03
9.177386e-02 6.069052e-04
9.178822e-02 3.012029e-03
9.179200e-02 3.846014e-03
9.181402e-02 -4.176649e-04
9.181688e-02 -1.868172e-03
9.182919e-02 1.202654e-03
9.183557e-02 -1.873816e-03
9.184448e-02 -1.972088e-03
9.185098e-02 3.324698e-03
9.186089e-02 -2.850052e-03
9.187840e-02 1.163562e-03
9.188297e-02 -1.359977e-03
9.189310e-02 -1.293626e-03
9.189708e-02 2.139914e-03
9.189757e-02 6.429259e-04
9.189881e-02 -1.841441e-03
9.190163e-02 1.013925e-04
9.190279e-02 8.489333e-05
9.191611e-02 1.867283e-03
9.192636e-02 -1.717266e-03
9.192636e-02 -1.717266e-03
9.194427e-02 2.243897e-03
9.195907e-02 -1.031280e-03
9.196632e-02 -1.802595e-04
9.196724e-02 -7.267825e-04
9.196771e-02 -1.172402e-03
9.198790e-02 1.039865e-04
9.202246e-02 -8.404240e-04
9.203330e-02 -8.518425e-04
9.205719e-02 3.729795e-04
9.206511e-02 1.487176e-03
9.206803e-02 -1.274799e-03
9.206803e-02 -1.274799e-03
9.207854e-02 -5.041582e-04
9.209463e-02 -1.751286e-03
9.210066e-02 2.200705e-03
9.210186e-02 -1.342226e-03
9.210427e-02 -1.780505e-03
9.210514e-02 -3.495355e-03
9.211545e-02 2.381947e-03
9.211584e-02 6.012822e-04
9.213389e-02 -9.888782e-04
9.213521e-02 -4.050881e-03
9.213521e-02 -4.050881e-03
9.214636e-02 -1.349678e-03
9.215401e-02 -4.450287e-04
9.216761e-02 1.023389e-03
9.216891e-02 1.156145e-03
9.217440e-02 4.389438e-03
9.218013e-02 1.148558e-03
9.218582e-02 -2.549478e-03
9.219813e-02 4.549553e-06
9.220492e-02 7.240975e-04
9.220522e-02 -1.103838e-03
9.220552e-02 3.326189e-04
9.220887e-02 9.651765e-04
9.222153e-02 2.778367e-04
9.222511e-02 1.938640e-03
9.222601e-02 1.020920e-03
9.222774e-02 -7.207759e-04
9.223315e-02 4.037545e-03
9.224140e-02 8.115396e-03
9.226002e-02 -2.828824e-05
9.227144e-02 -1.148883e-03
9.227557e-02 -5.071187e-06
9.227663e-02 -3.418918e-03
9.227724e-02 1.273063e-03
9.227847e-02 -1.591454e-03
9.230635e-02 -3.589405e-04
9.231712e-02 4.983735e-04
9.232548e-02 -6.515466e-04
9.233947e-02 1.264839e-04
9.234237e-02 3.301527e-03
9.234237e-02 3.301527e-03
9.234477e-02 -5.850225e-04
9.234645e-02 1.149488e-03
9.235458e-02 1.068997e-04
9.235721e-02 7.262604e-03
9.236323e-02 2.028979e-03
9.236526e-02 4.871911e-04
9.238771e-02 -3.633516e-03
9.239558e-02 7.621325e-04
9.240384e-02 -2.278797e-03
9.240391e-02 1.391372e-04
9.241883e-02 -1.258871e-03
9.242470e-02 -9.978052e-04
9.242888e-02 -1.371474e-03
9.243634e-02 2.038511e-04
9.244123e-02 4.687450e-04
9.244517e-02 3.010268e-03
9.245099e-02 -2.681605e-03
9.245695e-02 5.520628e-04
9.249522e-02 6.860823e-04
9.252234e-02 -8.234348e-04
9.255075e-02 3.452227e-03
9.255386e-02 4.913461e-04
9.255632e-02 1.974579e-03
9.256261e-02 2.815659e-04
9.256291e-02 -2.448517e-03
9.257036e-02 5.218397e-04
9.257399e-02 1.804050e-03
9.257421e-02 -1.766505e-04
9.259018e-02 -2.296040e-03
9.259832e-02 2.410124e-03
9.260028e-02 1.077641e-03
9.260117e-02 8.508839e-04
9.261798e-02 5.109501e-03
9.261798e-02 5.109501e-03
9.262004e-02 3.929870e-04
9.262110e-02 -3.551487e-04
9.262790e-02 7.953368e-04
9.263044e-02 3.285165e-03
9.263702e-02 -1.161381e-03
9.264292e-02 1.557974e-03
9.265952e-02 -1.784591e-03
9.266153e-02 4.031126e-03
9.266712e-02 2.193829e-03
9.266812e-02 6.607667e-05
9.267152e-02 -1.357564e-03
9.267392e-02 2.417632e-03
9.268190e-02 2.554189e-03
9.273044e-02 7.726268e-04
9.273619e-02 1.787633e-03
9.274011e-02 7.482357e-04
9.274047e-02 4.254385e-04
9.275845e-02 3.864881e-03
9.275891e-02 -1.540759e-03
9.276429e-02 1.869539e-03
9.278066e-02 1.866323e-03
9.278166e-02 -2.671370e-04
9.278449e-02 3.753113e-04
9.278859e-02 -5.447468e-04
9.279602e-02 1.127501e-03
9.280100e-02 3.080311e-03
9.280788e-02 1.431263e-03
9.281166e-02 2.772717e-04
9.281168e-02 -3.237901e-03
9.281243e-02 2.092741e-04
9.281795e-02 -1.369410e-03
9.282076e-02 1.564914e-04
9.285500e-02 -7.696680e-05
9.288301e-02 -8.534881e-04
9.290034e-02 8.257035e-04
9.290175e-02 -1.385587e-03
9.291284e-02 7.654470e-04
9.292204e-02 3.113760e-04
9.293555e-02 2.358850e-04
9.295414e-02 1.721512e-03
9.295616e-02 1.561092e-03
9.296251e-02 -2.689785e-04
9.296548e-02 3.858779e-03
9.296950e-02 6.069632e-04
9.297101e-02 -1.559878e-03
9.297454e-02 -3.330177e-03
9.299478e-02 -1.895166e-04
9.302266e-02 -1.284508e-03
9.302437e-02 -1.083058e-03
9.302848e-02 3.295323e-03
9.302848e-02 3.295323e-03
9.303890e-02 -3.307966e-03
9.304366e-02 4.230962e-03
9.305336e-02 -3.966415e-04
9.305811e-02 -1.106747e-03
9.306509e-02 3.482825e-04
9.307609e-02 1.952032e-03
9.307997e-02 -4.117634e-03
9.312740e-02 -2.399750e-03
9.319179e-02 -1.093602e-03
9.319652e-02 -8.745708e-04
9.320883e-02 4.211184e-04
9.323785e-02 -5.624118e-04
9.324185e-02 5.434471e-04
9.324529e-02 6.653807e-03
9.324569e-02 -2.212536e-03
9.325504e-02 4.171378e-04
9.325513e-02 -5.343760e-03
9.325659e-02 1.246637e-03
9.325750e-02 -3.753594e-03
9.326983e-02 1.052682e-03
9.328515e-02 -1.444082e-03
9.328981e-02 3.955300e-03
9.329620e-02 -6.050531e-05
9.330624e-02 1.503199e-03
9.331357e-02 1.470843e-03
9.331997e-02 1.156865e-03
9.332234e-02 6.477773e-03
9.333104e-02 3.021413e-04
9.333525e-02 -2.247511e-04
9.333782e-02 -4.472202e-04
9.334676e-02 -1.812507e-03
9.336428e-02 1.370803e-03
9.337302e-02 4.998956e-03
9.337574e-02 -3.033603e-05
9.338479e-02 -1.235497e-03
9.338782e-02 1.573618e-03
9.338782e-02 1.573618e-03
9.338989e-02 3.581825e-03
9.338989e-02 3.581825e-03
9.345193e-02 -5.866004e-04
9.345509e-02 -1.168668e-03
9.345555e-02 1.085988e-03
9.346676e-02 4.060034e-03
9.346676e-02 4.060034e-03
9.347250e-02 4.397555e-03
9.347440e-02 -9.041109e-04
9.347732e-02 4.428892e-04
9.348179e-02 8.173017e-03
9.348938e-02 2.429114e-03
9.349012e-02 -4.347360e-04
9.349076e-02 2.348669e-03
9.349336e-02 7.556930e-04
9.349964e-02 1.819973e-04
9.350208e-02 -1.393738e-03
9.350710e-02 3.426384e-03
9.351727e-02 3.889795e-04
9.353429e-02 1.652459e-03
9.354113e-02 2.519666e-04
9.354771e-02 3.208301e-03
9.356351e-02 3.835756e-04
9.356395e-02 -9.905213e-04
9.356836e-02 5.956065e-04
9.358088e-02 4.886233e-03
9.358971e-02 3.037359e-03
9.359331e-02 -1.270267e-03
9.359818e-02 3.484554e-03
9.361669e-02 -1.354324e-03
9.362643e-02 2.111561e-04
9.362982e-02 3.830520e-03
9.364464e-02 -2.699499e-04
9.365424e-02 6.177338e-04
9.366757e-02 -2.460559e-03
9.368321e-02 2.516214e-03
9.368677e-02 8.442239e-04
9.369046e-02 2.468982e-03
9.369807e-02 6.630998e-03
9.370207e-02 -1.058997e-03
9.371108e-02 1.565218e-03
9.372508e-02 -3.803110e-04
9.372785e-02 -1.048488e-03
9.375088e-02 -2.136653e-03
9.377165e-02 8.884422e-04
9.377229e-02 1.884053e-03
9.377699e-02 -4.777653e-03
9.377787e-02 2.098839e-03
9.377833e-02 8.510571e-04
9.378166e-02 -5.935488e-05
9.378773e-02 3.851426e-03
9.378961e-02 1.538008e-03
9.381669e-02 1.787633e-03
9.382665e-02 -2.387339e-03
9.383018e-02 3.027696e-03
9.383587e-02 -1.027852e-03
9.383604e-02 -8.125526e-04
9.383859e-02 3.156636e-03
9.384354e-02 5.970698e-04
9.384524e-02 1.046119e-03
9.384852e-02 9.063595e-04
9.384998e-02 8.522759e-04
9.388433e-02 -1.805171e-03
9.389694e-02 8.154943e-04
9.389891e-02 2.098609e-03
9.391809e-02 -2.044049e-04
9.392238e-02 9.031430e-04
9.393155e-02 8.702657e-03
9.395089e-02 -1.205120e-03
9.395437e-02 1.428020e-03
9.395969e-02 -8.698388e-04
9.396325e-02 3.686377e-03
9.396411e-02 -1.425402e-03
9.397040e-02 1.665779e-03
9.397286e-02 1.055539e-03
9.397430e-02 -1.032245e-03
9.397586e-02 2.518735e-03
9.398026e-02 1.980119e-03
9.398091e-02 -2.351094e-03
9.398307e-02 5.399708e-04
9.399043e-02 -4.100519e-04
9.399793e-02 -2.654741e-03
9.399980e-02 -3.126949e-04
9.400181e-02 1.725507e-03
9.400534e-02 -1.148250e-03
9.400962e-02 2.523657e-03
9.404103e-02 4.305147e-03
9.404626e-02 -5.180859e-04
9.405047e-02 6.528964e-03
9.405628e-02 1.076892e-03
9.405889e-02 7.806847e-04
9.406269e-02 -4.195707e-04
9.406336e-02 -6.170046e-04
9.407787e-02 2.780749e-03
9.408070e-02 5.237380e-03
9.408575e-02 -2.105984e-03
9.409977e-02 2.377842e-03
9.411151e-02 3.840427e-03
9.412583e-02 -9.672004e-04
9.413170e-02 2.467491e-03
9.414123e-02 2.217321e-03
9.415622e-02 -2.579680e-04
9.415687e-02 3.619951e-03
9.417836e-02 4.252367e-04
9.418183e-02 2.811828e-03
9.418183e-02 2.811828e-03
9.418467e-02 5.831138e-03
9.419407e-02 1.554367e-03
9.419834e-02 1.502969e-03
9.419873e-02 4.671422e-03
9.420390e-02 1.069808e-03
9.420491e-02 -1.270860e-03
9.421521e-02 -1.142706e-03
9.422406e-02 -1.642217e-04
9.423881e-02 -2.073352e-03
9.423881e-02 -2.073352e-03
9.425453e-02 -5.794858e-04
9.425543e-02 1.875792e-03
9.425618e-02 -9.593697e-04
9.428926e-02 6.788106e-04
9.429176e-02 1.250211e-03
9.430156e-02 -4.358581e-04
9.430469e-02 1.759139e-03
9.431444e-02 -3.232900e-04
9.432173e-02 3.783888e-03
9.432410e-02 -1.135984e-03
9.432470e-02 -4.768701e-04
9.432547e-02 1.912257e-03
9.433103e-02 -5.375011e-04
9.434101e-02 -6.381195e-04
9.434140e-02 -2.294679e-03
9.434302e-02 1.447700e-03
9.435652e-02 -3.268133e-03
9.438089e-02 2.033947e-03
9.438210e-02 9.796635e-04
9.438367e-02 5.443255e-04
9.439534e-02 1.922371e-03
9.442272e-02 -1.040678e-03
9.444553e-02 2.315809e-03
9.444862e-02 8.159723e-04
9.446059e-02 -1.473014e-03
9.446252e-02 4.317729e-04
9.448116e-02 4.457632e-04
9.448270e-02 1.079890e-03
9.449468e-02 7.853289e-04
9.449497e-02 -1.925812e-03
9.452211e-02 5.221935e-03
9.453982e-02 -9.789099e-04
9.453982e-02 -9.789099e-04
9.454221e-02 4.303807e-03
9.454845e-02 -2.527350e-03
9.455225e-02 -2.362310e-04
9.455362e-02 -1.061355e-03
9.456300e-02 2.947988e-03
9.456408e-02 2.989576e-03
9.456570e-02 -7.426858e-04
9.457823e-02 2.615465e-03
9.458174e-02 -1.811095e-03
9.459247e-02 8.677510e-04
9.459825e-02 1.659557e-03
9.460736e-02 1.518941e-03
9.461933e-02 2.623824e-04
9.462785e-02 3.539099e-04
9.462932e-02 -1.006122e-03
9.463205e-02 2.826845e-03
9.466184e-02 5.686651e-03
9.469223e-02 -1.549285e-03
9.469250e-02 -2.364976e-04
9.469406e-02 8.561321e-05
9.470539e-02 -1.179982e-03
9.472670e-02 3.432305e-03
9.473254e-02 2.003134e-04
9.474465e-02 -1.203826e-04
9.475352e-02 2.238689e-03
9.475854e-02 3.888936e-03
9.476364e-02 6.011796e-04
9.476933e-02 1.953225e-03
9.478017e-02 -3.261612e-03
9.478592e-02 1.625971e-03
9.478745e-02 -2.964689e-03
9.480543e-02 -1.013858e-03
9.480848e-02 -1.460775e-03
9.481468e-02 3.794137e-03
9.481485e-02 5.346022e-03
9.482179e-02 -7.878697e-04
9.482523e-02 4.183572e-03
9.484098e-02 8.841717e-04
9.484576e-02 1.639896e-03
9.484697e-02 1.989641e-04
9.485436e-02 6.540414e-04
9.486595e-02 2.583199e-03
9.487817e-02 1.798184e-03
9.487872e-02 -3.031249e-03
9.488485e-02 -1.558906e-03
9.489478e-02 -1.840306e-03
9.490006e-02 -1.025814e-03
9.490256e-02 1.894390e-03
9.490420e-02 -1.326258e-03
9.490567e-02 -1.621404e-03
9.491553e-02 -1.488428e-03
9.493103e-02 -6.379339e-04
9.493898e-02 4.193661e-03
9.493900e-02 2.068135e-03
9.496034e-02 -2.684689e-04
9.497054e-02 -2.651094e-05
9.498410e-02 3.562546e-04
9.498858e-02 9.275698e-04
9.499028e-02 1.342334e-04
9.499631e-02 9.510647e-04
9.499859e-02 4.331556e-03
9.501522e-02 2.233706e-03
9.503443e-02 -3.113891e-04
9.504358e-02 -2.333377e-03
9.505466e-02 -2.046136e-03
9.505718e-02 -2.838467e-03
9.506001e-02 2.391016e-04
9.506364e-02 -9.331436e-04
9.506530e-02 2.067897e-03
9.507613e-02 4.195366e-03
9.508421e-02 -2.426399e-03
9.509259e-02 8.972547e-04
9.510220e-02 1.474117e-04
9.510252e-02 1.351261e-03
9.511046e-02 7.700744e-03
9.511481e-02 5.060051e-03
9.511785e-02 -6.543546e-04
9.511908e-02 8.787225e-04
9.512237e-02 4.934575e-04
9.512371e-02 -1.404951e-03
9.512977e-02 7.326839e-04
9.513156e-02 -5.463516e-04
9.514039e-02 1.079171e-03
9.514065e-02 -3.361687e-04
9.514492e-02 3.647524e-03
9.518334e-02 2.370399e-04
9.518342e-02 -7.171691e-04
9.518847e-02 -4.219651e-03
9.519612e-02 -3.154785e-03
9.520251e-02 1.743062e-03
9.520504e-02 -1.220694e-03
9.523381e-02 -4.113399e-03
9.523635e-02 1.846716e-04
9.524809e-02 1.735183e-03
9.525371e-02 4.062853e-03
9.525489e-02 1.064526e-03
9.525620e-02 1.126582e-03
9.527013e-02 6.409282e-04
9.527198e-02 5.162726e-04
9.529704e-02 3.066818e-03
9.529798e-02 -6.618182e-04
9.530164e-02 1.482280e-03
9.534871e-02 -2.325769e-04
9.536405e-02 -2.144850e-03
9.536405e-02 -2.144850e-03
9.536587e-02 -4.252349e-03
9.537271e-02 -3.131627e-03
9.537317e-02 -2.605013e-05
9.537885e-02 -3.443294e-04
9.538367e-02 -5.025856e-04
9.539164e-02 4.065170e-04
9.539390e-02 -4.896465e-04
9.539971e-02 -7.934944e-04
9.540446e-02 -1.007747e-03
9.541748e-02 1.251806e-03
9.542672e-02 -4.757287e-04
9.543343e-02 -2.467056e-03
9.546466e-02 -1.231617e-03
9.547751e-02 1.436629e-03
9.548694e-02 -1.252275e-03
9.550117e-02 1.251608e-03
9.550947e-02 1.034973e-03
9.553324e-02 3.380852e-03
9.553438e-02 1.376363e-03
9.554615e-02 7.770444e-04
9.555470e-02 3.564260e-03
9.556084e-02 8.700660e-04
9.556759e-02 6.691871e-04
9.557434e-02 6.162116e-04
9.558181e-02 1.618196e-03
9.559040e-02 -1.791923e-04
9.559132e-02 5.840259e-04
9.559551e-02 -1.275007e-03
9.561004e-02 1.681376e-03
9.561152e-02 4.189934e-03
9.561195e-02 1.388726e-03
9.561434e-02 3.739625e-04
9.561557e-02 1.114616e-02
9.562049e-02 3.268929e-04
9.562049e-02 3.268929e-04
9.563566e-02 5.791967e-04
9.564561e-02 -1.170016e-03
9.564778e-02 2.216071e-04
9.564998e-02 1.413147e-03
9.566736e-02 6.833411e-04
9.566967e-02 -2.148432e-03
9.567154e-02 -1.768412e-03
9.568279e-02 3.977226e-03
9.568610e-02 -2.758562e-03
9.569019e-02 -4.179138e-04
9.569327e-02 8.740687e-04
9.569483e-02 3.316325e-04
9.570621e-02 3.099636e-03
9.572435e-02 3.445326e-04
9.576254e-02 9.672733e-04
9.576410e-02 -2.399128e-03
9.578368e-02 2.192034e-05
9.580373e-02 2.707275e-03
9.580698e-02 -2.913147e-03
9.582402e-02 8.480991e-04
9.583614e-02 1.119161e-03
9.583904e-02 1.983439e-03
9.584194e-02 -1.658093e-03
9.586072e-02 -3.230948e-03
9.587011e-02 -2.324914e-03
9.587495e-02 -7.621800e-04
9.587936e-02 7.415180e-04
9.588029e-02 6.724171e-03
9.588040e-02 5.141229e-04
9.588517e-02 -1.709379e-03
9.588796e-02 -2.682566e-04
9.589490e-02 -2.456684e-03
9.590000e-02 2.305047e-03
9.590913e-02 -1.192379e-03
9.591919e-02 7.869792e-04
9.591979e-02 -6.324340e-04
9.594622e-02 1.697069e-03
9.595192e-02 -2.616799e-03
9.596504e-02 1.064804e-03
9.597749e-02 -2.177762e-03
9.601493e-02 3.969537e-03
9.603674e-02 -2.057948e-03
9.603840e-02 6.392720e-05
9.604422e-02 -2.168201e-03
9.606548e-02 -5.056041e-04
9.606783e-02 -3.572520e-03
9.607125e-02 1.222162e-03
9.609044e-02 5.424862e-03
9.609196e-02 -1.005682e-04
9.610091e-02 7.206615e-05
9.613679e-02 1.852166e-04
9.614799e-02 -1.988400e-03
9.615033e-02 -5.678277e-04
9.615203e-02 4.377626e-03
9.616894e-02 3.016849e-03
9.617006e-02 1.778354e-03
9.618491e-02 3.126945e-04
9.619381e-02 1.401643e-03
9.619748e-02 8.316533e-04
9.620779e-02 2.653306e-03
9.621532e-02 2.223949e-03
9.622052e-02 4.856998e-03
9.624820e-02 6.600438e-04
9.625205e-02 -2.020999e-03
9.627287e-02 -6.177960e-04
9.627287e-02 -6.177960e-04
9.628262e-02 5.367471e-04
9.628903e-02 3.449566e-03
9.629568e-02 4.229628e-04
9.630232e-02 3.502648e-03
9.630723e-02 -1.355217e-03
9.631481e-02 1.197153e-03
9.632353e-02 -8.148736e-04
9.632764e-02 4.304376e-03
9.633468e-02 1.148375e-04
9.634376e-02 1.068423e-03
9.634575e-02 1.207120e-03
9.634785e-02 -2.863006e-03
9.635518e-02 2.223396e-04
9.636142e-02 -2.176479e-03
9.636499e-02 -1.022350e-03
9.637347e-02 -3.603236e-03
9.640542e-02 -5.846351e-04
9.640707e-02 8.292389e-04
9.641912e-02 1.478084e-04
9.642608e-02 2.936968e-03
9.644254e-02 -2.474616e-03
9.645257e-02 -1.151930e-04
9.645456e-02 9.615593e-04
9.646891e-02 3.710357e-04
9.646966e-02 1.166528e-03
9.647601e-02 6.560026e-04
9.648006e-02 2.981750e-04
9.648582e-02 -1.365016e-03
9.649343e-02 2.694314e-03
9.649430e-02 -5.924228e-04
9.650504e-02 5.769024e-04
9.651132e-02 5.581872e-04
9.651890e-02 2.877130e-03
9.651974e-02 5.564042e-04
9.655979e-02 1.651261e-03
9.656695e-02 1.967433e-04
9.656700e-02 -2.135402e-03
9.657570e-02 3.389371e-04
9.658781e-02 7.921965e-05
9.659486e-02 4.266650e-04
9.659486e-02 4.266650e-04
9.659652e-02 7.631347e-04
9.660010e-02 -3.365619e-03
9.660397e-02 3.618972e-04
9.661769e-02 1.627002e-03
9.662789e-02 2.452417e-03
9.662832e-02 -1.531104e-03
9.663696e-02 2.718318e-04
9.664546e-02 4.530486e-03
9.668309e-02 4.492435e-03
9.669008e-02 6.499942e-03
9.670734e-02 -1.866482e-03
9.671985e-02 1.555856e-03
9.672077e-02 -1.090723e-03
9.673010e-02 -1.725970e-03
9.673429e-02 -3.249182e-03
9.675888e-02 -1.182120e-03
9.676547e-02 9.153440e-04
9.676758e-02 5.606833e-04
9.677164e-02 -4.136281e-03
9.678023e-02 -1.434402e-03
9.679624e-02 -2.232221e-03
9.679635e-02 5.306148e-03
9.679871e-02 3.304995e-04
9.679889e-02 9.710803e-04
9.679931e-02 -3.718912e-04
9.681728e-02 4.838140e-04
9.681751e-02 2.999011e-04
9.682497e-02 1.794356e-03
9.683597e-02 -1.649572e-04
9.685785e-02 -1.980854e-03
9.686131e-02 4.800544e-04
9.686683e-02 -1.280546e-03
9.687610e-02 2.052519e-03
9.687620e-02 -2.209202e-03
9.689028e-02 4.658232e-04
9.689443e-02 -2.094323e-03
9.690342e-02 1.077520e-03
9.691502e-02 -3.605434e-04
9.692044e-02 6.752603e-04
9.695215e-02 -1.971776e-03
9.695947e-02 1.961684e-03
9.696892e-02 -3.664054e-04
9.698079e-02 -1.122882e-03
9.698189e-02 -1.246621e-03
9.698278e-02 1.124713e-03
9.698323e-02 -3.490457e-03
9.699210e-02 2.697973e-03
9.700377e-02 -3.821917e-03
9.701039e-02 -3.371265e-03
9.701039e-02 -3.371265e-03
9.701416e-02 -2.375216e-04
9.701853e-02 -7.120136e-04
9.701970e-02 5.425188e-03
9.703272e-02 5.887529e-04
9.704716e-02 6.707729e-04
9.705715e-02 2.795669e-03
9.705797e-02 -4.822582e-03
9.705977e-02 1.897806e-03
9.706395e-02 8.208392e-04
9.707061e-02 -5.882063e-04
9.707759e-02 3.498775e-03
9.708747e-02 -8.693480e-04
9.710523e-02 3.919972e-03
9.710523e-02 3.919972e-03
9.710903e-02 -4.481661e-03
9.712135e-02 2.014905e-04
9.712681e-02 -1.240335e-03
9.712999e-02 1.112147e-03
9.713230e-02 -2.033843e-03
9.715415e-02 -6.491953e-04
9.722081e-02 2.356197e-03
9.725847e-02 1.411234e-03
9.726458e-02 -7.335409e-05
9.727683e-02 -1.911736e-03
9.728315e-02 2.722076e-03
9.728928e-02 -2.099889e-04
9.730569e-02 4.242770e-04
9.732730e-02 8.325488e-04
9.733435e-02 8.965812e-04
9.735321e-02 3.474497e-04
9.737340e-02 1.031382e-03
9.738036e-02 -2.386280e-03
9.738173e-02 4.137413e-04
9.739062e-02 5.133601e-03
9.742357e-02 -1.640105e-04
9.747208e-02 1.988200e-03
9.747249e-02 6.207399e-04
9.747286e-02 3.519875e-03
9.747754e-02 8.503095e-04
9.748096e-02 2.156303e-03
9.748410e-02 1.259591e-03
9.749006e-02 7.428524e-05
9.749601e-02 5.934954e-04
9.749979e-02 5.495775e-03
9.751407e-02 1.146307e-03
9.753344e-02 3.020846e-03
9.753667e-02 1.702737e-03
9.754614e-02 1.637111e-03
9.755221e-02 4.648941e-03
9.755291e-02 -4.817618e-04
9.755632e-02 1.899288e-03
9.755739e-02 3.830721e-03
9.755830e-02 1.026042e-03
9.757195e-02 1.965260e-03
9.757214e-02 1.972227e-05
9.757675e-02 4.958200e-03
9.757779e-02 2.729774e-04
9.758010e-02 8.139955e-04
9.758525e-02 -3.088885e-04
9.758594e-02 1.218116e-03
9.758693e-02 -2.052143e-03
9.758960e-02 5.265038e-03
9.759166e-02 -2.404523e-03
9.759371e-02 1.596214e-03
9.762622e-02 -5.400881e-05
9.762675e-02 -1.251663e-03
9.762927e-02 -1.010179e-03
9.763197e-02 8.963797e-04
9.764416e-02 -1.185691e-03
9.768050e-02 -2.431159e-03
9.769697e-02 1.203063e-03
9.769905e-02 -1.682638e-03
9.769905e-02 -1.682638e-03
9.770129e-02 -7.037162e-04
9.771258e-02 -1.392029e-03
9.771380e-02 -1.533696e-03
9.771550e-02 8.495147e-05
9.772564e-02 3.249491e-03
9.772992e-02 2.065252e-03
9.773173e-02 3.507267e-03
9.773229e-02 7.189512e-03
9.773499e-02 -2.587603e-03
9.774044e-02 1.838362e-04
9.774690e-02 3.497604e-04
9.775067e-02 8.316198e-04
9.775145e-02 1.595914e-03
9.776264e-02 2.600507e-03
9.776514e-02 1.615382e-03
9.778269e-02 6.093949e-04
9.780080e-02 -2.058363e-03
9.780080e-02 -2.058363e-03
9.780294e-02 -3.588150e-04
9.780334e-02 1.043058e-03
9.780450e-02 5.870839e-03
9.780899e-02 -2.256695e-04
9.781051e-02 -4.646785e-04
9.781831e-02 -1.460143e-03
9.781880e-02 3.272960e-04
9.782057e-02 7.770780e-04
9.782599e-02 1.682342e-03
9.784221e-02 -8.143322e-04
9.785889e-02 3.105147e-04
9.786301e-02 1.969739e-03
9.786326e-02 1.301082e-03
9.786636e-02 5.468556e-04
9.787523e-02 2.507889e-03
9.788997e-02 -1.246030e-03
9.789124e-02 3.205925e-04
9.789400e-02 3.254765e-03
9.789651e-02 6.315650e-04
9.791398e-02 -2.221391e-04
9.792259e-02 -2.659840e-03
9.792888e-02 3.487758e-03
9.793272e-02 1.081139e-03
9.794294e-02 -1.795899e-03
9.795787e-02 -7.150535e-04
9.795787e-02 -7.150535e-04
9.796896e-02 3.216000e-03
9.797173e-02 1.528286e-03
9.797659e-02 5.969221e-03
9.798295e-02 1.163982e-03
9.798586e-02 3.247319e-04
9.798918e-02 -1.619681e-03
9.799641e-02 2.750313e-03
9.800456e-02 -8.815516e-04
9.801802e-02 2.703008e-03
9.802372e-02 2.215689e-05
9.803284e-02 -4.502511e-04
9.803570e-02 1.128651e-03
9.805186e-02 2.608009e-03
9.806850e-02 -1.725038e-03
9.806889e-02 1.198373e-03
9.807698e-02 1.540853e-03
9.808114e-02 -3.775482e-04
9.808965e-02 3.617556e-03
9.809311e-02 2.199261e-03
9.809696e-02 1.147194e-03
9.809927e-02 -1.349044e-03
9.809980e-02 8.808087e-04
9.812054e-02 4.728152e-04
9.813457e-02 1.952515e-03
9.813818e-02 -2.767337e-04
9.814187e-02 5.595222e-03
9.814343e-02 -1.012358e-03
9.814560e-02 1.201280e-03
9.814560e-02 1.201280e-03
9.815666e-02 1.044222e-03
9.815915e-02 -1.579878e-03
9.817563e-02 -1.560179e-03
9.818736e-02 -6.504114e-04
9.824287e-02 3.327083e-04
9.824538e-02 6.132734e-04
9.824554e-02 1.704114e-03
9.825969e-02 6.866132e-04
9.826965e-02 -5.401328e-04
9.827222e-02 1.284230e-03
9.827650e-02 -1.686344e-03
9.829018e-02 3.021239e-03
9.831777e-02 -2.492334e-03
9.832845e-02 -1.091484e-03
9.833331e-02 6.167831e-04
9.833856e-02 -8.295940e-04
9.834675e-02 -1.111787e-03
9.835104e-02 -8.531367e-04
9.835800e-02 -1.327321e-03
9.836425e-02 4.292491e-04
9.836905e-02 -1.200218e-03
9.839498e-02 4.979503e-04
9.841457e-02 3.975124e-03
9.841602e-02 1.710423e-04
9.841680e-02 -2.668925e-04
9.841940e-02 3.943889e-04
9.842301e-02 2.402650e-03
9.842485e-02 -1.736148e-03
9.843009e-02 -1.624338e-03
9.843914e-02 2.051528e-03
9.844353e-02 -2.799981e-03
9.846132e-02 -1.963533e-04
9.847627e-02 -2.415125e-03
9.850030e-02 -9.182795e-04
9.850045e-02 9.355119e-04
9.851175e-02 8.401983e-04
9.851175e-02 8.401983e-04
9.853823e-02 -5.993873e-04
9.853944e-02 3.851231e-03
9.854132e-02 1.763892e-04
9.856234e-02 1.213862e-03
9.856326e-02 3.867841e-04
9.856376e-02 2.028501e-03
9.858857e-02 1.807876e-03
9.859290e-02 9.160123e-05
9.859514e-02 -3.508970e-03
9.860916e-02 -3.355484e-03
9.861828e-02 -1.092012e-03
9.862494e-02 5.130825e-03
9.862683e-02 4.294724e-04
9.862795e-02 -2.301187e-03
9.862986e-02 1.240869e-03
9.863102e-02 -1.389549e-03
9.863789e-02 -1.681740e-03
9.864012e-02 1.671514e-03
9.865028e-02 -7.114487e-04
9.866591e-02 3.844591e-03
9.866923e-02 -1.465046e-03
9.867471e-02 2.456862e-03
9.867472e-02 3.483742e-03
9.867762e-02 -1.384435e-04
9.867852e-02 1.331890e-03
9.868166e-02 -5.038424e-04
9.868818e-02 3.940950e-03
9.869497e-02 1.468228e-03
9.871235e-02 6.301872e-03
9.872356e-02 4.734227e-03
9.874456e-02 1.122058e-03
9.874910e-02 -2.816074e-03
9.875679e-02 -1.318721e-03
9.875971e-02 -1.047136e-03
9.876045e-02 -1.214183e-03
9.878450e-02 6.779068e-03
9.878613e-02 -3.992215e-04
9.880270e-02 -1.285928e-04
9.881056e-02 -1.682891e-03
9.881056e-02 -1.682891e-03
9.881544e-02 -1.650646e-03
9.882390e-02 1.923843e-03
9.882556e-02 8.308386e-04
9.883272e-02 3.594268e-04
9.883499e-02 9.079384e-04
9.884521e-02 2.499644e-04
9.884664e-02 3.929339e-03
9.886317e-02 -7.819822e-04
9.888279e-02 -9.064397e-04
9.890534e-02 6.928989e-04
9.891633e-02 3.305841e-03
9.892846e-02 5.013494e-03
9.892850e-02 -6.817737e-04
9.894603e-02 1.659862e-03
9.895047e-02 -3.659708e-04
9.895978e-02 3.246536e-04
9.896846e-02 -6.562313e-07
9.896993e-02 -1.985604e-03
9.897758e-02 3.433344e-03
9.897815e-02 1.061401e-03
9.898127e-02 -1.730242e-03
9.898282e-02 -1.697799e-03
9.898913e-02 1.118064e-03
9.899911e-02 -4.333733e-03
9.900276e-02 3.419010e-03
9.900378e-02 9.930144e-06
9.900605e-02 -1.523098e-03
9.901605e-02 6.233082e-04
9.903203e-02 1.800943e-03
9.903537e-02 -2.208494e-03
9.903618e-02 1.259863e-03
9.903734e-02 1.238945e-04
9.904767e-02 -1.648825e-03
9.904856e-02 -2.011687e-03
9.904906e-02 3.297704e-04
9.905147e-02 -1.083289e-03
9.905604e-02 -2.484332e-03
9.906062e-02 2.540752e-03
9.906559e-02 -1.166150e-03
9.908872e-02 1.722783e-03
9.908912e-02 1.686320e-03
9.909013e-02 -1.884545e-03
9.911714e-02 2.747641e-03
9.913357e-02 8.812272e-04
9.913815e-02 3.179830e-05
9.914932e-02 4.938856e-04
9.915064e-02 2.032562e-03
9.915221e-02 -7.333133e-04
9.915398e-02 1.011800e-03
9.915897e-02 1.495806e-04
9.916209e-02 -1.496873e-03
9.916562e-02 -8.961488e-04
9.917123e-02 2.959460e-04
9.917279e-02 -7.356912e-04
9.917666e-02 -5.466945e-03
9.917931e-02 1.760082e-03
9.917983e-02 -3.321293e-04
9.918461e-02 2.040063e-03
9.919091e-02 1.149155e-04
9.919175e-02 2.179211e-03
9.919809e-02 4.347840e-03
9.919809e-02 4.347840e-03
9.920620e-02 -2.633723e-03
9.921038e-02 -7.785387e-04
9.922565e-02 3.159197e-03
9.923974e-02 6.345464e-03
9.924435e-02 -7.147943e-04
9.924912e-02 6.944243e-04
9.925867e-02 -1.044836e-03
9.927441e-02 2.398487e-03
9.927914e-02 -2.308547e-03
9.928311e-02 -9.274080e-04
9.931361e-02 3.154903e-03
9.933510e-02 -6.485012e-04
9.933807e-02 1.296346e-03
9.936464e-02 5.884116e-04
9.936790e-02 4.992014e-04
9.937672e-02 -1.315311e-03
9.937793e-02 -2.998153e-03
9.938259e-02 -7.555284e-04
9.938405e-02 2.359036e-03
9.938521e-02 -3.100717e-06
9.939273e-02 -1.840040e-03
9.939497e-02 -2.243575e-03
9.940576e-02 -1.191009e-03
9.940786e-02 3.157419e-04
9.941338e-02 -2.097717e-03
9.941647e-02 3.943805e-04
9.942307e-02 1.950997e-03
9.944600e-02 4.728097e-04
9.945103e-02 -2.534512e-04
9.946292e-02 -1.369313e-03
9.946321e-02 -1.200138e-03
9.947397e-02 -1.364739e-03
9.949200e-02 -2.116944e-03
9.949361e-02 1.676870e-03
9.950285e-02 -3.503011e-04
9.950383e-02 5.179998e-03
9.950519e-02 2.648628e-03
9.952079e-02 -1.564957e-03
9.953873e-02 1.882970e-03
9.955448e-02 3.727768e-03
9.956319e-02 -2.732947e-03
9.957388e-02 -1.016941e-03
9.958210e-02 5.829742e-04
9.958494e-02 -2.748756e-03
9.959065e-02 3.201802e-03
9.959523e-02 -1.783867e-03
9.960380e-02 -2.283927e-03
9.960751e-02 2.211266e-03
9.962659e-02 -2.568622e-03
9.966275e-02 8.978960e-04
9.968157e-02 3.298087e-04
9.969127e-02 -1.526305e-03
9.969264e-02 2.821662e-03
9.970607e-02 1.100473e-03
9.971827e-02 -5.924782e-04
9.971908e-02 4.298489e-03
9.972791e-02 -1.177462e-04
9.974482e-02 -4.488461e-04
9.974853e-02 1.008843e-03
9.975903e-02 1.985672e-03
9.977638e-02 6.736721e-04
9.978681e-02 5.075668e-04
9.979025e-02 -3.947322e-04
9.979222e-02 -1.514543e-03
9.979414e-02 -8.922887e-04
9.981688e-02 3.369695e-03
9.981892e-02 -1.770731e-03
9.982022e-02 -8.167185e-04
9.982704e-02 1.311995e-03
9.982822e-02 8.225526e-04
9.983157e-02 1.087565e-03
9.984952e-02 3.801434e-03
9.985001e-02 2.867970e-03
9.985031e-02 6.647786e-04
9.985186e-02 3.132372e-03
9.986562e-02 3.750543e-03
9.986880e-02 -3.595768e-04
9.987243e-02 2.571804e-03
9.987868e-02 -8.976258e-04
9.988341e-02 2.984316e-03
9.988623e-02 -7.932967e-04
9.988740e-02 1.216024e-03
9.989002e-02 1.156194e-03
9.989722e-02 5.426546e-03
9.990409e-02 9.461293e-04
9.990503e-02 9.611159e-04
9.990618e-02 -1.420274e-04
9.994974e-02 9.883062e-04
9.997759e-02 -1.559602e-03
9.997982e-02 5.605544e-03
1.000022e-01 -1.596211e-03
1.000022e-01 -2.438368e-03
1.000117e-01 -2.047012e-03
1.000170e-01 -5.001394e-04
1.000276e-01 -3.941233e-03
1.000308e-01 3.858118e-03
1.000437e-01 2.239139e-03
1.000465e-01 2.861641e-04
1.000480e-01 7.633385e-04
1.000524e-01 2.813169e-03
1.000664e-01 -9.092457e-04
1.000831e-01 3.590922e-03
1.000852e-01 3.104459e-03
1.000852e-01 3.104459e-03
1.000875e-01 9.849225e-04
1.000875e-01 9.849225e-04
1.000927e-01 -2.810470e-03
1.001005e-01 1.810725e-04
1.001042e-01 2.462742e-03
1.001058e-01 -1.687360e-03
1.001095e-01 2.188826e-03
1.001264e-01 1.496688e-03
1.001284e-01 2.010233e-03
1.001317e-01 -1.049903e-03
1.001327e-01 3.250081e-03
1.001404e-01 -1.150355e-03
1.001460e-01 -9.809371e-04
1.001609e-01 -6.113767e-04
1.001633e-01 -6.186202e-03
1.001751e-01 1.572113e-03
1.001781e-01 4.448554e-03
1.001788e-01 -1.095112e-03
1.001848e-01 7.825536e-03
1.001888e-01 -1.127116e-03
1.001888e-01 -1.127116e-03
1.001961e-01 -1.771237e-03
1.001961e-01 -1.771237e-03
1.002196e-01 2.354232e-03
1.002201e-01 7.757242e-04
1.002247e-01 7.718354e-04
1.002326e-01 -1.137674e-03
1.002535e-01 9.667746e-04
1.002536e-01 -5.783771e-04
1.002590e-01 6.830882e-04
1.002591e-01 1.344467e-03
1.002648e-01 -1.885251e-03
1.002698e-01 -2.209188e-03
1.002783e-01 -1.988607e-03
1.002784e-01 2.561172e-03
1.002996e-01 3.676023e-03
1.003010e-01 4.022427e-04
1.003010e-01 4.022427e-04
1.003089e-01 5.931683e-04
1.003103e-01 3.602182e-03
1.003115e-01 6.388711e-04
1.003203e-01 3.584891e-04
1.003267e-01 4.719637e-04
1.003276e-01 2.675079e-04
1.003305e-01 5.474923e-03
1.003391e-01 8.740451e-04
1.003444e-01 2.754351e-03
1.003508e-01 -1.907547e-04
1.003748e-01 1.251396e-03
1.003856e-01 6.453832e-04
1.003888e-01 -1.020812e-03
1.003908e-01 -6.752439e-04
1.003923e-01 -8.514058e-04
1.003940e-01 1.048072e-04
1.004024e-01 1.233229e-03
1.004098e-01 -2.356482e-03
1.004158e-01 6.973258e-04
1.004188e-01 -6.780520e-04
1.004282e-01 -3.235195e-04
1.004391e-01 1.182283e-03
1.004548e-01 -1.084979e-03
1.004555e-01 1.872107e-04
1.004563e-01 2.090726e-03
1.004588e-01 7.723199e-04
1.004609e-01 -1.165497e-03
1.004609e-01 6.092814e-03
1.004649e-01 -1.879580e-03
1.004705e-01 -1.329239e-03
1.004725e-01 1.595653e-03
1.004760e-01 3.321228e-04
1.004760e-01 8.836172e-04
1.004789e-01 8.914778e-05
1.004829e-01 5.397975e-03
1.004889e-01 -5.322976e-03
1.005001e-01 -1.047534e-03
1.005246e-01 5.481078e-03
1.005348e-01 -2.642254e-03
1.005470e-01 1.351324e-03
1.005483e-01 5.182826e-03
1.005527e-01 6.736456e-03
1.005549e-01 -1.923197e-03
1.005575e-01 -3.123334e-04
1.005611e-01 6.194293e-04
1.005736e-01 6.281596e-04
1.005777e-01 3.932918e-03
1.005872e-01 2.353827e-03
1.006005e-01 -2.210339e-03
1.006080e-01 1.002949e-03
1.006223e-01 -2.286442e-03
1.006237e-01 6.308616e-03
1.006295e-01 4.773334e-03
1.006351e-01 1.524363e-03
1.006370e-01 1.542091e-03
1.006509e-01 -1.110286e-03
1.006572e-01 3.040552e-03
1.006693e-01 5.648839e-04
1.006724e-01 3.960119e-03
1.006756e-01 -1.554645e-04
1.006808e-01 -4.671744e-04
1.006933e-01 -1.463142e-03
1.007133e-01 -2.224391e-03
1.007276e-01 1.532487e-03
1.007283e-01 1.059518e-03
1.007546e-01 -8.266102e-04
1.007574e-01 5.045651e-03
1.007589e-01 3.668278e-03
1.007611e-01 2.491934e-03
1.007633e-01 6.715996e-04
1.007860e-01 2.465365e-03
1.007886e-01 7.040936e-04
1.007893e-01 -2.759814e-03
1.007955e-01 -4.732754e-04
1.008007e-01 2.295948e-03
1.008033e-01 -2.836525e-03
1.008147e-01 -3.043465e-04
1.008165e-01 2.625338e-04
1.008188e-01 -1.117591e-03
1.008211e-01 6.794708e-04
1.008254e-01 2.135537e-04
1.008274e-01 2.193347e-03
1.008284e-01 6.874226e-03
1.008375e-01 -1.008403e-03
1.008392e-01 -1.224176e-03
1.008460e-01 5.036368e-04
1.008558e-01 -1.764239e-03
1.008572e-01 8.138579e-04
1.008625e-01 3.254560e-03
1.008636e-01 3.502419e-03
1.008693e-01 1.221256e-03
1.008723e-01 -4.010796e-03
1.008937e-01 4.040354e-03
1.009108e-01 -3.378603e-04
1.009153e-01 -1.072738e-03
1.009168e-01 1.789589e-03
1.009192e-01 3.774664e-03
1.009344e-01 4.405078e-03
1.009503e-01 -3.027414e-04
1.009574e-01 9.143158e-04
1.009579e-01 -8.083518e-04
1.009636e-01 -3.736478e-04
1.009658e-01 -1.225750e-03
1.009759e-01 2.013785e-03
1.009773e-01 2.197930e-03
1.009877e-01 -2.584669e-03
1.009891e-01 8.331024e-05
1.010173e-01 -3.297359e-03
1.010233e-01 1.566174e-03
1.010326e-01 -1.008905e-03
1.010449e-01 2.500763e-03
1.010449e-01 4.950345e-04
1.010488e-01 4.378669e-04
1.010612e-01 -6.399792e-04
1.010706e-01 -3.646154e-04
1.010792e-01 1.001500e-03
1.010864e-01 1.933158e-03
1.010969e-01 4.200607e-03
1.010969e-01 4.200607e-03
1.011020e-01 -3.164442e-03
1.011151e-01 1.364580e-03
1.011196e-01 9.374561e-04
1.011260e-01 2.019282e-03
1.011271e-01 8.197908e-04
1.011289e-01 5.724121e-03
1.011400e-01 1.491720e-03
1.011410e-01 1.339561e-04
1.011434e-01 -4.752459e-03
1.011527e-01 2.666637e-04
1.011599e-01 2.089195e-03
1.011696e-01 -1.887880e-03
1.012024e-01 2.906757e-05
1.012180e-01 1.260551e-03
1.012184e-01 1.218822e-03
1.012195e-01 -2.621610e-03
1.012225e-01 -2.153425e-03
1.012332e-01 9.747483e-04
1.012362e-01 2.181759e-03
1.012604e-01 1.555170e-03
1.012613e-01 -5.489341e-04
1.012702e-01 -1.051029e-03
1.012723e-01 2.559024e-03
1.012729e-01 -1.666719e-03
1.012869e-01 -2.549841e-03
1.012869e-01 -2.549841e-03
1.013044e-01 -1.245686e-03
1.013136e-01 1.311884e-03
1.013245e-01 6.087113e-03
1.013258e-01 6.331467e-04
1.013267e-01 -2.057280e-04
1.013528e-01 -2.067740e-03
1.013609e-01 2.119164e-03
1.013612e-01 -2.409269e-03
1.013680e-01 -4.341733e-05
1.013718e-01 1.931300e-03
1.013737e-01 3.093160e-03
1.013768e-01 -2.137195e-03
1.013836e-01 -7.244495e-04
1.013949e-01 1.262721e-03
1.014074e-01 -3.069659e-03
1.014077e-01 4.933896e-03
1.014095e-01 2.262304e-03
1.014128e-01 2.781592e-03
1.014130e-01 8.220346e-04
1.014148e-01 2.487835e-03
1.014188e-01 3.706387e-03
1.014239e-01 1.594257e-03
1.014345e-01 6.030098e-03
1.014450e-01 -1.302903e-03
1.014526e-01 -4.980176e-04
1.014538e-01 -5.756966e-04
1.014731e-01 -8.143123e-04
1.014788e-01 -3.261442e-04
1.014833e-01 1.311911e-03
1.015085e-01 -1.192688e-03
1.015184e-01 2.138228e-04
1.015403e-01 1.736769e-03
1.015659e-01 1.897719e-03
1.015945e-01 1.314929e-03
1.016290e-01 -6.833977e-04
1.016290e-01 -6.833977e-04
1.016298e-01 2.607344e-03
1.016334e-01 -2.301717e-04
1.016382e-01 -1.527244e-03
1.016427e-01 4.474954e-03
1.016445e-01 6.866723e-04
1.016585e-01 -4.251590e-04
1.016879e-01 2.368337e-04
1.016899e-01 -1.824853e-03
1.016914e-01 2.641519e-03
1.017041e-01 1.250071e-03
1.017087e-01 -1.169494e-03
1.017181e-01 6.972651e-03
1.017198e-01 2.088862e-03
1.017219e-01 1.016478e-03
1.017239e-01 2.398689e-03
1.017363e-01 -1.556481e-03
1.017390e-01 1.012748e-02
1.017523e-01 -2.154849e-03
1.017531e-01 9.503852e-04
1.017533e-01 -1.549635e-03
1.017565e-01 1.221107e-03
1.017581e-01 8.398710e-04
1.017585e-01 5.994656e-03
1.017835e-01 1.155816e-03
1.018045e-01 -2.270018e-03
1.018073e-01 2.206565e-03
1.018076e-01 -9.219442e-04
1.018080e-01 7.492686e-04
1.018254e-01 1.217895e-03
1.018295e-01 -5.206133e-04
1.018307e-01 1.733280e-03
1.018363e-01 3.799215e-04
1.018391e-01 1.180761e-03
1.018485e-01 4.047659e-03
1.018594e-01 4.932954e-03
1.018682e-01 2.264920e-03
1.018690e-01 1.197081e-03
1.018748e-01 -1.612968e-03
1.018788e-01 2.608056e-03
1.018803e-01 1.118779e-03
1.018886e-01 3.129427e-03
1.018892e-01 4.385204e-03
1.018940e-01 -1.844616e-03
1.019019e-01 2.018667e-03
1.019135e-01 -4.192065e-03
1.019142e-01 -2.544239e-03
1.019184e-01 -1.109045e-03
1.019342e-01 7.915993e-04
1.019398e-01 2.862488e-03
1.019517e-01 -3.033775e-03
1.019552e-01 8.362994e-04
1.019634e-01 -6.942944e-04
1.019663e-01 7.595095e-04
1.019711e-01 1.222673e-03
1.019763e-01 3.860239e-03
1.019935e-01 -7.609550e-04
1.020012e-01 -6.647521e-04
1.020123e-01 1.002412e-03
1.020130e-01 -1.132511e-03
1.020152e-01 8.857070e-05
1.020177e-01 1.312746e-03
1.020278e-01 2.685231e-03
1.020344e-01 -1.953413e-04
1.020416e-01 1.862423e-03
1.020553e-01 -1.336880e-03
1.020593e-01 -2.111395e-03
1.020622e-01 8.257753e-04
1.020676e-01 -2.353204e-03
1.020742e-01 -2.551148e-03
1.020758e-01 8.579637e-04
1.020821e-01 -6.881886e-05
1.020881e-01 -8.746376e-04
1.021085e-01 -2.541629e-04
1.021194e-01 -2.687206e-03
1.021305e-01 1.247116e-03
1.021373e-01 1.059350e-03
1.021409e-01 -3.643387e-03
1.021442e-01 2.515160e-03
1.021481e-01 8.027081e-03
1.021593e-01 1.406228e-03
1.021638e-01 -5.859808e-03
1.021881e-01 -3.896191e-03
1.021884e-01 1.935015e-03
1.021919e-01 -3.499051e-03
1.021936e-01 8.427221e-04
1.021965e-01 1.818005e-03
1.022067e-01 -1.770512e-03
1.022151e-01 2.464577e-04
1.022299e-01 -3.430370e-03
1.022378e-01 -1.450102e-03
1.022391e-01 2.545290e-04
1.022431e-01 8.893295e-04
1.022451e-01 2.962427e-03
1.022457e-01 3.576653e-03
1.022556e-01 9.789583e-04
1.022699e-01 -1.846663e-03
1.022708e-01 5.712596e-04
1.022782e-01 -9.727705e-04
1.022792e-01 2.294206e-03
1.022814e-01 -7.009097e-04
1.022989e-01 -2.722019e-03
1.023006e-01 9.889479e-04
1.023131e-01 1.419186e-03
1.023227e-01 -8.112493e-04
1.023248e-01 1.015539e-03
1.023331e-01 4.697582e-04
1.023431e-01 -4.975968e-04
1.023720e-01 1.134442e-03
1.023784e-01 1.976129e-03
1.023831e-01 6.511478e-03
1.023869e-01 2.548896e-03
1.023878e-01 -3.876108e-05
1.023885e-01 1.626035e-03
1.023928e-01 2.263800e-03
1.023942e-01 -1.576566e-03
1.023942e-01 -1.576566e-03
1.023965e-01 -4.308019e-05
1.024034e-01 -1.821021e-03
1.024060e-01 -4.308788e-04
1.024325e-01 -1.951253e-04
1.024334e-01 2.319251e-03
1.024364e-01 -2.648722e-03
1.024432e-01 7.793021e-04
1.024488e-01 1.315746e-03
1.024553e-01 -1.328999e-04
1.024632e-01 -3.675590e-04
1.024698e-01 2.448652e-03
1.024711e-01 2.458427e-03
1.024802e-01 2.705077e-03
1.024933e-01 2.785937e-03
1.024959e-01 1.124418e-03
1.025051e-01 1.899333e-04
1.025078e-01 8.276186e-05
1.025084e-01 4.425955e-03
1.025084e-01 4.425955e-03
1.025152e-01 4.006947e-03
1.025184e-01 3.517999e-03
1.025197e-01 4.524526e-03
1.025214e-01 -1.284771e-03
1.025470e-01 2.828847e-03
1.025501e-01 2.872032e-04
1.025621e-01 -3.332592e-03
1.025642e-01 5.146747e-03
1.025683e-01 5.460512e-04
1.025732e-01 -4.259016e-04
1.025738e-01 6.908217e-04
1.025771e-01 -3.985588e-04
1.025861e-01 -1.902654e-03
1.025862e-01 -2.272235e-03
1.025869e-01 8.994068e-04
1.025923e-01 -1.380552e-03
1.026037e-01 4.800717e-04
1.026044e-01 1.434312e-03
1.026069e-01 2.047449e-03
1.026083e-01 2.838921e-03
1.026099e-01 3.869351e-03
1.026341e-01 -3.098416e-03
1.026413e-01 6.896765e-04
1.026464e-01 1.433939e-04
1.026500e-01 -7.111324e-05
1.026531e-01 7.375158e-04
1.026609e-01 -2.664834e-03
1.026664e-01 -5.404223e-04
1.026747e-01 -5.120932e-04
1.026884e-01 1.907991e-03
1.026917e-01 1.617127e-03
1.026917e-01 1.617127e-03
1.026966e-01 2.069101e-03
1.027015e-01 -2.695846e-03
1.027029e-01 1.454241e-03
1.027080e-01 6.857277e-03
1.027116e-01 -3.087167e-04
1.027125e-01 -2.785179e-03
1.027160e-01 -2.302589e-03
1.027246e-01 9.916917e-04
1.027386e-01 -5.282727e-04
1.027392e-01 1.029818e-03
1.027607e-01 1.729531e-03
1.027811e-01 4.300427e-04
1.027879e-01 -1.470553e-03
1.027902e-01 4.347302e-04
1.027937e-01 -2.406558e-03
1.027957e-01 -1.922091e-03
1.028010e-01 3.565660e-04
1.028014e-01 1.372612e-03
1.028092e-01 7.776906e-04
1.028102e-01 4.352561e-03
1.028119e-01 5.372643e-03
1.028150e-01 -9.401206e-04
1.028253e-01 -3.865697e-04
1.028287e-01 1.858804e-03
1.028344e-01 6.302734e-03
1.028426e-01 7.121111e-05
1.028447e-01 4.105572e-03
1.028585e-01 -1.171393e-03
1.028705e-01 8.602878e-04
1.028710e-01 -3.072889e-04
1.028723e-01 -1.103389e-03
1.028757e-01 8.734082e-04
1.028822e-01 1.852027e-04
1.028939e-01 -1.269245e-03
1.029029e-01 -6.365428e-04
1.029045e-01 4.984966e-04
1.029160e-01 1.644736e-03
1.029160e-01 1.644736e-03
1.029207e-01 7.415430e-04
1.029372e-01 1.109066e-03
1.029388e-01 2.432096e-03
1.029400e-01 6.580248e-03
1.029489e-01 -2.269121e-03
1.029494e-01 -1.155779e-03
1.029551e-01 -2.324625e-03
1.029576e-01 -5.515778e-04
1.029593e-01 -3.359501e-03
1.029681e-01 5.825757e-03
1.029681e-01 5.825757e-03
1.029750e-01 2.796644e-03
1.030166e-01 2.046501e-03
1.030212e-01 -1.954075e-03
1.030279e-01 -1.019070e-03
1.030339e-01 -5.503541e-04
1.030510e-01 1.486461e-03
1.030753e-01 -4.975121e-04
1.030825e-01 1.224271e-03
1.030851e-01 2.264415e-03
1.030852e-01 5.332164e-03
1.030934e-01 8.185960e-04
1.030983e-01 -6.099851e-04
1.030990e-01 -2.209654e-03
1.031024e-01 -1.153197e-03
1.031052e-01 -2.227512e-03
1.031059e-01 -8.093970e-05
1.031104e-01 -2.764329e-04
1.031180e-01 1.559164e-03
1.031233e-01 -1.328346e-03
1.031311e-01 8.935757e-04
1.031476e-01 -5.185647e-04
1.031485e-01 4.446347e-04
1.031542e-01 1.380369e-03
1.031563e-01 -5.161465e-03
1.031605e-01 5.170323e-04
1.031634e-01 1.523725e-03
1.031701e-01 -3.746671e-04
1.031724e-01 -2.449927e-03
1.031753e-01 -6.953362e-04
1.031807e-01 3.879404e-03
1.031833e-01 5.417343e-04
1.031856e-01 -7.666715e-04
1.031865e-01 3.838639e-03
1.031921e-01 -2.967935e-05
1.031933e-01 2.753677e-03
1.032013e-01 -2.249234e-03
1.032061e-01 -1.501924e-03
1.032082e-01 1.223283e-03
1.032141e-01 -1.032414e-03
1.032152e-01 -1.202890e-03
1.032359e-01 5.565708e-03
1.032365e-01 -2.275104e-04
1.032429e-01 1.895836e-03
1.032440e-01 3.218131e-04
1.032470e-01 -2.211460e-04
1.032491e-01 1.864182e-03
1.032496e-01 -1.751774e-03
1.032560e-01 4.641270e-03
1.032681e-01 2.891193e-03
1.032849e-01 -1.019165e-03
1.032854e-01 5.915666e-03
1.032860e-01 1.883599e-03
1.032862e-01 -1.549101e-04
1.032944e-01 -2.371817e-03
1.033009e-01 2.411335e-03
1.033120e-01 -4.232801e-04
1.033145e-01 1.149690e-03
1.033181e-01 7.540074e-04
1.033313e-01 -2.264584e-04
1.033313e-01 -2.264584e-04
1.033341e-01 1.725455e-03
1.033413e-01 1.119636e-03
1.033613e-01 -2.002170e-03
1.033664e-01 2.969925e-03
1.033702e-01 6.927282e-04
1.033858e-01 -9.696413e-04
1.033933e-01 1.022237e-03
1.034138e-01 7.253366e-04
1.034352e-01 -4.918137e-03
1.034404e-01 2.232397e-04
1.034580e-01 1.601251e-03
1.034597e-01 -2.949667e-03
1.034715e-01 -1.112893e-03
1.034740e-01 2.521999e-03
1.034747e-01 -1.935781e-03
1.034747e-01 -1.935781e-03
1.034779e-01 8.849052e-05
1.034854e-01 -1.002879e-03
1.034895e-01 4.020261e-03
1.034918e-01 2.105740e-04
1.035185e-01 8.679473e-04
1.035192e-01 1.068805e-03
1.035223e-01 -5.346379e-03
1.035245e-01 -4.476157e-04
1.035273e-01 3.674229e-03
1.035373e-01 -1.807556e-03
1.035439e-01 -1.797396e-03
1.035460e-01 -5.535050e-04
1.035484e-01 -5.782584e-04
1.035516e-01 2.484875e-03
1.035583e-01 8.415983e-04
1.035636e-01 4.060731e-03
1.035706e-01 5.136396e-03
1.035841e-01 3.506086e-03
1.036205e-01 1.137584e-03
1.036244e-01 8.931734e-04
1.036280e-01 -2.454667e-03
1.036531e-01 2.387521e-03
1.036538e-01 -4.456894e-04
1.036596e-01 3.883221e-03
1.036711e-01 -3.675441e-04
1.036741e-01 7.923706e-04
1.036748e-01 3.498781e-03
1.036977e-01 1.186863e-03
1.037227e-01 5.421571e-03
1.037230e-01 -2.094490e-03
1.037432e-01 -2.641243e-04
1.037560e-01 -1.469820e-04
1.037561e-01 -4.687343e-04
1.037737e-01 4.553050e-03
1.037779e-01 -2.010457e-04
1.037809e-01 -6.617700e-04
1.037813e-01 1.484295e-03
1.037829e-01 1.308133e-03
1.037901e-01 3.720677e-04
1.037986e-01 -3.006231e-05
1.037986e-01 -3.006231e-05
1.038069e-01 -4.001695e-04
1.038102e-01 -3.279906e-04
1.038106e-01 2.242267e-04
1.038124e-01 -9.932264e-04
1.038334e-01 1.908744e-03
1.038334e-01 1.908744e-03
1.038436e-01 -2.372675e-04
1.038480e-01 1.438605e-03
1.038534e-01 1.954839e-03
1.038537e-01 2.307273e-03
1.038618e-01 2.077114e-04
1.038665e-01 7.900487e-04
1.038705e-01 1.268974e-03
1.038820e-01 4.910405e-04
1.038847e-01 2.064786e-03
1.038847e-01 2.064786e-03
1.038858e-01 -1.102893e-04
1.038927e-01 -9.850009e-04
1.039059e-01 3.564828e-03
1.039241e-01 4.766879e-04
1.039284e-01 7.981106e-04
1.039338e-01 1.491441e-03
1.039414e-01 -2.142489e-03
1.039414e-01 -2.142489e-03
1.039525e-01 1.778109e-03
1.039588e-01 -4.765872e-04
1.039669e-01 7.593547e-04
1.039694e-01 8.071757e-05
1.039759e-01 -1.468615e-03
1.039776e-01 4.518988e-04
1.039798e-01 1.487521e-03
1.039912e-01 1.688476e-03
1.039926e-01 3.849820e-04
1.039960e-01 -4.494770e-04
1.040132e-01 -9.629789e-04
1.040148e-01 9.531319e-05
1.040170e-01 1.350094e-04
1.040228e-01 3.052820e-03
1.040232e-01 3.733936e-03
1.040262e-01 -1.964768e-03
1.040264e-01 -1.549762e-03
1.040345e-01 5.223943e-03
1.040379e-01 9.746014e-04
1.040509e-01 -1.006781e-03
1.040522e-01 6.093536e-04
1.040753e-01 4.485808e-03
1.040815e-01 -1.042515e-03
1.040821e-01 8.022005e-04
1.040836e-01 -1.273734e-03
1.041017e-01 -9.659868e-04
1.041091e-01 7.961559e-04
1.041294e-01 8.726693e-04
1.041354e-01 -3.191798e-03
1.041486e-01 -4.908368e-04
1.041762e-01 3.871659e-03
1.041841e-01 -1.657737e-03
1.041955e-01 3.386381e-04
1.042211e-01 9.806917e-04
1.042400e-01 -1.286833e-03
1.042521e-01 -1.777852e-03
1.042666e-01 -2.779361e-03
1.042671e-01 -2.101113e-03
1.042710e-01 1.004859e-03
1.042731e-01 1.137633e-03
1.042791e-01 3.928221e-03
1.042848e-01 -1.600427e-03
1.042885e-01 -9.976789e-04
1.042905e-01 7.001445e-04
1.042923e-01 -2.945168e-04
1.042928e-01 -5.443780e-04
1.043009e-01 3.589344e-03
1.043011e-01 2.843576e-03
1.043032e-01 -1.579188e-03
1.043096e-01 -2.194637e-03
1.043106e-01 6.394487e-04
1.043171e-01 2.729202e-04
1.043426e-01 2.926408e-03
1.043444e-01 8.185154e-04
1.043448e-01 6.225423e-03
1.043473e-01 1.733028e-03
1.043567e-01 -4.592741e-03
1.043614e-01 -4.527507e-04
1.043635e-01 -2.145145e-03
1.043657e-01 2.071535e-03
1.043685e-01 -2.707716e-03
1.043871e-01 8.470446e-04
1.044059e-01 1.633739e-03
1.044124e-01 -9.035519e-04
1.044135e-01 1.497850e-03
1.044200e-01 2.939461e-03
1.044205e-01 -4.161088e-04
1.044294e-01 1.948899e-03
1.044540e-01 3.492243e-04
1.044649e-01 1.960257e-03
1.044717e-01 4.834499e-03
1.044758e-01 5.872598e-03
1.044766e-01 5.439006e-04
1.044784e-01 -1.503640e-04
1.044950e-01 -1.839758e-03
1.044959e-01 -1.875705e-03
1.045020e-01 -8.666875e-04
1.045034e-01 1.241376e-03
1.045125e-01 -3.468741e-04
1.045157e-01 -3.120031e-03
1.045239e-01 3.418351e-03
1.045263e-01 1.710756e-03
1.045405e-01 -2.350778e-03
1.045476e-01 -1.665681e-03
1.045484e-01 1.043096e-03
1.045636e-01 2.544367e-03
1.045652e-01 4.134822e-03
1.045808e-01 4.473066e-03
1.045866e-01 1.093539e-03
1.045917e-01 -1.383879e-03
1.045939e-01 2.922975e-03
1.045947e-01 -1.344626e-03
1.046014e-01 1.171255e-03
1.046112e-01 1.752855e-03
1.046225e-01 -2.543199e-03
1.046349e-01 -1.927925e-03
1.046371e-01 -6.458824e-04
1.046468e-01 1.246549e-03
1.046575e-01 6.141562e-04
1.046600e-01 2.273093e-03
1.046652e-01 1.097578e-04
1.046759e-01 3.453140e-04
1.046878e-01 -6.801622e-04
1.046926e-01 2.124247e-03
1.046962e-01 2.281656e-03
1.047002e-01 1.473811e-03
1.047015e-01 3.948692e-04
1.047031e-01 -3.248360e-03
1.047082e-01 1.357383e-04
1.047091e-01 -1.089098e-03
1.047100e-01 1.349084e-03
1.047117e-01 4.078442e-03
1.047253e-01 3.193162e-04
1.047640e-01 1.757605e-03
1.047644e-01 4.573452e-04
1.047762e-01 3.589333e-03
1.047914e-01 3.331412e-04
1.047926e-01 -8.177268e-04
1.047993e-01 5.556020e-03
1.048013e-01 1.838072e-03
1.048058e-01 3.928552e-03
1.048085e-01 -8.154716e-04
1.048143e-01 -1.630873e-03
1.048146e-01 -1.206230e-03
1.048216e-01 1.263266e-03
1.048379e-01 -6.032027e-04
1.048410e-01 1.421875e-03
1.048473e-01 -9.998737e-04
1.048491e-01 -4.410151e-04
1.048518e-01 7.122432e-05
1.048627e-01 5.032840e-03
1.048664e-01 -4.993901e-04
1.048734e-01 9.378992e-04
1.048735e-01 -2.095300e-03
1.048894e-01 3.198959e-03
1.048960e-01 -1.769364e-03
1.048967e-01 -1.514347e-03
1.049009e-01 -1.567056e-04
1.049042e-01 -4.899220e-03
1.049143e-01 3.375058e-04
1.049210e-01 -9.551060e-04
1.049416e-01 4.791909e-04
1.049532e-01 2.013752e-03
1.049689e-01 1.213024e-03
1.049826e-01 3.508032e-03
1.049900e-01 1.902691e-03
1.049975e-01 3.672764e-03
1.050139e-01 -2.688898e-04
1.050145e-01 5.653552e-05
1.050199e-01 1.858444e-04
1.050340e-01 -2.275911e-03
1.050545e-01 2.596228e-03
1.050581e-01 4.408770e-04
1.050636e-01 -5.898212e-04
1.050678e-01 -2.808560e-03
1.050880e-01 -9.833761e-04
1.050925e-01 -1.431604e-03
1.051062e-01 1.513381e-03
1.051134e-01 8.236747e-04
1.051158e-01 1.800121e-03
1.051246e-01 -2.660118e-03
1.051269e-01 -1.094407e-03
1.051286e-01 -3.613031e-04
1.051414e-01 1.790885e-04
1.051602e-01 4.222834e-04
1.051755e-01 1.019076e-03
1.051799e-01 -7.805784e-04
1.051914e-01 3.181218e-03
1.051951e-01 -1.633952e-04
1.051983e-01 1.739402e-03
1.052209e-01 -2.870166e-03
1.052239e-01 -3.319987e-04
1.052244e-01 4.178918e-03
1.052294e-01 -2.980968e-03
1.052294e-01 -2.980968e-03
1.052343e-01 -2.168999e-03
1.052380e-01 2.421972e-04
1.052394e-01 -2.985062e-03
1.052399e-01 -1.665122e-03
1.052423e-01 -1.841840e-03
1.052436e-01 4.198138e-03
1.052465e-01 2.910878e-03
1.052652e-01 8.054563e-04
1.052690e-01 -1.165218e-03
1.052710e-01 -1.734599e-03
1.052777e-01 4.737306e-04
1.052810e-01 2.836382e-04
1.052913e-01 3.943218e-03
1.052921e-01 9.416948e-04
1.052959e-01 1.273250e-03
1.052961e-01 -1.483690e-03
1.052972e-01 1.971429e-03
1.053006e-01 -1.279006e-03
1.053032e-01 -4.944477e-04
1.053033e-01 -6.334276e-04
1.053070e-01 5.453287e-04
1.053375e-01 1.278961e-03
1.053539e-01 -1.334060e-03
1.053571e-01 4.242555e-03
1.053583e-01 1.061106e-03
1.053747e-01 2.149966e-03
1.053801e-01 -1.473472e-03
1.053825e-01 1.820385e-03
1.053924e-01 1.284115e-03
1.054042e-01 -9.203905e-04
1.054076e-01 3.096241e-03
1.054379e-01 -1.134027e-03
1.054415e-01 5.142320e-03
1.054449e-01 3.042139e-03
1.054490e-01 -2.041864e-03
1.054565e-01 1.624199e-03
1.054671e-01 -9.826108e-04
1.054840e-01 7.081823e-05
1.054851e-01 4.663879e-04
1.054851e-01 4.663879e-04
1.054882e-01 -6.294753e-05
1.054895e-01 -3.628221e-04
1.054958e-01 3.006002e-03
1.055023e-01 -2.377548e-03
1.055122e-01 -9.601726e-05
1.055155e-01 -2.100261e-04
1.055209e-01 -7.571149e-04
1.055209e-01 -7.571149e-04
1.055211e-01 8.719954e-04
1.055224e-01 2.928374e-04
1.055262e-01 8.238599e-04
1.055263e-01 4.071048e-03
1.055341e-01 6.968466e-05
1.055495e-01 -2.308197e-03
1.055890e-01 9.179033e-04
1.055996e-01 -5.681808e-04
1.056002e-01 2.120290e-03
1.056028e-01 1.679822e-03
1.056031e-01 -3.250916e-05
1.056048e-01 -1.146304e-03
1.056096e-01 2.096352e-03
1.056176e-01 3.404399e-03
1.056181e-01 -1.423474e-03
1.056280e-01 -1.163892e-04
1.056334e-01 -3.633808e-03
1.056410e-01 -1.969281e-03
1.056481e-01 -6.570942e-04
1.056483e-01 2.431469e-04
1.056497e-01 2.234573e-03
1.056516e-01 -5.569922e-04
1.056531e-01 -1.255825e-04
1.056540e-01 2.360348e-03
1.056568e-01 3.159916e-04
1.056685e-01 1.196561e-03
1.056741e-01 1.685280e-03
1.056755e-01 -4.467083e-04
1.056864e-01 6.912712e-04
1.056870e-01 1.087629e-03
1.056891e-01 8.761293e-07
1.056933e-01 -2.011918e-03
1.056943e-01 1.794796e-03
1.056958e-01 5.597653e-03
1.056977e-01 9.398645e-04
1.057010e-01 2.012693e-03
1.057084e-01 1.384745e-03
1.057290e-01 -3.820280e-04
1.057323e-01 4.843479e-03
1.057337e-01 1.467054e-03
1.057359e-01 -2.211501e-04
1.057382e-01 4.065805e-03
1.057397e-01 6.361248e-04
1.057397e-01 6.361248e-04
1.057408e-01 3.524578e-03
1.057591e-01 1.949515e-04
1.057596e-01 -1.037364e-03
1.057673e-01 6.789141e-04
1.057764e-01 4.379777e-03
1.057765e-01 1.336870e-03
1.057794e-01 -6.319501e-04
1.057831e-01 -2.307189e-03
1.057907e-01 -4.340477e-04
1.057908e-01 1.446000e-03
1.058007e-01 -1.371999e-03
1.058011e-01 -2.918591e-03
1.058059e-01 1.908491e-03
1.058106e-01 5.709770e-04
1.058152e-01 3.202667e-03
1.058374e-01 8.952658e-04
1.058394e-01 1.531291e-03
1.058414e-01 4.478317e-03
1.058451e-01 1.454599e-03
1.058625e-01 5.676248e-03
1.058657e-01 3.911654e-04
1.058682e-01 1.142697e-03
1.058745e-01 -7.509213e-04
1.058867e-01 1.200217e-03
1.058987e-01 -2.589657e-03
1.059056e-01 4.059946e-03
1.059071e-01 -5.655071e-03
1.059159e-01 -2.100215e-03
1.059271e-01 -6.026245e-04
1.059439e-01 1.880774e-04
1.059533e-01 4.838932e-05
1.059552e-01 -1.604347e-03
1.059610e-01 -1.813859e-03
1.059760e-01 1.777586e-04
1.059785e-01 8.289800e-04
1.059813e-01 6.154447e-03
1.059828e-01 3.256941e-04
1.059855e-01 4.575286e-05
1.059889e-01 -7.092193e-04
1.059914e-01 1.998217e-03
1.059914e-01 1.998217e-03
1.059926e-01 3.495215e-03
1.059977e-01 -1.839080e-03
1.060095e-01 2.279474e-03
1.060160e-01 1.302641e-03
1.060391e-01 4.645782e-03
1.060553e-01 5.025495e-03
1.060554e-01 5.866634e-04
1.060589e-01 2.061189e-03
1.060667e-01 -4.901751e-04
1.060738e-01 -9.756414e-04
1.060811e-01 -1.357729e-03
1.060834e-01 -1.649653e-03
1.060843e-01 -2.659150e-04
1.060843e-01 -2.659150e-04
1.060937e-01 -1.368967e-03
1.061027e-01 -2.098761e-03
1.061049e-01 -2.379861e-04
1.061132e-01 -5.017603e-04
1.061161e-01 -1.569224e-03
1.061166e-01 -1.741003e-03
1.061172e-01 -1.077850e-03
1.061194e-01 -1.340065e-03
1.061268e-01 5.255228e-03
1.061291e-01 3.637457e-03
1.061321e-01 -9.444291e-04
1.061369e-01 -6.548712e-04
1.061580e-01 1.942330e-03
1.061712e-01 6.543888e-04
1.061924e-01 -7.513832e-04
1.061942e-01 -3.151889e-03
1.061959e-01 -1.155295e-03
1.062052e-01 2.549124e-03
1.062076e-01 -6.133945e-04
1.062099e-01 -8.243196e-04
1.062161e-01 -1.631475e-03
1.062347e-01 3.663366e-03
1.062379e-01 -8.159586e-04
1.062421e-01 -8.045095e-04
1.062456e-01 7.959118e-04
1.062467e-01 1.203077e-03
1.062495e-01 -4.270936e-04
1.062666e-01 -1.267218e-03
1.062880e-01 5.459964e-03
1.062986e-01 9.334743e-04
1.063098e-01 1.505905e-03
1.063119e-01 -9.883895e-04
1.063163e-01 -1.799260e-03
1.063227e-01 -9.335424e-05
1.063230e-01 9.701936e-04
1.063294e-01 5.924958e-03
1.063297e-01 -3.097850e-04
1.063316e-01 3.399262e-03
1.063316e-01 3.399262e-03
1.063554e-01 -1.374269e-03
1.063623e-01 1.313399e-03
1.063634e-01 -1.000137e-04
1.063645e-01 1.272790e-03
1.063665e-01 -2.791493e-03
1.063713e-01 -6.059402e-04
1.063749e-01 1.268316e-03
1.063790e-01 9.781296e-04
1.063866e-01 2.276287e-03
1.063975e-01 -1.152305e-03
1.064027e-01 -2.893095e-03
1.064190e-01 1.462223e-03
1.064255e-01 -3.284566e-04
1.064279e-01 1.197734e-03
1.064283e-01 -1.663299e-03
1.064339e-01 2.427893e-03
1.064365e-01 3.677840e-03
1.064374e-01 9.382924e-05
1.064475e-01 6.583994e-03
1.064537e-01 2.853065e-03
1.064548e-01 4.270114e-04
1.064564e-01 2.427633e-03
1.064578e-01 1.544346e-04
1.064606e-01 3.307634e-03
1.064606e-01 3.307634e-03
1.064637e-01 -1.223539e-03
1.064728e-01 -1.566261e-03
1.064730e-01 4.655546e-04
1.064906e-01 -3.022991e-03
1.064942e-01 5.022023e-03
1.064947e-01 -1.592358e-03
1.065035e-01 1.281983e-03
1.065130e-01 -2.399650e-03
1.065228e-01 2.041100e-03
1.065240e-01 -2.209731e-03
1.065288e-01 5.908393e-04
1.065376e-01 3.442458e-03
1.065406e-01 1.731863e-03
1.065439e-01 -1.199086e-03
1.065451e-01 -2.324728e-03
1.065457e-01 5.122067e-03
1.065572e-01 -8.349205e-04
1.065625e-01 -2.268433e-03
1.065627e-01 7.616639e-04
1.065773e-01 -2.987763e-03
1.065791e-01 7.765785e-04
1.066060e-01 -8.672478e-04
1.066103e-01 1.144718e-03
1.066115e-01 3.127179e-03
1.066123e-01 1.693623e-03
1.066210e-01 2.250981e-03
1.066228e-01 -1.568645e-03
1.066313e-01 -1.754540e-03
1.066340e-01 -5.811652e-04
1.066408e-01 8.571384e-04
1.066434e-01 5.850232e-05
1.066535e-01 -2.434699e-03
1.066574e-01 3.588689e-03
1.066713e-01 2.906640e-03
1.066738e-01 2.810412e-03
1.066981e-01 5.361200e-03
1.067055e-01 -8.747265e-04
1.067137e-01 6.062084e-04
1.067147e-01 2.002174e-03
1.067171e-01 4.703382e-03
1.067223e-01 1.708282e-03
1.067225e-01 2.784989e-03
1.067380e-01 4.730215e-04
1.067440e-01 -3.250743e-03
1.067698e-01 -2.304414e-03
1.067764e-01 4.764320e-03
1.067769e-01 2.009768e-03
1.067836e-01 1.249670e-03
1.067851e-01 -1.122919e-04
1.067867e-01 3.094652e-04
1.067867e-01 3.094652e-04
1.067876e-01 3.327410e-03
1.067997e-01 8.863185e-04
1.068060e-01 1.872972e-03
1.068060e-01 1.872972e-03
1.068068e-01 2.764977e-03
1.068232e-01 -4.181492e-03
1.068258e-01 -1.108553e-03
1.068258e-01 -1.108553e-03
1.068483e-01 -1.124152e-04
1.068661e-01 1.575764e-03
1.068743e-01 3.825689e-03
1.068810e-01 3.650977e-04
1.068919e-01 3.524899e-03
1.068959e-01 -2.338561e-03
1.069031e-01 -1.319381e-03
1.069296e-01 -1.390912e-04
1.069341e-01 -3.182664e-03
1.069532e-01 -2.174265e-03
1.069558e-01 5.443129e-03
1.069577e-01 -2.477530e-03
1.069673e-01 -1.254739e-03
1.069726e-01 3.521485e-03
1.069812e-01 2.178782e-03
1.069813e-01 2.015033e-03
1.069866e-01 -6.249078e-04
1.069868e-01 2.394037e-03
1.069917e-01 -2.568067e-03
1.070027e-01 1.416754e-04
1.070058e-01 -1.690679e-03
1.070144e-01 -1.280593e-03
1.070430e-01 6.720048e-03
1.070561e-01 -1.119247e-04
1.070595e-01 -8.880881e-04
1.070698e-01 -8.963512e-04
1.070863e-01 -3.551978e-03
1.071023e-01 3.415497e-04
1.071070e-01 1.292912e-03
1.071130e-01 -2.317858e-03
1.071282e-01 -2.236375e-06
1.071351e-01 -1.410508e-04
1.071464e-01 -2.288564e-03
1.071631e-01 -7.195896e-04
1.071659e-01 1.877151e-03
1.071704e-01 -2.557494e-03
1.071936e-01 2.323141e-04
1.071960e-01 3.937221e-04
1.072036e-01 2.687686e-03
1.072040e-01 3.005987e-03
1.072058e-01 1.570337e-03
1.072069e-01 -2.604598e-03
1.072092e-01 7.452637e-04
1.072129e-01 3.557043e-03
1.072247e-01 1.605591e-03
1.072308e-01 1.185288e-03
1.072319e-01 4.610269e-04
1.072327e-01 3.207366e-03
1.072351e-01 6.216012e-04
1.072367e-01 -9.446980e-04
1.072415e-01 -9.999621e-04
1.072543e-01 1.390345e-03
1.072593e-01 4.289458e-03
1.072614e-01 3.013210e-03
1.072616e-01 3.676734e-03
1.072729e-01 -2.308762e-03
1.072733e-01 -1.942470e-03
1.072782e-01 -2.295672e-04
1.072967e-01 3.094286e-03
1.072982e-01 4.451297e-03
1.073077e-01 1.146713e-03
1.073125e-01 9.002526e-04
1.073143e-01 6.973589e-04
1.073229e-01 6.300673e-04
1.073265e-01 -4.904801e-03
1.073338e-01 3.007776e-03
1.073496e-01 6.331931e-04
1.073512e-01 1.947835e-03
1.073542e-01 6.008578e-03
1.073567e-01 6.462821e-05
1.073573e-01 -1.749537e-03
1.073585e-01 -4.318255e-04
1.073600e-01 1.069183e-04
1.073726e-01 3.903342e-03
1.073726e-01 3.903342e-03
1.073808e-01 -4.664935e-03
1.073868e-01 -6.731832e-05
1.073953e-01 -4.134875e-04
1.074031e-01 4.791832e-04
1.074072e-01 3.077066e-03
1.074093e-01 -2.282034e-03
1.074122e-01 -1.395330e-03
1.074202e-01 1.370137e-05
1.074246e-01 -1.965421e-03
1.074510e-01 -6.441794e-04
1.074590e-01 6.996883e-03
1.074664e-01 -1.317058e-03
1.074704e-01 3.301416e-05
1.074718e-01 -1.284752e-03
1.074861e-01 6.830836e-04
1.074947e-01 1.960241e-03
1.075039e-01 -3.646883e-03
1.075065e-01 4.128912e-03
1.075086e-01 -4.778741e-04
1.075103e-01 1.196828e-03
1.075128e-01 -8.027452e-04
1.075150e-01 3.926801e-04
1.075222e-01 6.073267e-04
1.075229e-01 -1.736832e-03
1.075235e-01 -4.017854e-04
1.075282e-01 -3.407898e-03
1.075305e-01 1.218098e-03
1.075551e-01 -4.359011e-03
1.075770e-01 -1.843925e-03
1.075827e-01 -4.230181e-04
1.075912e-01 -1.381913e-03
1.076003e-01 3.722719e-03
1.076037e-01 3.139942e-04
1.076096e-01 -4.858429e-04
1.076219e-01 9.816273e-04
1.076247e-01 -9.962205e-04
1.076272e-01 -5.780123e-04
1.076301e-01 -3.223248e-03
1.076399e-01 2.992085e-03
1.076463e-01 1.303858e-04
1.076551e-01 -1.713279e-04
1.076562e-01 -2.053595e-05
1.076584e-01 5.680904e-04
1.076600e-01 -8.380339e-04
1.076606e-01 4.254379e-04
1.076711e-01 -2.730979e-03
1.076733e-01 3.158648e-03
1.076754e-01 -1.170545e-03
1.076840e-01 -2.049053e-03
1.076903e-01 -5.329504e-04
1.076921e-01 2.703673e-03
1.076932e-01 5.591196e-06
1.076944e-01 -9.681078e-04
1.076995e-01 -3.682636e-05
1.077002e-01 3.123331e-03
1.077101e-01 -7.906030e-04
1.077122e-01 9.424047e-04
1.077142e-01 -1.762779e-03
1.077142e-01 -1.762779e-03
1.077178e-01 -2.487644e-03
1.077179e-01 -1.653309e-03
1.077279e-01 -2.678021e-04
1.077293e-01 9.933919e-04
1.077455e-01 -8.499436e-04
1.077484e-01 -9.892895e-04
1.077515e-01 1.111212e-03
1.077616e-01 -1.032584e-03
1.077635e-01 5.273728e-03
1.077689e-01 2.934182e-03
1.077822e-01 2.461405e-03
1.077842e-01 -1.933423e-03
1.077932e-01 -1.674624e-03
1.077960e-01 2.803923e-03
1.078013e-01 3.398095e-03
1.078029e-01 -1.523148e-03
1.078035e-01 1.660986e-03
1.078135e-01 -2.788449e-03
1.078179e-01 -6.229943e-03
1.078204e-01 7.723847e-04
1.078265e-01 -1.563134e-04
1.078286e-01 1.656968e-03
1.078558e-01 -6.873719e-04
1.078730e-01 -5.235877e-04
1.078732e-01 -2.670973e-04
1.078977e-01 1.286074e-04
1.079201e-01 4.031776e-04
1.079276e-01 4.759773e-04
1.079285e-01 -2.485889e-04
1.079346e-01 3.518463e-03
1.079442e-01 -8.325441e-04
1.079446e-01 -6.373382e-04
1.079518e-01 -7.804484e-04
1.079518e-01 -7.804484e-04
1.079545e-01 -3.995515e-03
1.079552e-01 1.963325e-04
1.079606e-01 7.844423e-03
1.079844e-01 9.644240e-05
1.079861e-01 1.406175e-04
1.080026e-01 8.966605e-04
1.080123e-01 -2.943381e-03
1.080125e-01 -1.916794e-04
1.080192e-01 8.359240e-04
1.080211e-01 1.530034e-04
1.080418e-01 -1.142459e-03
1.080419e-01 2.312314e-03
1.080575e-01 1.774776e-03
1.080582e-01 1.813190e-03
1.080648e-01 5.686477e-04
1.080724e-01 1.106427e-03
1.080730e-01 1.741000e-03
1.080922e-01 -7.158170e-04
1.081049e-01 2.202215e-03
1.081221e-01 -2.031985e-03
1.081379e-01 6.420190e-04
1.081379e-01 6.420190e-04
1.081395e-01 -2.767776e-04
1.081614e-01 -1.576306e-03
1.081618e-01 1.618336e-03
1.081941e-01 -3.260179e-03
1.082073e-01 1.540242e-03
1.082165e-01 5.721474e-04
1.082194e-01 -1.320689e-03
1.082195e-01 3.087560e-03
1.082229e-01 -6.158499e-04
1.082413e-01 1.301295e-04
1.082525e-01 2.971573e-03
1.082527e-01 -4.226110e-03
1.082533e-01 -3.684519e-03
1.082533e-01 -3.684519e-03
1.082638e-01 5.150612e-04
1.082688e-01 1.960753e-03
1.082823e-01 1.073231e-04
1.082831e-01 1.066888e-03
1.082890e-01 -5.834489e-04
1.082973e-01 -2.590021e-03
1.083006e-01 -5.206725e-04
1.083146e-01 4.396573e-04
1.083181e-01 8.725300e-05
1.083191e-01 -1.712344e-03
1.083219e-01 2.135052e-03
1.083309e-01 8.587963e-04
1.083372e-01 2.100185e-03
1.083377e-01 7.464217e-04
1.083441e-01 2.412784e-03
1.083462e-01 1.166453e-03
1.083485e-01 1.682073e-03
1.083547e-01 8.914217e-04
1.083627e-01 -1.335118e-03
1.083642e-01 -1.570502e-03
1.083655e-01 8.798946e-04
1.083686e-01 3.367648e-03
1.083798e-01 8.053993e-04
1.083857e-01 1.415948e-03
1.083983e-01 -9.571393e-05
1.084160e-01 5.952497e-04
1.084268e-01 5.562557e-03
1.084379e-01 2.957428e-03
1.084398e-01 1.747045e-03
1.084492e-01 5.456061e-03
1.084546e-01 3.665423e-03
1.084564e-01 1.665308e-03
1.084599e-01 -1.395606e-03
1.084645e-01 -1.025940e-03
1.084656e-01 8.547744e-04
1.084854e-01 2.994558e-03
1.085009e-01 3.886135e-04
1.085030e-01 -7.572727e-04
1.085063e-01 3.524787e-03
1.085142e-01 3.585617e-03
1.085245e-01 -2.155047e-04
1.085245e-01 5.933738e-04
1.085318e-01 2.471050e-03
1.085349e-01 1.075656e-02
1.085405e-01 7.383751e-03
1.085571e-01 7.189967e-04
1.085587e-01 -1.263175e-03
1.085606e-01 3.198295e-03
1.085606e-01 3.198295e-03
1.085616e-01 1.177293e-03
1.085659e-01 -2.752974e-04
1.085778e-01 -9.290660e-04
1.085902e-01 2.488879e-05
1.086050e-01 5.997161e-04
1.086057e-01 -3.780153e-05
1.086103e-01 -3.679361e-03
1.086112e-01 -1.167281e-03
1.086136e-01 2.400895e-03
1.086138e-01 -3.937383e-03
1.086272e-01 2.469378e-03
1.086272e-01 2.469378e-03
1.086367e-01 -2.163720e-03
1.086367e-01 -2.163720e-03
1.086482e-01 3.163577e-03
1.086518e-01 -1.353130e-03
1.086574e-01 4.485094e-04
1.086611e-01 -1.520787e-03
1.086611e-01 -1.520787e-03
1.086736e-01 1.366635e-03
1.086736e-01 1.366635e-03
1.086821e-01 -8.642711e-04
1.086907e-01 6.154020e-04
1.086973e-01 8.889515e-06
1.087031e-01 -2.265125e-03
1.087041e-01 -1.646901e-03
1.087187e-01 1.888157e-03
1.087260e-01 2.900697e-03
1.087276e-01 6.574764e-04
1.087297e-01 -1.774066e-04
1.087432e-01 6.151294e-03
1.087465e-01 1.714025e-03
1.087702e-01 2.487852e-03
1.087766e-01 -1.331691e-03
1.087839e-01 4.857801e-04
1.087861e-01 6.668170e-03
1.088036e-01 -1.204320e-03
1.088059e-01 -4.621403e-03
1.088120e-01 6.456082e-04
1.088160e-01 5.109996e-03
1.088237e-01 8.925404e-04
1.088242e-01 3.371594e-04
1.088470e-01 -4.055993e-03
1.088472e-01 5.540880e-03
1.088518e-01 1.546100e-03
1.088554e-01 -3.655830e-03
1.088570e-01 3.081164e-03
1.088622e-01 -1.625012e-03
1.088623e-01 -9.344530e-04
1.088785e-01 8.440207e-04
1.088817e-01 3.225867e-03
1.088823e-01 -1.578124e-03
1.088860e-01 4.893629e-03
1.089077e-01 2.698333e-03
1.089136e-01 -1.829642e-04
1.089309e-01 3.145382e-03
1.089322e-01 -3.170920e-03
1.089369e-01 -1.218885e-03
1.089414e-01 -1.523670e-03
1.089423e-01 -8.903375e-04
1.089482e-01 -1.241503e-04
1.089570e-01 -8.226555e-04
1.089757e-01 -1.154615e-03
1.089761e-01 2.220947e-03
1.089855e-01 -1.272052e-03
1.089915e-01 -1.774615e-03
1.090020e-01 -2.043304e-03
1.090057e-01 3.676057e-03
1.090151e-01 2.714855e-03
1.090160e-01 -8.737557e-04
1.090227e-01 2.455256e-03
1.090351e-01 -1.224982e-04
1.090369e-01 -6.977482e-04
1.090539e-01 5.142136e-03
1.090562e-01 -2.045077e-04
1.090614e-01 -9.537606e-04
1.090649e-01 8.614320e-04
1.090685e-01 -2.024675e-03
1.090723e-01 4.822523e-05
1.090892e-01 -1.203613e-03
1.091123e-01 -2.169992e-03
1.091226e-01 -1.082296e-03
1.091248e-01 5.416671e-03
1.091282e-01 9.395594e-04
1.091453e-01 -2.290910e-03
1.091459e-01 5.288216e-03
1.091542e-01 5.213547e-04
1.091586e-01 -1.185243e-03
1.091601e-01 -1.363664e-03
1.091696e-01 7.565811e-04
1.091726e-01 -7.412759e-04
1.091744e-01 -2.538699e-03
1.091759e-01 -9.075723e-04
1.091769e-01 8.797880e-04
1.091798e-01 1.779126e-03
1.091800e-01 7.651878e-04
1.091887e-01 1.409227e-03
1.092015e-01 -5.964627e-05
1.092055e-01 4.412536e-04
1.092117e-01 1.357170e-03
1.092220e-01 8.933652e-04
1.092242e-01 -2.410447e-03
1.092285e-01 1.197308e-03
1.092323e-01 1.374143e-03
1.092352e-01 3.387933e-03
1.092383e-01 -1.194877e-03
1.092443e-01 6.606598e-04
1.092460e-01 1.994349e-03
1.092475e-01 1.569856e-03
1.092603e-01 1.543341e-03
1.092653e-01 8.374166e-04
1.092691e-01 1.933375e-03
1.092701e-01 -8.274547e-04
1.092726e-01 2.362112e-03
1.092750e-01 -1.675600e-03
1.092750e-01 -1.675600e-03
1.092752e-01 -2.048661e-04
1.092845e-01 -4.291151e-03
1.092852e-01 -2.143413e-03
1.092852e-01 -2.143413e-03
1.092885e-01 3.827810e-04
1.093049e-01 9.039748e-04
1.093062e-01 -1.747291e-03
1.093101e-01 4.929800e-03
1.093253e-01 1.129129e-03
1.093334e-01 -2.589496e-03
1.093407e-01 7.154492e-03
1.093500e-01 2.261170e-03
1.093562e-01 8.526446e-03
1.093642e-01 3.475575e-03
1.093782e-01 -2.449677e-03
1.093875e-01 5.749841e-05
1.094013e-01 -2.023071e-03
1.094077e-01 6.911925e-03
1.094097e-01 4.658840e-04
1.094209e-01 -9.605876e-04
1.094221e-01 1.233530e-03
1.094249e-01 -1.111246e-03
1.094279e-01 3.172566e-04
1.094463e-01 -2.959660e-04
1.094506e-01 2.097053e-03
1.094589e-01 4.498002e-04
1.094610e-01 1.647677e-02
1.094623e-01 5.254900e-04
1.094640e-01 -2.546073e-03
1.094687e-01 1.433006e-03
1.094706e-01 -1.890920e-04
1.094916e-01 -2.794447e-03
1.094926e-01 -1.019755e-03
1.095015e-01 5.167821e-04
1.095034e-01 2.241904e-03
1.095062e-01 -1.576736e-03
1.095202e-01 5.315852e-04
1.095221e-01 -1.191925e-03
1.095221e-01 -1.191925e-03
1.095402e-01 -1.126586e-03
1.095457e-01 -1.985369e-05
1.095476e-01 -1.744675e-03
1.095500e-01 -1.299770e-03
1.095524e-01 -4.152931e-03
1.095533e-01 8.083152e-03
1.095562e-01 1.298045e-03
1.095566e-01 9.168600e-04
1.095733e-01 9.921231e-05
1.095780e-01 -2.687792e-03
1.095825e-01 4.872983e-04
1.095896e-01 9.579392e-04
1.096103e-01 9.567254e-04
1.096107e-01 7.382817e-05
1.096115e-01 2.315035e-03
1.096252e-01 1.170765e-03
1.096253e-01 1.416165e-03
1.096281e-01 -4.341493e-03
1.096303e-01 -1.616809e-03
1.096322e-01 5.520742e-03
1.096351e-01 2.452302e-03
1.096511e-01 2.944138e-03
1.096527e-01 -1.633308e-03
1.096555e-01 -1.580294e-03
1.096628e-01 -2.714946e-03
1.096754e-01 2.698023e-03
1.096760e-01 -1.288589e-03
1.096846e-01 -5.004936e-03
1.096849e-01 -1.854214e-03
1.096910e-01 -8.572594e-04
1.096957e-01 -2.099939e-04
1.097061e-01 -1.061360e-03
1.097070e-01 -1.436278e-03
1.097280e-01 1.691002e-03
1.097338e-01 3.483381e-04
1.097390e-01 1.611200e-03
1.097390e-01 4.057934e-03
1.097398e-01 1.438022e-03
1.097424e-01 -2.055362e-03
1.097467e-01 3.297697e-03
1.097549e-01 -2.748176e-03
1.097631e-01 1.671804e-03
1.097680e-01 -1.398369e-03
1.097707e-01 1.360706e-03
1.097721e-01 9.629827e-04
1.097788e-01 4.040500e-03
1.097830e-01 6.216305e-03
1.098016e-01 3.561112e-03
1.098035e-01 2.092425e-03
1.098088e-01 1.311912e-03
1.098143e-01 9.397102e-03
1.098294e-01 1.104915e-03
1.098297e-01 2.761539e-04
1.098305e-01 4.745630e-04
1.098337e-01 -8.309535e-04
1.098403e-01 1.395023e-03
1.098436e-01 1.513588e-03
1.098591e-01 3.141857e-04
1.098717e-01 4.070659e-03
1.098749e-01 -9.709623e-05
1.098839e-01 2.392789e-05
1.098865e-01 7.931614e-03
1.098922e-01 -1.714716e-03
1.098926e-01 -1.449933e-03
1.099014e-01 -3.823973e-04
1.099108e-01 -1.319979e-03
1.099174e-01 -9.034511e-04
1.099400e-01 1.279679e-03
1.099400e-01 1.279679e-03
1.099464e-01 -2.565467e-04
1.099475e-01 -1.081147e-03
1.099522e-01 -1.729708e-03
1.099522e-01 -1.729708e-03
1.099576e-01 -1.151163e-03
1.099592e-01 2.163155e-03
1.099702e-01 5.739040e-04
1.099750e-01 1.299210e-04
1.099794e-01 -8.101271e-04
1.099917e-01 1.575883e-03
1.099918e-01 -5.484795e-04
1.099947e-01 4.818873e-04
1.099980e-01 -1.687343e-03
1.099996e-01 -1.520904e-03
1.100126e-01 1.227118e-03
1.100129e-01 -7.400517e-04
1.100181e-01 2.564764e-03
1.100190e-01 1.203883e-03
1.100213e-01 1.574772e-03
1.100234e-01 3.463357e-04
1.100235e-01 -6.905280e-04
1.100276e-01 7.642780e-04
1.100403e-01 -4.576167e-04
1.100406e-01 2.784236e-03
1.100423e-01 1.490816e-03
1.100489e-01 -1.382065e-03
1.100513e-01 -3.227729e-04
1.100593e-01 3.050405e-04
1.100654e-01 -1.300341e-04
1.100915e-01 -1.002977e-03
1.100932e-01 -6.261613e-04
1.100974e-01 1.267662e-03
1.101018e-01 -1.097091e-03
1.101100e-01 6.068806e-04
1.101110e-01 3.760169e-04
1.101111e-01 1.556879e-03
1.101146e-01 -2.753733e-04
1.101389e-01 -7.930338e-04
1.101409e-01 -4.818553e-05
1.101610e-01 1.483909e-04
1.101632e-01 -1.721746e-03
1.101646e-01 9.311031e-04
1.101665e-01 2.159717e-03
1.102009e-01 -1.359302e-04
1.102026e-01 -1.259070e-04
1.102041e-01 1.111003e-03
1.102148e-01 1.166406e-03
1.102213e-01 1.619716e-03
1.102238e-01 3.673278e-03
1.102273e-01 -1.949266e-03
1.102278e-01 1.857171e-03
1.102399e-01 1.901748e-03
1.102434e-01 3.180083e-04
1.102440e-01 1.298821e-03
1.102463e-01 2.031424e-04
1.102485e-01 7.929723e-05
1.102499e-01 1.347031e-03
1.102543e-01 5.301997e-04
1.102697e-01 -2.219733e-03
1.102752e-01 8.532663e-04
1.102835e-01 1.192823e-03
1.102843e-01 1.233881e-03
1.102868e-01 -1.371390e-04
1.103038e-01 3.503309e-04
1.103185e-01 -6.248197e-04
1.103192e-01 2.004872e-04
1.103317e-01 -9.435309e-04
1.103338e-01 2.578802e-04
1.103410e-01 6.198422e-03
1.103436e-01 -6.256123e-05
1.103454e-01 2.787159e-03
1.103460e-01 -2.312604e-03
1.103466e-01 4.566380e-04
1.103556e-01 3.310316e-04
1.103636e-01 -2.723992e-03
1.103683e-01 3.744004e-03
1.103691e-01 -3.087977e-03
1.103694e-01 -8.361134e-04
1.103720e-01 9.608231e-04
1.103818e-01 4.065177e-04
1.103824e-01 1.057769e-03
1.104006e-01 1.821447e-04
1.104026e-01 5.462131e-03
1.104111e-01 -1.460483e-03
1.104230e-01 -2.204226e-03
1.104246e-01 4.713834e-03
1.104282e-01 -2.874403e-03
1.104364e-01 2.172775e-03
1.104386e-01 4.190299e-03
1.104542e-01 1.455260e-03
1.104623e-01 -1.158372e-03
1.104635e-01 -1.447234e-03
1.104731e-01 -1.514977e-03
1.104755e-01 -1.222488e-03
1.104774e-01 3.001605e-03
1.104799e-01 1.737197e-03
1.104847e-01 -1.775242e-04
1.104948e-01 1.523691e-03
1.104978e-01 1.097107e-03
1.105032e-01 2.784618e-03
1.105117e-01 -3.080884e-03
1.105119e-01 4.367161e-03
1.105170e-01 -8.856861e-04
1.105210e-01 -1.762401e-03
1.105268e-01 1.735040e-03
1.105317e-01 3.419009e-03
1.105476e-01 -2.616559e-03
1.105598e-01 -2.497510e-03
1.105832e-01 9.173239e-04
1.105837e-01 -5.555134e-04
1.105838e-01 -2.872503e-03
1.105871e-01 3.397882e-04
1.105894e-01 -2.104967e-03
1.105958e-01 -9.614263e-04
1.106027e-01 4.773438e-03
1.106114e-01 1.163641e-03
1.106153e-01 2.338095e-04
1.106181e-01 3.727121e-05
1.106349e-01 -4.162758e-04
1.106353e-01 2.441872e-03
1.106496e-01 1.015918e-04
1.106613e-01 8.401820e-04
1.106620e-01 -3.016683e-03
1.106668e-01 8.888980e-04
1.106723e-01 8.119225e-04
1.106731e-01 1.425681e-03
1.106758e-01 -2.547558e-03
1.106789e-01 -8.752596e-04
1.106898e-01 -5.775145e-04
1.106959e-01 1.356837e-03
1.106967e-01 5.455423e-03
1.106997e-01 9.134396e-04
1.107003e-01 2.502573e-04
1.107034e-01 8.759043e-04
1.107067e-01 3.166800e-04
1.107108e-01 1.140356e-03
1.107349e-01 -1.680091e-03
1.107383e-01 -2.560981e-03
1.107421e-01 -1.000027e-03
1.107443e-01 -7.337928e-05
1.107446e-01 2.835632e-04
1.107458e-01 2.130690e-03
1.107479e-01 2.446744e-06
1.107480e-01 -1.262873e-03
1.107554e-01 9.900300e-04
1.107600e-01 -2.188244e-03
1.107643e-01 1.634347e-03
1.107687e-01 2.106212e-04
1.107696e-01 7.981541e-04
1.107802e-01 2.526966e-03
1.107807e-01 2.205744e-04
1.107832e-01 -2.333009e-03
1.107876e-01 -6.362728e-05
1.107899e-01 1.374780e-06
1.107913e-01 3.144295e-03
1.107917e-01 -3.335096e-04
1.107919e-01 4.815544e-03
1.107983e-01 -1.488325e-03
1.108013e-01 -1.732652e-03
1.108120e-01 -4.578857e-03
1.108122e-01 1.211741e-03
1.108156e-01 -1.778366e-03
1.108156e-01 -1.089745e-03
1.108213e-01 -3.212036e-03
1.108271e-01 -7.749933e-04
1.108275e-01 -8.447942e-04
1.108293e-01 -1.739982e-05
1.108373e-01 6.806588e-03
1.108377e-01 -2.156869e-04
1.108395e-01 5.999327e-03
1.108434e-01 3.247922e-03
1.108434e-01 3.247922e-03
1.108444e-01 -7.103755e-04
1.108463e-01 -1.280306e-03
1.108499e-01 3.242093e-04
1.108643e-01 2.374552e-03
1.108660e-01 5.177747e-03
1.108726e-01 1.250136e-03
1.108763e-01 2.151276e-03
1.108828e-01 -5.393388e-04
1.108839e-01 2.490817e-03
1.108914e-01 1.797786e-03
1.108999e-01 -2.914769e-03
1.109071e-01 -1.091834e-03
1.109094e-01 9.625881e-04
1.109136e-01 2.413727e-03
1.109141e-01 -1.637954e-03
1.109156e-01 1.699819e-03
1.109199e-01 -1.501714e-03
1.109270e-01 -3.653747e-05
1.109315e-01 3.861782e-03
1.109378e-01 2.181564e-03
1.109444e-01 5.840964e-04
1.109455e-01 -1.570051e-03
1.109483e-01 7.294886e-04
1.109502e-01 -3.664340e-03
1.109541e-01 2.193242e-03
1.109553e-01 -3.147655e-03
1.109559e-01 -1.161990e-04
1.109684e-01 1.650106e-03
1.109776e-01 -1.356638e-03
1.109776e-01 -1.356638e-03
1.109939e-01 1.934650e-03
1.110198e-01 2.284078e-03
1.110373e-01 2.274935e-03
1.110379e-01 4.168777e-03
1.110384e-01 -1.973322e-03
1.110410e-01 4.743280e-03
1.110441e-01 -9.863598e-05
1.110497e-01 -1.289554e-03
1.110497e-01 -1.289554e-03
1.110572e-01 1.455113e-03
1.110589e-01 -2.562658e-03
1.110630e-01 -1.848883e-03
1.110710e-01 8.779340e-04
1.110850e-01 -5.239689e-04
1.110860e-01 8.097082e-04
1.110977e-01 4.428397e-03
1.111071e-01 -1.064849e-03
1.111183e-01 1.059636e-03
1.111294e-01 1.986535e-03
1.111304e-01 1.721505e-03
1.111390e-01 -1.163532e-03
1.111547e-01 4.741577e-04
1.111566e-01 -3.634009e-03
1.111566e-01 -3.634009e-03
1.111733e-01 -3.857972e-03
1.111755e-01 2.152351e-04
1.111758e-01 -6.991668e-04
1.111805e-01 1.916375e-03
1.111840e-01 -1.893188e-03
1.111876e-01 6.641137e-04
1.111964e-01 -1.497980e-03
1.112106e-01 1.242569e-03
1.112110e-01 -3.176187e-03
1.112151e-01 -1.394826e-04
1.112258e-01 3.492229e-03
1.112269e-01 3.052411e-03
1.112479e-01 1.239441e-03
1.112561e-01 -2.316928e-03
1.112809e-01 8.480613e-04
1.112857e-01 -1.470311e-03
1.112884e-01 7.180944e-04
1.112972e-01 1.271682e-03
1.112972e-01 -1.126981e-03
1.113169e-01 3.449428e-03
1.113178e-01 -6.971210e-04
1.113178e-01 -6.971210e-04
1.113201e-01 -3.432488e-03
1.113267e-01 2.624896e-04
1.113272e-01 1.399862e-03
1.113273e-01 9.714176e-04
1.113273e-01 -4.007756e-04
1.113291e-01 -9.393515e-04
1.113408e-01 1.596119e-03
1.113421e-01 5.448199e-03
1.113606e-01 1.489587e-03
1.113772e-01 -2.808139e-03
1.113782e-01 -6.282719e-04
1.113833e-01 3.451646e-03
1.113868e-01 3.296818e-04
1.113920e-01 -8.815148e-04
1.113936e-01 4.053949e-03
1.113945e-01 -6.249323e-04
1.113966e-01 7.048465e-03
1.113969e-01 -4.573505e-04
1.114014e-01 4.272724e-04
1.114074e-01 3.533334e-03
1.114111e-01 -2.472528e-03
1.114174e-01 1.489597e-03
1.114189e-01 3.174927e-04
1.114248e-01 2.978565e-03
1.114265e-01 2.065852e-04
1.114385e-01 5.271093e-04
1.114395e-01 1.418227e-04
1.114479e-01 1.471825e-03
1.114636e-01 -1.717077e-03
1.114794e-01 -7.831591e-04
1.114825e-01 2.335436e-03
1.114830e-01 -2.021473e-03
1.114858e-01 7.762750e-05
1.114891e-01 -3.515734e-04
1.115114e-01 -6.421485e-04
1.115138e-01 1.047083e-03
1.115214e-01 1.289715e-03
1.115261e-01 1.760902e-04
1.115287e-01 1.346373e-03
1.115354e-01 -6.231274e-04
1.115385e-01 1.723371e-03
1.115415e-01 4.546706e-04
1.115477e-01 -2.845056e-03
1.115590e-01 -4.437922e-03
1.115596e-01 -2.347978e-03
1.115634e-01 1.698462e-03
1.115776e-01 4.816441e-03
1.115814e-01 2.404981e-03
1.115894e-01 7.786886e-03
1.115906e-01 1.706732e-03
1.116095e-01 3.402143e-03
1.116117e-01 2.781298e-03
1.116124e-01 2.664290e-04
1.116232e-01 -6.982963e-04
1.116237e-01 3.474812e-03
1.116480e-01 -6.760563e-04
1.116499e-01 4.674384e-03
1.116564e-01 1.995655e-03
1.116565e-01 1.846413e-03
1.116574e-01 -1.908699e-03
1.116646e-01 -3.691901e-03
1.116670e-01 -1.555183e-03
1.116679e-01 -8.585451e-06
1.116679e-01 -8.585451e-06
1.116688e-01 -2.778011e-03
1.116693e-01 1.157954e-03
1.116818e-01 -4.499905e-03
1.116843e-01 -2.403533e-03
1.116843e-01 -2.403533e-03
1.116901e-01 2.055218e-03
1.117014e-01 -1.512162e-03
1.117086e-01 -1.329750e-03
1.117087e-01 -9.069938e-07
1.117097e-01 5.125969e-03
1.117248e-01 -2.430653e-03
1.117301e-01 1.003481e-03
1.117314e-01 -2.562807e-04
1.117367e-01 -1.731237e-03
1.117483e-01 -5.480546e-03
1.117559e-01 5.674222e-05
1.117586e-01 1.245116e-03
1.117814e-01 -3.472643e-03
1.117823e-01 4.294134e-05
1.117827e-01 -5.166898e-04
1.117885e-01 -9.649574e-04
1.118010e-01 -7.949025e-04
1.118031e-01 -9.055770e-04
1.118077e-01 1.017821e-03
1.118087e-01 1.976667e-03
1.118167e-01 3.723275e-03
1.118167e-01 3.723275e-03
1.118252e-01 -8.357336e-04
1.118338e-01 5.141174e-03
1.118338e-01 5.141174e-03
1.118344e-01 -1.463161e-03
1.118362e-01 -1.310589e-03
1.118370e-01 2.919869e-03
1.118546e-01 -1.974109e-04
1.118627e-01 3.250167e-03
1.118758e-01 1.078971e-03
1.118795e-01 4.738870e-03
1.118847e-01 7.015272e-03
1.119048e-01 5.011653e-04
1.119068e-01 2.634327e-03
1.119186e-01 -1.563194e-03
1.119210e-01 2.418225e-03
1.119222e-01 1.279696e-03
1.119333e-01 2.560193e-04
1.119393e-01 -1.309628e-03
1.119407e-01 1.297139e-03
1.119461e-01 -2.731670e-04
1.119517e-01 -1.606099e-03
1.119530e-01 -2.746130e-04
1.119591e-01 9.817933e-04
1.119693e-01 1.514811e-03
1.119713e-01 6.864138e-03
1.119827e-01 5.582859e-03
1.119953e-01 2.664310e-03
1.120136e-01 4.293258e-04
1.120219e-01 -2.398557e-03
1.120359e-01 6.445877e-04
1.120360e-01 -8.620352e-06
1.120541e-01 1.240940e-03
1.120609e-01 5.929168e-04
1.120679e-01 -1.980161e-03
1.120726e-01 8.807799e-04
1.120741e-01 -7.312847e-04
1.120856e-01 -8.627922e-05
1.120872e-01 9.613489e-04
1.120872e-01 9.613489e-04
1.120900e-01 1.050156e-03
1.121026e-01 1.303605e-03
1.121050e-01 1.583945e-03
1.121119e-01 -2.071865e-03
1.121181e-01 4.089981e-03
1.121286e-01 5.555319e-04
1.121397e-01 4.087060e-03
1.121478e-01 5.431899e-03
1.121538e-01 8.585981e-05
1.121570e-01 3.755958e-04
1.121632e-01 5.544332e-04
1.121727e-01 2.132305e-03
1.121740e-01 2.482919e-04
1.121781e-01 3.600558e-04
1.121857e-01 -2.416487e-04
1.121912e-01 -1.228346e-03
1.121930e-01 -6.088959e-04
1.121931e-01 1.279610e-03
1.122020e-01 1.715502e-03
1.122047e-01 -2.494118e-03
1.122054e-01 -2.694596e-03
1.122071e-01 2.040292e-03
1.122113e-01 3.355834e-03
1.122188e-01 5.029902e-04
1.122188e-01 1.727715e-03
1.122285e-01 1.319244e-03
1.122285e-01 1.319244e-03
1.122293e-01 4.009543e-03
1.122341e-01 2.644691e-04
1.122461e-01 2.842496e-03
1.122479e-01 -8.635513e-04
1.122490e-01 2.305518e-03
1.122516e-01 -3.341531e-03
1.122523e-01 -2.166982e-03
1.122548e-01 -1.391686e-03
1.122558e-01 9.507171e-04
1.122629e-01 -2.335887e-03
1.122681e-01 -2.038682e-03
1.122691e-01 1.739381e-04
1.122711e-01 2.183303e-03
1.122752e-01 -2.314429e-03
1.122792e-01 1.746182e-04
1.122893e-01 3.573609e-03
1.122903e-01 -9.819072e-04
1.122938e-01 -6.849008e-04
1.122979e-01 5.774578e-04
1.123110e-01 -4.234460e-04
1.123265e-01 1.089921e-03
1.123280e-01 -1.367654e-03
1.123374e-01 -2.867613e-03
1.123374e-01 -2.867613e-03
1.123396e-01 3.417167e-04
1.123524e-01 5.362018e-04
1.123626e-01 -5.421460e-04
1.123644e-01 -3.120415e-04
1.123706e-01 -9.376816e-04
1.123761e-01 5.041283e-04
1.123801e-01 -1.806599e-03
1.123860e-01 -1.859380e-03
1.123894e-01 1.971185e-03
1.123960e-01 1.381003e-04
1.124026e-01 1.790399e-03
1.124066e-01 1.083434e-03
1.124085e-01 -3.014787e-03
1.124127e-01 2.702832e-03
1.124163e-01 1.928971e-04
1.124202e-01 2.008427e-03
1.124211e-01 3.884655e-04
1.124265e-01 -1.553416e-03
1.124289e-01 3.150042e-03
1.124521e-01 9.658941e-04
1.124605e-01 -4.099753e-04
1.124649e-01 3.803346e-05
1.124714e-01 -6.723495e-04
1.124852e-01 2.123480e-04
1.124880e-01 4.790552e-04
1.125125e-01 -6.634064e-04
1.125170e-01 -1.389259e-03
1.125179e-01 1.270981e-03
1.125213e-01 1.921715e-03
1.125457e-01 6.594795e-04
1.125528e-01 -1.373908e-03
1.125623e-01 -1.169915e-03
1.125645e-01 -2.286305e-03
1.125696e-01 1.460339e-03
1.125770e-01 -6.103629e-04
1.125821e-01 3.105491e-03
1.125884e-01 6.476974e-04
1.125884e-01 6.476974e-04
1.125927e-01 6.608527e-04
1.125943e-01 -1.041981e-03
1.125974e-01 -1.887691e-03
1.125998e-01 1.608182e-03
1.126023e-01 3.249722e-05
1.126170e-01 -1.531329e-03
1.126266e-01 -2.370751e-03
1.126395e-01 -1.641683e-03
1.126426e-01 1.285131e-03
1.126450e-01 -2.279492e-04
1.126623e-01 -1.904542e-03
1.126634e-01 5.772462e-04
1.126663e-01 8.688117e-04
1.126665e-01 4.879104e-03
1.126834e-01 -2.933504e-03
1.126839e-01 7.856339e-04
1.126877e-01 1.720925e-03
1.126882e-01 -4.149208e-03
1.127010e-01 -9.775529e-04
1.127017e-01 -1.067002e-03
1.127054e-01 9.587527e-04
1.127059e-01 2.670582e-03
1.127089e-01 1.813127e-03
1.127135e-01 -6.031131e-04
1.127150e-01 1.858257e-03
1.127203e-01 4.048582e-04
1.127283e-01 4.337957e-03
1.127406e-01 -1.349735e-03
1.127412e-01 -1.981839e-03
1.127418e-01 1.988808e-03
1.127458e-01 -3.132424e-03
1.127488e-01 -2.864442e-03
1.127745e-01 -3.104215e-05
1.127776e-01 -9.301384e-04
1.127831e-01 1.217033e-03
1.127832e-01 -1.379820e-03
1.127848e-01 7.740817e-04
1.127916e-01 -9.825258e-04
1.128233e-01 -1.196840e-03
1.128387e-01 5.635904e-04
1.128509e-01 -3.287648e-03
1.128596e-01 -4.494132e-04
1.128646e-01 9.655624e-04
1.128731e-01 -4.076845e-04
1.128805e-01 1.247910e-03
1.128852e-01 1.376936e-04
1.128939e-01 2.305817e-03
1.128946e-01 2.839639e-04
1.128962e-01 -2.183677e-03
1.128967e-01 -1.850948e-03
1.129107e-01 1.618610e-03
1.129127e-01 3.360449e-03
1.129175e-01 -1.450159e-03
1.129202e-01 7.182447e-04
1.129254e-01 3.765580e-03
1.129264e-01 2.702171e-03
1.129294e-01 4.626380e-03
1.129407e-01 4.130400e-04
1.129419e-01 1.740746e-04
1.129491e-01 -6.732627e-04
1.129491e-01 -6.732627e-04
1.129656e-01 -1.026255e-03
1.129674e-01 5.156876e-04
1.129675e-01 2.577337e-03
1.129726e-01 1.204285e-03
1.129733e-01 -1.472086e-03
1.129761e-01 -1.417126e-03
1.129954e-01 1.465980e-03
1.130058e-01 -5.296014e-03
1.130100e-01 3.966422e-03
1.130176e-01 2.240075e-03
1.130595e-01 -7.249903e-04
1.130654e-01 2.669389e-03
1.130696e-01 -4.757368e-04
1.130781e-01 -2.774308e-03
1.130923e-01 1.767964e-03
1.131203e-01 1.394892e-03
1.131373e-01 2.727741e-03
1.131397e-01 2.301799e-03
1.131399e-01 2.757765e-03
1.131439e-01 -9.650921e-04
1.131476e-01 -8.245548e-04
1.131486e-01 -1.116763e-03
1.131512e-01 -1.892263e-03
1.131537e-01 -2.694692e-03
1.131583e-01 -3.275485e-03
1.131604e-01 7.740484e-04
1.131711e-01 -3.712505e-03
1.131718e-01 -2.891566e-03
1.131824e-01 1.147914e-03
1.131930e-01 6.217870e-03
1.131985e-01 6.733525e-03
1.131995e-01 -6.881257e-04
1.132175e-01 -7.009614e-04
1.132185e-01 -1.342142e-03
1.132197e-01 -9.310329e-04
1.132217e-01 -1.247816e-03
1.132217e-01 -1.247816e-03
1.132249e-01 9.970314e-04
1.132263e-01 -3.604607e-03
1.132311e-01 3.918727e-03
1.132429e-01 -1.016048e-03
1.132463e-01 -2.220277e-03
1.132511e-01 2.276515e-04
1.132584e-01 -1.520959e-03
1.132584e-01 6.128959e-04
1.132632e-01 -2.938060e-03
1.132639e-01 2.626157e-03
1.132654e-01 -1.911784e-03
1.132737e-01 1.298568e-03
1.132755e-01 1.995404e-03
1.132789e-01 1.477306e-03
1.132964e-01 3.536133e-03
1.132965e-01 -2.411488e-03
1.133016e-01 -1.581278e-04
1.133025e-01 6.070474e-03
1.133027e-01 7.088013e-04
1.133072e-01 1.820476e-03
1.133098e-01 -1.715848e-03
1.133098e-01 -9.858067e-04
1.133108e-01 1.389540e-03
1.133128e-01 1.535585e-03
1.133131e-01 3.391376e-03
1.133213e-01 -4.526973e-05
1.133298e-01 -1.268442e-03
1.133303e-01 -1.315810e-03
1.133309e-01 -1.764103e-03
1.133337e-01 2.773138e-03
1.133390e-01 5.030743e-04
1.133391e-01 5.192957e-03
1.133483e-01 1.169257e-03
1.133568e-01 3.711130e-03
1.133861e-01 4.029746e-03
1.134057e-01 8.231211e-04
1.134057e-01 8.231211e-04
1.134103e-01 6.283919e-04
1.134109e-01 -2.425946e-04
1.134118e-01 1.456385e-03
1.134207e-01 9.466369e-04
1.134289e-01 1.956305e-03
1.134551e-01 6.087976e-03
1.134691e-01 9.223113e-04
1.134756e-01 3.112474e-03
1.134763e-01 -6.325937e-04
1.134772e-01 -4.650890e-03
1.134785e-01 2.452932e-03
1.134836e-01 7.890872e-04
1.134868e-01 -3.213954e-03
1.134934e-01 1.464220e-04
1.135127e-01 2.739119e-05
1.135151e-01 1.647728e-03
1.135151e-01 1.647728e-03
1.135207e-01 -1.522209e-03
1.135209e-01 5.124024e-03
1.135279e-01 6.996124e-04
1.135305e-01 6.227000e-04
1.135366e-01 5.069493e-03
1.135446e-01 1.309088e-03
1.135465e-01 8.385881e-04
1.135472e-01 -4.140036e-05
1.135541e-01 8.385689e-04
1.135563e-01 -8.529201e-04
1.135572e-01 1.461900e-03
1.135579e-01 1.581911e-04
1.135585e-01 7.511506e-04
1.135797e-01 -3.674871e-03
1.135866e-01 -1.276247e-03
1.135878e-01 -2.506734e-04
1.135903e-01 4.486529e-03
1.136232e-01 3.371207e-03
1.136365e-01 -1.929909e-03
1.136374e-01 -5.001859e-04
1.136374e-01 -5.001859e-04
1.136390e-01 -2.702131e-03
1.136416e-01 -5.466246e-04
1.136505e-01 8.396048e-04
1.136554e-01 -3.433646e-03
1.136598e-01 1.964390e-03
1.136599e-01 -2.132454e-03
1.136876e-01 -9.748222e-05
1.136888e-01 2.529732e-03
1.136892e-01 2.061364e-03
1.137022e-01 2.728789e-04
1.137027e-01 -5.604845e-04
1.137144e-01 -2.298908e-03
1.137222e-01 -1.200052e-03
1.137406e-01 -2.584492e-04
1.137489e-01 1.127887e-03
1.137553e-01 1.140124e-03
1.137561e-01 1.375334e-03
1.137651e-01 8.281775e-04
1.137807e-01 3.593067e-03
1.137844e-01 -1.045392e-03
1.137911e-01 1.356527e-03
1.137984e-01 5.011209e-04
1.137985e-01 -8.894173e-04
1.138072e-01 3.717142e-03
1.138091e-01 5.737686e-04
1.138115e-01 -2.498761e-04
1.138127e-01 9.174335e-04
1.138213e-01 -2.362247e-04
1.138218e-01 1.813225e-03
1.138228e-01 2.902135e-04
1.138260e-01 3.163018e-04
1.138610e-01 5.338350e-03
1.138762e-01 -2.603819e-03
1.138811e-01 -5.103707e-04
1.138844e-01 -8.046725e-04
1.138844e-01 -8.046725e-04
1.138910e-01 -1.253602e-03
1.139016e-01 -3.665147e-03
1.139111e-01 -8.817881e-04
1.139122e-01 5.523347e-04
1.139141e-01 -1.987245e-04
1.139155e-01 -2.106496e-03
1.139184e-01 1.426693e-03
1.139380e-01 -1.097186e-03
1.139389e-01 8.084673e-04
1.139404e-01 1.157468e-03
1.139489e-01 2.264330e-04
1.139536e-01 -1.097317e-03
1.139677e-01 2.368490e-03
1.139772e-01 1.108906e-03
1.139800e-01 -3.520549e-03
1.139930e-01 -1.012120e-04
1.140028e-01 2.021864e-03
1.140099e-01 3.726590e-03
1.140167e-01 2.030338e-03
1.140182e-01 7.132779e-03
1.140251e-01 5.840609e-05
1.140263e-01 -1.612962e-03
1.140276e-01 2.232683e-04
1.140300e-01 1.168637e-03
1.140311e-01 8.000099e-04
1.140319e-01 -9.959583e-04
1.140368e-01 2.806603e-03
1.140482e-01 1.359228e-05
1.140506e-01 -2.467278e-03
1.140678e-01 4.315542e-03
1.140908e-01 3.115275e-04
1.140924e-01 1.152415e-03
1.140947e-01 4.758918e-04
1.140983e-01 -1.819056e-04
1.140989e-01 -2.531650e-03
1.141225e-01 6.247601e-03
1.141247e-01 6.095046e-04
1.141250e-01 -1.888182e-03
1.141283e-01 -2.199902e-03
1.141324e-01 1.914129e-03
1.141353e-01 -1.796383e-03
1.141451e-01 1.401251e-04
1.141525e-01 7.234856e-03
1.141543e-01 1.159860e-03
1.141552e-01 1.070105e-03
1.141633e-01 2.220846e-03
1.141653e-01 9.869247e-03
1.141745e-01 7.327654e-04
1.141753e-01 -7.767994e-04
1.141780e-01 2.592001e-03
1.141795e-01 3.637254e-04
1.141868e-01 5.976622e-04
1.141915e-01 -3.772428e-03
1.142066e-01 -4.668679e-03
1.142117e-01 5.403999e-03
1.142231e-01 -1.410330e-03
1.142241e-01 -3.391378e-04
1.142309e-01 1.628258e-03
1.142441e-01 1.518579e-03
1.142510e-01 -6.860111e-04
1.142544e-01 2.378006e-03
1.142648e-01 -1.959744e-03
1.142785e-01 9.295897e-04
1.142870e-01 3.008097e-04
1.142947e-01 -2.720354e-03
1.143196e-01 2.593180e-03
1.143196e-01 2.593180e-03
1.143204e-01 1.414780e-03
1.143255e-01 -1.370950e-03
1.143397e-01 -1.706799e-03
1.143437e-01 3.993343e-03
1.143476e-01 1.650075e-03
1.143618e-01 2.942666e-04
1.143659e-01 7.727938e-04
1.143801e-01 -8.587046e-04
1.143815e-01 -8.501936e-04
1.143874e-01 -1.266467e-03
1.144025e-01 -2.431952e-03
1.144222e-01 -4.170715e-04
1.144249e-01 6.794853e-04
1.144256e-01 -2.384782e-04
1.144409e-01 -1.685505e-03
1.144431e-01 -1.511771e-06
1.144581e-01 1.455539e-03
1.144621e-01 -7.219497e-03
1.144638e-01 1.305346e-03
1.144640e-01 3.918488e-03
1.144658e-01 -1.408622e-03
1.144725e-01 6.994568e-04
1.144792e-01 9.321789e-03
1.145004e-01 2.676944e-03
1.145164e-01 -2.174390e-03
1.145367e-01 3.932964e-03
1.145417e-01 -8.149779e-04
1.145437e-01 1.199859e-03
1.145440e-01 8.267154e-04
1.145465e-01 2.044387e-03
1.145533e-01 2.376517e-03
1.145550e-01 -1.663707e-03
1.145562e-01 -2.156922e-03
1.145563e-01 -1.591278e-03
1.145767e-01 -2.110178e-03
1.145783e-01 -3.463189e-03
1.145795e-01 -1.163973e-03
1.145845e-01 -6.902058e-04
1.145865e-01 3.239254e-03
1.145882e-01 -9.563622e-04
1.145934e-01 -9.742923e-04
1.146031e-01 4.305221e-04
1.146084e-01 -8.267889e-04
1.146088e-01 3.572607e-03
1.146128e-01 6.974073e-04
1.146358e-01 2.353936e-04
1.146431e-01 3.156804e-03
1.146431e-01 3.156804e-03
1.146436e-01 -2.352696e-03
1.146584e-01 4.817179e-03
1.146665e-01 2.391247e-04
1.146671e-01 -1.614602e-03
1.146732e-01 2.188815e-03
1.146794e-01 -1.140471e-03
1.146880e-01 2.343333e-03
1.146924e-01 1.623969e-03
1.147035e-01 5.654529e-04
1.147071e-01 4.489334e-04
1.147232e-01 3.418192e-03
1.147244e-01 1.085189e-03
1.147314e-01 3.430617e-03
1.147354e-01 9.970989e-03
1.147494e-01 -2.969098e-03
1.147614e-01 1.889508e-04
1.147638e-01 3.938775e-04
1.147708e-01 -2.712755e-04
1.147830e-01 2.684309e-04
1.147855e-01 3.479421e-03
1.147916e-01 -3.720179e-04
1.148072e-01 3.546677e-03
1.148154e-01 -4.435192e-03
1.148210e-01 -4.275910e-04
1.148284e-01 3.777527e-04
1.148458e-01 7.384312e-04
1.148458e-01 7.384312e-04
1.148516e-01 8.967745e-04
1.148543e-01 -8.076518e-04
1.148628e-01 -1.901707e-03
1.148665e-01 2.712555e-03
1.148709e-01 3.048076e-03
1.148714e-01 9.590163e-04
1.148740e-01 -3.088562e-03
1.148749e-01 -1.056174e-03
1.148772e-01 1.606150e-03
1.148881e-01 1.422667e-04
1.148940e-01 4.635762e-03
1.148985e-01 2.708982e-03
1.149017e-01 -7.412908e-04
1.149152e-01 2.014737e-03
1.149247e-01 -7.740603e-04
1.149326e-01 4.818232e-06
1.149337e-01 2.936239e-03
1.149387e-01 -4.369801e-03
1.149434e-01 3.153151e-03
1.149554e-01 2.217773e-03
1.149624e-01 1.159561e-03
1.149669e-01 2.198540e-03
1.149934e-01 8.437004e-04
1.150017e-01 8.033213e-06
1.150079e-01 -6.868127e-04
1.150213e-01 3.236834e-03
1.150306e-01 8.017037e-04
1.150414e-01 -1.464238e-03
1.150479e-01 -1.396482e-03
1.150542e-01 1.161161e-05
1.150626e-01 2.136820e-03
1.150648e-01 -1.569070e-03
1.150804e-01 7.370841e-05
1.150862e-01 -1.586780e-03
1.150900e-01 -1.184684e-03
1.150990e-01 1.729365e-03
1.151032e-01 5.220341e-05
1.151077e-01 -3.279776e-03
1.151118e-01 7.364192e-04
1.151240e-01 -3.898832e-04
1.151244e-01 -1.791380e-03
1.151329e-01 7.610180e-04
1.151521e-01 3.838081e-04
1.151528e-01 -1.611811e-03
1.151551e-01 2.203272e-03
1.151628e-01 2.150215e-03
1.151640e-01 -4.123415e-04
1.151644e-01 -4.603642e-04
1.151789e-01 8.820844e-04
1.151868e-01 5.649715e-04
1.152055e-01 -2.491914e-03
1.152105e-01 2.504157e-03
1.152131e-01 1.402254e-03
1.152258e-01 1.836372e-03
1.152313e-01 2.529852e-03
1.152492e-01 6.801369e-04
1.152541e-01 5.582991e-04
1.152586e-01 9.112877e-04
1.152644e-01 -7.138561e-04
1.152691e-01 -1.994933e-03
1.152783e-01 -2.639424e-03
1.152794e-01 1.882432e-03
1.152802e-01 2.776929e-03
1.152996e-01 9.476032e-04
1.153015e-01 -1.995026e-03
1.153018e-01 9.353475e-04
1.153039e-01 -1.510240e-03
1.153060e-01 3.001297e-04
1.153089e-01 -5.480235e-04
1.153253e-01 1.834587e-03
1.153310e-01 -9.021289e-04
1.153343e-01 -3.712748e-04
1.153371e-01 -2.540891e-03
1.153425e-01 -1.573416e-07
1.153440e-01 -1.590387e-03
1.153633e-01 -3.668168e-04
1.153906e-01 1.169550e-03
1.153949e-01 9.831379e-04
1.154005e-01 8.013191e-04
1.154068e-01 1.563638e-04
1.154072e-01 -2.396837e-04
1.154157e-01 9.862499e-04
1.154209e-01 3.638345e-04
1.154330e-01 5.419535e-03
1.154386e-01 -8.094526e-04
1.154468e-01 2.193428e-03
1.154488e-01 -4.962669e-04
1.154614e-01 1.062665e-03
1.154618e-01 1.211897e-03
1.154656e-01 9.769091e-04
1.154792e-01 2.798776e-03
1.154883e-01 -4.785956e-04
1.154940e-01 -2.014627e-03
1.154991e-01 -5.032673e-04
1.155096e-01 6.437044e-04
1.155096e-01 -2.434779e-04
1.155248e-01 2.660379e-04
1.155325e-01 1.841270e-04
1.155337e-01 -2.747569e-03
1.155346e-01 1.623807e-03
1.155396e-01 1.154528e-03
1.155450e-01 5.582175e-03
1.155528e-01 2.925751e-03
1.155572e-01 -1.084012e-03
1.155613e-01 6.689789e-04
1.155617e-01 -2.792132e-04
1.155767e-01 -1.638111e-04
1.155793e-01 5.547477e-03
1.155880e-01 2.502306e-04
1.155924e-01 1.977137e-03
1.155929e-01 1.408498e-04
1.155946e-01 -6.698099e-04
1.156016e-01 2.013278e-03
1.156047e-01 -1.636104e-03
1.156192e-01 -1.474006e-03
1.156198e-01 1.816085e-03
1.156287e-01 -1.786130e-03
1.156334e-01 3.100665e-03
1.156334e-01 3.100665e-03
1.156465e-01 3.976567e-03
1.156485e-01 1.310516e-03
1.156493e-01 3.784233e-03
1.156574e-01 8.507859e-04
1.156574e-01 8.507859e-04
1.156669e-01 1.567622e-03
1.156715e-01 -3.520791e-03
1.156862e-01 -2.485941e-03
1.156928e-01 4.588822e-03
1.156951e-01 -1.835284e-03
1.157147e-01 1.128783e-03
1.157150e-01 1.275334e-04
1.157207e-01 2.872890e-03
1.157317e-01 3.550510e-03
1.157327e-01 1.739112e-04
1.157371e-01 -2.348956e-04
1.157390e-01 -1.939879e-03
1.157411e-01 2.635874e-04
1.157501e-01 6.262334e-04
1.157515e-01 1.271583e-03
1.157639e-01 9.772285e-04
1.157828e-01 4.634539e-03
1.157852e-01 2.954171e-03
1.157985e-01 -9.873895e-04
1.158026e-01 8.040426e-04
1.158057e-01 2.711404e-04
1.158108e-01 -3.039388e-03
1.158188e-01 4.423895e-04
1.158326e-01 1.129090e-04
1.158389e-01 -3.570192e-03
1.158389e-01 -1.139439e-03
1.158389e-01 -1.139439e-03
1.158404e-01 9.890868e-04
1.158452e-01 1.770058e-03
1.158560e-01 -1.471286e-03
1.158564e-01 1.389156e-03
1.158605e-01 -9.159706e-04
1.158771e-01 1.166552e-03
1.158775e-01 -1.066591e-03
1.158911e-01 3.425445e-04
1.158916e-01 -1.514537e-03
1.159266e-01 -3.064839e-03
1.159281e-01 2.341831e-03
1.159342e-01 1.914983e-03
1.159384e-01 9.635986e-05
1.159475e-01 3.510650e-03
1.159525e-01 4.858731e-04
1.159614e-01 -5.816748e-05
1.159617e-01 -2.447410e-03
1.159793e-01 6.776980e-04
1.159810e-01 5.251396e-03
1.159819e-01 -2.325315e-03
1.159844e-01 -1.730765e-03
1.159925e-01 6.777641e-04
1.159933e-01 1.377182e-03
1.159951e-01 1.695627e-03
1.159970e-01 -1.439227e-03
1.159973e-01 -1.961313e-03
1.160063e-01 8.027699e-04
1.160065e-01 4.652025e-04
1.160104e-01 -1.975592e-03
1.160238e-01 3.469115e-03
1.160371e-01 -1.768816e-03
1.160380e-01 3.067941e-04
1.160410e-01 -3.408769e-03
1.160410e-01 -1.348867e-03
1.160442e-01 3.079314e-03
1.160479e-01 6.315446e-03
1.160579e-01 -4.216324e-03
1.160669e-01 2.393544e-03
1.160747e-01 -1.665941e-03
1.160758e-01 1.234787e-03
1.160767e-01 1.656575e-03
1.160774e-01 5.191777e-04
1.160784e-01 1.029504e-03
1.160852e-01 1.592306e-03
1.160891e-01 1.985634e-03
1.160906e-01 3.665829e-03
1.160920e-01 -1.990421e-03
1.160972e-01 2.124736e-03
1.160976e-01 -1.502343e-03
1.161122e-01 -1.585472e-03
1.161229e-01 -2.139080e-04
1.161252e-01 1.511611e-03
1.161255e-01 6.327722e-04
1.161294e-01 1.037778e-03
1.161351e-01 -3.078182e-03
1.161386e-01 -1.547830e-03
1.161420e-01 1.883229e-03
1.161533e-01 1.780918e-03
1.161569e-01 -1.615963e-03
1.161601e-01 3.324327e-03
1.161623e-01 4.838229e-04
1.161675e-01 1.191453e-03
1.161799e-01 1.392870e-03
1.161809e-01 2.521715e-03
1.161815e-01 -9.895622e-04
1.161842e-01 -1.548082e-04
1.161967e-01 -1.982409e-03
1.161967e-01 -1.982409e-03
1.162068e-01 1.098607e-03
1.162102e-01 1.162017e-03
1.162107e-01 1.937567e-03
1.162154e-01 -1.977374e-03
1.162241e-01 5.659561e-03
1.162255e-01 6.936340e-04
1.162318e-01 2.215525e-04
1.162385e-01 3.038935e-03
1.162418e-01 -1.230304e-04
1.162434e-01 2.663636e-03
1.162475e-01 3.646722e-03
1.162532e-01 -3.246495e-03
1.162532e-01 -3.246495e-03
1.162573e-01 3.169337e-05
1.162598e-01 -1.550261e-03
1.162720e-01 -4.828701e-04
1.162743e-01 1.558186e-03
1.162758e-01 2.705598e-03
1.163021e-01 -5.855593e-04
1.163032e-01 1.698095e-03
1.163036e-01 6.788250e-04
1.163054e-01 -1.711904e-03
1.163065e-01 5.237193e-04
1.163137e-01 -1.817239e-03
1.163137e-01 -1.817239e-03
1.163172e-01 -3.483435e-03
1.163274e-01 1.496790e-03
1.163506e-01 8.230406e-04
1.163511e-01 -1.823859e-03
1.163512e-01 1.996608e-03
1.163516e-01 -2.713008e-03
1.163520e-01 7.842374e-04
1.163537e-01 -4.082598e-03
1.163620e-01 -2.388130e-03
1.163647e-01 7.469185e-04
1.163719e-01 1.535883e-04
1.163739e-01 -1.267324e-04
1.163841e-01 2.644142e-03
1.163901e-01 6.441677e-03
1.163961e-01 4.075920e-03
1.163973e-01 1.419548e-03
1.164003e-01 -4.456420e-03
1.164062e-01 3.806576e-03
1.164104e-01 6.516404e-04
1.164201e-01 -1.237535e-03
1.164259e-01 1.235907e-03
1.164275e-01 3.425324e-03
1.164281e-01 -1.581337e-04
1.164303e-01 4.270930e-03
1.164348e-01 3.094066e-03
1.164387e-01 7.011019e-03
1.164394e-01 -2.427525e-03
1.164549e-01 3.452628e-03
1.164587e-01 -3.068837e-03
1.164754e-01 -1.308295e-03
1.164860e-01 -1.370484e-03
1.164905e-01 -1.826980e-03
1.164923e-01 4.037407e-04
1.164960e-01 2.099629e-03
1.165008e-01 8.503522e-03
1.165045e-01 -3.729051e-03
1.165082e-01 -1.640979e-03
1.165130e-01 1.159892e-03
1.165206e-01 -6.802148e-05
1.165256e-01 2.311265e-03
1.165285e-01 1.171037e-03
1.165317e-01 -1.417274e-03
1.165518e-01 -1.953212e-04
1.165536e-01 1.592196e-05
1.165557e-01 7.008853e-04
1.165611e-01 -1.275818e-03
1.165646e-01 -1.228165e-03
1.165816e-01 -1.907191e-03
1.166078e-01 -3.661002e-04
1.166118e-01 -1.291783e-03
1.166138e-01 3.926824e-04
1.166152e-01 8.739424e-04
1.166152e-01 8.739424e-04
1.166225e-01 -3.014996e-03
1.166264e-01 3.627980e-03
1.166342e-01 2.637275e-03
1.166444e-01 -1.205157e-03
1.166498e-01 4.175762e-05
1.166512e-01 5.853226e-05
1.166589e-01 -8.507590e-04
1.166591e-01 4.512178e-03
1.166683e-01 2.983184e-04
1.166683e-01 2.983184e-04
1.166772e-01 4.014053e-04
1.167001e-01 3.789862e-03
1.167020e-01 -1.506061e-04
1.167059e-01 -1.354106e-03
1.167147e-01 2.473342e-03
1.167239e-01 1.066325e-03
1.167331e-01 -2.614771e-04
1.167467e-01 4.291835e-04
1.167503e-01 -1.522679e-03
1.167546e-01 1.130919e-03
1.167556e-01 2.639789e-03
1.167564e-01 -1.643651e-03
1.167608e-01 6.820208e-03
1.167615e-01 7.145776e-03
1.167623e-01 -7.189410e-04
1.167645e-01 1.568835e-03
1.167690e-01 -1.419292e-03
1.167714e-01 -1.824267e-03
1.167875e-01 -1.083975e-03
1.167947e-01 2.580418e-03
1.167957e-01 -6.293206e-04
1.168114e-01 1.739360e-04
1.168229e-01 -1.590885e-03
1.168607e-01 -2.394758e-04
1.168709e-01 2.099146e-03
1.168734e-01 1.901435e-03
1.168740e-01 -9.248123e-04
1.168786e-01 2.445822e-03
1.168859e-01 -3.593692e-03
1.168897e-01 2.345147e-03
1.168954e-01 -1.587243e-03
1.168980e-01 2.349849e-03
1.169001e-01 -1.119629e-03
1.169107e-01 5.478175e-04
1.169155e-01 -2.339945e-03
1.169206e-01 -9.634414e-04
1.169382e-01 1.704288e-03
1.169602e-01 -2.321788e-03
1.169650e-01 2.684416e-05
1.169665e-01 6.213681e-03
1.169739e-01 1.516454e-03
1.169792e-01 3.255169e-03
1.169807e-01 1.023184e-03
1.169820e-01 2.376381e-03
1.169860e-01 -1.306413e-03
1.169864e-01 1.592574e-03
1.169975e-01 1.722103e-03
1.169975e-01 1.722103e-03
1.170002e-01 -6.754789e-04
1.170074e-01 6.198122e-03
1.170076e-01 8.255074e-04
1.170125e-01 -1.442054e-03
1.170210e-01 2.899853e-04
1.170261e-01 -1.253151e-03
1.170339e-01 1.825407e-04
1.170346e-01 -3.550107e-04
1.170352e-01 -7.205692e-05
1.170352e-01 -7.205692e-05
1.170355e-01 -7.779350e-04
1.170385e-01 1.761786e-03
1.170387e-01 -3.072296e-04
1.170400e-01 1.022914e-03
1.170465e-01 1.270353e-03
1.170501e-01 7.691099e-04
1.170562e-01 -1.131704e-03
1.170977e-01 1.714918e-03
1.171007e-01 1.906174e-03
1.171054e-01 -1.264175e-03
1.171099e-01 1.008730e-03
1.171142e-01 2.138574e-03
1.171213e-01 5.754580e-04
1.171285e-01 -7.528579e-04
1.171297e-01 4.760212e-04
1.171488e-01 6.660598e-03
1.171556e-01 3.049384e-04
1.171578e-01 4.997846e-03
1.171622e-01 2.552772e-03
1.171664e-01 1.203988e-03
1.171777e-01 4.191420e-03
1.171781e-01 7.969605e-04
1.171782e-01 -1.399975e-03
1.171879e-01 6.843715e-04
1.171879e-01 6.843715e-04
1.171932e-01 1.740434e-03
1.171999e-01 -3.325868e-03
1.172008e-01 -6.429041e-04
1.172096e-01 1.782735e-03
1.172112e-01 -6.004840e-04
1.172120e-01 -1.358127e-03
1.172145e-01 2.428450e-03
1.172151e-01 4.475987e-04
1.172216e-01 1.500931e-03
1.172384e-01 1.084024e-04
1.172473e-01 4.253406e-04
1.172505e-01 -1.986980e-04
1.172526e-01 1.380189e-03
1.172594e-01 3.894983e-04
1.172605e-01 1.381366e-03
1.172671e-01 5.399476e-04
1.172744e-01 -1.978306e-04
1.172828e-01 -2.232772e-03
1.172850e-01 -2.154843e-03
1.172904e-01 3.423989e-04
1.172932e-01 2.666396e-04
1.172982e-01 -7.021299e-04
1.173076e-01 -3.031623e-04
1.173152e-01 -1.907058e-04
1.173159e-01 -1.878275e-03
1.173177e-01 -9.440662e-04
1.173240e-01 -1.982314e-03
1.173402e-01 8.637006e-04
1.173470e-01 8.218036e-04
1.173575e-01 -8.195747e-04
1.173652e-01 1.979549e-03
1.173657e-01 -4.097077e-03
1.173818e-01 -6.324563e-04
1.173967e-01 3.748880e-03
1.173967e-01 3.748880e-03
1.174005e-01 3.658387e-03
1.174093e-01 -2.588223e-04
1.174102e-01 2.139756e-03
1.174107e-01 -2.189891e-04
1.174181e-01 5.577473e-04
1.174229e-01 2.796592e-03
1.174247e-01 5.269842e-04
1.174296e-01 1.712213e-03
1.174307e-01 1.067651e-03
1.174564e-01 4.578123e-04
1.174566e-01 -9.941963e-05
1.174662e-01 -9.452272e-04
1.174721e-01 3.623313e-04
1.174832e-01 2.480201e-03
1.174836e-01 1.861594e-03
1.174857e-01 -1.354038e-03
1.174870e-01 1.464330e-03
1.174898e-01 2.719946e-04
1.174920e-01 -8.644178e-04
1.175020e-01 -2.110664e-03
1.175072e-01 1.737976e-03
1.175110e-01 -1.970056e-03
1.175182e-01 7.325534e-04
1.175195e-01 -8.780996e-04
1.175262e-01 9.220838e-04
1.175293e-01 2.315325e-03
1.175325e-01 1.763849e-03
1.175521e-01 1.421570e-03
1.175526e-01 -1.291421e-03
1.175586e-01 7.058295e-03
1.175601e-01 3.443547e-03
1.175608e-01 8.699296e-03
1.175656e-01 7.380522e-04
1.175695e-01 1.137820e-03
1.175734e-01 3.643873e-03
1.175738e-01 1.550139e-03
1.175766e-01 2.917066e-03
1.175935e-01 -6.832966e-04
1.175942e-01 -9.672938e-06
1.176187e-01 9.814213e-05
1.176189e-01 2.118222e-04
1.176222e-01 -2.068421e-03
1.176227e-01 -2.176308e-03
1.176246e-01 -4.269593e-04
1.176364e-01 -1.124225e-03
1.176420e-01 3.063676e-03
1.176501e-01 -1.293475e-03
1.176542e-01 7.158950e-04
1.176573e-01 -1.031142e-03
1.176574e-01 1.739151e-03
1.176600e-01 3.758124e-04
1.176648e-01 1.127674e-03
1.176902e-01 1.753592e-04
1.176938e-01 4.955395e-03
1.177024e-01 3.653432e-04
1.177047e-01 1.931267e-03
1.177064e-01 -2.203756e-03
1.177154e-01 -6.939966e-04
1.177213e-01 8.603111e-04
1.177254e-01 1.714409e-03
1.177310e-01 9.682979e-05
1.177348e-01 2.092673e-04
1.177367e-01 1.527732e-03
1.177371e-01 -1.069356e-03
1.177402e-01 5.853952e-04
1.177577e-01 -1.116188e-03
1.177583e-01 -7.249820e-05
1.177790e-01 -1.757844e-03
1.177812e-01 -8.983702e-04
1.177845e-01 1.233850e-04
1.177977e-01 -3.755021e-03
1.178140e-01 -2.024205e-03
1.178231e-01 -6.470518e-04
1.178276e-01 7.135046e-04
1.178550e-01 -6.277952e-04
1.178557e-01 -2.032275e-03
1.178746e-01 1.447662e-03
1.178858e-01 -1.073826e-03
1.178917e-01 -9.958342e-04
1.178952e-01 -9.046827e-04
1.179090e-01 -8.678071e-04
1.179096e-01 1.764343e-03
1.179144e-01 -2.163148e-03
1.179323e-01 1.163714e-03
1.179538e-01 -2.312763e-03
1.179593e-01 7.380059e-04
1.179657e-01 1.008121e-02
1.179675e-01 1.358042e-04
1.179676e-01 6.139403e-03
1.179711e-01 5.934116e-04
1.179733e-01 -1.771432e-03
1.179743e-01 8.936741e-04
1.179767e-01 -4.373584e-03
1.179829e-01 4.642768e-03
1.179880e-01 -1.767084e-03
1.179882e-01 -6.598930e-04
1.179897e-01 2.885798e-04
1.179912e-01 8.765493e-04
1.179927e-01 -4.651492e-04
1.180021e-01 -1.540708e-03
1.180085e-01 3.574303e-03
1.180125e-01 -2.763167e-04
1.180162e-01 -2.007289e-03
1.180333e-01 3.580615e-03
1.180337e-01 4.643599e-03
1.180501e-01 8.506438e-03
1.180505e-01 1.493091e-03
1.180578e-01 1.274853e-03
1.180579e-01 -1.242453e-03
1.180905e-01 4.996932e-03
1.180937e-01 2.663027e-03
1.181176e-01 3.492479e-05
1.181201e-01 9.682300e-05
1.181354e-01 5.796783e-04
1.181407e-01 -3.613376e-04
1.181421e-01 -9.417348e-04
1.181529e-01 -1.378279e-03
1.181597e-01 3.027002e-03
1.181612e-01 -2.069894e-03
1.181653e-01 -2.445684e-03
1.181758e-01 -2.862110e-03
1.181909e-01 -1.810137e-04
1.181950e-01 4.550030e-04
1.181993e-01 -2.491020e-03
1.182044e-01 -3.752404e-05
1.182118e-01 1.609377e-03
1.182153e-01 2.835091e-03
1.182253e-01 1.271240e-03
1.182358e-01 1.305295e-03
1.182380e-01 -2.498491e-03
1.182442e-01 4.123344e-03
1.182577e-01 1.887597e-04
1.182600e-01 -1.055750e-03
1.182644e-01 -2.347569e-03
1.182686e-01 -4.074951e-03
1.182702e-01 -3.731370e-03
1.182736e-01 -2.079208e-03
1.182746e-01 3.432160e-03
1.182791e-01 -4.090786e-04
1.182832e-01 8.063499e-04
1.182843e-01 7.196275e-04
1.182885e-01 7.032175e-03
1.183038e-01 1.122183e-04
1.183110e-01 1.392298e-03
1.183253e-01 8.095148e-04
1.183290e-01 1.693471e-03
1.183361e-01 -1.678902e-03
1.183433e-01 1.927394e-03
1.183494e-01 -9.326492e-04
1.183524e-01 -2.654318e-04
1.183546e-01 1.973070e-03
1.183560e-01 -3.714666e-04
1.183571e-01 3.362126e-03
1.183581e-01 4.355019e-03
1.183609e-01 1.507653e-03
1.183709e-01 7.922765e-04
1.183818e-01 -3.492150e-04
1.183818e-01 -3.492150e-04
1.183838e-01 -3.435028e-03
1.183908e-01 3.627218e-03
1.183953e-01 5.373734e-04
1.183954e-01 -3.702695e-03
1.184072e-01 5.370173e-03
1.184177e-01 -8.579018e-05
1.184309e-01 1.248865e-03
1.184455e-01 5.416702e-03
1.184466e-01 7.632109e-05
1.184487e-01 3.818466e-04
1.184545e-01 4.609809e-03
1.184576e-01 -1.503585e-03
1.184592e-01 1.128326e-03
1.184678e-01 8.072678e-04
1.184768e-01 -2.492367e-05
1.184967e-01 -1.612152e-03
1.185016e-01 7.546221e-04
1.185114e-01 4.064139e-03
1.185145e-01 -1.345060e-03
1.185163e-01 -1.940287e-03
1.185176e-01 1.360223e-03
1.185180e-01 1.116138e-04
1.185426e-01 -3.621782e-04
1.185560e-01 2.055866e-03
1.185615e-01 4.232430e-03
1.185635e-01 1.197809e-03
1.185805e-01 -2.769496e-03
1.185819e-01 -6.736077e-04
1.185851e-01 5.974752e-04
1.185911e-01 -1.262628e-03
1.185911e-01 -1.262628e-03
1.185911e-01 1.503050e-02
1.186005e-01 4.841478e-04
1.186154e-01 -1.220674e-04
1.186212e-01 1.351984e-03
1.186248e-01 1.150246e-03
1.186356e-01 3.486642e-04
1.186402e-01 1.119474e-03
1.186425e-01 -1.885815e-03
1.186437e-01 2.795244e-03
1.186447e-01 1.929801e-03
1.186464e-01 1.054396e-03
1.186595e-01 1.199109e-03
1.186602e-01 -2.895901e-04
1.186634e-01 -2.456547e-03
1.186844e-01 -7.054276e-04
1.186881e-01 -2.786324e-04
1.186888e-01 -3.463568e-03
1.187017e-01 -1.379709e-03
1.187017e-01 -1.379709e-03
1.187064e-01 3.178171e-03
1.187092e-01 7.844891e-04
1.187111e-01 6.019169e-03
1.187129e-01 4.730276e-03
1.187175e-01 2.634477e-03
1.187328e-01 1.112509e-03
1.187335e-01 1.775688e-03
1.187420e-01 1.468066e-03
1.187441e-01 2.787983e-03
1.187469e-01 1.138515e-03
1.187477e-01 3.905586e-05
1.187514e-01 2.001595e-03
1.187541e-01 1.484950e-03
1.187569e-01 3.763473e-03
1.187622e-01 -6.121274e-04
1.187647e-01 2.690034e-03
1.187675e-01 -4.272203e-04
1.187738e-01 2.037484e-05
1.187751e-01 -8.313404e-04
1.187776e-01 6.491498e-03
1.187872e-01 2.875054e-03
1.187902e-01 5.541721e-04
1.187906e-01 -7.083852e-04
1.187909e-01 -5.187620e-04
1.187914e-01 7.188706e-03
1.188032e-01 4.817401e-03
1.188106e-01 2.121654e-03
1.188122e-01 8.320220e-04
1.188148e-01 1.218568e-03
1.188300e-01 -2.398624e-03
1.188362e-01 -9.416274e-04
1.188459e-01 2.887540e-03
1.188482e-01 -7.478266e-04
1.188517e-01 3.093117e-03
1.188517e-01 3.093117e-03
1.188583e-01 -1.947246e-03
1.188641e-01 2.095929e-03
1.188706e-01 2.786809e-03
1.188708e-01 1.011042e-03
1.188817e-01 -8.922945e-04
1.188843e-01 5.409288e-03
1.188945e-01 -2.088066e-03
1.189071e-01 -2.555752e-03
1.189076e-01 9.971208e-04
1.189136e-01 -2.152754e-03
1.189249e-01 -1.608364e-03
1.189277e-01 1.909471e-03
1.189277e-01 1.909471e-03
1.189332e-01 -1.937478e-03
1.189341e-01 -2.494493e-03
1.189355e-01 1.061223e-03
1.189397e-01 -2.599073e-03
1.189415e-01 2.913568e-04
1.189515e-01 1.067985e-02
1.189539e-01 -1.267121e-03
1.189581e-01 2.864302e-03
1.189613e-01 8.419851e-04
1.189649e-01 -2.064122e-03
1.189721e-01 -1.111582e-03
1.189770e-01 3.356735e-04
1.189823e-01 2.544419e-04
1.189900e-01 2.460284e-03
1.189925e-01 -5.103665e-04
1.189997e-01 7.357495e-04
1.190015e-01 7.164795e-03
1.190033e-01 6.129996e-04
1.190051e-01 1.770654e-03
1.190121e-01 -1.098558e-03
1.190186e-01 -7.275372e-04
1.190228e-01 9.818962e-04
1.190233e-01 8.069037e-04
1.190262e-01 -7.377536e-04
1.190336e-01 1.701655e-03
1.190402e-01 -1.515860e-06
1.190653e-01 1.656066e-03
1.190698e-01 -3.884029e-03
1.190721e-01 2.520798e-03
1.190737e-01 3.302701e-03
1.190800e-01 -3.696544e-04
1.190800e-01 -1.778059e-03
1.190834e-01 -1.073738e-03
1.190881e-01 1.869366e-04
1.190882e-01 1.047216e-03
1.190924e-01 -9.382095e-04
1.191027e-01 -1.957519e-03
1.191079e-01 2.324722e-03
1.191172e-01 -1.121952e-03
1.191192e-01 5.376447e-03
1.191201e-01 -3.347089e-03
1.191242e-01 2.236487e-03
1.191260e-01 1.424711e-03
1.191278e-01 1.306918e-03
1.191296e-01 -7.978619e-04
1.191317e-01 -6.340057e-04
1.191317e-01 -6.340057e-04
1.191462e-01 -4.375519e-04
1.191501e-01 4.331528e-03
1.191533e-01 2.918344e-03
1.191623e-01 -1.615819e-03
1.191662e-01 -1.396455e-05
1.191680e-01 5.923701e-05
1.191698e-01 3.179210e-03
1.191883e-01 1.942573e-04
1.191890e-01 9.753991e-04
1.191918e-01 3.098771e-03
1.191930e-01 1.140606e-03
1.192200e-01 4.540383e-04
1.192205e-01 2.591639e-03
1.192381e-01 1.987963e-03
1.192392e-01 2.528349e-04
1.192396e-01 3.476658e-03
1.192396e-01 3.476658e-03
1.192416e-01 -3.469077e-04
1.192567e-01 2.531156e-04
1.192600e-01 7.232016e-04
1.192719e-01 -1.209318e-03
1.192745e-01 -4.269033e-04
1.192820e-01 -1.032019e-03
1.192876e-01 -1.177488e-03
1.192876e-01 -1.177488e-03
1.192916e-01 1.145080e-03
1.192944e-01 -1.948186e-03
1.192948e-01 1.362535e-03
1.193050e-01 -1.633036e-03
1.193051e-01 1.598837e-03
1.193191e-01 1.759336e-03
1.193329e-01 1.462653e-03
1.193378e-01 -1.643979e-03
1.193517e-01 4.051324e-04
1.193588e-01 -1.657878e-03
1.193746e-01 1.726135e-04
1.193761e-01 1.241518e-03
1.193761e-01 1.241518e-03
1.193817e-01 1.075011e-03
1.193821e-01 5.075901e-03
1.193964e-01 5.331660e-03
1.194090e-01 4.700755e-03
1.194162e-01 -2.130330e-03
1.194208e-01 -1.074245e-03
1.194244e-01 -4.734112e-04
1.194290e-01 -7.690557e-04
1.194484e-01 1.220692e-03
1.194584e-01 3.031389e-03
1.194624e-01 7.339329e-04
1.194665e-01 7.386368e-04
1.194666e-01 2.164689e-03
1.194669e-01 -1.433806e-03
1.194844e-01 6.155774e-03
1.194884e-01 9.346324e-04
1.194942e-01 1.220557e-03
1.194966e-01 -1.402969e-03
1.195009e-01 -1.140143e-03
1.195025e-01 7.071161e-04
1.195040e-01 5.502434e-04
1.195100e-01 5.375124e-03
1.195129e-01 -5.478034e-04
1.195157e-01 -1.360104e-03
1.195196e-01 3.735973e-03
1.195303e-01 9.154499e-04
1.195303e-01 9.154499e-04
1.195342e-01 -2.215749e-03
1.195363e-01 -1.547110e-03
1.195373e-01 2.833577e-04
1.195376e-01 5.386287e-04
1.195387e-01 1.279744e-04
1.195430e-01 -8.115275e-04
1.195534e-01 2.281530e-03
1.195590e-01 -1.436894e-03
1.195644e-01 -3.474699e-03
1.195662e-01 -1.761568e-04
1.195749e-01 6.294357e-04
1.195833e-01 1.794292e-04
1.195841e-01 7.135909e-04
1.195987e-01 -2.610209e-03
1.196015e-01 -1.904628e-03
1.196017e-01 3.892795e-03
1.196127e-01 4.693935e-03
1.196179e-01 -1.246644e-05
1.196195e-01 7.147066e-05
1.196212e-01 -5.702171e-04
1.196212e-01 -5.702171e-04
1.196342e-01 -2.884739e-03
1.196464e-01 1.046040e-03
1.196483e-01 -1.328085e-03
1.196506e-01 -1.018060e-03
1.196531e-01 4.294973e-03
1.196827e-01 7.924646e-05
1.196904e-01 8.726218e-05
1.196977e-01 1.413792e-03
1.196981e-01 9.131922e-04
1.196999e-01 6.287681e-04
1.197003e-01 4.299398e-04
1.197026e-01 1.835997e-03
1.197047e-01 4.195996e-04
1.197074e-01 -1.756623e-03
1.197145e-01 -1.908577e-03
1.197196e-01 5.452416e-05
1.197225e-01 8.187349e-04
1.197342e-01 2.856999e-03
1.197413e-01 9.169723e-04
1.197472e-01 -1.867298e-05
1.197548e-01 -2.489119e-03
1.197550e-01 3.436796e-03
1.197580e-01 1.112935e-03
1.197700e-01 -1.363862e-03
1.197726e-01 -2.609888e-03
1.197841e-01 7.125945e-04
1.197882e-01 6.517604e-03
1.197929e-01 -1.281524e-03
1.197965e-01 2.997091e-03
1.197978e-01 -4.570251e-04
1.197985e-01 -1.277988e-03
1.198004e-01 -1.513184e-03
1.198018e-01 2.513368e-03
1.198089e-01 2.163553e-03
1.198147e-01 5.762450e-03
1.198165e-01 -1.396126e-03
1.198247e-01 4.980946e-03
1.198285e-01 4.316786e-04
1.198331e-01 -3.923805e-03
1.198424e-01 -3.386750e-03
1.198472e-01 -1.254713e-03
1.198583e-01 -1.762248e-03
1.198628e-01 5.929587e-03
1.198629e-01 -3.979678e-04
1.198702e-01 2.716014e-03
1.198708e-01 3.368136e-03
1.198735e-01 -3.320959e-03
1.198764e-01 2.462138e-03
1.199012e-01 4.223285e-03
1.199067e-01 2.235012e-03
1.199191e-01 -1.316915e-03
1.199203e-01 5.333869e-05
1.199204e-01 -6.041143e-04
1.199281e-01 -1.614927e-03
1.199293e-01 2.988693e-03
1.199393e-01 3.024262e-03
1.199429e-01 -5.853175e-04
1.199430e-01 1.296033e-04
1.199442e-01 -2.654697e-04
1.199462e-01 2.884262e-04
1.199476e-01 7.318070e-04
1.199524e-01 6.627270e-04
1.199594e-01 2.317781e-03
1.199630e-01 2.830108e-04
1.199683e-01 1.273500e-03
1.199697e-01 -1.397795e-03
1.199700e-01 6.932992e-04
1.199720e-01 3.636343e-05
1.199763e-01 4.186986e-04
1.199791e-01 1.037931e-03
1.199854e-01 2.305911e-03
1.200043e-01 -1.635038e-03
1.200078e-01 -4.552169e-04
1.200082e-01 -6.464248e-04
1.200113e-01 4.391407e-03
1.200122e-01 -1.531082e-03
1.200141e-01 3.937599e-04
1.200214e-01 2.211157e-04
1.200305e-01 -3.540983e-04
1.200377e-01 -1.518949e-03
1.200383e-01 8.523169e-04
1.200409e-01 -1.866836e-03
1.200409e-01 -1.866836e-03
1.200421e-01 1.062315e-03
1.200487e-01 -1.128426e-03
1.200546e-01 -1.562730e-03
1.200571e-01 -1.191419e-03
1.200607e-01 7.091369e-03
1.200721e-01 -1.306732e-03
1.200781e-01 9.227690e-04
1.200861e-01 2.622613e-03
1.200997e-01 2.913031e-03
1.201009e-01 -6.361349e-04
1.201017e-01 3.481138e-04
1.201058e-01 1.081474e-04
1.201080e-01 3.632203e-04
1.201193e-01 -1.474028e-03
1.201294e-01 4.620992e-04
1.201320e-01 -8.189438e-04
1.201333e-01 -1.464881e-03
1.201363e-01 -3.872943e-03
1.201411e-01 -7.045818e-04
1.201446e-01 7.386326e-04
1.201488e-01 1.429376e-03
1.201518e-01 4.595337e-03
1.201564e-01 -1.113809e-03
1.201574e-01 -1.250928e-03
1.201870e-01 -7.517567e-04
1.201878e-01 9.490226e-04
1.201892e-01 -3.461741e-04
1.201967e-01 3.131458e-03
1.201985e-01 2.369637e-03
1.202023e-01 2.136629e-03
1.202113e-01 -1.059632e-03
1.202241e-01 6.551437e-05
1.202284e-01 4.695723e-03
1.202316e-01 -1.185843e-03
1.202328e-01 6.304567e-04
1.202328e-01 6.304567e-04
1.202350e-01 1.493884e-03
1.202361e-01 6.295101e-04
1.202405e-01 -1.704973e-04
1.202449e-01 1.664151e-03
1.202450e-01 -1.365380e-03
1.202500e-01 -1.394603e-03
1.202570e-01 1.684560e-03
1.202616e-01 7.487024e-04
1.202648e-01 4.195991e-03
1.202734e-01 -4.449675e-04
1.202735e-01 1.769411e-03
1.202735e-01 1.769411e-03
1.202752e-01 -3.563535e-04
1.202779e-01 -1.594037e-03
1.202846e-01 2.332739e-03
1.202893e-01 1.128239e-03
1.202922e-01 -9.336620e-04
1.202923e-01 2.157756e-03
1.202923e-01 2.157756e-03
1.203023e-01 -1.813567e-04
1.203027e-01 1.173304e-03
1.203156e-01 1.179683e-03
1.203175e-01 -2.232429e-03
1.203177e-01 -1.574367e-03
1.203266e-01 -3.252727e-04
1.203275e-01 -2.090023e-04
1.203290e-01 2.911609e-03
1.203400e-01 -2.074108e-03
1.203412e-01 1.362682e-03
1.203600e-01 4.556492e-04
1.203681e-01 4.108881e-03
1.203698e-01 -3.415733e-03
1.203781e-01 5.146008e-03
1.203879e-01 8.186593e-04
1.203901e-01 5.408437e-03
1.203916e-01 1.473809e-03
1.203946e-01 -1.072362e-03
1.203948e-01 2.917506e-03
1.203954e-01 1.667577e-03
1.203975e-01 -7.883863e-04
1.203987e-01 2.006786e-03
1.203990e-01 1.095122e-03
1.204056e-01 -2.022706e-03
1.204125e-01 -3.034087e-03
1.204130e-01 1.401350e-04
1.204167e-01 1.203768e-03
1.204226e-01 -1.741313e-03
1.204299e-01 2.615805e-04
1.204312e-01 -1.022791e-03
1.204375e-01 8.885826e-04
1.204417e-01 4.459911e-03
1.204422e-01 1.174740e-03
1.204470e-01 4.735084e-03
1.204490e-01 -4.064758e-03
1.204507e-01 2.914186e-03
1.204594e-01 5.554830e-05
1.204612e-01 -1.275854e-03
1.204614e-01 1.274720e-03
1.204765e-01 7.942918e-04
1.204819e-01 8.290571e-04
1.204863e-01 4.515863e-04
1.204866e-01 5.157598e-04
1.204988e-01 -3.209636e-03
1.205005e-01 -2.041616e-03
1.205039e-01 6.181207e-04
1.205094e-01 1.765614e-03
1.205106e-01 8.853354e-04
1.205210e-01 6.702660e-04
1.205248e-01 8.188067e-04
1.205305e-01 2.250136e-03
1.205389e-01 -2.285451e-04
1.205476e-01 -3.869067e-04
1.205521e-01 2.806118e-03
1.205711e-01 4.300341e-03
1.205711e-01 4.300341e-03
1.205937e-01 -2.503461e-03
1.206123e-01 -2.206143e-03
1.206257e-01 6.740052e-04
1.206263e-01 4.470699e-04
1.206330e-01 -1.841302e-03
1.206423e-01 9.135723e-04
1.206456e-01 1.564781e-03
1.206617e-01 7.925686e-03
1.206705e-01 1.524847e-03
1.206792e-01 -1.309930e-03
1.206850e-01 3.891471e-04
1.206886e-01 -1.129880e-03
1.206895e-01 -1.881665e-04
1.206913e-01 -1.527711e-03
1.206950e-01 2.039950e-04
1.206988e-01 -3.182698e-03
1.206997e-01 4.201447e-04
1.207236e-01 -8.934541e-04
1.207326e-01 3.421959e-03
1.207479e-01 -5.983902e-05
1.207479e-01 -5.983902e-05
1.207518e-01 2.696650e-03
1.207530e-01 1.364112e-03
1.207586e-01 1.835146e-04
1.207793e-01 -5.992305e-04
1.207827e-01 -1.699836e-03
1.207832e-01 1.142921e-03
1.207854e-01 -7.278385e-04
1.207911e-01 5.833749e-03
1.207939e-01 1.225687e-05
1.208030e-01 -9.386623e-04
1.208331e-01 -3.624326e-04
1.208412e-01 1.089947e-03
1.208528e-01 -2.001718e-04
1.208653e-01 1.120565e-03
1.208657e-01 1.211113e-03
1.208723e-01 -2.147078e-03
1.208823e-01 -2.693293e-03
1.208884e-01 3.138342e-03
1.208936e-01 5.577165e-04
1.208956e-01 -1.961622e-03
1.208993e-01 2.066431e-03
1.209041e-01 -2.087497e-03
1.209108e-01 4.948874e-03
1.209204e-01 -5.318947e-04
1.209213e-01 5.367319e-03
1.209261e-01 8.742939e-04
1.209275e-01 1.969323e-03
1.209291e-01 3.835443e-05
1.209340e-01 -1.509906e-03
1.209343e-01 -2.752376e-03
1.209405e-01 1.534062e-03
1.209420e-01 -7.166425e-04
1.209464e-01 9.136997e-03
1.209466e-01 3.644592e-03
1.209478e-01 2.673738e-03
1.209491e-01 -1.100605e-03
1.209695e-01 -1.507511e-05
1.209763e-01 3.511142e-03
1.209864e-01 5.478668e-04
1.209883e-01 -7.135353e-04
1.210140e-01 2.943151e-04
1.210176e-01 2.189970e-03
1.210364e-01 4.884031e-03
1.210382e-01 -9.219056e-05
1.210422e-01 4.668881e-03
1.210447e-01 -1.141074e-03
1.210530e-01 -1.491937e-03
1.210560e-01 -8.304190e-04
1.210570e-01 -5.181578e-04
1.210637e-01 -5.865028e-04
1.210645e-01 5.914469e-03
1.210699e-01 2.311533e-03
1.210707e-01 -1.099074e-03
1.210736e-01 7.352471e-04
1.210798e-01 -2.072365e-04
1.210845e-01 -1.181486e-03
1.210903e-01 3.207353e-03
1.210924e-01 9.684585e-04
1.211016e-01 -4.363412e-03
1.211043e-01 4.945713e-03
1.211132e-01 -3.004661e-03
1.211229e-01 2.076979e-03
1.211276e-01 -1.068377e-03
1.211307e-01 5.988331e-04
1.211336e-01 -2.020698e-03
1.211442e-01 -2.311644e-03
1.211452e-01 -2.481927e-03
1.211460e-01 -1.720594e-03
1.211465e-01 2.380317e-03
1.211576e-01 6.104413e-04
1.211590e-01 3.940358e-03
1.211632e-01 -2.192724e-03
1.211662e-01 8.262653e-04
1.211736e-01 1.430190e-03
1.211738e-01 -8.328277e-04
1.211772e-01 3.840961e-03
1.211777e-01 -1.076716e-03
1.211787e-01 -1.710856e-03
1.211792e-01 1.497163e-03
1.212098e-01 1.767601e-03
1.212162e-01 -1.287780e-03
1.212222e-01 3.856574e-04
1.212315e-01 1.030580e-03
1.212382e-01 -5.848068e-04
1.212401e-01 -1.031614e-03
1.212410e-01 -5.381275e-03
1.212514e-01 -2.373825e-03
1.212540e-01 1.302596e-03
1.212591e-01 5.269612e-04
1.212727e-01 4.770356e-04
1.212829e-01 1.579930e-03
1.212848e-01 4.915903e-03
1.212926e-01 4.637877e-03
1.213042e-01 -4.846147e-03
1.213044e-01 9.049853e-04
1.213162e-01 1.494365e-03
1.213203e-01 -1.327901e-03
1.213235e-01 1.342975e-03
1.213258e-01 4.490655e-03
1.213283e-01 -1.668269e-03
1.213286e-01 1.368548e-04
1.213359e-01 1.501216e-03
1.213378e-01 2.030681e-03
1.213441e-01 -3.507983e-04
1.213479e-01 7.539485e-03
1.213605e-01 -7.100129e-04
1.213642e-01 -1.066005e-03
1.213752e-01 -8.802699e-04
1.213793e-01 4.441024e-03
1.213805e-01 -1.247817e-04
1.213827e-01 -7.876167e-04
1.213903e-01 9.920118e-04
1.214049e-01 2.555424e-03
1.214070e-01 1.239038e-03
1.214201e-01 7.002446e-05
1.214213e-01 2.952438e-03
1.214407e-01 1.972928e-04
1.214422e-01 3.510728e-03
1.214446e-01 -1.358409e-03
1.214448e-01 6.768937e-03
1.214462e-01 -1.762120e-04
1.214463e-01 -3.603515e-04
1.214485e-01 8.610643e-03
1.214496e-01 -3.926239e-05
1.214546e-01 8.602952e-03
1.214605e-01 -1.886073e-03
1.214641e-01 -4.593976e-04
1.214761e-01 -1.423575e-03
1.215029e-01 3.263084e-03
1.215066e-01 -1.405305e-03
1.215109e-01 -1.707194e-04
1.215188e-01 9.782516e-04
1.215338e-01 1.542851e-04
1.215370e-01 1.257251e-04
1.215454e-01 2.154943e-04
1.215547e-01 -7.674466e-04
1.215605e-01 1.807067e-05
1.215617e-01 -1.804219e-03
1.215672e-01 1.981808e-03
1.215816e-01 1.146013e-03
1.215877e-01 2.736335e-03
1.215923e-01 1.010250e-03
1.215941e-01 2.174715e-04
1.215951e-01 7.477290e-04
1.215989e-01 -1.309342e-03
1.216104e-01 -1.197175e-03
1.216124e-01 8.651693e-05
1.216124e-01 8.651693e-05
1.216150e-01 -8.124391e-04
1.216153e-01 2.207956e-03
1.216201e-01 -1.285592e-03
1.216255e-01 -1.663576e-04
1.216293e-01 4.830088e-03
1.216298e-01 -1.876232e-03
1.216434e-01 1.099036e-03
1.216436e-01 8.148952e-04
1.216533e-01 -4.200347e-03
1.216544e-01 -2.626302e-03
1.216553e-01 1.538485e-03
1.216575e-01 9.817001e-04
1.216575e-01 9.817001e-04
1.216612e-01 3.725731e-03
1.216612e-01 3.725731e-03
1.216674e-01 8.340413e-05
1.216901e-01 4.311595e-03
1.217123e-01 -1.373528e-03
1.217187e-01 3.613457e-04
1.217208e-01 2.558411e-03
1.217295e-01 -1.563564e-03
1.217415e-01 2.766462e-03
1.217466e-01 -1.202341e-03
1.217466e-01 -2.597253e-03
1.217531e-01 -5.662094e-04
1.217548e-01 9.345445e-04
1.217581e-01 -3.659294e-03
1.217787e-01 -2.059533e-03
1.217787e-01 2.824896e-03
1.217794e-01 -8.152783e-04
1.217794e-01 -5.379642e-03
1.217853e-01 9.821424e-04
1.217854e-01 6.496647e-04
1.217991e-01 -5.678700e-03
1.218069e-01 3.082105e-03
1.218074e-01 1.029159e-03
1.218083e-01 -1.748637e-03
1.218102e-01 2.685166e-03
1.218116e-01 -1.590002e-03
1.218145e-01 4.403547e-04
1.218216e-01 4.589041e-03
1.218223e-01 -1.228524e-03
1.218273e-01 -5.611790e-03
1.218331e-01 -1.385691e-03
1.218377e-01 -8.586783e-05
1.218442e-01 1.044691e-03
1.218542e-01 -3.388577e-03
1.218643e-01 -1.565100e-03
1.218702e-01 1.346046e-03
1.218722e-01 3.067987e-03
1.218724e-01 3.306904e-03
1.218756e-01 9.980041e-04
1.218803e-01 3.432468e-03
1.218868e-01 -1.588432e-03
1.218886e-01 -3.113921e-03
1.218971e-01 2.143808e-04
1.218971e-01 1.431591e-03
1.219037e-01 -3.371588e-04
1.219044e-01 3.577709e-03
1.219138e-01 -7.486020e-04
1.219158e-01 2.990464e-04
1.219190e-01 -1.009066e-03
1.219277e-01 -1.151476e-03
1.219288e-01 -4.989688e-04
1.219304e-01 -3.952461e-05
1.219304e-01 -3.952461e-05
1.219335e-01 -1.491371e-03
1.219413e-01 -8.011557e-04
1.219426e-01 1.273661e-03
1.219514e-01 -6.154544e-03
1.219541e-01 -1.146324e-03
1.219745e-01 3.962845e-04
1.219802e-01 1.194352e-03
1.219864e-01 -4.072797e-04
1.219911e-01 -2.407022e-03
1.219934e-01 9.548613e-05
1.219992e-01 1.141575e-03
1.220080e-01 8.036947e-04
1.220111e-01 -3.017813e-03
1.220146e-01 3.138994e-04
1.220208e-01 -1.173323e-03
1.220230e-01 -2.446632e-03
1.220292e-01 1.584812e-03
1.220305e-01 1.094691e-03
1.220400e-01 9.483094e-04
1.220407e-01 -1.976751e-03
1.220497e-01 -1.855618e-03
1.220682e-01 -1.552741e-03
1.220713e-01 -1.646224e-03
1.220742e-01 -1.192942e-03
1.220944e-01 2.300012e-05
1.220982e-01 -5.883992e-05
1.220982e-01 9.565928e-04
1.221067e-01 1.251268e-03
1.221071e-01 -6.917856e-04
1.221073e-01 1.142430e-04
1.221084e-01 2.478477e-03
1.221089e-01 -8.424991e-04
1.221136e-01 -1.384406e-03
1.221146e-01 -2.068764e-03
1.221158e-01 4.164434e-03
1.221199e-01 2.236187e-03
1.221204e-01 1.738424e-03
1.221334e-01 -8.774189e-04
1.221351e-01 -1.174869e-03
1.221354e-01 -3.656146e-03
1.221360e-01 -1.150158e-04
1.221413e-01 2.033859e-04
1.221417e-01 -1.107796e-03
1.221437e-01 1.100249e-03
1.221560e-01 3.659188e-03
1.221579e-01 -2.955168e-04
1.221611e-01 -6.768200e-04
1.221686e-01 1.600788e-03
1.221706e-01 2.400349e-03
1.221770e-01 5.078568e-03
1.221770e-01 5.078568e-03
1.221775e-01 -1.232472e-03
1.221829e-01 7.047075e-04
1.221841e-01 -4.738645e-04
1.221919e-01 7.817343e-05
1.221953e-01 2.183787e-03
1.221964e-01 2.909734e-03
1.222032e-01 3.803548e-03
1.222032e-01 3.803548e-03
1.222112e-01 5.202956e-03
1.222140e-01 -2.587128e-03
1.222258e-01 -4.754018e-04
1.222438e-01 9.678993e-03
1.222620e-01 -2.018180e-03
1.222724e-01 9.192558e-04
1.222934e-01 4.485714e-05
1.222982e-01 2.143245e-03
1.222986e-01 -2.497598e-03
1.223022e-01 1.799208e-03
1.223137e-01 -1.686638e-03
1.223247e-01 -1.181251e-03
1.223293e-01 -1.471504e-03
1.223308e-01 1.365306e-04
1.223320e-01 9.111644e-04
1.223320e-01 9.111644e-04
1.223354e-01 7.214207e-05
1.223522e-01 -1.451130e-03
1.223578e-01 -5.321569e-03
1.223681e-01 1.135889e-03
1.223703e-01 -1.480701e-03
1.223790e-01 -2.487938e-03
1.223820e-01 -1.250771e-03
1.223830e-01 3.224634e-03
1.223912e-01 1.935431e-03
1.223969e-01 1.935775e-03
1.224086e-01 -1.224949e-03
1.224129e-01 2.710389e-04
1.224130e-01 -1.633664e-03
1.224189e-01 1.319582e-03
1.224212e-01 -1.459932e-03
1.224232e-01 -2.026844e-03
1.224278e-01 -2.098010e-03
1.224312e-01 2.271291e-03
1.224441e-01 -2.990770e-04
1.224510e-01 -1.967044e-04
1.224591e-01 7.610906e-04
1.224601e-01 -3.823128e-05
1.224632e-01 2.741284e-03
1.224647e-01 2.026272e-03
1.224687e-01 1.737054e-03
1.224741e-01 1.111788e-03
1.224820e-01 -2.534849e-03
1.224885e-01 -1.745245e-03
1.225005e-01 -1.041935e-03
1.225080e-01 5.367103e-03
1.225080e-01 5.367103e-03
1.225092e-01 -1.363484e-03
1.225141e-01 -1.398288e-03
1.225483e-01 1.026071e-03
1.225512e-01 -3.157679e-04
1.225635e-01 1.365338e-03
1.225677e-01 8.350879e-04
1.225724e-01 -7.334447e-04
1.225726e-01 -2.011951e-03
1.225729e-01 5.663286e-03
1.225862e-01 2.223228e-03
1.225893e-01 -1.638297e-03
1.226015e-01 1.597129e-05
1.226172e-01 1.751346e-03
1.226189e-01 2.854507e-03
1.226404e-01 7.513879e-06
1.226424e-01 -3.499514e-04
1.226503e-01 -1.403982e-03
1.226533e-01 1.539630e-03
1.226614e-01 -2.454310e-03
1.226789e-01 -2.689400e-03
1.226814e-01 -5.651316e-04
1.226819e-01 7.780269e-04
1.226861e-01 1.560934e-03
1.226869e-01 1.159094e-04
1.226913e-01 9.871519e-04
1.227045e-01 -2.184558e-03
1.227289e-01 -7.766037e-04
1.227293e-01 1.151961e-03
1.227306e-01 -2.070816e-03
1.227327e-01 8.615576e-04
1.227327e-01 8.615576e-04
1.227364e-01 -1.161017e-03
1.227432e-01 -3.204752e-04
1.227439e-01 1.481729e-03
1.227712e-01 1.211628e-03
1.227738e-01 -2.547920e-03
1.227802e-01 -1.166695e-03
1.227935e-01 -1.796434e-03
1.227940e-01 -3.266864e-03
1.228001e-01 2.731116e-04
1.228046e-01 2.863496e-03
1.228046e-01 2.863496e-03
1.228067e-01 -4.502894e-03
1.228099e-01 1.024792e-03
1.228205e-01 1.295834e-04
1.228217e-01 1.141204e-03
1.228414e-01 -3.294888e-03
1.228431e-01 1.724365e-03
1.228440e-01 1.565823e-04
1.228515e-01 -1.464483e-04
1.228551e-01 2.548857e-03
1.228625e-01 3.298210e-03
1.228686e-01 -1.493202e-03
1.228686e-01 -1.493202e-03
1.228734e-01 4.987864e-03
1.228831e-01 7.317670e-03
1.228974e-01 -1.468632e-03
1.228989e-01 3.235576e-03
1.228989e-01 3.235576e-03
1.229065e-01 1.314430e-03
1.229196e-01 -2.993754e-03
1.229420e-01 1.885678e-03
1.229433e-01 -1.026781e-03
1.229522e-01 -1.095572e-03
1.229558e-01 1.703030e-03
1.229599e-01 7.552360e-05
1.229620e-01 -2.013945e-03
1.229649e-01 2.810269e-03
1.229708e-01 1.081785e-03
1.229804e-01 -3.042895e-04
1.229861e-01 -1.052072e-04
1.229896e-01 -3.477476e-04
1.229997e-01 -9.230363e-04
1.230044e-01 1.244895e-03
1.230055e-01 1.731281e-03
1.230055e-01 1.731281e-03
1.230100e-01 1.228401e-03
1.230160e-01 2.001635e-03
1.230253e-01 2.998698e-05
1.230349e-01 1.803749e-03
1.230365e-01 2.889150e-04
1.230400e-01 8.390161e-04
1.230444e-01 3.623536e-04
1.230450e-01 -1.545620e-03
1.230540e-01 -1.030752e-03
1.230557e-01 2.642878e-03
1.230565e-01 1.935462e-03
1.230571e-01 1.039535e-03
1.230584e-01 -1.281838e-03
1.230664e-01 -1.394361e-03
1.230698e-01 -4.833053e-04
1.230699e-01 1.601730e-03
1.230702e-01 7.929475e-04
1.230709e-01 -9.941430e-04
1.230740e-01 2.780392e-03
1.230776e-01 -8.725973e-04
1.230892e-01 1.003015e-03
1.230935e-01 2.446197e-03
1.230944e-01 1.329565e-03
1.230989e-01 5.913374e-04
1.231138e-01 -6.964414e-04
1.231179e-01 -2.704233e-03
1.231230e-01 -6.336880e-04
1.231230e-01 -6.336880e-04
1.231233e-01 8.513456e-04
1.231352e-01 3.044490e-03
1.231365e-01 1.156235e-02
1.231460e-01 -1.320872e-03
1.231500e-01 -2.472703e-04
1.231519e-01 2.060523e-03
1.231653e-01 4.335783e-03
1.231708e-01 5.413842e-03
1.231791e-01 1.663398e-03
1.231834e-01 -1.287691e-03
1.231899e-01 2.512199e-04
1.231932e-01 -5.045692e-04
1.231968e-01 -1.955487e-03
1.232120e-01 3.295658e-03
1.232134e-01 -5.850107e-04
1.232212e-01 3.730311e-03
1.232234e-01 6.261004e-04
1.232322e-01 -9.974849e-04
1.232443e-01 1.377687e-03
1.232495e-01 -2.745794e-03
1.232545e-01 -4.714711e-03
1.232589e-01 2.241579e-03
1.232700e-01 3.020630e-04
1.232712e-01 7.017031e-03
1.232771e-01 -1.156261e-03
1.232781e-01 4.743915e-03
1.232789e-01 -4.921690e-03
1.232819e-01 2.269588e-03
1.232861e-01 -4.513872e-04
1.232869e-01 2.373571e-04
1.232987e-01 -6.134662e-05
1.233052e-01 1.147334e-03
1.233122e-01 -2.377285e-03
1.233287e-01 1.776151e-04
1.233338e-01 2.205273e-03
1.233341e-01 -1.219676e-03
1.233496e-01 -1.622593e-03
1.233580e-01 6.754214e-04
1.233681e-01 1.560441e-03
1.233702e-01 -2.164601e-04
1.233708e-01 3.322683e-03
1.233726e-01 -9.821722e-05
1.233747e-01 3.684543e-04
1.233759e-01 1.931007e-03
1.233793e-01 6.173023e-03
1.233940e-01 -2.334348e-03
1.234058e-01 2.936819e-03
1.234065e-01 -1.587307e-03
1.234065e-01 -1.587307e-03
1.234081e-01 -1.231983e-03
1.234117e-01 -2.865753e-03
1.234160e-01 -2.092974e-03
1.234177e-01 2.471074e-03
1.234207e-01 -1.288109e-03
1.234396e-01 -3.803280e-04
1.234430e-01 3.841638e-03
1.234443e-01 -6.096644e-04
1.234453e-01 2.216354e-03
1.234534e-01 -8.166078e-04
1.234564e-01 -1.282212e-03
1.234757e-01 1.619064e-03
1.234793e-01 2.834846e-03
1.234846e-01 5.575190e-04
1.234953e-01 -1.641735e-03
1.235089e-01 -2.578551e-03
1.235152e-01 8.620073e-05
1.235218e-01 -5.918499e-04
1.235290e-01 -3.248554e-04
1.235374e-01 -1.423319e-03
1.235391e-01 4.490043e-03
1.235424e-01 -1.450818e-03
1.235537e-01 -1.352230e-03
1.235543e-01 -2.518611e-03
1.235587e-01 9.956258e-03
1.235619e-01 1.371637e-03
1.235703e-01 1.052559e-03
1.235741e-01 6.684764e-03
1.235789e-01 -8.720974e-04
1.235820e-01 -3.611045e-03
1.235859e-01 -2.268684e-03
1.235984e-01 -1.157371e-03
1.236004e-01 2.643076e-03
1.236067e-01 -1.992848e-04
1.236147e-01 1.107806e-03
1.236232e-01 -1.623847e-03
1.236246e-01 1.385101e-03
1.236334e-01 -8.508992e-04
1.236355e-01 2.769857e-04
1.236385e-01 -1.921073e-03
1.236417e-01 -1.104360e-04
1.236426e-01 -4.341132e-04
1.236453e-01 1.339404e-03
1.236471e-01 -6.383215e-04
1.236495e-01 -9.544232e-04
1.236496e-01 6.151429e-04
1.236553e-01 3.743120e-04
1.236619e-01 -9.750263e-04
1.236621e-01 -2.655588e-03
1.236698e-01 -2.273678e-03
1.236769e-01 1.720272e-03
1.236843e-01 7.862318e-03
1.236858e-01 -9.387456e-04
1.236865e-01 5.935649e-03
1.236947e-01 5.936352e-03
1.236971e-01 -4.247563e-03
1.236971e-01 -4.247563e-03
1.236978e-01 8.903185e-04
1.236993e-01 4.905278e-03
1.237017e-01 -1.273169e-03
1.237121e-01 6.902912e-05
1.237245e-01 -9.445960e-04
1.237265e-01 -6.950381e-04
1.237268e-01 5.032556e-03
1.237287e-01 2.340862e-03
1.237300e-01 2.256481e-03
1.237378e-01 1.660279e-03
1.237383e-01 -9.665495e-04
1.237389e-01 9.086911e-04
1.237525e-01 4.578381e-03
1.237558e-01 6.469226e-04
1.237656e-01 -2.627325e-03
1.237656e-01 -2.627325e-03
1.237663e-01 -5.535367e-04
1.237667e-01 3.493299e-03
1.237717e-01 -6.530387e-04
1.237741e-01 -3.376037e-04
1.237887e-01 3.853183e-04
1.237939e-01 9.400443e-04
1.238014e-01 1.655941e-03
1.238141e-01 4.447096e-04
1.238170e-01 7.904567e-04
1.238257e-01 -1.067123e-03
1.238279e-01 -4.721438e-04
1.238291e-01 -1.254918e-03
1.238321e-01 -1.675468e-03
1.238391e-01 1.380609e-03
1.238403e-01 2.229134e-03
1.238430e-01 -1.669924e-03
1.238455e-01 -1.486058e-03
1.238464e-01 1.235569e-03
1.238464e-01 1.235569e-03
1.238502e-01 4.451809e-03
1.238532e-01 -1.065177e-03
1.238538e-01 -1.761321e-03
1.238614e-01 7.133979e-04
1.238743e-01 -1.689464e-03
1.238803e-01 -1.239991e-04
1.238820e-01 3.736017e-03
1.238820e-01 3.736017e-03
1.238914e-01 -1.439402e-04
1.238920e-01 1.480337e-03
1.239000e-01 2.106552e-03
1.239054e-01 2.295185e-04
1.239115e-01 1.030269e-03
1.239168e-01 3.145293e-04
1.239194e-01 1.782318e-03
1.239264e-01 -2.137969e-03
1.239421e-01 1.671896e-03
1.239520e-01 1.006253e-03
1.239522e-01 2.193124e-03
1.239528e-01 -2.734769e-04
1.239710e-01 3.473851e-04
1.239782e-01 -1.199621e-03
1.239840e-01 2.116469e-03
1.239920e-01 1.575299e-03
1.239933e-01 1.126001e-03
1.239944e-01 -1.108464e-03
1.240151e-01 -6.619264e-05
1.240270e-01 -1.145440e-03
1.240314e-01 -1.202129e-03
1.240331e-01 -4.214353e-04
1.240356e-01 3.296173e-03
1.240390e-01 -6.766124e-05
1.240412e-01 -1.481415e-04
1.240472e-01 -2.645781e-04
1.240519e-01 -1.042611e-03
1.240607e-01 -3.284739e-04
1.240751e-01 1.675311e-03
1.240899e-01 -9.823654e-04
1.240899e-01 -9.823654e-04
1.240919e-01 8.028606e-04
1.240934e-01 1.887716e-03
1.240974e-01 -6.952563e-04
1.241042e-01 -2.370673e-03
1.241043e-01 9.610259e-04
1.241043e-01 9.610259e-04
1.241110e-01 4.834586e-03
1.241180e-01 4.414134e-03
1.241282e-01 -1.058955e-03
1.241305e-01 9.563898e-05
1.241405e-01 5.484235e-04
1.241417e-01 4.253764e-03
1.241435e-01 -1.140461e-03
1.241444e-01 2.136192e-04
1.241494e-01 4.319866e-04
1.241504e-01 9.152104e-04
1.241685e-01 -1.796819e-03
1.241728e-01 5.217989e-03
1.241792e-01 4.690473e-04
1.241879e-01 -2.063633e-03
1.241921e-01 5.926745e-04
1.242013e-01 1.257961e-03
1.242028e-01 -2.952916e-03
1.242149e-01 -2.397695e-03
1.242167e-01 -7.604858e-05
1.242207e-01 1.695934e-03
1.242275e-01 -1.188805e-03
1.242290e-01 -6.462065e-04
1.242296e-01 2.812159e-03
1.242378e-01 2.344536e-04
1.242483e-01 1.125376e-03
1.242563e-01 1.418808e-03
1.242692e-01 -3.721628e-03
1.242800e-01 2.870386e-03
1.242815e-01 1.384990e-03
1.242828e-01 7.835269e-04
1.243053e-01 1.140883e-03
1.243154e-01 7.916100e-04
1.243263e-01 -7.516972e-04
1.243276e-01 -2.253070e-03
1.243326e-01 6.787466e-04
1.243330e-01 -1.823236e-03
1.243375e-01 3.729260e-04
1.243423e-01 6.254515e-03
1.243427e-01 1.423111e-04
1.243430e-01 5.821978e-04
1.243432e-01 2.370883e-03
1.243463e-01 2.511995e-03
1.243477e-01 1.297930e-03
1.243549e-01 6.320276e-03
1.243626e-01 1.679892e-03
1.243655e-01 1.637730e-03
1.243676e-01 6.624727e-04
1.243737e-01 4.698868e-03
1.243755e-01 6.929603e-04
1.243783e-01 -7.670238e-04
1.243946e-01 1.827933e-03
1.243995e-01 -6.429674e-05
1.244145e-01 -2.752691e-03
1.244389e-01 3.246506e-04
1.244454e-01 3.450109e-03
1.244475e-01 -3.484837e-04
1.244535e-01 1.075244e-03
1.244664e-01 3.231152e-03
1.244693e-01 5.449840e-04
1.244719e-01 2.334082e-03
1.244757e-01 -1.770796e-03
1.244834e-01 3.041009e-03
1.244883e-01 1.833346e-03
1.244896e-01 6.645727e-04
1.245219e-01 -2.336662e-03
1.245230e-01 3.232621e-03
1.245245e-01 1.204202e-03
1.245323e-01 4.664034e-04
1.245326e-01 -1.163806e-03
1.245375e-01 2.327256e-03
1.245399e-01 7.202691e-04
1.245512e-01 2.058421e-04
1.245512e-01 2.058421e-04
1.245554e-01 -1.687263e-03
1.245665e-01 6.537596e-04
1.245735e-01 5.315355e-03
1.245735e-01 5.315355e-03
1.245765e-01 1.938261e-04
1.245973e-01 -5.563075e-04
1.246014e-01 -2.044143e-04
1.246099e-01 3.283898e-03
1.246129e-01 -1.612898e-03
1.246215e-01 9.076756e-05
1.246216e-01 -3.195728e-03
1.246274e-01 -3.099680e-03
1.246399e-01 8.238372e-04
1.246530e-01 -1.809072e-03
1.246533e-01 -4.811162e-04
1.246579e-01 -1.416027e-03
1.246608e-01 3.258836e-04
1.246608e-01 3.258836e-04
1.246610e-01 -3.015821e-04
1.246616e-01 9.312938e-05
1.246669e-01 -1.214311e-03
1.246719e-01 9.776811e-04
1.246767e-01 -1.990083e-03
1.246897e-01 -7.093557e-04
1.246958e-01 4.104258e-04
1.246982e-01 -1.352451e-03
1.247026e-01 -1.934289e-03
1.247026e-01 -1.934289e-03
1.247172e-01 1.740116e-03
1.247183e-01 7.120246e-05
1.247192e-01 1.729453e-03
1.247246e-01 1.064994e-03
1.247305e-01 6.100539e-04
1.247317e-01 -3.684769e-03
1.247351e-01 -3.152235e-03
1.247444e-01 -1.532884e-03
1.247460e-01 -3.166795e-03
1.247467e-01 2.228791e-03
1.247475e-01 2.663066e-03
1.247618e-01 -1.828810e-03
1.247632e-01 -2.461339e-03
1.247668e-01 -1.177682e-03
1.247766e-01 -1.474172e-03
1.247795e-01 1.829583e-03
1.247834e-01 1.236696e-03
1.247834e-01 5.185482e-03
1.247973e-01 -2.102864e-03
1.248034e-01 5.754493e-04
1.248071e-01 -3.087751e-04
1.248122e-01 1.088563e-03
1.248171e-01 -7.298892e-05
1.248177e-01 -7.614446e-04
1.248344e-01 9.853055e-04
1.248350e-01 3.240954e-03
1.248352e-01 -9.377347e-04
1.248373e-01 -6.826618e-04
1.248391e-01 -2.603072e-03
1.248407e-01 -1.412027e-03
1.248523e-01 -9.959728e-04
1.248571e-01 1.728857e-03
1.248583e-01 3.894162e-04
1.248590e-01 2.446116e-03
1.248810e-01 6.480170e-04
1.248819e-01 2.525829e-03
1.248824e-01 -2.279370e-03
1.248844e-01 -6.895835e-04
1.248865e-01 -1.559244e-03
1.248911e-01 -1.872208e-03
1.249119e-01 -9.165245e-04
1.249223e-01 7.044979e-04
1.249239e-01 -1.340055e-03
1.249247e-01 2.762581e-03
1.249331e-01 1.467464e-03
1.249393e-01 5.253294e-03
1.249491e-01 -1.345671e-03
1.249506e-01 3.516813e-04
1.249506e-01 3.516813e-04
1.249556e-01 4.102798e-04
1.249587e-01 -2.160346e-03
1.249602e-01 -1.355973e-03
1.249655e-01 1.234109e-03
1.249671e-01 -4.235505e-03
1.249698e-01 -2.247032e-03
1.249748e-01 1.622463e-03
1.249776e-01 1.417055e-03
1.249786e-01 -9.753082e-04
1.249962e-01 -4.268023e-04
1.249969e-01 4.540793e-03
1.250051e-01 -1.306164e-03
1.250061e-01 1.633540e-03
1.250295e-01 3.836182e-03
1.250322e-01 -7.659088e-04
1.250354e-01 2.905598e-03
1.250398e-01 1.655381e-03
1.250413e-01 4.184202e-03
1.250457e-01 -2.011097e-03
1.250486e-01 -2.736655e-03
1.250534e-01 7.788103e-04
1.250635e-01 9.379403e-04
1.250652e-01 -2.623962e-04
1.250671e-01 1.711310e-04
1.250725e-01 -3.310295e-05
1.250761e-01 4.872450e-04
1.250829e-01 -7.332867e-04
1.250867e-01 4.244927e-04
1.251024e-01 1.026147e-03
1.251026e-01 3.279114e-04
1.251109e-01 3.475930e-03
1.251131e-01 -8.831640e-04
1.251156e-01 1.190807e-03
1.251227e-01 1.145473e-04
1.251374e-01 -2.211922e-03
1.251390e-01 2.678944e-03
1.251484e-01 1.555386e-03
1.251537e-01 5.559039e-04
1.251568e-01 2.523997e-03
1.251569e-01 2.554052e-03
1.251602e-01 3.462086e-03
1.251611e-01 4.523688e-04
1.251620e-01 -1.016001e-03
1.251710e-01 1.324584e-03
1.251850e-01 4.467257e-04
1.251876e-01 1.095252e-03
1.251975e-01 1.153527e-03
1.252015e-01 1.147406e-03
1.252028e-01 5.808396e-04
1.252050e-01 1.134994e-03
1.252192e-01 7.531508e-04
1.252342e-01 3.990206e-03
1.252411e-01 1.348903e-03
1.252523e-01 2.102775e-03
1.252552e-01 -1.487810e-03
1.252581e-01 -4.372671e-03
1.252636e-01 7.007861e-04
1.252660e-01 -3.683679e-03
1.252669e-01 2.019112e-03
1.252676e-01 -3.959313e-03
1.252765e-01 2.085228e-03
1.252815e-01 8.908565e-04
1.252901e-01 6.316188e-04
1.252960e-01 -3.163448e-03
1.252975e-01 1.411884e-03
1.253096e-01 5.391575e-04
1.253152e-01 8.468913e-04
1.253192e-01 1.719607e-03
1.253206e-01 -2.171588e-03
1.253223e-01 1.404313e-03
1.253248e-01 -1.096236e-03
1.253254e-01 -1.016189e-03
1.253269e-01 1.520493e-03
1.253286e-01 7.092482e-04
1.253286e-01 7.092482e-04
1.253464e-01 -1.584161e-03
1.253477e-01 4.319714e-04
1.253501e-01 1.437744e-03
1.253558e-01 9.084751e-04
1.253585e-01 -2.320459e-04
1.253594e-01 1.500467e-03
1.253649e-01 1.272079e-03
1.253678e-01 -8.660066e-04
1.253678e-01 -8.660066e-04
1.253778e-01 3.656974e-03
1.253823e-01 1.360434e-03
1.253829e-01 -8.434508e-05
1.253912e-01 5.473320e-03
1.253912e-01 5.473320e-03
1.253969e-01 1.681602e-03
1.253970e-01 1.742628e-03
1.254027e-01 1.231670e-03
1.254037e-01 1.574516e-03
1.254131e-01 1.708718e-03
1.254243e-01 -7.603452e-05
1.254266e-01 7.825117e-04
1.254305e-01 3.202551e-03
1.254305e-01 3.202551e-03
1.254313e-01 5.476342e-04
1.254586e-01 4.307320e-04
1.254602e-01 6.129622e-04
1.254618e-01 9.642591e-04
1.254700e-01 1.394653e-03
1.254755e-01 -7.706380e-04
1.254768e-01 2.002915e-03
1.254773e-01 7.071835e-04
1.254815e-01 -1.937530e-03
1.254827e-01 2.253007e-03
1.254991e-01 -4.198515e-03
1.255060e-01 1.655661e-03
1.255165e-01 -1.383417e-03
1.255196e-01 -2.995525e-04
1.255312e-01 7.408438e-04
1.255326e-01 2.757255e-04
1.255360e-01 2.010347e-04
1.255474e-01 6.181717e-03
1.255557e-01 2.194893e-03
1.255782e-01 4.023782e-03
1.255924e-01 4.500974e-03
1.255924e-01 4.500974e-03
1.255950e-01 -7.486393e-04
1.256051e-01 -7.047911e-04
1.256092e-01 -1.218190e-04
1.256109e-01 -2.052870e-03
1.256170e-01 6.292624e-04
1.256282e-01 -3.745567e-04
1.256327e-01 9.355818e-04
1.256343e-01 -7.337014e-04
1.256430e-01 8.112542e-04
1.256448e-01 3.285075e-04
1.256755e-01 -3.120044e-03
1.256851e-01 1.979496e-03
1.256862e-01 -3.428436e-03
1.256885e-01 1.782827e-03
1.256940e-01 2.461257e-03
1.256953e-01 -8.468174e-04
1.256972e-01 1.205636e-03
1.256992e-01 7.708464e-04
1.257123e-01 3.089607e-03
1.257145e-01 -3.301128e-03
1.257147e-01 -4.191315e-04
1.257208e-01 4.329689e-05
1.257226e-01 3.561466e-03
1.257226e-01 -1.048273e-03
1.257270e-01 -1.348601e-03
1.257367e-01 1.195807e-03
1.257589e-01 2.181457e-03
1.257682e-01 1.132486e-04
1.257740e-01 3.610132e-04
1.257800e-01 -5.559132e-04
1.257802e-01 1.520459e-03
1.257962e-01 3.426124e-03
1.258224e-01 5.137928e-04
1.258267e-01 -3.501840e-04
1.258370e-01 -6.416124e-04
1.258376e-01 8.232459e-04
1.258416e-01 5.009775e-03
1.258464e-01 1.453465e-03
1.258605e-01 2.365660e-03
1.258625e-01 -1.682829e-03
1.258741e-01 3.710960e-03
1.258768e-01 -6.520849e-04
1.258809e-01 -8.662161e-04
1.258853e-01 4.308741e-04
1.258957e-01 -7.313269e-04
1.258967e-01 -2.024448e-03
1.259147e-01 -1.548181e-03
1.259417e-01 5.638018e-04
1.259559e-01 -2.008100e-04
1.259588e-01 2.389696e-03
1.259661e-01 -1.457868e-03
1.259786e-01 -6.101057e-04
1.259842e-01 -1.198180e-03
1.259919e-01 -1.234228e-03
1.260122e-01 -8.727224e-04
1.260185e-01 -1.149573e-03
1.260188e-01 8.453130e-04
1.260225e-01 -1.649582e-03
1.260611e-01 2.198313e-05
1.260693e-01 2.698314e-03
1.260893e-01 3.246340e-04
1.261007e-01 -2.052443e-03
1.261083e-01 1.599019e-04
1.261146e-01 1.416641e-03
1.261391e-01 -1.095328e-03
1.261420e-01 -1.425262e-03
1.261471e-01 1.069839e-03
1.261489e-01 -1.834136e-03
1.261499e-01 -8.662681e-04
1.261500e-01 -2.227797e-04
1.261505e-01 2.362622e-03
1.261509e-01 6.064794e-04
1.261513e-01 9.167531e-04
1.261523e-01 1.755883e-03
1.261566e-01 2.414581e-03
1.261582e-01 4.232074e-03
1.261618e-01 9.549095e-04
1.261689e-01 -2.143754e-04
1.261752e-01 8.536706e-04
1.261862e-01 2.077805e-03
1.261962e-01 8.064789e-04
1.262039e-01 3.240395e-03
1.262060e-01 -1.022771e-03
1.262064e-01 -8.534735e-04
1.262091e-01 1.875491e-03
1.262097e-01 -1.352259e-03
1.262115e-01 -2.746035e-03
1.262145e-01 1.200655e-02
1.262359e-01 -9.366443e-04
1.262609e-01 1.196432e-03
1.262645e-01 3.307016e-04
1.262704e-01 6.411529e-04
1.262728e-01 7.742690e-05
1.262771e-01 1.033723e-03
1.262778e-01 3.921080e-03
1.262782e-01 -1.716597e-04
1.262813e-01 2.690856e-03
1.262815e-01 -2.653723e-03
1.262825e-01 5.689486e-04
1.262910e-01 -2.158267e-04
1.262960e-01 -1.038179e-04
1.262960e-01 -1.038179e-04
1.263078e-01 -2.629483e-03
1.263080e-01 -2.135313e-03
1.263090e-01 1.580507e-03
1.263111e-01 1.249787e-04
1.263143e-01 3.100907e-03
1.263346e-01 -9.173630e-04
1.263373e-01 4.448689e-03
1.263454e-01 3.752019e-04
1.263503e-01 -1.229068e-03
1.263634e-01 -2.005820e-04
1.263642e-01 -4.682593e-05
1.263673e-01 9.414557e-04
1.263792e-01 6.080747e-03
1.263986e-01 3.477796e-03
1.264055e-01 1.751210e-03
1.264079e-01 3.407687e-03
1.264127e-01 3.325891e-03
1.264140e-01 4.638933e-04
1.264226e-01 -7.482786e-03
1.264248e-01 5.263124e-04
1.264400e-01 9.700582e-04
1.264461e-01 3.821720e-04
1.264468e-01 4.086982e-03
1.264523e-01 2.136563e-03
1.264686e-01 -1.268506e-04
1.264703e-01 -9.022230e-04
1.264752e-01 5.326728e-04
1.264819e-01 3.915521e-03
1.264880e-01 -6.856442e-04
1.264903e-01 -2.652649e-03
1.264903e-01 3.381305e-03
1.264931e-01 3.834806e-04
1.264952e-01 1.637704e-03
1.264974e-01 1.892466e-03
1.264982e-01 -1.954085e-03
1.265068e-01 3.339281e-04
1.265082e-01 -1.853009e-03
1.265118e-01 -3.012980e-05
1.265121e-01 1.386970e-03
1.265156e-01 5.008109e-04
1.265338e-01 3.125144e-04
1.265487e-01 8.939059e-04
1.265516e-01 -7.947600e-04
1.265520e-01 9.003374e-04
1.265572e-01 -9.383376e-04
1.265596e-01 1.150632e-03
1.265598e-01 4.566332e-05
1.265643e-01 8.477326e-04
1.265658e-01 -2.032046e-04
1.265767e-01 5.580769e-04
1.265960e-01 8.160350e-04
1.265980e-01 9.092468e-04
1.265995e-01 1.145859e-03
1.266044e-01 4.922720e-03
1.266102e-01 8.416764e-05
1.266126e-01 7.274635e-04
1.266151e-01 1.357614e-03
1.266203e-01 -1.989418e-03
1.266266e-01 4.944514e-03
1.266312e-01 6.674518e-04
1.266320e-01 6.577008e-04
1.266434e-01 5.153095e-04
1.266575e-01 -3.236998e-03
1.266587e-01 5.943230e-04
1.266670e-01 2.062585e-03
1.267120e-01 -1.726653e-03
1.267218e-01 4.602860e-03
1.267262e-01 4.761764e-03
1.267324e-01 6.822838e-04
1.267393e-01 8.938625e-04
1.267455e-01 1.081819e-03
1.267480e-01 2.806852e-03
1.267525e-01 4.930585e-04
1.267530e-01 -1.974564e-03
1.267532e-01 1.590346e-04
1.267579e-01 -1.892192e-03
1.267640e-01 5.595101e-03
1.267714e-01 -2.071042e-03
1.267743e-01 -1.243799e-03
1.267752e-01 -1.336751e-03
1.267924e-01 -1.077487e-03
1.267964e-01 8.173646e-04
1.267964e-01 8.173646e-04
1.268010e-01 9.008344e-04
1.268037e-01 1.407447e-03
1.268042e-01 2.708428e-03
1.268062e-01 -2.246676e-03
1.268065e-01 -5.907076e-04
1.268105e-01 -4.495088e-04
1.268203e-01 -4.610154e-03
1.268209e-01 -1.483436e-03
1.268249e-01 -1.101748e-04
1.268295e-01 -9.315009e-04
1.268296e-01 -1.302749e-03
1.268297e-01 -3.042667e-03
1.268350e-01 1.475514e-03
1.268579e-01 -3.767548e-04
1.268582e-01 1.217672e-04
1.268608e-01 1.775037e-04
1.268623e-01 3.666835e-04
1.268732e-01 5.936193e-04
1.268865e-01 9.025406e-04
1.268966e-01 3.982600e-04
1.268981e-01 -6.831372e-04
1.268984e-01 -1.527115e-05
1.269003e-01 1.230682e-03
1.269044e-01 1.636191e-03
1.269072e-01 -1.075934e-03
1.269129e-01 1.144354e-03
1.269162e-01 3.685348e-03
1.269174e-01 -1.382959e-03
1.269231e-01 1.106141e-04
1.269231e-01 1.106141e-04
1.269275e-01 -3.211825e-03
1.269292e-01 -3.433756e-03
1.269421e-01 1.206557e-03
1.269461e-01 5.524258e-04
1.269530e-01 -5.728913e-04
1.269601e-01 -1.592130e-04
1.269729e-01 -1.502008e-03
1.269803e-01 1.196568e-03
1.269925e-01 1.553862e-03
1.269989e-01 1.521813e-03
1.270005e-01 -1.030005e-03
1.270272e-01 2.368222e-03
1.270277e-01 7.638891e-04
1.270309e-01 1.359443e-03
1.270339e-01 -5.743112e-04
1.270410e-01 -2.118990e-03
1.270412e-01 -9.536585e-04
1.270499e-01 7.749223e-04
1.270562e-01 -1.535076e-03
1.270747e-01 -2.187089e-03
1.270749e-01 -4.149078e-04
1.270755e-01 -1.386468e-03
1.270791e-01 1.636783e-03
1.270833e-01 9.471798e-04
1.270892e-01 7.243351e-04
1.270904e-01 -1.999145e-03
1.270951e-01 1.592399e-03
1.271050e-01 6.469248e-03
1.271059e-01 -5.395677e-03
1.271086e-01 7.364320e-04
1.271101e-01 1.806965e-03
1.271101e-01 1.806965e-03
1.271175e-01 -2.731614e-03
1.271182e-01 -7.529317e-04
1.271240e-01 9.575403e-04
1.271240e-01 2.287755e-03
1.271260e-01 1.289092e-04
1.271318e-01 -1.081413e-03
1.271363e-01 -1.039200e-03
1.271509e-01 4.949658e-04
1.271517e-01 1.590168e-02
1.271550e-01 -6.962656e-04
1.271641e-01 5.405182e-04
1.271772e-01 1.663601e-03
1.271866e-01 2.967637e-03
1.271983e-01 -1.147733e-03
1.272033e-01 1.049431e-03
1.272056e-01 -1.067027e-03
1.272099e-01 1.114493e-03
1.272112e-01 1.839796e-03
1.272133e-01 4.138371e-04
1.272303e-01 -2.994761e-03
1.272305e-01 -6.875784e-04
1.272365e-01 -2.084864e-03
1.272496e-01 1.030503e-04
1.272579e-01 -2.507308e-03
1.272621e-01 8.905424e-04
1.272662e-01 9.392868e-05
1.272729e-01 4.394185e-04
1.272773e-01 1.969649e-03
1.272784e-01 8.498447e-04
1.272789e-01 2.894674e-04
1.272824e-01 2.837006e-03
1.272852e-01 3.671007e-04
1.272922e-01 -4.310658e-03
1.272939e-01 1.344936e-03
1.272964e-01 -1.488361e-03
1.272978e-01 3.530746e-04
1.273023e-01 -2.117237e-03
1.273150e-01 -1.984721e-03
1.273190e-01 -3.476669e-03
1.273253e-01 4.880258e-03
1.273299e-01 -4.320479e-04
1.273452e-01 -2.901374e-04
1.273544e-01 -1.670905e-03
1.273544e-01 -1.670905e-03
1.273557e-01 1.069732e-03
1.273705e-01 -1.210342e-03
1.273805e-01 2.758740e-03
1.273829e-01 2.385884e-03
1.273857e-01 -7.998304e-04
1.273919e-01 -1.689035e-03
1.273926e-01 -1.758437e-03
1.274008e-01 -1.489063e-03
1.274123e-01 -8.086501e-04
1.274129e-01 1.183326e-03
1.274159e-01 1.189847e-03
1.274231e-01 1.176731e-03
1.274259e-01 4.338411e-03
1.274439e-01 5.943036e-04
1.274455e-01 3.767389e-03
1.274501e-01 -1.223558e-03
1.274513e-01 4.562415e-03
1.274533e-01 1.779238e-04
1.274563e-01 2.567677e-03
1.274586e-01 4.582111e-03
1.274623e-01 -9.715857e-04
1.274632e-01 1.514741e-03
1.274708e-01 -2.182516e-03
1.274900e-01 4.908444e-03
1.275028e-01 -3.720940e-04
1.275042e-01 1.939443e-03
1.275302e-01 7.544083e-04
1.275516e-01 -1.490923e-03
1.275554e-01 -1.555160e-03
1.275573e-01 -2.463050e-03
1.275575e-01 -5.366325e-04
1.275622e-01 -2.376218e-04
1.275627e-01 -1.638396e-03
1.275656e-01 1.720708e-04
1.275671e-01 1.323519e-03
1.275694e-01 -8.002829e-04
1.275754e-01 1.739724e-03
1.275784e-01 -1.084848e-03
1.275871e-01 -8.554232e-04
1.276003e-01 -1.492286e-03
1.276005e-01 -1.268439e-03
1.276014e-01 -1.197608e-03
1.276067e-01 6.053195e-04
1.276145e-01 -4.391310e-04
1.276165e-01 1.252463e-03
1.276394e-01 1.832838e-03
1.276426e-01 -8.320252e-04
1.276470e-01 -1.299397e-03
1.276500e-01 1.862777e-03
1.276552e-01 -4.895615e-04
1.276559e-01 2.642772e-03
1.276563e-01 -4.777998e-04
1.276599e-01 2.892135e-03
1.276604e-01 -1.335773e-03
1.276671e-01 4.390120e-03
1.276720e-01 -1.053878e-03
1.276746e-01 -1.514376e-03
1.276754e-01 -1.853435e-03
1.276779e-01 1.461073e-03
1.276854e-01 9.195005e-04
1.276905e-01 -4.847747e-05
1.276911e-01 2.962279e-03
1.276993e-01 -3.822374e-04
1.277003e-01 3.335697e-04
1.277078e-01 -6.363501e-04
1.277078e-01 4.601803e-03
1.277141e-01 -9.718921e-04
1.277145e-01 3.480439e-03
1.277419e-01 3.148926e-03
1.277466e-01 -8.209150e-05
1.277535e-01 -1.605475e-03
1.277725e-01 -2.521322e-03
1.277750e-01 -1.763809e-03
1.277773e-01 -1.134419e-03
1.277833e-01 -1.822325e-03
1.277849e-01 -3.324838e-03
1.277909e-01 4.601180e-04
1.277910e-01 1.048681e-03
1.277941e-01 2.999525e-03
1.278034e-01 -1.774077e-03
1.278093e-01 1.337252e-03
1.278132e-01 -1.319700e-03
1.278162e-01 6.417492e-04
1.278197e-01 -1.766176e-03
1.278337e-01 1.298149e-03
1.278349e-01 5.232368e-03
1.278404e-01 2.383803e-03
1.278535e-01 -1.220560e-03
1.278536e-01 4.025308e-03
1.278570e-01 -1.123950e-03
1.278583e-01 -1.869642e-04
1.278642e-01 -1.390791e-04
1.278725e-01 1.197357e-03
1.279035e-01 4.532039e-03
1.279124e-01 -3.726062e-03
1.279232e-01 -3.090368e-03
1.279271e-01 1.425760e-03
1.279353e-01 1.318268e-03
1.279398e-01 -5.309067e-04
1.279426e-01 4.055951e-03
1.279428e-01 4.313323e-03
1.279495e-01 -1.848649e-03
1.279530e-01 6.964570e-04
1.279572e-01 -1.065975e-03
1.279598e-01 2.580286e-03
1.279754e-01 5.732565e-04
1.279892e-01 6.266719e-04
1.279946e-01 -1.982736e-03
1.280007e-01 -3.634475e-03
1.280044e-01 -9.688663e-04
1.280079e-01 -1.754660e-03
1.280089e-01 1.154164e-04
1.280111e-01 3.392355e-03
1.280222e-01 1.501259e-03
1.280326e-01 -5.740731e-04
1.280361e-01 1.478570e-03
1.280415e-01 -1.441556e-03
1.280426e-01 4.033902e-03
1.280509e-01 -4.579129e-04
1.280619e-01 -1.079096e-03
1.280655e-01 -1.426804e-03
1.280677e-01 -1.517512e-03
1.280686e-01 5.306400e-04
1.280691e-01 6.217367e-04
1.280701e-01 -1.178378e-03
1.280701e-01 -1.178378e-03
1.280711e-01 -1.318676e-03
1.280743e-01 7.052449e-04
1.280788e-01 -4.816708e-04
1.280825e-01 3.280325e-04
1.280844e-01 5.886103e-03
1.280863e-01 2.425025e-03
1.280918e-01 1.385566e-03
1.281048e-01 7.265589e-04
1.281079e-01 1.382940e-03
1.281088e-01 -4.469920e-04
1.281134e-01 6.005708e-04
1.281231e-01 -2.188817e-03
1.281238e-01 -1.230243e-03
1.281240e-01 1.247932e-04
1.281285e-01 -4.785608e-04
1.281316e-01 -1.458377e-03
1.281448e-01 -3.649127e-03
1.281602e-01 -1.406182e-03
1.281602e-01 -1.406182e-03
1.281604e-01 -6.321344e-05
1.281616e-01 -3.946410e-03
1.281929e-01 3.763027e-03
1.281963e-01 1.787731e-04
1.281978e-01 -1.486432e-03
1.282011e-01 3.384370e-03
1.282129e-01 1.859708e-05
1.282289e-01 1.464549e-03
1.282333e-01 1.766349e-03
1.282348e-01 6.908492e-03
1.282376e-01 2.117591e-03
1.282380e-01 1.961191e-03
1.282472e-01 1.600362e-04
1.282494e-01 5.030795e-04
1.282549e-01 -1.919197e-03
1.282634e-01 -1.283492e-03
1.282636e-01 1.241802e-03
1.282641e-01 -1.332381e-03
1.282735e-01 9.185203e-04
1.282881e-01 -1.170824e-04
1.282966e-01 -2.220553e-03
1.283036e-01 1.037473e-03
1.283061e-01 -8.966831e-04
1.283091e-01 7.512503e-04
1.283110e-01 -3.363703e-04
1.283120e-01 4.133401e-04
1.283137e-01 1.853856e-03
1.283181e-01 6.282267e-04
1.283297e-01 2.299225e-03
1.283298e-01 -1.614069e-04
1.283334e-01 -2.774153e-03
1.283461e-01 -1.395571e-04
1.283534e-01 4.310411e-04
1.283622e-01 5.210090e-03
1.283644e-01 4.083337e-03
1.283649e-01 2.207892e-04
1.283737e-01 1.345075e-03
1.283945e-01 -1.089565e-03
1.283976e-01 1.836318e-03
1.284046e-01 -1.557676e-04
1.284081e-01 1.299551e-03
1.284141e-01 2.378610e-03
1.284243e-01 5.349581e-04
1.284255e-01 2.450146e-03
1.284271e-01 -1.347161e-03
1.284321e-01 -3.138106e-06
1.284322e-01 -1.652539e-03
1.284371e-01 2.236422e-03
1.284451e-01 -2.812600e-03
1.284458e-01 7.889045e-04
1.284476e-01 -5.944382e-04
1.284507e-01 1.966118e-03
1.284547e-01 1.696377e-04
1.284588e-01 9.882727e-04
1.284660e-01 -2.919303e-03
1.284719e-01 -2.310280e-03
1.284729e-01 8.143279e-04
1.284812e-01 6.186981e-04
1.284942e-01 2.527354e-03
1.284985e-01 2.634901e-03
1.285062e-01 1.919609e-03
1.285070e-01 2.892840e-03
1.285118e-01 -1.059808e-03
1.285130e-01 5.806105e-04
1.285175e-01 1.190857e-03
1.285418e-01 1.945286e-04
1.285550e-01 8.150267e-03
1.285553e-01 2.193241e-03
1.285627e-01 1.291738e-03
1.285774e-01 -1.587744e-04
1.285813e-01 1.813629e-03
1.285840e-01 8.100904e-05
1.285857e-01 1.332687e-03
1.285889e-01 5.977701e-03
1.285926e-01 -2.155078e-03
1.285976e-01 -6.919985e-04
1.286004e-01 -5.714597e-03
1.286049e-01 3.081370e-03
1.286063e-01 1.219496e-03
1.286129e-01 1.695553e-03
1.286300e-01 1.212006e-03
1.286300e-01 1.212006e-03
1.286317e-01 -2.333461e-03
1.286365e-01 8.785741e-04
1.286376e-01 -8.524036e-06
1.286382e-01 -1.268594e-03
1.286397e-01 -3.101508e-03
1.286460e-01 2.871196e-03
1.286489e-01 3.090142e-03
1.286538e-01 1.200685e-03
1.286560e-01 -3.905904e-03
1.286570e-01 -1.728441e-03
1.286824e-01 -6.191134e-04
1.286824e-01 -6.191134e-04
1.287051e-01 -1.813261e-03
1.287114e-01 2.008841e-04
1.287370e-01 4.414600e-04
1.287370e-01 6.933095e-04
1.287424e-01 -3.144569e-04
1.287427e-01 -2.829545e-03
1.287501e-01 -6.517844e-04
1.287516e-01 -1.750985e-03
1.287527e-01 -1.477203e-04
1.287613e-01 2.122560e-03
1.287676e-01 3.920698e-04
1.287709e-01 8.745825e-04
1.287763e-01 1.917811e-04
1.287799e-01 1.846010e-03
1.287821e-01 1.074538e-03
1.287878e-01 -1.406921e-03
1.288225e-01 3.754565e-05
1.288227e-01 -8.548665e-04
1.288307e-01 -2.402041e-03
1.288409e-01 -4.195210e-03
1.288436e-01 5.817161e-03
1.288555e-01 -3.100217e-03
1.288622e-01 1.870620e-03
1.288679e-01 -8.486160e-04
1.288712e-01 1.689384e-03
1.288832e-01 -1.497843e-03
1.288923e-01 1.278148e-04
1.288930e-01 -1.074600e-03
1.288973e-01 1.006145e-03
1.289015e-01 5.709406e-04
1.289020e-01 9.695836e-04
1.289185e-01 1.557806e-03
1.289266e-01 1.450530e-04
1.289276e-01 3.384780e-03
1.289295e-01 -1.535727e-03
1.289315e-01 7.633926e-04
1.289340e-01 -6.003955e-04
1.289352e-01 1.911190e-03
1.289428e-01 -1.427647e-03
1.289443e-01 1.795702e-03
1.289799e-01 -6.578965e-04
1.289881e-01 2.300075e-03
1.289940e-01 -5.109286e-04
1.290002e-01 2.565981e-03
1.290157e-01 9.054282e-05
1.290168e-01 7.435354e-04
1.290364e-01 -3.247436e-04
1.290504e-01 3.402401e-05
1.290534e-01 2.289264e-03
1.290550e-01 -2.014487e-03
1.290580e-01 -9.550566e-04
1.290602e-01 1.072363e-03
1.290632e-01 -5.099505e-03
1.290652e-01 4.265614e-04
1.290685e-01 -3.254173e-04
1.290714e-01 -1.699234e-03
1.290795e-01 1.186174e-03
1.290906e-01 1.618628e-03
1.290909e-01 -5.637934e-04
1.290938e-01 1.376747e-04
1.290944e-01 -8.301304e-04
1.290956e-01 -1.657775e-04
1.290973e-01 -2.030819e-03
1.291007e-01 -9.588804e-05
1.291131e-01 -1.174408e-03
1.291150e-01 6.466905e-04
1.291171e-01 7.389297e-04
1.291297e-01 1.837426e-03
1.291300e-01 1.140955e-03
1.291339e-01 -1.293135e-03
1.291485e-01 6.737163e-04
1.291508e-01 -1.548093e-03
1.291528e-01 8.374810e-04
1.291585e-01 -1.470727e-04
1.291585e-01 2.046318e-04
1.291602e-01 1.163316e-04
1.291610e-01 1.092295e-03
1.291636e-01 7.602967e-04
1.291665e-01 -2.570911e-03
1.291712e-01 -3.152123e-04
1.291760e-01 1.584559e-04
1.291776e-01 -5.906894e-04
1.291780e-01 -6.792785e-04
1.291788e-01 1.367628e-03
1.291840e-01 1.415460e-03
1.291890e-01 -7.889265e-04
1.291903e-01 -8.804009e-04
1.291972e-01 -8.837824e-04
1.291997e-01 -1.636208e-03
1.292024e-01 -1.627039e-05
1.292029e-01 2.892705e-04
1.292094e-01 -2.774682e-03
1.292141e-01 5.217346e-03
1.292141e-01 5.217346e-03
1.292157e-01 -3.755028e-03
1.292240e-01 -3.318933e-04
1.292343e-01 -3.834921e-04
1.292381e-01 1.212165e-03
1.292423e-01 -8.775311e-04
1.292495e-01 -1.650390e-03
1.292581e-01 1.079101e-03
1.292586e-01 1.418975e-03
1.292604e-01 -1.054296e-03
1.292661e-01 -5.483689e-03
1.292678e-01 -1.533878e-03
1.292678e-01 1.407732e-03
1.292697e-01 -1.191591e-03
1.292725e-01 -3.402996e-03
1.292731e-01 -4.329608e-04
1.292853e-01 5.317539e-03
1.292863e-01 -2.218469e-03
1.292941e-01 -9.375945e-04
1.293012e-01 8.686145e-04
1.293018e-01 -4.113623e-03
1.293087e-01 5.151492e-04
1.293098e-01 1.060924e-03
1.293204e-01 2.560902e-04
1.293217e-01 -1.209018e-03
1.293372e-01 1.170201e-03
1.293421e-01 -1.988543e-03
1.293499e-01 1.689330e-04
1.293506e-01 1.126072e-03
1.293560e-01 1.832538e-03
1.293560e-01 -1.674745e-03
1.293613e-01 -3.265267e-03
1.293661e-01 -1.401874e-03
1.293661e-01 -1.401874e-03
1.293711e-01 4.433735e-06
1.293727e-01 5.745010e-04
1.293821e-01 -7.799386e-04
1.293860e-01 -5.545893e-03
1.293880e-01 3.842330e-03
1.293967e-01 1.757280e-03
1.294047e-01 4.279083e-03
1.294102e-01 1.185833e-03
1.294129e-01 -8.197186e-04
1.294130e-01 -7.642977e-04
1.294261e-01 8.235894e-04
1.294358e-01 9.225502e-03
1.294407e-01 8.351124e-04
1.294491e-01 2.357172e-03
1.294491e-01 4.804572e-03
1.294514e-01 -1.418405e-03
1.294557e-01 7.820534e-03
1.294626e-01 -9.049508e-04
1.294724e-01 2.017796e-03
1.294844e-01 -1.231391e-03
1.294938e-01 1.926967e-03
1.294949e-01 1.708125e-03
1.294983e-01 -1.290272e-03
1.295019e-01 3.338982e-03
1.295122e-01 9.308763e-04
1.295159e-01 4.240316e-04
1.295165e-01 2.599097e-03
1.295200e-01 3.995854e-05
1.295227e-01 -3.152653e-04
1.295290e-01 -1.122708e-03
1.295292e-01 -3.080799e-04
1.295362e-01 1.269811e-03
1.295431e-01 2.717044e-04
1.295467e-01 -5.995543e-03
1.295714e-01 -6.367090e-05
1.295752e-01 -2.765734e-04
1.295763e-01 8.722806e-03
1.295810e-01 2.510211e-03
1.295893e-01 -1.333454e-03
1.296049e-01 1.222082e-03
1.296052e-01 -2.519086e-03
1.296053e-01 -9.091935e-04
1.296053e-01 -9.091935e-04
1.296147e-01 -1.976486e-03
1.296212e-01 8.951466e-04
1.296227e-01 5.525389e-04
1.296232e-01 -5.941517e-04
1.296289e-01 -1.411750e-04
1.296318e-01 8.897181e-04
1.296388e-01 -1.193865e-03
1.296403e-01 -5.900161e-03
1.296470e-01 9.234419e-04
1.296598e-01 1.171792e-04
1.296619e-01 -3.751864e-03
1.296628e-01 -4.888338e-04
1.296696e-01 -4.337391e-04
1.296795e-01 -7.011877e-04
1.296807e-01 -3.986331e-04
1.296851e-01 6.329376e-05
1.297093e-01 7.549438e-04
1.297266e-01 1.440454e-03
1.297295e-01 -1.139040e-03
1.297309e-01 3.440720e-04
1.297316e-01 -4.300708e-05
1.297379e-01 -6.512053e-04
1.297514e-01 2.296102e-03
1.297642e-01 2.006369e-04
1.297737e-01 1.034780e-03
1.297831e-01 9.927352e-04
1.297868e-01 -3.238997e-04
1.298016e-01 -1.907622e-03
1.298045e-01 -1.429352e-03
1.298047e-01 1.636092e-03
1.298057e-01 -1.671329e-03
1.298063e-01 4.344305e-03
1.298085e-01 1.132817e-03
1.298100e-01 -2.075779e-03
1.298169e-01 1.011877e-03
1.298265e-01 -1.225650e-03
1.298320e-01 -1.650261e-03
1.298340e-01 3.418591e-03
1.298464e-01 2.103007e-04
1.298593e-01 -2.716285e-03
1.298677e-01 1.287035e-03
1.298722e-01 -4.712399e-04
1.298725e-01 3.576474e-03
1.298758e-01 4.656956e-04
1.298796e-01 -1.077936e-03
1.298814e-01 -1.047386e-03
1.299005e-01 2.173705e-03
1.299201e-01 -1.694786e-03
1.299348e-01 4.593318e-03
1.299373e-01 3.666312e-04
1.299523e-01 -3.046866e-04
1.299595e-01 3.625253e-03
1.299718e-01 -3.185310e-03
1.299757e-01 8.543713e-04
1.299828e-01 4.080515e-04
1.299835e-01 -2.964730e-03
1.299845e-01 1.534257e-03
1.299882e-01 5.708633e-04
1.299889e-01 2.891710e-03
1.299929e-01 2.444118e-03
1.299964e-01 -1.928628e-03
1.299970e-01 1.238302e-03
1.300082e-01 -1.748393e-03
1.300140e-01 2.390220e-03
1.300250e-01 4.577529e-03
1.300269e-01 1.008578e-03
1.300275e-01 7.402108e-03
1.300291e-01 4.962709e-03
1.300304e-01 -2.563952e-03
1.300359e-01 4.746676e-03
1.300385e-01 5.680766e-03
1.300445e-01 -3.480579e-03
1.300463e-01 2.208210e-03
1.300528e-01 -8.604487e-04
1.300732e-01 7.888124e-04
1.300750e-01 -3.974971e-04
1.300783e-01 -2.985477e-03
1.300789e-01 -1.111842e-04
1.300886e-01 -1.667054e-03
1.300893e-01 1.850740e-03
1.300966e-01 1.366064e-03
1.300984e-01 6.178643e-03
1.301009e-01 4.961937e-04
1.301028e-01 1.470026e-03
1.301029e-01 1.385038e-03
1.301036e-01 -2.483275e-03
1.301036e-01 -2.483275e-03
1.301059e-01 -4.212870e-03
1.301063e-01 1.373714e-03
1.301184e-01 6.109121e-04
1.301184e-01 6.109121e-04
1.301207e-01 -1.381256e-03
1.301207e-01 -1.381256e-03
1.301219e-01 9.497441e-04
1.301416e-01 -7.197369e-04
1.301526e-01 -1.871719e-03
1.301585e-01 -4.620242e-03
1.301599e-01 4.058573e-03
1.301601e-01 -4.893313e-04
1.301609e-01 1.033849e-04
1.301656e-01 5.346329e-04
1.301721e-01 -3.937328e-04
1.301792e-01 4.200960e-03
1.301807e-01 -2.503689e-03
1.301875e-01 1.009313e-03
1.301875e-01 1.009313e-03
1.301900e-01 -2.029005e-03
1.301983e-01 1.896741e-03
1.302123e-01 -1.537739e-03
1.302151e-01 9.498916e-03
1.302200e-01 -1.595638e-03
1.302461e-01 4.135983e-04
1.302466e-01 -7.022018e-04
1.302477e-01 -2.754005e-03
1.302513e-01 -3.697794e-04
1.302575e-01 8.760109e-04
1.302659e-01 -1.102205e-03
1.302659e-01 -1.102205e-03
1.302670e-01 7.068832e-04
1.302692e-01 2.681742e-03
1.303121e-01 5.761817e-03
1.303131e-01 -1.134745e-03
1.303198e-01 -1.031874e-03
1.303198e-01 -1.031874e-03
1.303230e-01 -5.350136e-04
1.303322e-01 -4.170058e-03
1.303332e-01 -8.952393e-04
1.303354e-01 -4.765749e-03
1.303399e-01 -1.031297e-03
1.303469e-01 6.799665e-03
1.303632e-01 -1.561290e-03
1.303694e-01 -2.659068e-03
1.303835e-01 -7.357233e-05
1.303966e-01 -1.230225e-03
1.303998e-01 1.716435e-03
1.304023e-01 -9.211706e-04
1.304083e-01 7.082702e-04
1.304122e-01 1.016370e-03
1.304122e-01 1.016370e-03
1.304261e-01 -3.697736e-04
1.304274e-01 5.300687e-03
1.304283e-01 -1.695322e-03
1.304300e-01 1.845329e-03
1.304345e-01 1.781836e-03
1.304455e-01 2.127442e-03
1.304489e-01 2.810603e-03
1.304533e-01 1.082949e-03
1.304565e-01 -2.798879e-03
1.304655e-01 -2.791984e-03
1.304718e-01 2.066201e-03
1.304827e-01 1.946041e-03
1.304844e-01 5.013503e-03
1.304896e-01 -1.371085e-05
1.304927e-01 -1.155654e-03
1.304971e-01 -2.075628e-03
1.304978e-01 -1.276284e-03
1.305013e-01 1.195590e-03
1.305023e-01 6.069582e-04
1.305134e-01 1.047364e-03
1.305311e-01 4.204272e-03
1.305398e-01 7.514498e-04
1.305449e-01 6.349590e-03
1.305486e-01 1.136586e-03
1.305575e-01 -1.115921e-03
1.305623e-01 -2.002620e-03
1.305632e-01 8.725437e-04
1.305712e-01 6.764390e-04
1.305818e-01 1.816469e-03
1.305831e-01 2.665889e-03
1.305861e-01 7.001944e-04
1.305866e-01 4.796041e-04
1.305940e-01 1.163948e-03
1.305984e-01 -3.062540e-03
1.306131e-01 1.794387e-03
1.306159e-01 -1.498917e-03
1.306160e-01 -2.160083e-03
1.306241e-01 -1.622813e-03
1.306311e-01 1.387980e-03
1.306347e-01 3.108922e-03
1.306349e-01 2.957136e-03
1.306375e-01 5.742246e-04
1.306510e-01 -5.501066e-04
1.306727e-01 -1.479747e-03
1.306737e-01 -1.424425e-03
1.306775e-01 3.185386e-03
1.306884e-01 2.585708e-03
1.306904e-01 9.632335e-04
1.306956e-01 -7.258564e-04
1.306979e-01 2.206588e-03
1.307226e-01 -1.629997e-03
1.307230e-01 1.299185e-03
1.307301e-01 -1.443879e-03
1.307313e-01 -4.322935e-03
1.307348e-01 2.251168e-03
1.307561e-01 1.969999e-04
1.307648e-01 -1.539268e-03
1.307669e-01 9.440987e-04
1.307689e-01 -1.095945e-03
1.307722e-01 -4.620339e-04
1.307771e-01 2.329369e-03
1.307843e-01 3.986680e-04
1.307863e-01 9.983063e-05
1.307894e-01 -8.350322e-04
1.307957e-01 -1.267786e-03
1.307961e-01 -2.015049e-04
1.307985e-01 -2.019259e-03
1.308095e-01 6.418454e-04
1.308123e-01 -2.195758e-03
1.308149e-01 1.219454e-03
1.308284e-01 5.740797e-04
1.308287e-01 1.999757e-03
1.308289e-01 4.664808e-03
1.308308e-01 1.668690e-03
1.308347e-01 3.053160e-03
1.308421e-01 -1.475087e-03
1.308565e-01 5.687505e-03
1.308607e-01 2.030465e-03
1.308607e-01 2.030465e-03
1.308609e-01 2.789963e-03
1.308649e-01 5.471215e-04
1.308717e-01 -5.800283e-04
1.308733e-01 -1.368853e-03
1.308788e-01 2.662970e-03
1.308824e-01 3.506260e-03
1.308848e-01 -5.115608e-04
1.308860e-01 3.996486e-03
1.308871e-01 8.008704e-04
1.309094e-01 1.252001e-03
1.309129e-01 -1.730533e-03
1.309180e-01 -2.112470e-03
1.309199e-01 5.152086e-04
1.309267e-01 -3.917366e-04
1.309417e-01 3.596306e-04
1.309456e-01 2.637114e-03
1.309488e-01 1.503804e-03
1.309492e-01 -1.065855e-03
1.309506e-01 -2.123569e-03
1.309562e-01 -1.553222e-03
1.309563e-01 -8.970170e-04
1.309590e-01 -9.475131e-04
1.309590e-01 -9.475131e-04
1.309787e-01 7.069467e-04
1.309808e-01 4.446615e-03
1.309822e-01 1.013476e-03
1.309869e-01 6.511927e-04
1.309876e-01 1.329517e-03
1.309898e-01 -1.225513e-03
1.309908e-01 1.062443e-03
1.309926e-01 -7.380332e-04
1.309944e-01 -2.428239e-03
1.309978e-01 -1.386570e-03
1.310116e-01 1.349944e-03
1.310161e-01 5.637508e-04
1.310219e-01 -1.772378e-03
1.310250e-01 7.509384e-04
1.310303e-01 2.035493e-03
1.310605e-01 -6.423596e-04
1.310721e-01 2.494925e-03
1.310829e-01 -1.108763e-03
1.310840e-01 6.824023e-04
1.310861e-01 -9.649898e-04
1.311063e-01 4.233759e-03
1.311073e-01 -2.402716e-03
1.311130e-01 9.885233e-04
1.311193e-01 8.509401e-04
1.311262e-01 3.092524e-03
1.311316e-01 3.470414e-03
1.311486e-01 1.849998e-03
1.311532e-01 2.768655e-03
1.311532e-01 2.768655e-03
1.311750e-01 2.390638e-03
1.311779e-01 -7.325656e-04
1.311818e-01 -1.410921e-03
1.311892e-01 -1.551592e-03
1.311941e-01 1.328653e-03
1.311962e-01 -1.589274e-03
1.311977e-01 3.052718e-05
1.312030e-01 2.933807e-03
1.312137e-01 1.147115e-03
1.312248e-01 1.183517e-04
1.312279e-01 1.251718e-03
1.312327e-01 -4.780791e-04
1.312345e-01 -3.603907e-03
1.312420e-01 -2.647819e-03
1.312420e-01 -2.647819e-03
1.312567e-01 2.695097e-03
1.312701e-01 1.530642e-03
1.312722e-01 1.911868e-03
1.312766e-01 -1.330679e-03
1.312821e-01 -2.768310e-03
1.312905e-01 -1.319338e-03
1.312917e-01 3.223298e-03
1.312962e-01 3.115720e-04
1.312969e-01 -5.132176e-04
1.313038e-01 3.302189e-03
1.313038e-01 3.302189e-03
1.313051e-01 6.735572e-03
1.313174e-01 -3.191757e-03
1.313207e-01 -9.203904e-04
1.313208e-01 -1.410514e-03
1.313257e-01 -5.813259e-04
1.313306e-01 -8.398297e-05
1.313307e-01 -1.924866e-03
1.313451e-01 7.450918e-03
1.313486e-01 3.072005e-03
1.313527e-01 -5.277005e-04
1.313544e-01 1.101903e-03
1.313565e-01 3.079846e-04
1.313608e-01 -1.277012e-03
1.313622e-01 -2.239435e-04
1.313622e-01 1.588762e-03
1.313665e-01 -1.845643e-03
1.313684e-01 2.879408e-03
1.313855e-01 -4.226667e-04
1.313869e-01 -5.499042e-04
1.313919e-01 7.386299e-05
1.313985e-01 4.392054e-03
1.313987e-01 1.385114e-03
1.314068e-01 -2.280828e-03
1.314212e-01 -1.484862e-03
1.314222e-01 -1.021964e-03
1.314222e-01 -1.021964e-03
1.314224e-01 -1.396522e-04
1.314439e-01 4.768363e-03
1.314497e-01 -1.892985e-03
1.314541e-01 -2.017890e-04
1.314578e-01 4.731898e-03
1.314637e-01 4.827259e-04
1.314650e-01 -9.611911e-04
1.314703e-01 -1.083626e-04
1.314722e-01 -1.423950e-03
1.314751e-01 1.392592e-04
1.314799e-01 -9.750742e-04
1.314819e-01 1.768673e-04
1.314949e-01 2.071331e-03
1.315051e-01 2.515381e-03
1.315224e-01 3.732308e-03
1.315239e-01 -2.196254e-04
1.315258e-01 2.893348e-03
1.315321e-01 -1.333040e-03
1.315447e-01 1.500012e-03
1.315523e-01 -8.140293e-04
1.315536e-01 6.659057e-03
1.315572e-01 2.091782e-03
1.315592e-01 2.721840e-03
1.315656e-01 9.411662e-04
1.315658e-01 -2.815788e-03
1.315764e-01 1.783147e-03
1.315769e-01 -1.498268e-03
1.315808e-01 1.315981e-03
1.316101e-01 -8.159392e-04
1.316130e-01 3.987697e-03
1.316356e-01 -1.274736e-03
1.316370e-01 6.834566e-04
1.316383e-01 -1.044579e-04
1.316482e-01 1.825434e-04
1.316610e-01 -3.699266e-06
1.316661e-01 3.114808e-04
1.316712e-01 -1.528842e-03
1.316909e-01 1.674694e-03
1.316909e-01 1.674694e-03
1.316920e-01 -3.436514e-04
1.316971e-01 -2.771285e-04
1.317005e-01 2.744916e-03
1.317005e-01 2.744916e-03
1.317071e-01 -1.305832e-03
1.317117e-01 -2.012804e-03
1.317158e-01 2.592709e-03
1.317168e-01 3.085598e-04
1.317194e-01 1.998012e-03
1.317219e-01 -1.241558e-03
1.317233e-01 5.537143e-04
1.317239e-01 -1.344799e-03
1.317310e-01 -1.499965e-03
1.317323e-01 2.036496e-03
1.317389e-01 -6.199077e-04
1.317434e-01 2.615550e-03
1.317701e-01 -4.155211e-04
1.317915e-01 -1.697543e-03
1.317944e-01 3.354696e-03
1.317959e-01 -2.024069e-03
1.318253e-01 -1.657949e-03
1.318253e-01 -1.657949e-03
1.318357e-01 2.113563e-03
1.318364e-01 6.690509e-04
1.318451e-01 -1.107091e-03
1.318455e-01 2.623496e-03
1.318515e-01 8.397447e-04
1.318550e-01 3.483736e-03
1.318556e-01 -4.284717e-03
1.318583e-01 -7.521364e-05
1.318616e-01 1.433405e-03
1.318650e-01 4.070761e-03
1.318697e-01 -6.964537e-04
1.318722e-01 -9.371749e-04
1.318797e-01 3.316059e-03
1.318824e-01 -7.438496e-05
1.318824e-01 -7.438496e-05
1.318826e-01 -1.121218e-03
1.318838e-01 3.127725e-03
1.318842e-01 5.451375e-04
1.318853e-01 1.511969e-03
1.318930e-01 -3.515413e-03
1.318934e-01 -7.969310e-04
1.318997e-01 -2.096130e-03
1.319037e-01 2.578881e-03
1.319090e-01 1.239218e-03
1.319094e-01 9.758863e-04
1.319164e-01 -2.251555e-04
1.319242e-01 1.447426e-03
1.319339e-01 2.765425e-03
1.319339e-01 -6.630114e-04
1.319552e-01 8.168680e-04
1.319573e-01 -2.168672e-03
1.319687e-01 4.177092e-03
1.319729e-01 -1.908975e-03
1.319874e-01 -2.200420e-04
1.320000e-01 -1.156800e-03
1.320099e-01 1.497705e-03
1.320114e-01 -1.023088e-03
1.320118e-01 -5.175500e-04
1.320227e-01 -1.185915e-03
1.320232e-01 1.085803e-03
1.320272e-01 1.563206e-03
1.320343e-01 2.923850e-03
1.320398e-01 -1.240844e-03
1.320449e-01 1.079219e-03
1.320453e-01 1.642633e-03
1.320471e-01 8.849488e-04
1.320499e-01 -2.903766e-03
1.320617e-01 1.338602e-03
1.320668e-01 4.770318e-04
1.320669e-01 -2.081214e-03
1.320765e-01 1.792644e-03
1.320834e-01 -2.980610e-03
1.320935e-01 -3.275324e-03
1.320939e-01 -8.268564e-04
1.321054e-01 -2.134898e-04
1.321106e-01 -8.265300e-04
1.321133e-01 3.678241e-04
1.321141e-01 2.752590e-03
1.321242e-01 -8.531366e-04
1.321382e-01 -2.403125e-03
1.321386e-01 7.258114e-04
1.321394e-01 3.169526e-04
1.321424e-01 1.545642e-03
1.321431e-01 -4.293847e-04
1.321437e-01 2.195274e-03
1.321466e-01 -1.061536e-03
1.321535e-01 -3.387800e-04
1.321565e-01 -4.020140e-04
1.321612e-01 1.630891e-03
1.321623e-01 -9.168073e-05
1.321644e-01 -2.458239e-03
1.321691e-01 -1.003943e-02
1.321708e-01 5.007341e-05
1.321716e-01 -1.856050e-03
1.321729e-01 1.308914e-03
1.321735e-01 -6.774905e-04
1.321739e-01 -2.423621e-03
1.321827e-01 2.066376e-03
1.321831e-01 -1.053017e-03
1.321895e-01 -8.302955e-04
1.321934e-01 1.879475e-03
1.321957e-01 2.528059e-03
1.321959e-01 -2.333263e-03
1.322077e-01 -2.259807e-04
1.322170e-01 3.347165e-04
1.322178e-01 -1.157306e-03
1.322196e-01 -4.833111e-04
1.322291e-01 4.063025e-03
1.322291e-01 4.063025e-03
1.322323e-01 -2.480930e-03
1.322362e-01 4.070767e-03
1.322490e-01 -1.072182e-03
1.322502e-01 -1.839424e-03
1.322623e-01 7.442762e-04
1.322649e-01 2.025781e-03
1.322649e-01 2.025781e-03
1.322661e-01 5.666252e-03
1.322763e-01 3.473566e-04
1.322781e-01 -7.179618e-04
1.322814e-01 3.693858e-03
1.322984e-01 2.351817e-03
1.323075e-01 -7.631501e-04
1.323151e-01 -9.049568e-04
1.323167e-01 -3.411992e-03
1.323193e-01 -2.077969e-03
1.323193e-01 5.815226e-04
1.323257e-01 -1.735678e-03
1.323313e-01 -1.446403e-03
1.323324e-01 3.998809e-04
1.323336e-01 2.723432e-03
1.323391e-01 -3.139510e-03
1.323437e-01 6.846999e-04
1.323460e-01 1.002085e-03
1.323483e-01 9.818409e-04
1.323523e-01 -2.550364e-03
1.323574e-01 2.550077e-04
1.323642e-01 2.794047e-03
1.323708e-01 -1.364237e-04
1.323757e-01 2.357068e-03
1.323784e-01 -2.232798e-04
1.323810e-01 9.957507e-04
1.323812e-01 1.167504e-03
1.323873e-01 -1.680493e-03
1.324109e-01 5.983710e-03
1.324132e-01 -1.188668e-03
1.324167e-01 -5.934613e-04
1.324168e-01 2.113163e-03
1.324232e-01 5.033448e-03
1.324295e-01 -4.807893e-04
1.324320e-01 -8.910700e-04
1.324324e-01 -4.668384e-05
1.324410e-01 -2.116184e-03
1.324433e-01 -7.153792e-04
1.324459e-01 1.326764e-03
1.324542e-01 2.489617e-03
1.324595e-01 5.060815e-03
1.324769e-01 -4.030887e-04
1.324938e-01 -1.884021e-03
1.324938e-01 -1.884021e-03
1.324992e-01 -4.320565e-04
1.325077e-01 -2.522353e-03
1.325158e-01 1.328592e-03
1.325238e-01 5.953023e-03
1.325284e-01 -5.018901e-03
1.325308e-01 2.692497e-03
1.325351e-01 -1.927831e-03
1.325370e-01 3.706540e-03
1.325411e-01 1.109497e-03
1.325479e-01 2.094410e-03
1.325515e-01 -1.497380e-03
1.325545e-01 2.455350e-03
1.325655e-01 -2.039214e-04
1.325726e-01 4.823263e-03
1.325752e-01 -3.700363e-04
1.325779e-01 -9.354457e-06
1.325786e-01 7.807161e-05
1.325830e-01 1.578993e-03
1.325888e-01 -1.388073e-04
1.325893e-01 8.210307e-04
1.325905e-01 1.289860e-03
1.325907e-01 -2.461935e-03
1.325915e-01 -7.517402e-04
1.325962e-01 4.236489e-03
1.325980e-01 -3.324124e-04
1.325985e-01 -2.184741e-03
1.326000e-01 9.868829e-04
1.326022e-01 -9.715236e-04
1.326054e-01 -7.367673e-04
1.326071e-01 -5.761644e-04
1.326075e-01 -6.891594e-04
1.326348e-01 5.150623e-04
1.326365e-01 -1.142895e-03
1.326365e-01 -3.887557e-05
1.326386e-01 -1.017039e-04
1.326393e-01 1.497154e-03
1.326444e-01 -1.651900e-03
1.326484e-01 -8.706579e-04
1.326654e-01 -9.992665e-06
1.326657e-01 2.969509e-03
1.326751e-01 -1.629108e-03
1.326765e-01 -3.894749e-04
1.326896e-01 4.533900e-03
1.327043e-01 2.122164e-03
1.327045e-01 8.794633e-04
1.327161e-01 6.421484e-04
1.327162e-01 5.679525e-04
1.327273e-01 -4.462508e-04
1.327341e-01 -1.459424e-03
1.327468e-01 1.006284e-03
1.327526e-01 -9.934623e-04
1.327713e-01 1.652529e-03
1.327840e-01 -9.535675e-04
1.327854e-01 3.877919e-03
1.327871e-01 1.262193e-03
1.327963e-01 2.821178e-03
1.327972e-01 1.620031e-03
1.328037e-01 1.053565e-03
1.328048e-01 -2.351750e-04
1.328088e-01 1.252331e-03
1.328106e-01 3.382496e-03
1.328136e-01 -1.389153e-03
1.328157e-01 1.341544e-03
1.328296e-01 -1.817833e-03
1.328345e-01 2.667564e-04
1.328439e-01 -4.751127e-04
1.328535e-01 1.746737e-03
1.328542e-01 1.736406e-03
1.328666e-01 1.906055e-03
1.328681e-01 -4.125636e-04
1.328795e-01 -2.751757e-03
1.328803e-01 2.757528e-03
1.328926e-01 1.607585e-03
1.328958e-01 7.780642e-04
1.328973e-01 5.436474e-03
1.328987e-01 2.967534e-04
1.329000e-01 -5.258170e-05
1.329042e-01 4.675759e-03
1.329085e-01 -1.038669e-03
1.329087e-01 5.275131e-04
1.329105e-01 -1.805906e-04
1.329173e-01 6.935432e-04
1.329336e-01 -6.941059e-04
1.329380e-01 -2.440755e-04
1.329405e-01 3.151806e-03
1.329426e-01 -3.693344e-04
1.329484e-01 3.464003e-03
1.329534e-01 9.330433e-04
1.329576e-01 -1.514557e-03
1.329636e-01 -8.476532e-06
1.329683e-01 4.021004e-04
1.329689e-01 -8.827092e-04
1.329744e-01 -2.064381e-03
1.329780e-01 9.135368e-04
1.329805e-01 8.441984e-04
1.329874e-01 3.519986e-03
1.329882e-01 9.576721e-04
1.330001e-01 -1.463392e-03
1.330015e-01 -2.285443e-03
1.330046e-01 -6.436259e-04
1.330071e-01 2.562835e-03
1.330096e-01 3.861063e-03
1.330105e-01 7.461065e-04
1.330111e-01 6.282540e-03
1.330119e-01 2.612289e-03
1.330183e-01 -1.947364e-04
1.330208e-01 -4.167271e-03
1.330220e-01 1.668706e-03
1.330223e-01 -4.076232e-03
1.330344e-01 9.137190e-04
1.330377e-01 -2.172193e-03
1.330382e-01 2.935898e-03
1.330384e-01 1.259634e-03
1.330447e-01 1.594977e-03
1.330485e-01 1.789225e-03
1.330506e-01 -1.974830e-03
1.330583e-01 2.032223e-03
1.330583e-01 -4.409945e-04
1.330659e-01 -1.426508e-03
1.330659e-01 -1.426508e-03
1.330764e-01 6.436422e-04
1.330790e-01 3.613273e-04
1.330803e-01 4.598478e-03
1.330809e-01 -1.266994e-03
1.330833e-01 3.413983e-03
1.330883e-01 8.086272e-04
1.330950e-01 1.473536e-03
1.330979e-01 2.458360e-03
1.331024e-01 2.399304e-03
1.331030e-01 -5.335766e-03
1.331089e-01 -3.501835e-03
1.331113e-01 5.947237e-03
1.331129e-01 -2.794064e-03
1.331157e-01 3.621115e-03
1.331177e-01 2.860719e-03
1.331182e-01 5.167003e-04
1.331198e-01 3.970726e-04
1.331211e-01 2.740508e-03
1.331260e-01 -9.701233e-04
1.331282e-01 5.341363e-04
1.331305e-01 -4.345596e-03
1.331335e-01 1.575955e-03
1.331365e-01 -7.817874e-04
1.331375e-01 -3.226882e-03
1.331434e-01 7.340512e-04
1.331584e-01 -7.763914e-04
1.331608e-01 1.238061e-03
1.331616e-01 1.375703e-03
1.331671e-01 -9.482658e-04
1.331749e-01 2.281617e-03
1.331757e-01 -1.025739e-04
1.331798e-01 -1.418524e-03
1.331808e-01 1.428864e-03
1.331872e-01 2.270107e-03
1.331888e-01 1.543563e-03
1.331892e-01 -1.821912e-03
1.331892e-01 -2.962056e-03
1.331911e-01 3.915185e-04
1.331939e-01 5.078902e-03
1.332127e-01 2.129662e-04
1.332195e-01 3.034082e-03
1.332348e-01 -1.527025e-03
1.332351e-01 2.043439e-03
1.332352e-01 3.113935e-03
1.332401e-01 6.059747e-04
1.332564e-01 2.002497e-04
1.332599e-01 2.408294e-03
1.332680e-01 -1.191171e-03
1.332703e-01 1.001447e-03
1.332711e-01 -8.760329e-04
1.332722e-01 -1.638886e-03
1.332748e-01 1.444644e-03
1.332765e-01 5.158964e-03
1.332772e-01 -1.619340e-03
1.332857e-01 2.545523e-04
1.332898e-01 3.279951e-03
1.333077e-01 2.386969e-04
1.333125e-01 2.042254e-03
1.333141e-01 -8.324363e-04
1.333177e-01 2.428283e-03
1.333200e-01 4.747808e-03
1.333316e-01 -3.377431e-04
1.333334e-01 7.252702e-04
1.333371e-01 2.104637e-03
1.333398e-01 3.938642e-03
1.333446e-01 3.751371e-03
1.333461e-01 -8.466404e-04
1.333553e-01 1.855275e-03
1.333553e-01 1.716173e-03
1.333576e-01 -5.398230e-04
1.333579e-01 1.749922e-03
1.333601e-01 -3.697458e-03
1.333689e-01 -7.767547e-04
1.333696e-01 7.044270e-03
1.333696e-01 7.044270e-03
1.333778e-01 1.927801e-04
1.333790e-01 -7.256472e-04
1.333792e-01 4.017739e-03
1.333793e-01 -1.796333e-04
1.333820e-01 -3.919398e-04
1.333862e-01 1.228620e-03
1.334022e-01 -7.586284e-05
1.334081e-01 4.868380e-03
1.334093e-01 1.712479e-05
1.334276e-01 -2.345436e-03
1.334284e-01 9.226774e-04
1.334425e-01 7.678343e-04
1.334427e-01 -1.449568e-04
1.334493e-01 1.033061e-03
1.334580e-01 4.232510e-04
1.334628e-01 1.648468e-03
1.334696e-01 1.315221e-03
1.334707e-01 7.485995e-03
1.334709e-01 4.409219e-03
1.334802e-01 5.464239e-03
1.334860e-01 2.389472e-03
1.334916e-01 -7.031252e-04
1.334937e-01 -6.785142e-04
1.334966e-01 -1.812648e-03
1.335021e-01 -2.615021e-03
1.335047e-01 1.124168e-03
1.335060e-01 5.058177e-03
1.335138e-01 7.225155e-04
1.335147e-01 2.729004e-03
1.335192e-01 2.603844e-03
1.335308e-01 -4.338082e-04
1.335326e-01 -9.660662e-04
1.335405e-01 -3.022367e-04
1.335406e-01 -2.908117e-03
1.335406e-01 -2.908117e-03
1.335437e-01 2.126640e-03
1.335468e-01 1.521804e-03
1.335483e-01 1.326222e-04
1.335487e-01 9.745615e-04
1.335602e-01 3.743341e-03
1.335744e-01 1.000981e-03
1.335806e-01 -2.903326e-03
1.335848e-01 2.849257e-04
1.335914e-01 -1.439538e-03
1.335930e-01 -2.936028e-03
1.335939e-01 1.498627e-03
1.335974e-01 1.446151e-04
1.335978e-01 1.703723e-03
1.336020e-01 7.200001e-04
1.336036e-01 6.248444e-04
1.336091e-01 -3.200521e-04
1.336132e-01 2.753813e-03
1.336250e-01 2.732194e-03
1.336266e-01 9.350636e-04
1.336296e-01 -1.732138e-03
1.336338e-01 -1.460592e-03
1.336379e-01 -2.374793e-03
1.336383e-01 -2.683208e-03
1.336384e-01 1.697901e-03
1.336384e-01 1.406671e-03
1.336400e-01 -4.203738e-04
1.336416e-01 -2.451773e-04
1.336416e-01 -2.451773e-04
1.336420e-01 -1.705489e-04
1.336453e-01 7.497316e-04
1.336483e-01 7.457948e-04
1.336486e-01 -1.555953e-03
1.336500e-01 -2.101682e-03
1.336627e-01 -1.507536e-03
1.336643e-01 3.818564e-04
1.336656e-01 -1.054071e-04
1.336673e-01 2.345138e-03
1.336694e-01 1.049313e-04
1.336816e-01 3.877026e-03
1.336845e-01 8.652020e-04
1.336855e-01 -8.330106e-04
1.336891e-01 -3.625837e-03
1.336901e-01 -2.082395e-03
1.336944e-01 1.255820e-05
1.336990e-01 -1.683763e-04
1.337039e-01 -1.595743e-03
1.337059e-01 3.713177e-04
1.337078e-01 3.216033e-03
1.337110e-01 -1.583522e-03
1.337150e-01 2.015906e-03
1.337211e-01 -1.631900e-03
1.337252e-01 6.769858e-04
1.337255e-01 1.167171e-03
1.337289e-01 5.183974e-03
1.337342e-01 -6.273550e-04
1.337400e-01 3.270698e-03
1.337418e-01 2.400482e-03
1.337432e-01 -2.490104e-03
1.337605e-01 -1.758720e-04
1.337808e-01 6.073573e-04
1.337848e-01 -9.499678e-04
1.337953e-01 7.832448e-04
1.337964e-01 2.623928e-03
1.338149e-01 -1.912703e-03
1.338185e-01 -1.835371e-04
1.338354e-01 3.930194e-03
1.338398e-01 -3.097192e-03
1.338421e-01 1.234503e-03
1.338478e-01 6.580013e-04
1.338521e-01 -1.199083e-03
1.338631e-01 4.454844e-03
1.338644e-01 1.571426e-03
1.338644e-01 2.107722e-03
1.338712e-01 -1.297871e-03
1.338724e-01 -1.558336e-03
1.338736e-01 3.783652e-05
1.338772e-01 -1.852121e-03
1.338852e-01 3.279728e-04
1.338868e-01 4.759059e-03
1.338926e-01 -7.042603e-04
1.339055e-01 2.126164e-03
1.339132e-01 3.439168e-03
1.339167e-01 -3.686405e-03
1.339173e-01 1.038288e-03
1.339259e-01 6.570325e-04
1.339405e-01 -3.849753e-03
1.339410e-01 4.912390e-03
1.339435e-01 2.507456e-04
1.339507e-01 5.587899e-03
1.339521e-01 -3.735263e-03
1.339544e-01 -2.938481e-03
1.339668e-01 -1.256798e-03
1.339703e-01 -2.612681e-03
1.339704e-01 -1.336028e-03
1.339785e-01 -2.531179e-03
1.339819e-01 2.438296e-04
1.339834e-01 1.312218e-03
1.339835e-01 1.680793e-04
1.339887e-01 3.669848e-04
1.340090e-01 1.363505e-03
1.340090e-01 1.211604e-03
1.340100e-01 -1.216091e-03
1.340100e-01 -1.216091e-03
1.340183e-01 3.422800e-03
1.340241e-01 1.486225e-04
1.340371e-01 -2.000152e-03
1.340396e-01 6.926742e-04
1.340602e-01 2.880609e-03
1.340679e-01 -2.178172e-03
1.340687e-01 1.591337e-03
1.340743e-01 1.012527e-03
1.340797e-01 -2.099627e-03
1.340849e-01 1.303495e-03
1.340872e-01 -2.369791e-05
1.340894e-01 1.706598e-03
1.340960e-01 2.089678e-04
1.341033e-01 -2.863144e-03
1.341038e-01 1.416565e-03
1.341096e-01 3.898746e-03
1.341124e-01 3.959758e-03
1.341185e-01 1.380692e-04
1.341202e-01 -1.408759e-03
1.341215e-01 2.868290e-03
1.341426e-01 3.283781e-03
1.341439e-01 1.266083e-03
1.341439e-01 1.266083e-03
1.341447e-01 2.752829e-04
1.341544e-01 7.499290e-04
1.341565e-01 -2.236779e-03
1.341707e-01 -4.017309e-04
1.341740e-01 5.676647e-05
1.341852e-01 -4.098434e-04
1.341856e-01 3.590655e-03
1.341861e-01 -2.937889e-03
1.341985e-01 4.452244e-04
1.342015e-01 1.597239e-03
1.342016e-01 -3.480589e-03
1.342021e-01 -1.184424e-03
1.342055e-01 1.469185e-03
1.342157e-01 -1.930160e-03
1.342230e-01 3.359294e-03
1.342246e-01 -1.989892e-03
1.342262e-01 6.735102e-04
1.342390e-01 2.305016e-03
1.342390e-01 2.305016e-03
1.342394e-01 -1.292429e-03
1.342421e-01 8.648864e-04
1.342462e-01 -1.463032e-03
1.342537e-01 -8.717370e-04
1.342581e-01 8.283169e-04
1.342587e-01 1.055918e-03
1.342595e-01 -4.102173e-04
1.342601e-01 5.610165e-04
1.342647e-01 2.045585e-03
1.342647e-01 2.045585e-03
1.342662e-01 3.604154e-03
1.342751e-01 3.571076e-03
1.342772e-01 -7.584917e-05
1.342777e-01 1.404315e-03
1.342888e-01 4.742844e-03
1.342942e-01 3.263973e-04
1.342946e-01 -1.907620e-03
1.342999e-01 1.849777e-03
1.343016e-01 1.258885e-04
1.343094e-01 -2.566677e-04
1.343150e-01 1.500809e-03
1.343280e-01 4.956112e-03
1.343307e-01 -1.249507e-04
1.343307e-01 -1.249507e-04
1.343322e-01 2.299869e-03
1.343333e-01 2.554375e-04
1.343404e-01 3.685861e-03
1.343461e-01 1.781979e-03
1.343568e-01 1.334911e-03
1.343579e-01 -8.492696e-04
1.343669e-01 -1.430114e-03
1.343838e-01 5.134026e-04
1.343862e-01 -1.454698e-03
1.343919e-01 -2.861734e-03
1.344128e-01 9.168243e-05
1.344145e-01 6.003414e-03
1.344217e-01 1.816933e-03
1.344296e-01 -8.068177e-04
1.344296e-01 -5.337707e-04
1.344573e-01 1.447549e-03
1.344705e-01 -1.228378e-03
1.344736e-01 -5.332529e-04
1.344992e-01 1.281608e-03
1.345008e-01 3.512064e-04
1.345024e-01 -8.321566e-04
1.345101e-01 8.924431e-04
1.345320e-01 1.611983e-03
1.345374e-01 -1.333701e-03
1.345386e-01 4.482106e-03
1.345428e-01 1.436995e-03
1.345444e-01 1.928092e-03
1.345609e-01 1.600980e-03
1.345793e-01 -2.370993e-03
1.345830e-01 -1.547815e-03
1.345843e-01 -2.296202e-03
1.345875e-01 4.988899e-04
1.345939e-01 1.252274e-03
1.345944e-01 -4.276025e-03
1.346164e-01 4.522397e-03
1.346180e-01 -4.090613e-03
1.346219e-01 -2.580753e-03
1.346230e-01 -1.536722e-03
1.346270e-01 -1.222627e-03
1.346272e-01 -1.937788e-03
1.346276e-01 -6.520337e-04
1.346305e-01 -4.569011e-06
1.346350e-01 -1.788350e-04
1.346385e-01 -1.586581e-03
1.346385e-01 -1.586581e-03
1.346445e-01 1.366589e-04
1.346569e-01 1.920711e-03
1.346618e-01 -1.367412e-03
1.346635e-01 -6.355360e-04
1.346651e-01 7.294834e-05
1.346728e-01 -2.611072e-03
1.346881e-01 -1.687322e-03
1.346913e-01 1.297843e-03
1.346956e-01 -1.676200e-04
1.346986e-01 -1.319373e-03
1.346987e-01 4.906790e-03
1.347061e-01 1.911583e-04
1.347062e-01 3.831450e-03
1.347062e-01 3.831450e-03
1.347131e-01 8.669754e-04
1.347145e-01 1.960354e-03
1.347145e-01 1.960354e-03
1.347169e-01 -4.087725e-03
1.347191e-01 7.184203e-04
1.347193e-01 -2.326054e-03
1.347315e-01 -9.917094e-05
1.347322e-01 -1.622229e-04
1.347326e-01 -1.729634e-04
1.347331e-01 3.085151e-03
1.347508e-01 -9.102842e-04
1.347508e-01 5.846520e-04
1.347511e-01 1.440231e-04
1.347519e-01 -9.107731e-04
1.347523e-01 -1.206564e-03
1.347559e-01 9.280431e-04
1.347640e-01 -9.737826e-04
1.347681e-01 -1.529124e-04
1.347820e-01 1.574590e-03
1.347867e-01 -6.746489e-04
1.347893e-01 1.543536e-03
1.348020e-01 2.265481e-03
1.348061e-01 -6.864476e-04
1.348092e-01 -9.178488e-04
1.348094e-01 -2.123717e-04
1.348123e-01 -2.178222e-04
1.348162e-01 1.788465e-03
1.348235e-01 3.251047e-03
1.348345e-01 2.672976e-03
1.348385e-01 -3.969968e-04
1.348519e-01 2.808147e-03
1.348671e-01 -2.423081e-03
1.348687e-01 -3.900049e-04
1.348727e-01 -1.464639e-03
1.348772e-01 -1.026413e-03
1.348778e-01 -4.409364e-04
1.348808e-01 1.457367e-03
1.348950e-01 -5.534137e-04
1.348996e-01 -1.258925e-03
1.349051e-01 6.267929e-03
1.349139e-01 -8.870941e-04
1.349154e-01 1.800464e-03
1.349169e-01 8.369249e-04
1.349175e-01 1.432051e-03
1.349175e-01 1.432051e-03
1.349253e-01 -1.175287e-03
1.349309e-01 -2.779779e-04
1.349341e-01 -4.037790e-03
1.349348e-01 3.626161e-04
1.349402e-01 5.746665e-04
1.349555e-01 -4.603201e-04
1.349565e-01 -1.910281e-03
1.349610e-01 1.143420e-03
1.349678e-01 -1.369797e-03
1.349695e-01 1.393148e-03
1.349695e-01 1.393148e-03
1.349865e-01 4.266862e-03
1.349936e-01 3.023183e-04
1.350110e-01 -5.741046e-04
1.350154e-01 -1.559408e-03
1.350221e-01 4.501340e-03
1.350272e-01 4.002125e-03
1.350349e-01 2.046402e-03
1.350379e-01 -1.594461e-03
1.350527e-01 2.623603e-03
1.350581e-01 1.821223e-04
1.350679e-01 8.724391e-04
1.350684e-01 8.898692e-04
1.350769e-01 -5.038802e-04
1.350776e-01 -7.806463e-05
1.350794e-01 -1.423048e-03
1.350921e-01 -2.144630e-03
1.351011e-01 4.765094e-05
1.351021e-01 2.236405e-03
1.351028e-01 -2.356667e-03
1.351100e-01 3.703752e-04
1.351168e-01 -8.123613e-04
1.351181e-01 4.401334e-03
1.351302e-01 4.168949e-04
1.351341e-01 -3.204328e-04
1.351394e-01 6.296431e-03
1.351515e-01 -1.763947e-03
1.351539e-01 8.969618e-04
1.351546e-01 -6.082492e-04
1.351576e-01 -6.620733e-04
1.351592e-01 9.871756e-04
1.351612e-01 4.187976e-03
1.351695e-01 -2.333940e-04
1.351722e-01 4.444776e-03
1.351770e-01 6.210628e-04
1.351782e-01 -2.317162e-03
1.351786e-01 -1.662960e-03
1.351851e-01 1.911907e-03
1.351854e-01 3.256471e-03
1.351997e-01 1.383736e-03
1.352111e-01 1.812913e-03
1.352124e-01 8.385270e-04
1.352150e-01 -1.834723e-03
1.352245e-01 5.978935e-03
1.352613e-01 1.025188e-03
1.352671e-01 1.224379e-03
1.352681e-01 -7.758347e-04
1.352746e-01 9.010919e-04
1.352749e-01 -1.186422e-03
1.352786e-01 8.118965e-04
1.352822e-01 5.992226e-04
1.352896e-01 1.824721e-03
1.352939e-01 1.655159e-03
1.352968e-01 1.849088e-03
1.353075e-01 1.930974e-03
1.353095e-01 -1.637932e-03
1.353377e-01 2.184632e-04
1.353391e-01 1.055457e-03
1.353409e-01 3.436858e-03
1.353469e-01 2.080536e-03
1.353479e-01 1.033819e-03
1.353499e-01 1.023220e-03
1.353509e-01 -4.008578e-04
1.353533e-01 5.572576e-03
1.353545e-01 2.993256e-03
1.353648e-01 -1.995608e-03
1.353777e-01 9.322680e-03
1.353822e-01 4.718484e-04
1.353848e-01 1.648564e-03
1.353848e-01 1.648564e-03
1.353857e-01 -7.299230e-04
1.353868e-01 2.368452e-03
1.353884e-01 5.858514e-04
1.353902e-01 2.220309e-03
1.353904e-01 7.022437e-04
1.353905e-01 -2.941358e-04
1.353909e-01 -2.438269e-03
1.353980e-01 1.904114e-03
1.354021e-01 1.611231e-03
1.354027e-01 -1.881980e-03
1.354124e-01 1.240029e-03
1.354255e-01 6.752347e-04
1.354355e-01 -2.075912e-03
1.354396e-01 -3.474197e-04
1.354457e-01 9.075729e-04
1.354461e-01 1.673750e-03
1.354513e-01 2.121549e-03
1.354522e-01 -1.211491e-03
1.354566e-01 3.337164e-04
1.354591e-01 -1.554968e-03
1.354662e-01 9.092675e-03
1.354688e-01 2.027096e-03
1.354711e-01 -2.975188e-03
1.354729e-01 1.210317e-03
1.354784e-01 5.126310e-04
1.354804e-01 -1.095625e-03
1.354893e-01 -1.138054e-03
1.354956e-01 -1.606093e-03
1.354958e-01 6.942382e-04
1.355020e-01 -5.183339e-04
1.355023e-01 -3.176670e-04
1.355211e-01 8.328311e-04
1.355234e-01 2.963029e-03
1.355242e-01 2.103556e-03
1.355328e-01 1.582307e-03
1.355482e-01 6.649516e-04
1.355529e-01 -1.999960e-03
1.355547e-01 -9.535566e-04
1.355573e-01 -1.332817e-03
1.355719e-01 3.561368e-04
1.355830e-01 -1.493613e-03
1.355844e-01 1.614813e-03
1.356104e-01 2.546650e-04
1.356116e-01 5.932916e-03
1.356205e-01 -1.720476e-03
1.356210e-01 -1.483757e-03
1.356217e-01 -1.451704e-03
1.356235e-01 5.643596e-03
1.356268e-01 -3.862244e-04
1.356290e-01 2.697455e-04
1.356295e-01 2.449513e-03
1.356314e-01 5.142971e-03
1.356440e-01 -1.889953e-04
1.356541e-01 -2.091387e-03
1.356575e-01 -4.925943e-03
1.356639e-01 -7.972510e-04
1.356872e-01 -1.568110e-03
1.356952e-01 2.160601e-04
1.356970e-01 -2.323248e-03
1.356983e-01 -3.444423e-04
1.357011e-01 -1.467316e-03
1.357027e-01 3.323312e-03
1.357114e-01 -2.422048e-03
1.357197e-01 9.493726e-04
1.357236e-01 7.848124e-03
1.357323e-01 -3.798713e-04
1.357423e-01 3.353438e-03
1.357490e-01 -1.675932e-03
1.357490e-01 -1.675932e-03
1.357503e-01 -1.082669e-03
1.357507e-01 -1.756677e-03
1.357529e-01 3.929465e-03
1.357636e-01 -5.757515e-04
1.357715e-01 -1.626484e-03
1.357738e-01 -9.086454e-04
1.357777e-01 2.352542e-03
1.357814e-01 2.258560e-03
1.357908e-01 -6.761328e-04
1.358082e-01 7.021908e-04
1.358159e-01 5.204339e-04
1.358209e-01 9.706034e-04
1.358297e-01 6.019812e-03
1.358389e-01 3.960913e-03
1.358452e-01 -2.239346e-04
1.358474e-01 1.636284e-03
1.358641e-01 1.339811e-03
1.358781e-01 -2.084584e-03
1.358814e-01 -1.706053e-03
1.358827e-01 -1.858516e-03
1.359028e-01 -1.589101e-03
1.359039e-01 2.646081e-04
1.359052e-01 -2.100408e-04
1.359140e-01 2.358041e-03
1.359145e-01 9.845160e-04
1.359188e-01 -1.004779e-03
1.359288e-01 -4.633286e-03
1.359293e-01 3.833133e-03
1.359339e-01 1.362861e-03
1.359344e-01 -5.821135e-06
1.359366e-01 1.364392e-03
1.359384e-01 -1.243519e-03
1.359393e-01 -2.724847e-03
1.359407e-01 -2.696495e-03
1.359508e-01 -3.913002e-04
1.359595e-01 -1.209121e-06
1.359631e-01 -1.303613e-03
1.359652e-01 -1.105256e-04
1.359662e-01 5.058424e-03
1.359734e-01 -8.438469e-04
1.359776e-01 2.981041e-03
1.359777e-01 4.650248e-04
1.359783e-01 3.731192e-03
1.359787e-01 1.084278e-03
1.359840e-01 1.391155e-04
1.359886e-01 3.048324e-03
1.359910e-01 1.174981e-03
1.359921e-01 3.531093e-03
1.359949e-01 6.381542e-04
1.359951e-01 -1.196788e-04
1.360132e-01 -2.152352e-03
1.360226e-01 3.362176e-03
1.360348e-01 3.601166e-03
1.360381e-01 -4.253813e-03
1.360389e-01 -8.627390e-04
1.360424e-01 -3.408414e-04
1.360504e-01 6.026255e-04
1.360603e-01 1.274577e-03
1.360710e-01 1.232725e-03
1.360763e-01 1.918135e-05
1.360854e-01 -2.349576e-04
1.360973e-01 8.957354e-04
1.360994e-01 -8.898467e-04
1.361130e-01 -3.689811e-04
1.361156e-01 -7.990258e-05
1.361174e-01 3.739406e-04
1.361261e-01 3.835662e-03
1.361284e-01 1.793347e-03
1.361381e-01 -3.031589e-03
1.361421e-01 -1.105428e-03
1.361494e-01 -1.943750e-03
1.361495e-01 1.702616e-03
1.361552e-01 -4.095864e-04
1.361655e-01 -9.322244e-04
1.361793e-01 5.321326e-04
1.362112e-01 6.714033e-03
1.362126e-01 4.185880e-04
1.362172e-01 -3.173413e-03
1.362270e-01 3.918920e-04
1.362295e-01 -1.933895e-03
1.362313e-01 9.329103e-04
1.362377e-01 8.581637e-04
1.362430e-01 3.768849e-03
1.362465e-01 -2.281350e-03
1.362479e-01 1.644823e-04
1.362552e-01 2.462929e-04
1.362615e-01 4.417834e-03
1.362648e-01 6.032832e-03
1.362679e-01 -1.078872e-03
1.362747e-01 -3.125027e-03
1.362771e-01 -1.102753e-04
1.362778e-01 -1.509531e-03
1.362788e-01 4.582105e-03
1.362816e-01 3.345615e-04
1.362826e-01 -8.983767e-04
1.363117e-01 -1.280176e-03
1.363117e-01 -1.280176e-03
1.363143e-01 -1.451563e-03
1.363260e-01 -6.517348e-04
1.363329e-01 1.311028e-03
1.363383e-01 8.061849e-04
1.363383e-01 8.061849e-04
1.363430e-01 2.393358e-03
1.363448e-01 1.272556e-03
1.363526e-01 1.134050e-04
1.363674e-01 -4.897766e-05
1.363746e-01 2.473524e-03
1.363772e-01 1.128859e-03
1.363782e-01 3.580697e-03
1.363864e-01 -4.927640e-05
1.363864e-01 -4.927640e-05
1.363903e-01 5.234805e-03
1.363958e-01 -8.610508e-04
1.364045e-01 -6.478738e-05
1.364154e-01 5.026346e-04
1.364345e-01 -5.153436e-04
1.364362e-01 1.143263e-03
1.364465e-01 1.342122e-03
1.364510e-01 -2.148710e-03
1.364563e-01 -3.485432e-03
1.364566e-01 1.553613e-03
1.364771e-01 -1.732485e-03
1.364957e-01 -1.323476e-03
1.364992e-01 1.268849e-03
1.364995e-01 1.512826e-03
1.365022e-01 8.771498e-04
1.365033e-01 -4.985360e-03
1.365176e-01 -4.777175e-05
1.365184e-01 -5.129137e-04
1.365226e-01 -2.143307e-03
1.365313e-01 -7.125525e-04
1.365334e-01 1.598677e-03
1.365339e-01 -2.237040e-03
1.365392e-01 -5.261727e-03
1.365403e-01 5.201399e-05
1.365435e-01 -1.172790e-04
1.365562e-01 1.099169e-03
1.365728e-01 3.443574e-04
1.365851e-01 8.015093e-04
1.365863e-01 3.480418e-03
1.365868e-01 -1.406798e-03
1.365869e-01 1.960703e-03
1.365907e-01 1.369795e-03
1.365921e-01 7.098897e-04
1.366102e-01 7.075654e-04
1.366109e-01 1.363327e-03
1.366168e-01 -1.478831e-03
1.366177e-01 -1.190264e-03
1.366201e-01 -1.737386e-03
1.366218e-01 6.154424e-03
1.366425e-01 -6.356999e-04
1.366459e-01 4.045225e-03
1.366475e-01 3.173124e-04
1.366530e-01 7.932801e-04
1.366826e-01 1.085096e-03
1.366832e-01 -6.577508e-03
1.366873e-01 -1.035013e-03
1.366923e-01 -1.855468e-03
1.366951e-01 2.386611e-03
1.367107e-01 3.262476e-03
1.367154e-01 -2.762617e-03
1.367176e-01 8.578236e-04
1.367200e-01 2.090594e-03
1.367276e-01 1.803161e-04
1.367458e-01 -6.896158e-04
1.367478e-01 -2.989943e-03
1.367509e-01 -1.551295e-03
1.367534e-01 2.177538e-03
1.367553e-01 -1.429744e-03
1.367555e-01 1.163065e-03
1.367610e-01 6.604137e-04
1.367938e-01 1.952857e-04
1.367980e-01 -1.985758e-03
1.367985e-01 2.829984e-03
1.368101e-01 9.461752e-04
1.368140e-01 -1.183255e-03
1.368163e-01 2.229254e-03
1.368170e-01 9.491829e-04
1.368189e-01 -1.185889e-03
1.368195e-01 -3.285367e-05
1.368280e-01 2.015698e-03
1.368298e-01 1.046665e-03
1.368406e-01 -2.495719e-03
1.368417e-01 -1.686659e-03
1.368432e-01 2.350129e-03
1.368454e-01 -9.253320e-04
1.368463e-01 1.651007e-03
1.368518e-01 -1.581145e-03
1.368524e-01 -3.530147e-04
1.368524e-01 -3.530147e-04
1.368527e-01 -7.853946e-04
1.368598e-01 1.097023e-03
1.368647e-01 -8.481393e-04
1.368691e-01 2.342027e-03
1.368718e-01 -3.025196e-04
1.368828e-01 2.886289e-03
1.368841e-01 5.156378e-04
1.368866e-01 1.129832e-03
1.369031e-01 -6.072127e-04
1.369041e-01 7.861882e-03
1.369060e-01 3.479918e-03
1.369071e-01 -4.094817e-04
1.369078e-01 8.661082e-04
1.369082e-01 7.176977e-04
1.369210e-01 1.576936e-03
1.369300e-01 3.896384e-03
1.369306e-01 -4.337908e-04
1.369372e-01 -6.834550e-04
1.369384e-01 -2.158593e-03
1.369384e-01 -2.158593e-03
1.369415e-01 -1.340805e-04
1.369519e-01 3.486953e-03
1.369637e-01 6.239336e-03
1.369707e-01 2.409245e-03
1.369727e-01 -7.763258e-04
1.369788e-01 2.114264e-03
1.369799e-01 -1.727480e-03
1.369805e-01 3.247751e-04
1.369833e-01 -1.046959e-03
1.370001e-01 -2.372182e-04
1.370014e-01 -6.865206e-04
1.370014e-01 1.597063e-03
1.370183e-01 -4.457743e-03
1.370279e-01 1.154127e-03
1.370292e-01 -1.639964e-03
1.370511e-01 -2.862323e-03
1.370561e-01 -1.494277e-03
1.370561e-01 -1.975710e-03
1.370564e-01 -2.831812e-04
1.370582e-01 -1.477861e-03
1.370589e-01 -5.644292e-05
1.370668e-01 -9.185578e-04
1.370681e-01 -3.269716e-03
1.370727e-01 3.269386e-03
1.370739e-01 1.848643e-03
1.370902e-01 3.397773e-03
1.370993e-01 1.058284e-03
1.371022e-01 1.617970e-03
1.371035e-01 -3.607859e-03
1.371120e-01 1.898909e-03
1.371122e-01 1.487576e-03
1.371192e-01 7.236900e-04
1.371208e-01 9.604897e-03
1.371277e-01 4.468193e-03
1.371300e-01 8.760187e-04
1.371300e-01 8.760187e-04
1.371317e-01 -1.226434e-03
1.371455e-01 9.795141e-05
1.371593e-01 3.412806e-03
1.371625e-01 -1.505202e-03
1.371693e-01 -1.299003e-03
1.371721e-01 3.167998e-03
1.371802e-01 -2.323652e-03
1.371941e-01 -2.905077e-04
1.371983e-01 -2.054932e-03
1.372021e-01 -1.288044e-04
1.372085e-01 4.232202e-03
1.372131e-01 -1.008770e-03
1.372171e-01 2.262048e-03
1.372238e-01 3.796716e-03
1.372468e-01 -1.857948e-03
1.372519e-01 2.397877e-03
1.372659e-01 4.895723e-03
1.372761e-01 -1.251597e-03
1.372883e-01 5.021241e-03
1.372943e-01 -1.828981e-03
1.372943e-01 -1.828981e-03
1.372965e-01 3.634084e-04
1.372975e-01 6.529853e-04
1.373014e-01 4.192928e-04
1.373034e-01 -8.247119e-04
1.373043e-01 7.171412e-04
1.373100e-01 4.598622e-03
1.373195e-01 -2.693506e-03
1.373257e-01 -3.912497e-04
1.373264e-01 1.040415e-03
1.373329e-01 -2.882953e-03
1.373387e-01 3.737156e-04
1.373394e-01 1.503856e-03
1.373463e-01 3.315940e-03
1.373546e-01 2.592778e-04
1.373624e-01 -1.171092e-03
1.373691e-01 4.726627e-03
1.373799e-01 -1.723202e-03
1.373887e-01 1.423939e-03
1.373899e-01 -6.498190e-04
1.373907e-01 -2.221739e-03
1.373923e-01 -3.372043e-03
1.374017e-01 1.162790e-03
1.374101e-01 -2.543398e-04
1.374116e-01 1.031218e-03
1.374139e-01 -4.893814e-04
1.374166e-01 -3.876330e-04
1.374217e-01 1.276947e-04
1.374243e-01 1.153567e-04
1.374274e-01 -8.820074e-05
1.374278e-01 8.247652e-05
1.374312e-01 -4.850442e-03
1.374312e-01 -4.850442e-03
1.374318e-01 1.069635e-03
1.374331e-01 -7.423229e-04
1.374376e-01 1.291125e-04
1.374394e-01 6.600920e-04
1.374467e-01 2.020521e-03
1.374542e-01 4.491134e-03
1.374609e-01 2.554974e-03
1.374609e-01 2.554974e-03
1.374627e-01 -2.926007e-04
1.374776e-01 4.238779e-03
1.374801e-01 1.912768e-03
1.374810e-01 4.467420e-03
1.374827e-01 -1.656539e-03
1.374876e-01 1.477490e-03
1.374949e-01 2.141076e-04
1.374977e-01 1.789366e-03
1.374994e-01 9.702214e-06
1.375116e-01 -6.277772e-03
1.375163e-01 -2.932394e-03
1.375179e-01 -1.143873e-04
1.375199e-01 -1.305819e-03
1.375211e-01 2.213236e-03
1.375276e-01 6.580381e-05
1.375283e-01 1.078532e-03
1.375320e-01 5.080279e-04
1.375320e-01 3.987458e-03
1.375339e-01 1.103787e-03
1.375346e-01 5.577614e-04
1.375498e-01 -7.776704e-04
1.375517e-01 2.875792e-03
1.375613e-01 -6.815846e-04
1.375619e-01 1.918170e-03
1.375631e-01 -1.090506e-03
1.375696e-01 -9.416422e-04
1.375857e-01 -1.923106e-03
1.375900e-01 -7.024988e-06
1.375968e-01 -5.059746e-04
1.376008e-01 1.181893e-03
1.376036e-01 -1.272755e-03
1.376162e-01 2.628088e-03
1.376417e-01 7.449457e-04
1.376430e-01 -1.360710e-03
1.376577e-01 1.088500e-03
1.376629e-01 -1.139334e-03
1.376635e-01 6.913726e-04
1.376641e-01 -2.175711e-04
1.376651e-01 -1.125106e-03
1.376749e-01 2.585372e-04
1.376752e-01 1.912014e-03
1.376798e-01 2.700752e-03
1.376799e-01 2.830071e-03
1.376839e-01 2.386985e-03
1.376913e-01 -1.245461e-03
1.376938e-01 3.457716e-03
1.376993e-01 2.043665e-03
1.377027e-01 7.729163e-04
1.377073e-01 1.932344e-03
1.377107e-01 1.388102e-03
1.377121e-01 -6.532292e-04
1.377121e-01 2.331375e-04
1.377151e-01 8.342068e-04
1.377164e-01 1.703645e-03
1.377174e-01 -3.531201e-03
1.377268e-01 2.127157e-03
1.377286e-01 2.228480e-04
1.377333e-01 -9.464914e-04
1.377477e-01 3.016059e-04
1.377478e-01 4.469458e-04
1.377544e-01 2.813055e-03
1.377721e-01 -1.961820e-03
1.377771e-01 -4.180907e-03
1.377798e-01 -6.548373e-03
1.377799e-01 3.809572e-04
1.377994e-01 2.301606e-03
1.378085e-01 -1.029511e-03
1.378169e-01 2.435301e-03
1.378255e-01 1.711415e-03
1.378344e-01 -1.165065e-03
1.378415e-01 -4.490628e-04
1.378559e-01 -3.555530e-03
1.378604e-01 -2.814325e-03
1.378654e-01 8.072623e-04
1.378730e-01 -1.317061e-04
1.378822e-01 6.780497e-03
1.378829e-01 -1.942182e-04
1.378829e-01 -1.942182e-04
1.378861e-01 2.434979e-03
1.378871e-01 -8.980267e-04
1.378969e-01 1.315683e-04
1.379021e-01 -1.451614e-03
1.379048e-01 -2.750693e-03
1.379091e-01 2.247724e-04
1.379111e-01 4.479017e-03
1.379303e-01 2.001065e-03
1.379399e-01 -2.161907e-03
1.379486e-01 4.223087e-04
1.379488e-01 -1.972844e-04
1.379530e-01 1.517706e-03
1.379569e-01 4.166213e-03
1.379627e-01 4.636461e-03
1.379662e-01 6.305659e-04
1.379759e-01 -8.103907e-04
1.379797e-01 9.736898e-04
1.379882e-01 -1.272128e-03
1.379885e-01 5.810152e-04
1.379944e-01 1.030214e-03
1.379964e-01 1.550241e-03
1.380031e-01 1.897854e-03
1.380075e-01 6.021137e-04
1.380078e-01 1.561701e-03
1.380301e-01 -1.049450e-03
1.380327e-01 -1.074309e-03
1.380402e-01 -2.244881e-03
1.380423e-01 -1.313291e-03
1.380426e-01 4.041214e-03
1.380485e-01 -4.414321e-03
1.380524e-01 3.461852e-04
1.380540e-01 1.345175e-02
1.380564e-01 1.098978e-03
1.380585e-01 -1.776407e-03
1.380645e-01 2.736406e-03
1.380659e-01 1.177311e-03
1.380685e-01 2.153283e-03
1.380835e-01 -1.687037e-03
1.380854e-01 -5.827176e-03
1.380864e-01 -1.984001e-03
1.380887e-01 -3.482965e-03
1.380941e-01 2.075583e-03
1.380989e-01 1.604795e-04
1.381028e-01 1.449466e-03
1.381031e-01 -3.265493e-03
1.381081e-01 1.064416e-03
1.381108e-01 -1.156422e-03
1.381131e-01 -1.064156e-03
1.381277e-01 1.721406e-03
1.381286e-01 -3.647567e-03
1.381307e-01 -2.409972e-04
1.381331e-01 -1.620194e-03
1.381375e-01 2.240463e-03
1.381382e-01 9.140611e-03
1.381432e-01 -2.518455e-04
1.381516e-01 -4.345904e-04
1.381593e-01 4.045258e-03
1.381623e-01 4.225634e-05
1.381636e-01 7.272189e-03
1.381726e-01 -1.792035e-03
1.381880e-01 -2.420870e-03
1.382020e-01 4.179731e-03
1.382048e-01 3.100107e-04
1.382189e-01 -2.487249e-03
1.382316e-01 1.597354e-03
1.382441e-01 1.808492e-04
1.382490e-01 6.696918e-04
1.382547e-01 -1.033326e-03
1.382583e-01 5.488558e-03
1.382653e-01 5.617529e-03
1.382687e-01 -2.479759e-04
1.382789e-01 1.463299e-03
1.382866e-01 -4.623872e-04
1.382941e-01 6.006124e-04
1.383027e-01 1.803073e-04
1.383081e-01 -7.679241e-04
1.383170e-01 1.985993e-03
1.383247e-01 -9.281817e-04
1.383261e-01 6.584748e-03
1.383261e-01 2.850241e-04
1.383299e-01 -5.704262e-04
1.383508e-01 1.712069e-03
1.383561e-01 -2.533439e-04
1.383575e-01 -2.839259e-03
1.383598e-01 -1.052503e-03
1.383640e-01 -1.971947e-03
1.383681e-01 -1.505031e-03
1.383725e-01 -1.002394e-03
1.383830e-01 1.158007e-03
1.383842e-01 -2.750296e-04
1.383855e-01 1.061275e-03
1.383896e-01 -7.850475e-04
1.383938e-01 2.371320e-03
1.383967e-01 1.211353e-03
1.383975e-01 2.880563e-03
1.384013e-01 1.002930e-03
1.384052e-01 -6.884243e-05
1.384096e-01 3.882782e-03
1.384123e-01 2.693345e-03
1.384215e-01 5.537079e-04
1.384267e-01 -2.668396e-03
1.384274e-01 2.451454e-03
1.384303e-01 1.873535e-03
1.384348e-01 2.608322e-03
1.384358e-01 1.172875e-03
1.384368e-01 -3.948015e-03
1.384458e-01 1.160363e-04
1.384468e-01 -1.983916e-03
1.384484e-01 2.717887e-04
1.384553e-01 1.335560e-02
1.384711e-01 -3.410347e-03
1.384720e-01 3.599177e-03
1.384722e-01 7.034410e-05
1.384763e-01 -3.549341e-05
1.384801e-01 -2.227043e-03
1.384827e-01 9.546015e-04
1.384854e-01 -6.777182e-04
1.384860e-01 -2.888882e-04
1.385009e-01 -3.501859e-03
1.385104e-01 1.060473e-03
1.385133e-01 -1.235758e-03
1.385329e-01 -1.322784e-03
1.385358e-01 1.084405e-03
1.385388e-01 -9.300757e-04
1.385389e-01 -1.515418e-03
1.385438e-01 -1.394013e-04
1.385631e-01 4.733452e-03
1.385631e-01 4.733452e-03
1.385831e-01 -2.047849e-03
1.385915e-01 4.676534e-03
1.385957e-01 -1.342643e-03
1.386068e-01 2.139547e-03
1.386250e-01 5.464677e-04
1.386269e-01 -2.272203e-03
1.386340e-01 -1.119960e-03
1.386387e-01 4.684358e-04
1.386443e-01 -3.368698e-03
1.386465e-01 -4.304711e-04
1.386470e-01 2.777363e-03
1.386476e-01 -6.703982e-04
1.386567e-01 1.205392e-03
1.386578e-01 -2.681599e-03
1.386579e-01 -3.887835e-03
1.386646e-01 6.643721e-03
1.386707e-01 5.840388e-04
1.386774e-01 8.983312e-04
1.386802e-01 -1.644270e-03
1.386839e-01 5.817614e-04
1.386863e-01 -2.709244e-03
1.386906e-01 5.516330e-04
1.386943e-01 1.186504e-03
1.387030e-01 2.761909e-03
1.387043e-01 4.845484e-03
1.387052e-01 2.112390e-03
1.387065e-01 4.459331e-04
1.387066e-01 1.517865e-03
1.387085e-01 -1.251488e-03
1.387131e-01 -1.696278e-03
1.387196e-01 6.804131e-04
1.387211e-01 3.487813e-03
1.387211e-01 -3.341203e-04
1.387223e-01 -1.275552e-03
1.387279e-01 -2.796851e-04
1.387283e-01 1.428256e-03
1.387313e-01 4.601596e-03
1.387415e-01 -2.225067e-03
1.387478e-01 -7.570056e-04
1.387524e-01 7.837757e-05
1.387533e-01 4.645129e-04
1.387578e-01 5.318200e-03
1.387582e-01 2.120659e-03
1.387639e-01 4.253503e-03
1.387662e-01 -4.080374e-04
1.387802e-01 9.410371e-03
1.387808e-01 7.024544e-05
1.387815e-01 -1.007202e-03
1.387820e-01 -9.597035e-05
1.387839e-01 -1.425184e-03
1.388002e-01 2.679182e-03
1.388005e-01 -2.256852e-03
1.388096e-01 5.275840e-04
1.388133e-01 -4.844842e-04
1.388203e-01 4.802270e-04
1.388256e-01 -6.016737e-04
1.388288e-01 -4.317449e-04
1.388288e-01 -4.317449e-04
1.388347e-01 8.145220e-04
1.388390e-01 -6.589509e-04
1.388390e-01 1.141788e-03
1.388436e-01 4.291780e-03
1.388450e-01 7.152314e-04
1.388450e-01 2.019781e-03
1.388488e-01 -2.663288e-03
1.388495e-01 1.801264e-03
1.388495e-01 1.801264e-03
1.388608e-01 -1.985614e-03
1.388620e-01 -2.292867e-03
1.388653e-01 3.800084e-03
1.388654e-01 1.047302e-03
1.388673e-01 -1.570038e-03
1.388713e-01 -9.869525e-04
1.388800e-01 1.986803e-04
1.388816e-01 -8.011334e-04
1.388845e-01 -9.120416e-04
1.388913e-01 9.810644e-04
1.388931e-01 9.822088e-04
1.388966e-01 -8.601353e-04
1.388967e-01 -2.457257e-03
1.389007e-01 4.163593e-03
1.389073e-01 -1.308921e-03
1.389087e-01 -1.522094e-03
1.389157e-01 2.480943e-03
1.389165e-01 -8.526097e-04
1.389256e-01 2.085894e-03
1.389290e-01 -2.456674e-04
1.389473e-01 1.401259e-03
1.389474e-01 -2.162494e-03
1.389575e-01 9.652069e-04
1.389608e-01 -1.674967e-03
1.389628e-01 1.014599e-03
1.389653e-01 -9.922955e-04
1.389712e-01 1.994533e-04
1.389938e-01 -2.749955e-03
1.389943e-01 -1.153822e-03
1.389944e-01 -3.357229e-05
1.389966e-01 -9.768303e-04
1.389993e-01 -1.702236e-03
1.390021e-01 -1.550493e-03
1.390021e-01 2.079993e-03
1.390065e-01 8.489445e-04
1.390189e-01 3.643630e-03
1.390253e-01 -2.783015e-03
1.390295e-01 -4.327187e-04
1.390367e-01 1.675462e-03
1.390413e-01 -4.578508e-03
1.390515e-01 4.734703e-03
1.390522e-01 2.455895e-04
1.390560e-01 3.453594e-04
1.390587e-01 -1.418174e-03
1.390590e-01 4.983274e-03
1.390628e-01 3.633888e-03
1.390651e-01 -5.054770e-04
1.390654e-01 9.508690e-04
1.390657e-01 -4.483075e-04
1.390675e-01 -1.246268e-03
1.390691e-01 -1.228774e-03
1.390691e-01 -3.381762e-03
1.390708e-01 -2.401788e-03
1.390754e-01 2.119293e-04
1.390794e-01 -1.112424e-04
1.390977e-01 2.489144e-03
1.391134e-01 -1.216802e-04
1.391265e-01 -7.084655e-04
1.391283e-01 -5.828769e-04
1.391293e-01 3.893688e-03
1.391301e-01 -1.507224e-04
1.391307e-01 1.306376e-03
1.391312e-01 1.345431e-03
1.391521e-01 1.137605e-03
1.391560e-01 -6.399513e-04
1.391648e-01 -1.357444e-04
1.391685e-01 1.213568e-04
1.391709e-01 1.370587e-03
1.391724e-01 -2.989328e-04
1.391763e-01 -6.864843e-04
1.391794e-01 8.337441e-04
1.391895e-01 -2.311598e-03
1.391978e-01 1.140189e-03
1.392021e-01 -1.279291e-03
1.392098e-01 -2.880741e-03
1.392105e-01 4.812015e-03
1.392209e-01 2.539545e-04
1.392235e-01 1.051467e-03
1.392317e-01 5.945297e-03
1.392327e-01 -1.704068e-03
1.392384e-01 -4.010235e-03
1.392389e-01 4.272248e-03
1.392461e-01 6.356090e-04
1.392500e-01 1.696906e-03
1.392516e-01 9.765244e-05
1.392571e-01 3.816390e-03
1.392622e-01 1.115183e-03
1.392643e-01 -1.457522e-03
1.392655e-01 7.197748e-04
1.392699e-01 -6.747612e-04
1.392794e-01 1.076205e-03
1.392806e-01 8.457817e-04
1.392831e-01 2.429070e-03
1.392878e-01 -8.427554e-04
1.392948e-01 -3.080770e-03
1.392953e-01 2.212091e-03
1.393119e-01 4.928173e-03
1.393131e-01 -2.549480e-03
1.393140e-01 8.400789e-04
1.393174e-01 2.086499e-03
1.393201e-01 -1.274504e-03
1.393206e-01 -6.309136e-05
1.393276e-01 -1.846555e-03
1.393377e-01 5.804296e-03
1.393495e-01 -2.075312e-04
1.393509e-01 5.744084e-03
1.393540e-01 1.051920e-03
1.393596e-01 3.458232e-03
1.393649e-01 -1.656517e-03
1.393671e-01 -3.461631e-03
1.393707e-01 -6.597888e-04
1.393797e-01 -1.490726e-03
1.393913e-01 -1.174961e-03
1.393966e-01 3.182959e-03
1.394200e-01 1.258167e-03
1.394200e-01 3.005915e-03
1.394203e-01 2.371454e-03
1.394263e-01 -2.071580e-03
1.394315e-01 2.298681e-03
1.394330e-01 -3.288650e-03
1.394364e-01 1.285219e-03
1.394365e-01 -2.035536e-03
1.394464e-01 -1.267398e-03
1.394699e-01 -8.262795e-04
1.394745e-01 7.203596e-04
1.394826e-01 1.555210e-03
1.394885e-01 -2.104409e-04
1.394889e-01 2.524494e-03
1.394981e-01 2.785368e-03
1.395027e-01 -3.840296e-03
1.395090e-01 3.222081e-03
1.395141e-01 -9.397347e-04
1.395146e-01 1.847244e-03
1.395255e-01 -1.474672e-03
1.395273e-01 9.609414e-04
1.395275e-01 2.290360e-03
1.395422e-01 1.960055e-03
1.395441e-01 1.776630e-03
1.395493e-01 -1.884419e-03
1.395502e-01 -8.301781e-04
1.395502e-01 -8.301781e-04
1.395537e-01 5.890763e-05
1.395666e-01 4.426223e-03
1.395700e-01 1.090330e-03
1.395744e-01 8.115191e-04
1.395766e-01 -1.287757e-03
1.395799e-01 4.420161e-03
1.395824e-01 3.267125e-03
1.395924e-01 2.557899e-04
1.395924e-01 2.557899e-04
1.395960e-01 7.715780e-04
1.395983e-01 -1.845302e-03
1.396086e-01 -9.729224e-04
1.396121e-01 -7.299204e-04
1.396172e-01 3.826263e-03
1.396231e-01 -5.163949e-05
1.396365e-01 2.118506e-03
1.396410e-01 -3.607564e-04
1.396414e-01 -2.066902e-04
1.396421e-01 -2.331301e-03
1.396421e-01 -2.175102e-03
1.396435e-01 -1.508177e-03
1.396450e-01 5.106633e-04
1.396463e-01 1.146863e-03
1.396533e-01 7.132928e-03
1.396545e-01 -1.329053e-03
1.396565e-01 6.588639e-04
1.396616e-01 5.434765e-04
1.396622e-01 -5.628313e-04
1.396681e-01 2.751743e-04
1.396728e-01 -2.808106e-03
1.396747e-01 2.534109e-03
1.396749e-01 -2.574524e-03
1.396826e-01 5.401222e-05
1.396920e-01 1.284334e-03
1.396977e-01 -1.366098e-03
1.396991e-01 -2.673173e-04
1.397051e-01 2.083772e-03
1.397088e-01 1.219148e-03
1.397099e-01 -2.078582e-04
1.397276e-01 8.885238e-04
1.397313e-01 4.391711e-03
1.397329e-01 1.114815e-03
1.397366e-01 1.308184e-03
1.397371e-01 -3.160286e-03
1.397390e-01 1.233960e-03
1.397427e-01 -1.583228e-03
1.397458e-01 -5.106765e-03
1.397489e-01 -1.037181e-03
1.397571e-01 8.660669e-05
1.397631e-01 1.701347e-03
1.397678e-01 -3.252640e-03
1.397734e-01 1.941480e-03
1.397763e-01 2.723813e-04
1.397770e-01 3.413288e-03
1.397874e-01 4.683185e-04
1.397979e-01 -2.740073e-03
1.397981e-01 -1.643599e-03
1.398039e-01 -1.049123e-04
1.398101e-01 -2.473814e-03
1.398135e-01 -1.647489e-03
1.398150e-01 1.102472e-03
1.398176e-01 3.826599e-04
1.398176e-01 3.826599e-04
1.398183e-01 -8.072675e-04
1.398249e-01 6.243480e-03
1.398266e-01 4.137203e-04
1.398364e-01 8.086161e-04
1.398662e-01 -3.970417e-04
1.398763e-01 1.415874e-03
1.398868e-01 3.667398e-03
1.398875e-01 -1.503732e-03
1.398945e-01 1.076735e-03
1.398955e-01 4.869954e-04
1.399015e-01 1.544411e-03
1.399052e-01 3.539644e-04
1.399085e-01 1.280651e-04
1.399098e-01 -9.659496e-04
1.399124e-01 3.076565e-04
1.399155e-01 -1.998502e-03
1.399227e-01 1.116087e-03
1.399247e-01 5.966815e-04
1.399253e-01 -1.747103e-03
1.399325e-01 -3.423751e-03
1.399465e-01 3.508974e-03
1.399485e-01 -1.495699e-03
1.399636e-01 -1.480050e-03
1.399689e-01 -2.946461e-03
1.399710e-01 -1.726019e-04
1.399716e-01 -3.397782e-04
1.399724e-01 4.427084e-04
1.399939e-01 6.803327e-04
1.399951e-01 6.177208e-04
1.400044e-01 -1.464247e-03
1.400134e-01 -1.776472e-03
1.400151e-01 1.187970e-03
1.400237e-01 6.881146e-03
1.400350e-01 4.517826e-03
1.400374e-01 -1.944650e-03
1.400428e-01 3.464787e-03
1.400447e-01 3.066593e-03
1.400448e-01 3.397812e-04
1.400454e-01 2.004818e-04
1.400496e-01 -1.474542e-04
1.400505e-01 2.543853e-03
1.400582e-01 1.129284e-02
1.400632e-01 -1.057180e-03
1.400682e-01 -1.874920e-03
1.400709e-01 2.275852e-03
1.400718e-01 -1.470151e-03
1.400775e-01 -6.311875e-04
1.400787e-01 -1.922857e-03
1.400794e-01 4.601180e-04
1.400826e-01 -5.587067e-04
1.400848e-01 3.944055e-03
1.400855e-01 -1.668435e-03
1.400925e-01 1.366876e-03
1.400949e-01 9.850382e-04
1.401014e-01 1.257931e-03
1.401024e-01 -1.425337e-03
1.401092e-01 3.796499e-03
1.401157e-01 1.256857e-03
1.401255e-01 -1.140708e-03
1.401273e-01 -4.049986e-03
1.401281e-01 -1.635430e-03
1.401412e-01 -4.420805e-03
1.401497e-01 8.483898e-04
1.401565e-01 2.018819e-03
1.401598e-01 5.136817e-03
1.401690e-01 -4.182156e-04
1.401701e-01 8.892190e-04
1.401748e-01 1.475503e-03
1.401928e-01 9.965938e-04
1.401949e-01 -3.311878e-04
1.401957e-01 1.930480e-03
1.401963e-01 2.846262e-03
1.401965e-01 -1.865788e-03
1.402051e-01 -5.756501e-04
1.402059e-01 2.695660e-03
1.402059e-01 2.695660e-03
1.402123e-01 -1.200056e-03
1.402239e-01 1.575307e-04
1.402257e-01 -2.217954e-03
1.402292e-01 -2.224349e-03
1.402328e-01 1.004454e-03
1.402350e-01 4.026271e-03
1.402355e-01 -2.018530e-03
1.402389e-01 2.591015e-03
1.402497e-01 -2.948934e-04
1.402540e-01 -2.126721e-03
1.402683e-01 -1.645857e-03
1.402763e-01 8.528171e-04
1.402765e-01 -7.739654e-04
1.402803e-01 8.349375e-04
1.402854e-01 3.044470e-03
1.402901e-01 -1.684387e-03
1.402952e-01 4.993842e-04
1.402984e-01 -2.648120e-03
1.403097e-01 1.569773e-03
1.403204e-01 -1.069565e-03
1.403343e-01 1.924290e-04
1.403400e-01 -1.216021e-03
1.403410e-01 -1.859577e-03
1.403447e-01 -6.290467e-04
1.403463e-01 1.286893e-03
1.403525e-01 5.857982e-03
1.403538e-01 -9.260112e-04
1.403545e-01 2.845172e-05
1.403578e-01 -2.514811e-03
1.403649e-01 -5.243071e-04
1.403703e-01 1.654470e-03
1.403726e-01 -2.327123e-03
1.403798e-01 -1.089466e-03
1.403802e-01 -2.166971e-03
1.403809e-01 -1.425324e-03
1.403834e-01 -5.153053e-04
1.403851e-01 -5.709107e-03
1.403859e-01 5.851631e-04
1.403872e-01 -3.815741e-04
1.403938e-01 -1.307562e-03
1.404036e-01 -5.176403e-04
1.404042e-01 -1.919852e-03
1.404085e-01 -1.416385e-03
1.404090e-01 9.647307e-04
1.404132e-01 -8.487513e-04
1.404183e-01 1.627136e-03
1.404274e-01 -3.947600e-03
1.404310e-01 -2.024727e-03
1.404331e-01 4.327046e-04
1.404333e-01 1.580945e-03
1.404455e-01 7.053628e-04
1.404480e-01 1.238999e-03
1.404501e-01 3.169381e-04
1.404553e-01 -2.669122e-04
1.404667e-01 -2.605504e-03
1.404774e-01 -2.015050e-03
1.404799e-01 7.296855e-04
1.404865e-01 7.547399e-04
1.404873e-01 -2.227666e-03
1.404892e-01 -9.158934e-04
1.404981e-01 -6.874942e-04
1.405028e-01 3.432498e-03
1.405037e-01 1.256158e-03
1.405051e-01 2.476688e-04
1.405057e-01 6.711320e-04
1.405129e-01 1.596176e-03
1.405168e-01 -1.311464e-04
1.405219e-01 1.162294e-03
1.405235e-01 1.600630e-03
1.405261e-01 -4.290003e-03
1.405275e-01 2.100159e-03
1.405366e-01 4.314499e-03
1.405407e-01 4.149847e-03
1.405412e-01 4.843405e-03
1.405420e-01 1.744688e-03
1.405445e-01 -2.582442e-03
1.405458e-01 6.091903e-04
1.405488e-01 1.411609e-04
1.405516e-01 -1.356309e-03
1.405538e-01 -1.167902e-03
1.405569e-01 6.069431e-03
1.405575e-01 -2.184842e-03
1.405598e-01 2.564293e-03
1.405603e-01 2.456229e-03
1.405629e-01 -2.459807e-03
1.405655e-01 1.530361e-03
1.405782e-01 1.093019e-03
1.405829e-01 6.675800e-04
1.405905e-01 -1.665500e-04
1.406009e-01 -2.137098e-03
1.406027e-01 6.858078e-04
1.406038e-01 3.316730e-03
1.406181e-01 1.175984e-03
1.406278e-01 3.344841e-03
1.406354e-01 1.367626e-03
1.406368e-01 1.984673e-03
1.406387e-01 8.888436e-04
1.406452e-01 3.713874e-04
1.406554e-01 1.607678e-03
1.406570e-01 7.837803e-04
1.406596e-01 4.523683e-04
1.406600e-01 -1.245343e-03
1.406649e-01 1.072771e-03
1.406680e-01 3.077659e-04
1.406683e-01 -3.069856e-03
1.406684e-01 -7.508257e-04
1.406703e-01 -1.795121e-03
1.406769e-01 -1.711059e-03
1.406848e-01 1.587387e-03
1.406858e-01 -2.467137e-03
1.406864e-01 -4.334448e-04
1.406922e-01 -2.323952e-03
1.406955e-01 -9.783733e-04
1.406988e-01 -5.962298e-04
1.407042e-01 3.581739e-03
1.407064e-01 -4.746305e-03
1.407066e-01 1.330377e-03
1.407084e-01 9.185865e-04
1.407151e-01 1.868072e-03
1.407180e-01 9.060347e-04
1.407180e-01 5.432183e-04
1.407207e-01 -1.551803e-03
1.407207e-01 -1.551803e-03
1.407211e-01 -1.711732e-03
1.407236e-01 -6.823829e-04
1.407237e-01 -5.763818e-05
1.407295e-01 -2.409454e-03
1.407295e-01 -2.409454e-03
1.407303e-01 -6.250169e-04
1.407307e-01 7.194472e-04
1.407318e-01 -1.193654e-03
1.407365e-01 -1.820296e-04
1.407404e-01 5.603544e-03
1.407436e-01 6.759911e-04
1.407672e-01 3.487429e-03
1.407753e-01 -4.631718e-04
1.407777e-01 2.604660e-03
1.407821e-01 1.713280e-03
1.407822e-01 -1.088329e-03
1.407948e-01 -1.108360e-03
1.407959e-01 -1.281188e-03
1.407990e-01 6.672486e-04
1.408017e-01 -3.238290e-03
1.408021e-01 -1.926304e-03
1.408104e-01 -2.269614e-03
1.408231e-01 -2.703620e-03
1.408251e-01 5.358066e-03
1.408257e-01 -1.536743e-03
1.408261e-01 -1.371750e-03
1.408271e-01 1.509557e-03
1.408489e-01 -1.023843e-03
1.408532e-01 -1.209981e-03
1.408601e-01 -1.289486e-03
1.408627e-01 6.600256e-04
1.408660e-01 2.484388e-03
1.408708e-01 -2.837318e-03
1.408748e-01 8.026037e-03
1.408769e-01 1.795822e-03
1.408789e-01 -3.647707e-03
1.408813e-01 -1.414544e-03
1.408816e-01 1.248737e-03
1.408832e-01 -1.569548e-03
1.408892e-01 -6.084142e-04
1.408898e-01 1.177215e-03
1.408937e-01 -3.849877e-03
1.409056e-01 1.772734e-04
1.409085e-01 1.909547e-03
1.409176e-01 8.228389e-05
1.409307e-01 1.687103e-04
1.409333e-01 -3.388207e-03
1.409333e-01 5.549545e-04
1.409350e-01 1.520960e-03
1.409389e-01 -2.023662e-03
1.409404e-01 2.087711e-03
1.409517e-01 -2.048031e-03
1.409573e-01 -3.850178e-03
1.409589e-01 2.271640e-04
1.409610e-01 1.514751e-03
1.409661e-01 -2.734006e-03
1.409663e-01 1.107322e-03
1.409706e-01 1.437472e-03
1.409735e-01 -1.779354e-03
1.409752e-01 3.485711e-03
1.409800e-01 2.422545e-03
1.409883e-01 -1.244894e-03
1.409944e-01 -6.536739e-04
1.409949e-01 -7.705151e-04
1.409977e-01 -1.480712e-03
1.409993e-01 -1.066479e-03
1.410016e-01 -1.645171e-03
1.410137e-01 1.632912e-03
1.410239e-01 1.355332e-03
1.410260e-01 -2.779860e-03
1.410374e-01 6.054909e-05
1.410379e-01 2.607664e-03
1.410398e-01 9.570724e-04
1.410439e-01 5.393379e-04
1.410571e-01 7.267825e-04
1.410580e-01 -1.256181e-03
1.410606e-01 5.813197e-04
1.410650e-01 -1.642176e-03
1.410654e-01 3.944468e-04
1.410718e-01 2.972498e-03
1.410744e-01 6.495343e-04
1.410744e-01 6.495343e-04
1.410810e-01 1.453882e-03
1.410824e-01 -1.480153e-03
1.410843e-01 -5.679430e-05
1.410855e-01 3.194546e-03
1.410855e-01 2.192705e-04
1.410879e-01 -5.356534e-04
1.410959e-01 1.707337e-03
1.411152e-01 6.991206e-03
1.411153e-01 8.213628e-04
1.411184e-01 -1.835336e-03
1.411228e-01 -5.566920e-05
1.411245e-01 3.058496e-04
1.411302e-01 -3.085394e-03
1.411358e-01 -1.388655e-03
1.411379e-01 2.727886e-04
1.411408e-01 6.527578e-03
1.411518e-01 7.772063e-04
1.411547e-01 8.107426e-04
1.411565e-01 4.710777e-03
1.411630e-01 -8.425671e-04
1.411650e-01 1.297184e-04
1.411678e-01 1.380961e-04
1.411698e-01 1.515641e-03
1.411732e-01 8.306332e-05
1.411737e-01 6.857676e-04
1.411745e-01 -1.266446e-03
1.411836e-01 -1.985691e-03
1.411847e-01 2.959478e-03
1.411952e-01 1.414199e-03
1.412082e-01 -1.314900e-04
1.412133e-01 -3.602042e-04
1.412141e-01 -1.104772e-03
1.412166e-01 2.944687e-03
1.412191e-01 1.087240e-03
1.412257e-01 1.877035e-03
1.412258e-01 -2.766162e-04
1.412263e-01 9.545165e-04
1.412270e-01 -7.563006e-04
1.412285e-01 1.662454e-03
1.412382e-01 7.072117e-04
1.412410e-01 2.730050e-03
1.412487e-01 -2.218217e-03
1.412540e-01 3.361285e-04
1.412566e-01 -1.114218e-04
1.412595e-01 1.697019e-03
1.412643e-01 -1.138272e-03
1.412707e-01 1.089156e-03
1.412755e-01 -2.356807e-03
1.412863e-01 -5.041250e-04
1.412876e-01 6.227092e-03
1.412923e-01 -1.734686e-03
1.412953e-01 -3.226294e-03
1.412966e-01 -6.749820e-04
1.412991e-01 -2.716783e-03
1.412996e-01 -2.833879e-03
1.413046e-01 -2.590221e-03
1.413126e-01 -1.895289e-03
1.413149e-01 9.116013e-04
1.413152e-01 -8.902041e-04
1.413278e-01 -6.014737e-04
1.413301e-01 1.727017e-05
1.413328e-01 2.276269e-03
1.413367e-01 1.493385e-03
1.413395e-01 -5.399961e-05
1.413414e-01 1.936725e-03
1.413488e-01 2.922507e-03
1.413572e-01 8.750409e-03
1.413599e-01 9.682562e-04
1.413604e-01 -2.858217e-03
1.413657e-01 -1.458828e-03
1.413678e-01 -1.383221e-03
1.413699e-01 1.320396e-03
1.413856e-01 4.342276e-03
1.413882e-01 1.115985e-03
1.413921e-01 -9.817943e-04
1.413992e-01 -1.196561e-03
1.414127e-01 1.390935e-04
1.414175e-01 -1.015108e-03
1.414182e-01 2.498130e-03
1.414198e-01 -5.179957e-03
1.414243e-01 -3.498698e-03
1.414303e-01 -2.809717e-03
1.414347e-01 8.723978e-04
1.414356e-01 4.576652e-03
1.414380e-01 1.261977e-03
1.414393e-01 8.418392e-04
1.414418e-01 -1.173699e-03
1.414422e-01 6.272434e-04
1.414487e-01 5.212767e-03
1.414513e-01 -6.645423e-04
1.414585e-01 9.953389e-04
1.414641e-01 3.277744e-03
1.414657e-01 -8.409114e-04
1.414703e-01 -2.285951e-04
1.414739e-01 2.522313e-04
1.414915e-01 1.406028e-03
1.414956e-01 -5.601195e-04
1.415040e-01 4.855874e-03
1.415049e-01 -3.682647e-04
1.415105e-01 -1.441726e-03
1.415159e-01 1.610690e-04
1.415188e-01 -1.330269e-03
1.415260e-01 -2.136365e-03
1.415279e-01 -1.825856e-03
1.415294e-01 4.832936e-04
1.415416e-01 -1.682626e-03
1.415521e-01 -2.002611e-03
1.415521e-01 -2.002611e-03
1.415552e-01 4.069364e-03
1.415553e-01 2.277195e-03
1.415585e-01 1.544014e-03
1.415587e-01 -8.115460e-03
1.415591e-01 2.707852e-03
1.415598e-01 1.124766e-03
1.415601e-01 -1.413824e-03
1.415604e-01 -9.466862e-04
1.415627e-01 3.350073e-03
1.415753e-01 5.586622e-04
1.415786e-01 -1.860949e-03
1.415875e-01 1.313841e-03
1.415880e-01 1.359134e-03
1.415916e-01 9.953957e-04
1.415996e-01 -2.455458e-03
1.416026e-01 -4.104193e-04
1.416032e-01 -1.464554e-03
1.416057e-01 1.770435e-03
1.416061e-01 -2.793707e-03
1.416073e-01 -1.901483e-03
1.416113e-01 -4.842250e-04
1.416176e-01 7.583776e-04
1.416181e-01 -6.456405e-05
1.416209e-01 3.947683e-03
1.416257e-01 5.731537e-04
1.416257e-01 5.731537e-04
1.416293e-01 -9.128908e-04
1.416331e-01 3.173038e-03
1.416632e-01 1.945096e-04
1.416653e-01 -3.939792e-04
1.416764e-01 1.154878e-03
1.416768e-01 -2.163330e-04
1.416770e-01 2.585693e-04
1.416827e-01 3.703230e-03
1.416838e-01 3.977359e-05
1.416862e-01 1.244381e-03
1.416874e-01 -2.069593e-03
1.416915e-01 -5.596830e-04
1.416983e-01 -5.125293e-05
1.416994e-01 -1.291041e-04
1.416999e-01 4.827861e-04
1.417051e-01 -1.889296e-03
1.417088e-01 2.256155e-03
1.417105e-01 4.543051e-04
1.417165e-01 -2.603086e-03
1.417181e-01 -4.020734e-03
1.417181e-01 -4.020734e-03
1.417186e-01 -3.653820e-04
1.417261e-01 -8.167360e-04
1.417285e-01 -2.127945e-03
1.417365e-01 -1.081691e-03
1.417380e-01 -5.886878e-04
1.417477e-01 4.659437e-03
1.417482e-01 1.248124e-03
1.417498e-01 2.953361e-03
1.417520e-01 -1.687425e-04
1.417671e-01 -3.249372e-04
1.417693e-01 6.146388e-03
1.417696e-01 -1.950177e-03
1.417873e-01 3.489786e-03
1.417904e-01 1.071479e-04
1.417965e-01 -2.170922e-03
1.417983e-01 3.621965e-03
1.418053e-01 -5.394163e-04
1.418066e-01 -1.773576e-03
1.418193e-01 -1.862526e-04
1.418278e-01 -1.801056e-03
1.418305e-01 7.939850e-04
1.418337e-01 3.691544e-03
1.418483e-01 1.865323e-03
1.418513e-01 -9.568929e-04
1.418553e-01 -3.890771e-03
1.418563e-01 -3.307202e-03
1.418689e-01 -4.995870e-03
1.418761e-01 9.451785e-04
1.418796e-01 5.612171e-03
1.418804e-01 -1.597814e-04
1.418822e-01 1.587484e-03
1.418861e-01 6.428997e-04
1.418881e-01 -1.736419e-03
1.418936e-01 1.130117e-03
1.418945e-01 5.011485e-04
1.418986e-01 -1.004402e-03
1.419024e-01 2.791217e-03
1.419078e-01 6.895225e-04
1.419160e-01 5.601623e-04
1.419187e-01 1.799517e-03
1.419193e-01 -1.622577e-03
1.419264e-01 -7.947946e-04
1.419309e-01 -4.381681e-03
1.419339e-01 2.334539e-06
1.419348e-01 -4.689345e-04
1.419411e-01 -1.864169e-03
1.419461e-01 7.865214e-04
1.419529e-01 3.724445e-03
1.419575e-01 -2.133198e-04
1.419652e-01 -5.331586e-04
1.419684e-01 -2.588260e-03
1.419702e-01 -1.643186e-03
1.419958e-01 7.610226e-04
1.420186e-01 8.094721e-04
1.420249e-01 -1.333859e-03
1.420309e-01 1.899434e-04
1.420329e-01 1.366471e-03
1.420363e-01 1.890990e-03
1.420435e-01 3.454377e-04
1.420480e-01 -1.183847e-03
1.420557e-01 -1.186552e-03
1.420679e-01 -8.987634e-04
1.420737e-01 1.156346e-03
1.420869e-01 4.377455e-04
1.421028e-01 2.302146e-04
1.421031e-01 -4.814517e-04
1.421031e-01 -4.814517e-04
1.421059e-01 -1.322204e-03
1.421086e-01 1.095306e-04
1.421092e-01 -1.999069e-04
1.421105e-01 -2.300246e-03
1.421139e-01 1.753542e-03
1.421142e-01 6.671823e-04
1.421150e-01 1.646856e-03
1.421393e-01 -1.349610e-03
1.421430e-01 -8.477655e-04
1.421496e-01 -2.166451e-03
1.421570e-01 -4.716558e-03
1.421586e-01 1.474690e-03
1.421603e-01 1.490474e-04
1.421764e-01 1.186432e-03
1.421806e-01 5.354867e-05
1.421806e-01 5.354867e-05
1.421895e-01 1.007829e-03
1.422044e-01 1.632115e-03
1.422054e-01 2.036882e-03
1.422055e-01 9.410276e-04
1.422103e-01 -2.124296e-03
1.422108e-01 -3.883162e-04
1.422136e-01 2.121528e-04
1.422189e-01 -2.299034e-03
1.422272e-01 2.131072e-03
1.422317e-01 -2.055030e-03
1.422359e-01 2.142981e-04
1.422440e-01 6.980747e-04
1.422498e-01 -6.911130e-04
1.422538e-01 3.750536e-03
1.422617e-01 -1.347868e-03
1.422660e-01 -6.657810e-04
1.422677e-01 -6.454226e-04
1.422698e-01 1.572657e-04
1.422768e-01 9.778012e-04
1.422901e-01 -4.431748e-03
1.422971e-01 2.245793e-03
1.422980e-01 -1.041767e-03
1.423046e-01 -2.687740e-03
1.423081e-01 2.019812e-03
1.423176e-01 8.187151e-04
1.423216e-01 4.929814e-03
1.423300e-01 1.595307e-03
1.423369e-01 -3.234476e-03
1.423499e-01 -1.017645e-03
1.423516e-01 9.768566e-04
1.423597e-01 -2.602204e-03
1.423618e-01 2.283953e-03
1.423715e-01 -3.369801e-03
1.423761e-01 3.672937e-04
1.423772e-01 2.391888e-03
1.423804e-01 -1.181840e-03
1.423804e-01 -1.181840e-03
1.423805e-01 1.696688e-03
1.423805e-01 1.696688e-03
1.423887e-01 -2.635521e-03
1.423890e-01 1.100066e-03
1.423930e-01 -2.123074e-03
1.424002e-01 -1.321353e-03
1.424085e-01 2.674156e-04
1.424085e-01 2.674156e-04
1.424092e-01 -3.992998e-04
1.424103e-01 1.126727e-03
1.424105e-01 -2.220184e-04
1.424175e-01 4.928980e-04
1.424213e-01 1.245597e-03
1.424219e-01 4.058097e-03
1.424304e-01 -3.907196e-03
1.424376e-01 7.470547e-04
1.424470e-01 7.908676e-03
1.424477e-01 1.409442e-03
1.424559e-01 6.239574e-04
1.424626e-01 -2.827386e-04
1.424784e-01 1.403136e-03
1.424812e-01 -2.318547e-03
1.424827e-01 -6.678504e-04
1.424838e-01 2.518784e-03
1.424906e-01 1.095542e-03
1.425151e-01 2.762543e-03
1.425232e-01 -4.242593e-04
1.425232e-01 -4.242593e-04
1.425233e-01 6.154338e-04
1.425287e-01 7.686346e-05
1.425353e-01 7.194419e-04
1.425376e-01 -6.748086e-04
1.425393e-01 -1.485565e-03
1.425445e-01 3.852442e-04
1.425463e-01 1.225372e-03
1.425463e-01 1.744132e-03
1.425473e-01 -1.877642e-04
1.425619e-01 -3.561022e-04
1.425681e-01 1.330492e-03
1.425715e-01 -1.169830e-03
1.425749e-01 -1.339508e-04
1.425769e-01 2.328690e-03
1.425795e-01 1.467491e-03
1.425806e-01 -3.463991e-03
1.425921e-01 1.804129e-03
1.426004e-01 1.780535e-03
1.426006e-01 5.309246e-03
1.426080e-01 -2.887260e-03
1.426221e-01 6.375156e-03
1.426224e-01 -1.815229e-03
1.426238e-01 9.982473e-04
1.426243e-01 4.403465e-04
1.426244e-01 1.255106e-03
1.426278e-01 1.735483e-03
1.426294e-01 -1.551648e-05
1.426354e-01 1.098307e-03
1.426376e-01 1.466972e-03
1.426409e-01 -6.283071e-04
1.426440e-01 -1.038953e-03
1.426475e-01 -9.781740e-04
1.426492e-01 -3.450539e-03
1.426509e-01 6.087376e-04
1.426527e-01 -1.240267e-03
1.426535e-01 -2.836733e-04
1.426553e-01 -5.744473e-04
1.426647e-01 -9.097730e-04
1.426686e-01 6.403823e-04
1.426832e-01 -9.434189e-04
1.426900e-01 2.036743e-03
1.426905e-01 -1.625453e-04
1.426965e-01 -2.225702e-03
1.427004e-01 -8.331456e-04
1.427031e-01 7.224340e-04
1.427036e-01 3.467180e-03
1.427062e-01 1.522423e-03
1.427323e-01 -9.635346e-04
1.427342e-01 7.453897e-05
1.427348e-01 -6.495614e-05
1.427360e-01 -4.696814e-04
1.427366e-01 4.954224e-03
1.427471e-01 9.677914e-04
1.427477e-01 -2.725477e-03
1.427477e-01 -2.725477e-03
1.427506e-01 7.339526e-04
1.427548e-01 3.120320e-04
1.427647e-01 2.965760e-03
1.427671e-01 2.919046e-03
1.427678e-01 -4.312180e-03
1.427748e-01 5.232800e-03
1.427915e-01 1.787892e-03
1.427940e-01 -3.198591e-03
1.427971e-01 -1.644311e-03
1.427971e-01 -1.644311e-03
1.428072e-01 -2.053255e-03
1.428133e-01 -1.225735e-03
1.428220e-01 -3.292757e-04
1.428233e-01 -8.890005e-04
1.428235e-01 -1.348437e-03
1.428267e-01 7.996358e-04
1.428364e-01 -2.311800e-03
1.428381e-01 -3.124133e-03
1.428389e-01 2.620336e-03
1.428530e-01 -7.256537e-04
1.428575e-01 2.395819e-04
1.428625e-01 3.276114e-03
1.428712e-01 4.288132e-05
1.428720e-01 -1.872639e-03
1.428720e-01 -1.886483e-03
1.428742e-01 -9.463842e-04
1.428803e-01 6.833793e-04
1.428917e-01 1.527690e-03
1.428984e-01 -1.657841e-04
1.429092e-01 -2.815096e-03
1.429145e-01 -6.411895e-04
1.429161e-01 -2.175947e-03
1.429209e-01 8.515564e-04
1.429254e-01 -2.668288e-03
1.429307e-01 4.305830e-03
1.429349e-01 5.187925e-04
1.429358e-01 1.614268e-03
1.429463e-01 3.588049e-04
1.429485e-01 2.370404e-03
1.429647e-01 4.510672e-03
1.429647e-01 4.510672e-03
1.429757e-01 8.976522e-04
1.429870e-01 -2.912998e-03
1.429888e-01 -4.246444e-05
1.429961e-01 -5.340968e-04
1.429992e-01 3.131221e-03
1.430055e-01 -1.567428e-04
1.430074e-01 -2.254647e-03
1.430098e-01 -4.288623e-03
1.430129e-01 -5.164136e-04
1.430199e-01 3.126150e-03
1.430225e-01 -3.669231e-04
1.430356e-01 1.205185e-03
1.430356e-01 -3.583999e-04
1.430381e-01 -1.431968e-03
1.430397e-01 8.584218e-04
1.430475e-01 8.374894e-04
1.430523e-01 -1.387792e-03
1.430572e-01 6.947468e-04
1.430597e-01 -3.022995e-03
1.430693e-01 2.283384e-03
1.430694e-01 -1.938215e-05
1.430774e-01 -5.448113e-03
1.430813e-01 -4.045392e-03
1.430895e-01 -2.718392e-03
1.430925e-01 9.249654e-04
1.430939e-01 4.293700e-03
1.431034e-01 2.651686e-03
1.431072e-01 2.478203e-04
1.431097e-01 -2.406794e-03
1.431103e-01 3.545432e-03
1.431115e-01 -2.249427e-03
1.431124e-01 -1.231390e-03
1.431217e-01 -2.953060e-03
1.431285e-01 3.914273e-03
1.431425e-01 2.260741e-03
1.431498e-01 8.352621e-04
1.431510e-01 1.836985e-03
1.431524e-01 2.129255e-04
1.431562e-01 2.351365e-03
1.431578e-01 -8.831450e-04
1.431609e-01 -1.818319e-04
1.431612e-01 9.749691e-04
1.431647e-01 -1.144771e-03
1.431699e-01 8.121323e-04
1.431753e-01 -1.324537e-03
1.431753e-01 6.729821e-04
1.431803e-01 2.728619e-03
1.431826e-01 -6.088018e-05
1.431879e-01 7.796893e-04
1.431907e-01 1.934863e-03
1.431910e-01 -1.417661e-04
1.431961e-01 -1.956687e-04
1.431969e-01 1.420324e-03
1.431980e-01 -1.744776e-03
1.432003e-01 -6.628565e-04
1.432016e-01 2.675972e-03
1.432060e-01 3.923901e-04
1.432066e-01 -9.711378e-04
1.432071e-01 -3.250788e-03
1.432078e-01 2.638007e-03
1.432078e-01 2.638007e-03
1.432242e-01 3.132938e-03
1.432301e-01 1.011058e-03
1.432367e-01 2.816671e-03
1.432394e-01 8.224739e-04
1.432403e-01 2.791180e-03
1.432420e-01 1.812915e-03
1.432430e-01 -8.448937e-04
1.432520e-01 -9.292091e-04
1.432682e-01 2.392378e-03
1.432689e-01 1.317250e-03
1.432748e-01 7.740069e-04
1.432781e-01 3.354401e-04
1.432924e-01 -1.654004e-03
1.432941e-01 -1.145310e-03
1.432969e-01 1.008399e-03
1.433072e-01 -6.487443e-04
1.433104e-01 3.824194e-03
1.433143e-01 1.890752e-03
1.433145e-01 3.087096e-03
1.433197e-01 -4.033213e-04
1.433221e-01 -1.871281e-03
1.433221e-01 -1.871281e-03
1.433264e-01 -4.179931e-03
1.433319e-01 1.189288e-03
1.433372e-01 9.418808e-04
1.433449e-01 -2.454438e-04
1.433450e-01 7.976410e-04
1.433491e-01 -5.776176e-04
1.433576e-01 1.382325e-03
1.433590e-01 -1.161208e-03
1.433655e-01 3.918353e-04
1.433680e-01 -7.961825e-04
1.433742e-01 6.970319e-04
1.434085e-01 9.411007e-04
1.434086e-01 2.374012e-03
1.434167e-01 -1.230022e-03
1.434321e-01 -4.134790e-04
1.434330e-01 -1.752377e-03
1.434336e-01 -1.523366e-03
1.434449e-01 -3.437609e-04
1.434527e-01 3.541067e-03
1.434551e-01 -5.100868e-03
1.434551e-01 -5.100868e-03
1.434603e-01 -2.147895e-03
1.434626e-01 -1.424607e-05
1.434633e-01 -1.489718e-03
1.434652e-01 1.371721e-03
1.434702e-01 1.252015e-03
1.434821e-01 7.376972e-04
1.434832e-01 -5.160541e-04
1.434847e-01 1.691350e-03
1.434897e-01 1.911717e-03
1.434929e-01 -1.042012e-03
1.434936e-01 -5.394401e-04
1.434953e-01 -2.525949e-03
1.435019e-01 -3.829089e-04
1.435029e-01 -1.078407e-03
1.435128e-01 -7.064991e-04
1.435168e-01 -5.948644e-05
1.435197e-01 2.347701e-03
1.435230e-01 2.287283e-03
1.435240e-01 -5.141708e-04
1.435305e-01 5.501409e-03
1.435376e-01 5.195636e-03
1.435380e-01 -4.348358e-04
1.435457e-01 2.209454e-03
1.435467e-01 -1.735343e-03
1.435521e-01 8.982884e-04
1.435594e-01 6.307893e-04
1.435648e-01 4.342373e-03
1.435710e-01 -3.571431e-04
1.435730e-01 -2.735164e-03
1.435733e-01 4.808441e-03
1.435781e-01 1.732491e-04
1.435791e-01 -7.853891e-04
1.435928e-01 9.975712e-04
1.435928e-01 -1.230759e-03
1.435933e-01 3.162908e-03
1.435959e-01 -2.491862e-04
1.435992e-01 -2.082628e-03
1.436059e-01 1.251106e-03
1.436063e-01 2.582175e-03
1.436211e-01 3.467205e-03
1.436255e-01 3.932282e-03
1.436292e-01 1.873842e-03
1.436346e-01 -1.264002e-03
1.436416e-01 -2.872820e-03
1.436434e-01 1.070071e-03
1.436475e-01 -3.263094e-03
1.436481e-01 2.298882e-03
1.436511e-01 1.829699e-04
1.436516e-01 -3.022668e-04
1.436524e-01 7.158517e-04
1.436631e-01 -4.475642e-03
1.436679e-01 1.312174e-03
1.436765e-01 1.916680e-03
1.436860e-01 2.892634e-03
1.436908e-01 -8.551411e-04
1.436923e-01 -4.421242e-03
1.436962e-01 -1.415271e-03
1.436994e-01 -1.256731e-03
1.437053e-01 -1.727674e-03
1.437219e-01 1.273459e-04
1.437227e-01 -7.623061e-04
1.437241e-01 4.997919e-04
1.437254e-01 -6.068941e-05
1.437359e-01 -8.714671e-04
1.437490e-01 1.040354e-04
1.437615e-01 8.652143e-04
1.437635e-01 3.799144e-04
1.437658e-01 2.786671e-04
1.437682e-01 -8.606049e-04
1.437707e-01 1.191537e-03
1.437778e-01 4.767892e-04
1.437780e-01 -1.169125e-03
1.437820e-01 -2.576028e-03
1.437825e-01 -3.206103e-03
1.437825e-01 -3.206103e-03
1.437861e-01 2.046970e-03
1.437869e-01 2.488370e-03
1.437924e-01 1.739010e-03
1.437958e-01 8.746939e-04
1.437966e-01 4.553385e-04
1.437966e-01 1.572918e-04
1.437983e-01 1.146746e-03
1.438083e-01 2.857895e-03
1.438133e-01 1.376921e-03
1.438192e-01 -1.082873e-03
1.438207e-01 8.035038e-04
1.438239e-01 -4.289062e-03
1.438282e-01 2.758813e-03
1.438323e-01 1.503668e-03
1.438340e-01 -1.743776e-03
1.438350e-01 -5.358936e-04
1.438478e-01 -2.118782e-03
1.438538e-01 1.001368e-04
1.438573e-01 1.270280e-03
1.438640e-01 8.689142e-04
1.438773e-01 9.355961e-04
1.438864e-01 6.537154e-03
1.438865e-01 -1.610874e-03
1.438938e-01 2.024503e-03
1.438954e-01 7.104101e-04
1.439167e-01 -1.669190e-03
1.439220e-01 -4.542561e-03
1.439262e-01 -9.868195e-04
1.439264e-01 -2.086417e-03
1.439271e-01 -4.398468e-04
1.439428e-01 1.406214e-04
1.439473e-01 3.070535e-04
1.439570e-01 6.824129e-04
1.439577e-01 3.534706e-03
1.439611e-01 7.000089e-04
1.439751e-01 -1.501316e-03
1.439780e-01 1.068097e-04
1.439850e-01 4.619296e-03
1.439989e-01 -4.075336e-04
1.440050e-01 -7.564095e-04
1.440094e-01 -2.068400e-03
1.440094e-01 -2.068400e-03
1.440103e-01 7.964249e-04
1.440129e-01 1.275856e-03
1.440146e-01 1.812617e-03
1.440163e-01 -6.019617e-04
1.440191e-01 1.755509e-03
1.440213e-01 1.553846e-03
1.440225e-01 6.568471e-03
1.440285e-01 1.101811e-03
1.440306e-01 3.061367e-04
1.440313e-01 4.540686e-04
1.440321e-01 4.564232e-04
1.440344e-01 -1.196516e-04
1.440407e-01 -1.809476e-03
1.440447e-01 -1.568273e-03
1.440512e-01 -1.711065e-03
1.440561e-01 -1.421086e-04
1.440576e-01 1.418055e-04
1.440667e-01 -1.002594e-03
1.440713e-01 1.712829e-03
1.440742e-01 2.334948e-03
1.440769e-01 -1.011830e-03
1.440778e-01 9.202970e-04
1.440796e-01 -4.532361e-03
1.440822e-01 -2.874238e-03
1.440831e-01 3.114952e-04
1.440837e-01 3.152069e-03
1.440908e-01 1.489346e-03
1.440988e-01 2.528522e-05
1.441001e-01 1.005350e-03
1.441001e-01 1.005350e-03
1.441021e-01 -8.709576e-04
1.441032e-01 -1.120643e-03
1.441118e-01 -1.160488e-03
1.441124e-01 2.831334e-03
1.441145e-01 3.576287e-04
1.441211e-01 4.771970e-03
1.441211e-01 4.771970e-03
1.441213e-01 6.224152e-04
1.441234e-01 1.686895e-03
1.441236e-01 9.446310e-04
1.441241e-01 1.452501e-03
1.441324e-01 -1.679052e-03
1.441381e-01 -7.983512e-04
1.441404e-01 -1.505890e-03
1.441423e-01 5.437289e-04
1.441461e-01 -2.133018e-03
1.441476e-01 1.358796e-03
1.441544e-01 1.931197e-03
1.441624e-01 1.737148e-03
1.441694e-01 -2.450905e-05
1.441716e-01 1.608728e-03
1.441734e-01 -5.935962e-04
1.441756e-01 5.748408e-03
1.441786e-01 -9.738572e-04
1.441797e-01 -1.714098e-03
1.441799e-01 -7.609221e-04
1.441823e-01 2.199946e-03
1.441824e-01 1.453851e-03
1.441948e-01 9.092604e-04
1.441956e-01 8.259347e-04
1.442065e-01 -1.640530e-03
1.442118e-01 -2.699124e-03
1.442232e-01 5.534113e-04
1.442276e-01 2.152201e-03
1.442299e-01 -2.621955e-03
1.442305e-01 4.952244e-03
1.442324e-01 7.414421e-03
1.442343e-01 3.692766e-03
1.442343e-01 6.048206e-04
1.442356e-01 7.907355e-04
1.442393e-01 -1.751425e-03
1.442427e-01 2.157696e-03
1.442477e-01 2.200516e-03
1.442599e-01 2.938762e-03
1.442655e-01 -1.196781e-03
1.442698e-01 3.924139e-04
1.442719e-01 1.868479e-03
1.442738e-01 4.722463e-04
1.442767e-01 3.330387e-03
1.442888e-01 8.622256e-04
1.442916e-01 -1.855587e-03
1.442932e-01 3.000085e-03
1.442932e-01 3.000085e-03
1.442947e-01 -2.836503e-03
1.442957e-01 6.199743e-04
1.443016e-01 -4.237913e-04
1.443064e-01 -2.746020e-03
1.443072e-01 8.703766e-04
1.443109e-01 4.321556e-03
1.443120e-01 2.980208e-03
1.443308e-01 2.038756e-03
1.443325e-01 3.083508e-03
1.443333e-01 2.397006e-03
1.443382e-01 1.797524e-03
1.443531e-01 -9.533517e-04
1.443543e-01 1.712519e-03
1.443552e-01 1.026073e-05
1.443626e-01 -1.572989e-04
1.443684e-01 3.054798e-03
1.443723e-01 -2.342537e-03
1.443743e-01 3.195140e-03
1.443748e-01 -1.414974e-03
1.443769e-01 3.992283e-04
1.443789e-01 -1.708162e-03
1.443821e-01 2.237849e-03
1.444019e-01 -1.742315e-03
1.444063e-01 -8.110238e-04
1.444142e-01 -1.738634e-03
1.444238e-01 4.189129e-04
1.444399e-01 -1.827276e-03
1.444428e-01 1.143193e-03
1.444475e-01 1.187056e-03
1.444510e-01 -6.452402e-03
1.444510e-01 -6.452402e-03
1.444515e-01 -3.534543e-04
1.444563e-01 -4.944648e-04
1.444584e-01 7.389500e-05
1.444601e-01 1.678292e-03
1.444619e-01 3.084699e-03
1.444683e-01 4.670461e-03
1.444687e-01 4.623455e-04
1.444687e-01 1.019615e-03
1.444715e-01 -1.601120e-04
1.444755e-01 3.121126e-03
1.444762e-01 2.719575e-04
1.444828e-01 1.372179e-03
1.444866e-01 2.181480e-04
1.444992e-01 2.960058e-04
1.445016e-01 6.438647e-04
1.445055e-01 -2.180940e-03
1.445132e-01 -3.549801e-03
1.445135e-01 8.459983e-04
1.445154e-01 -1.613804e-03
1.445156e-01 -8.448671e-04
1.445160e-01 -1.254651e-03
1.445258e-01 8.654075e-05
1.445267e-01 1.837685e-03
1.445346e-01 -2.135775e-03
1.445363e-01 9.421159e-04
1.445498e-01 -1.503767e-03
1.445554e-01 9.957825e-04
1.445590e-01 2.640316e-03
1.445629e-01 -1.865376e-03
1.445711e-01 3.352080e-03
1.445756e-01 -9.159160e-04
1.445781e-01 9.232329e-05
1.445816e-01 1.860789e-03
1.445832e-01 2.219821e-03
1.445836e-01 -2.095431e-03
1.445842e-01 2.905963e-03
1.445918e-01 1.638002e-04
1.445946e-01 3.861025e-04
1.445962e-01 9.120428e-05
1.446017e-01 1.884518e-03
1.446146e-01 1.251906e-03
1.446182e-01 4.488039e-03
1.446343e-01 2.354000e-03
1.446365e-01 -1.243928e-03
1.446377e-01 -1.119580e-03
1.446379e-01 1.070536e-03
1.446469e-01 1.420864e-03
1.446483e-01 1.221355e-03
1.446517e-01 1.878369e-03
1.446543e-01 -1.862152e-03
1.446590e-01 1.710462e-03
1.446623e-01 -1.788722e-03
1.446630e-01 -2.347939e-03
1.446656e-01 2.846398e-03
1.446663e-01 -1.343895e-03
1.446739e-01 -2.567796e-05
1.446742e-01 1.661269e-03
1.446759e-01 -4.952468e-04
1.446784e-01 -6.003195e-04
1.446860e-01 -1.194850e-04
1.446890e-01 1.489325e-03
1.446906e-01 -6.542686e-04
1.446916e-01 -9.686047e-04
1.446920e-01 6.479608e-04
1.446947e-01 4.943703e-03
1.447010e-01 -1.850732e-03
1.447029e-01 1.870804e-03
1.447052e-01 -1.296926e-03
1.447099e-01 4.867666e-05
1.447139e-01 6.373821e-04
1.447172e-01 4.575291e-04
1.447172e-01 2.005627e-03
1.447329e-01 3.021344e-03
1.447367e-01 7.564838e-04
1.447367e-01 8.179127e-03
1.447394e-01 -2.163460e-03
1.447411e-01 1.401917e-03
1.447444e-01 -2.093402e-03
1.447486e-01 3.910460e-04
1.447516e-01 -9.757096e-04
1.447585e-01 -2.274002e-03
1.447666e-01 -1.738685e-03
1.447679e-01 -1.315250e-03
1.447713e-01 -2.330102e-03
1.447733e-01 9.724939e-04
1.447809e-01 1.156259e-03
1.447840e-01 2.123738e-03
1.447991e-01 6.483105e-04
1.448049e-01 4.101989e-03
1.448071e-01 -6.769038e-04
1.448098e-01 3.957744e-03
1.448101e-01 1.586415e-03
1.448126e-01 9.525517e-04
1.448246e-01 1.995770e-03
1.448296e-01 1.500855e-03
1.448307e-01 -1.307137e-03
1.448349e-01 -1.553871e-03
1.448368e-01 3.231905e-03
1.448409e-01 3.564343e-03
1.448444e-01 -6.299281e-04
1.448446e-01 7.627051e-04
1.448527e-01 1.073030e-03
1.448609e-01 -2.557546e-03
1.448663e-01 -1.721376e-03
1.448672e-01 2.896355e-03
1.448748e-01 3.776402e-03
1.448895e-01 -1.187910e-03
1.448923e-01 1.009685e-03
1.448952e-01 1.321038e-03
1.449055e-01 1.032685e-03
1.449218e-01 9.825214e-04
1.449271e-01 -2.067844e-03
1.449273e-01 -9.403563e-04
1.449298e-01 8.446119e-04
1.449298e-01 -8.390519e-04
1.449364e-01 -1.647948e-04
1.449388e-01 5.170130e-03
1.449390e-01 4.978479e-04
1.449404e-01 3.992201e-03
1.449408e-01 -6.194371e-04
1.449431e-01 1.162776e-03
1.449459e-01 4.678658e-04
1.449487e-01 -2.278880e-03
1.449540e-01 8.693476e-06
1.449602e-01 -3.952871e-04
1.449620e-01 -1.596867e-04
1.449683e-01 -2.489297e-03
1.449740e-01 4.042252e-04
1.449791e-01 5.627668e-04
1.449831e-01 1.874035e-04
1.449875e-01 -3.114162e-04
1.449878e-01 9.677447e-05
1.450130e-01 -2.393546e-03
1.450141e-01 -5.681426e-04
1.450158e-01 1.273667e-03
1.450165e-01 -1.485675e-03
1.450189e-01 -1.619986e-03
1.450230e-01 -1.593020e-03
1.450359e-01 -6.456491e-04
1.450450e-01 1.996588e-03
1.450466e-01 1.114876e-03
1.450481e-01 -3.698167e-04
1.450507e-01 1.498501e-03
1.450601e-01 4.492163e-04
1.450606e-01 1.393272e-03
1.450606e-01 1.393272e-03
1.450700e-01 5.660889e-04
1.450777e-01 7.360787e-04
1.450863e-01 4.124692e-04
1.450868e-01 7.088839e-04
1.450984e-01 -1.272806e-03
1.451076e-01 4.541013e-03
1.451132e-01 7.947511e-04
1.451176e-01 -3.771764e-04
1.451176e-01 -3.771764e-04
1.451199e-01 2.791153e-03
1.451235e-01 1.477461e-03
1.451251e-01 8.476167e-04
1.451300e-01 -3.754640e-04
1.451313e-01 1.528958e-03
1.451328e-01 1.321935e-03
1.451344e-01 8.974417e-04
1.451419e-01 1.687915e-03
1.451480e-01 -2.280635e-03
1.451488e-01 2.842538e-03
1.451509e-01 3.623273e-03
1.451630e-01 -7.131828e-05
1.451697e-01 9.665744e-03
1.451708e-01 2.460238e-03
1.451727e-01 8.909013e-04
1.451791e-01 1.582255e-03
1.451791e-01 1.582255e-03
1.451798e-01 3.353740e-04
1.451799e-01 1.004166e-03
1.451828e-01 -6.058076e-05
1.451854e-01 -1.623024e-03
1.451871e-01 -3.016390e-03
1.451896e-01 3.390346e-03
1.451900e-01 5.883009e-04
1.451903e-01 2.536569e-03
1.451960e-01 2.711016e-03
1.452142e-01 -5.388089e-04
1.452147e-01 -1.030878e-03
1.452151e-01 -4.990828e-03
1.452231e-01 3.205564e-03
1.452307e-01 3.867469e-03
1.452325e-01 9.181859e-04
1.452351e-01 3.271320e-03
1.452401e-01 -3.003327e-03
1.452458e-01 -4.843110e-03
1.452463e-01 1.061648e-03
1.452518e-01 -2.178826e-03
1.452559e-01 3.845106e-03
1.452654e-01 2.622734e-03
1.452791e-01 2.494338e-05
1.452935e-01 1.277369e-03
1.452939e-01 -1.730114e-03
1.452964e-01 6.194401e-04
1.452968e-01 -1.693396e-04
1.453034e-01 4.645449e-04
1.453150e-01 3.656852e-04
1.453221e-01 1.312339e-03
1.453314e-01 -1.972959e-03
1.453361e-01 -1.065959e-03
1.453379e-01 -2.400682e-03
1.453406e-01 -2.764177e-05
1.453535e-01 5.225772e-03
1.453599e-01 3.522917e-03
1.453608e-01 3.245769e-03
1.453648e-01 7.122381e-04
1.453651e-01 5.372878e-05
1.453656e-01 1.165805e-03
1.453656e-01 1.165805e-03
1.453678e-01 1.200572e-03
1.453687e-01 -1.212038e-03
1.453733e-01 -2.914432e-03
1.453755e-01 2.787938e-04
1.453779e-01 -1.371713e-03
1.453830e-01 4.688180e-03
1.453850e-01 5.609135e-04
1.453860e-01 1.139047e-03
1.453954e-01 4.445212e-03
1.454004e-01 7.399769e-04
1.454025e-01 9.975096e-04
1.454142e-01 1.578568e-03
1.454152e-01 -5.567818e-04
1.454383e-01 -7.583402e-04
1.454399e-01 1.296255e-03
1.454413e-01 -4.832674e-04
1.454588e-01 1.322449e-03
1.454590e-01 2.498741e-03
1.454597e-01 4.540974e-03
1.454630e-01 -1.128801e-03
1.454641e-01 3.780240e-03
1.454658e-01 -1.578999e-04
1.454781e-01 8.683375e-04
1.454795e-01 6.726914e-04
1.454818e-01 3.084285e-05
1.454927e-01 -5.637117e-03
1.454947e-01 -2.223419e-03
1.455026e-01 -1.279572e-03
1.455150e-01 -3.579079e-04
1.455159e-01 -3.399183e-03
1.455195e-01 -5.244944e-04
1.455231e-01 7.571152e-04
1.455247e-01 8.884981e-04
1.455317e-01 -1.936993e-03
1.455336e-01 1.914847e-03
1.455377e-01 -3.728132e-04
1.455398e-01 8.724957e-04
1.455426e-01 7.926367e-04
1.455451e-01 -7.163129e-04
1.455671e-01 -4.355925e-03
1.455736e-01 6.412219e-03
1.455739e-01 -1.132063e-04
1.455831e-01 5.328446e-03
1.455884e-01 4.231019e-04
1.455964e-01 7.288637e-04
1.456002e-01 -7.775363e-04
1.456043e-01 8.775659e-04
1.456216e-01 9.925496e-04
1.456233e-01 1.830630e-03
1.456237e-01 -1.880804e-03
1.456376e-01 -4.369426e-04
1.456396e-01 1.257485e-03
1.456400e-01 4.440729e-04
1.456413e-01 3.034760e-03
1.456440e-01 1.700119e-03
1.456507e-01 -9.485512e-04
1.456590e-01 8.264568e-04
1.456659e-01 -2.032658e-03
1.456776e-01 7.313403e-04
1.456890e-01 5.101111e-04
1.456916e-01 1.612738e-03
1.456920e-01 3.569148e-03
1.456923e-01 -3.464202e-04
1.456961e-01 -7.891488e-04
1.456978e-01 2.699505e-03
1.456990e-01 1.012989e-03
1.457065e-01 -1.673880e-04
1.457077e-01 -1.661796e-03
1.457139e-01 -1.277824e-03
1.457139e-01 -1.277824e-03
1.457155e-01 -4.243539e-03
1.457198e-01 -2.828701e-03
1.457223e-01 -1.884894e-03
1.457233e-01 1.126110e-03
1.457285e-01 -2.812591e-03
1.457292e-01 3.512404e-03
1.457335e-01 1.682827e-03
1.457362e-01 -1.493439e-04
1.457389e-01 5.371092e-04
1.457390e-01 7.664936e-04
1.457519e-01 3.787041e-04
1.457558e-01 2.030755e-03
1.457613e-01 6.710675e-04
1.457637e-01 -4.568555e-03
1.457689e-01 1.833520e-03
1.457704e-01 8.729167e-04
1.457704e-01 -1.161750e-03
1.457782e-01 5.507292e-04
1.457911e-01 -4.749414e-04
1.457925e-01 2.308599e-03
1.457961e-01 3.078911e-04
1.457963e-01 9.723825e-04
1.457972e-01 3.917958e-03
1.457974e-01 -3.000054e-03
1.458000e-01 1.585492e-03
1.458036e-01 4.795977e-03
1.458037e-01 -3.922457e-04
1.458068e-01 1.653600e-03
1.458079e-01 1.023884e-04
1.458195e-01 7.723253e-04
1.458202e-01 6.211852e-03
1.458277e-01 -1.048479e-04
1.458383e-01 8.636948e-04
1.458393e-01 -3.058914e-03
1.458514e-01 2.114532e-03
1.458542e-01 9.152486e-04
1.458546e-01 -9.652836e-04
1.458625e-01 -2.690146e-03
1.458654e-01 3.417751e-03
1.458699e-01 -1.767303e-03
1.458760e-01 1.805045e-03
1.458807e-01 1.730098e-03
1.458848e-01 9.358131e-04
1.458850e-01 -7.680287e-04
1.458857e-01 7.252843e-04
1.458866e-01 4.736870e-03
1.458952e-01 1.301597e-04
1.459017e-01 -1.127765e-03
1.459061e-01 -3.485378e-04
1.459161e-01 1.693830e-03
1.459184e-01 1.727798e-03
1.459184e-01 3.953793e-03
1.459398e-01 -7.712792e-04
1.459427e-01 2.521773e-04
1.459541e-01 -3.160833e-04
1.459568e-01 1.111784e-03
1.459600e-01 1.455743e-03
1.459630e-01 2.039859e-03
1.459714e-01 1.990665e-03
1.459748e-01 1.841825e-04
1.459799e-01 1.522192e-03
1.459872e-01 -4.299845e-04
1.459924e-01 -4.203745e-04
1.459992e-01 -1.566158e-03
1.459992e-01 -3.333005e-03
1.459994e-01 -4.435602e-03
1.460071e-01 1.341031e-04
1.460230e-01 1.958257e-03
1.460297e-01 -1.099580e-03
1.460448e-01 2.478705e-03
1.460475e-01 -3.322457e-03
1.460493e-01 -1.010381e-03
1.460569e-01 2.080487e-03
1.460608e-01 2.949792e-03
1.460624e-01 2.009783e-03
1.460729e-01 -8.317103e-04
1.460736e-01 -3.319550e-03
1.460789e-01 -2.241114e-03
1.460791e-01 7.716522e-04
1.460791e-01 7.716522e-04
1.460823e-01 3.091421e-03
1.460908e-01 9.322985e-04
1.460935e-01 8.996662e-04
1.461000e-01 -8.542872e-04
1.461008e-01 1.319671e-03
1.461008e-01 1.319671e-03
1.461065e-01 -2.594212e-04
1.461094e-01 4.867860e-04
1.461303e-01 -3.808616e-03
1.461304e-01 9.418032e-04
1.461332e-01 -5.446898e-04
1.461377e-01 6.981311e-05
1.461472e-01 8.752692e-04
1.461476e-01 3.108001e-03
1.461532e-01 -1.607772e-03
1.461541e-01 3.689783e-04
1.461579e-01 1.565586e-03
1.461595e-01 1.498055e-03
1.461605e-01 -2.644205e-03
1.461642e-01 3.303972e-03
1.461648e-01 1.470193e-04
1.461734e-01 -1.114406e-04
1.461797e-01 8.644534e-04
1.461849e-01 -3.554164e-04
1.461856e-01 2.418518e-04
1.461920e-01 1.686128e-03
1.461936e-01 1.784375e-03
1.461936e-01 1.784375e-03
1.461964e-01 -5.279115e-04
1.462169e-01 -4.076842e-04
1.462331e-01 2.601600e-03
1.462366e-01 -1.773308e-03
1.462379e-01 -3.031228e-03
1.462453e-01 -7.470130e-04
1.462455e-01 -4.239288e-04
1.462523e-01 7.088884e-04
1.462603e-01 7.814065e-04
1.462713e-01 9.852587e-04
1.462798e-01 -1.141887e-04
1.462808e-01 -2.931876e-04
1.462918e-01 5.383514e-04
1.462936e-01 -7.627752e-04
1.462953e-01 8.504313e-04
1.462994e-01 7.701809e-04
1.463013e-01 -1.491479e-03
1.463035e-01 2.420863e-04
1.463107e-01 4.681065e-03
1.463107e-01 4.681065e-03
1.463112e-01 -2.533284e-03
1.463192e-01 6.609442e-04
1.463206e-01 1.481714e-03
1.463387e-01 1.831864e-03
1.463495e-01 2.474023e-03
1.463587e-01 -6.351293e-03
1.463644e-01 6.410124e-04
1.463647e-01 -2.721178e-03
1.463709e-01 3.990532e-03
1.463730e-01 -9.270388e-06
1.463749e-01 -8.618061e-04
1.463762e-01 -1.674770e-03
1.463803e-01 1.698777e-03
1.463815e-01 -1.919964e-03
1.463873e-01 -6.267280e-04
1.463875e-01 -2.121030e-03
1.463921e-01 -1.711213e-03
1.463942e-01 1.228439e-03
1.464037e-01 2.771850e-03
1.464056e-01 7.677253e-04
1.464282e-01 5.370690e-04
1.464353e-01 2.975436e-04
1.464527e-01 6.277959e-03
1.464554e-01 -5.979971e-04
1.464613e-01 1.215112e-03
1.464655e-01 3.177566e-03
1.464657e-01 1.384793e-03
1.464665e-01 2.211569e-03
1.464675e-01 1.807771e-03
1.464687e-01 -2.194959e-03
1.464690e-01 -2.575036e-03
1.464695e-01 4.636127e-03
1.464697e-01 7.480164e-04
1.464727e-01 -1.446177e-03
1.464781e-01 2.090516e-03
1.464821e-01 3.332055e-03
1.464870e-01 3.713564e-03
1.464913e-01 1.244457e-04
1.464920e-01 2.482839e-03
1.464932e-01 1.329010e-03
1.464960e-01 -3.331927e-03
1.465106e-01 -4.337489e-04
1.465115e-01 8.012142e-04
1.465132e-01 4.677642e-03
1.465168e-01 1.380102e-03
1.465187e-01 9.315142e-04
1.465233e-01 2.476218e-03
1.465233e-01 7.031199e-04
1.465247e-01 -2.521447e-03
1.465283e-01 1.557995e-03
1.465321e-01 3.115481e-03
1.465358e-01 -3.996904e-03
1.465384e-01 -3.769844e-04
1.465392e-01 -2.619763e-03
1.465417e-01 -2.509279e-03
1.465424e-01 1.697731e-03
1.465536e-01 2.620905e-03
1.465600e-01 2.705135e-03
1.465602e-01 1.426927e-03
1.465627e-01 4.847128e-03
1.465633e-01 5.128915e-03
1.465659e-01 9.330110e-04
1.465722e-01 3.181783e-04
1.465735e-01 2.914243e-03
1.465745e-01 1.204385e-03
1.465807e-01 -9.957860e-04
1.465838e-01 9.283254e-04
1.465861e-01 2.170784e-03
1.465894e-01 4.776321e-04
1.465914e-01 5.521290e-04
1.465992e-01 6.417399e-04
1.466011e-01 -1.734645e-03
1.466020e-01 4.985310e-04
1.466115e-01 1.392890e-04
1.466235e-01 -2.079985e-03
1.466257e-01 -8.073129e-04
1.466432e-01 -1.432992e-04
1.466503e-01 -3.353416e-03
1.466538e-01 4.188001e-04
1.466605e-01 3.308903e-03
1.466635e-01 -2.146652e-03
1.466658e-01 3.248568e-04
1.466686e-01 -2.781583e-03
1.466769e-01 4.629519e-03
1.466856e-01 7.618842e-04
1.466935e-01 3.663539e-03
1.467119e-01 3.639391e-04
1.467121e-01 1.160120e-03
1.467153e-01 -2.206108e-03
1.467190e-01 1.228120e-03
1.467218e-01 -1.856448e-04
1.467253e-01 -9.168526e-04
1.467263e-01 1.689203e-03
1.467273e-01 2.450073e-03
1.467305e-01 2.529629e-03
1.467333e-01 -2.835708e-03
1.467441e-01 4.805306e-03
1.467482e-01 6.491619e-04
1.467524e-01 4.078823e-04
1.467601e-01 7.336252e-04
1.467710e-01 1.197344e-04
1.467719e-01 4.900785e-03
1.467769e-01 -2.216279e-03
1.467784e-01 2.239681e-03
1.467828e-01 4.129782e-04
1.467878e-01 -6.713325e-04
1.467893e-01 -1.149265e-03
1.467893e-01 -1.149265e-03
1.467911e-01 -1.123941e-03
1.467961e-01 -3.013445e-03
1.468000e-01 -5.908426e-05
1.468023e-01 -5.073944e-04
1.468038e-01 -1.656391e-03
1.468039e-01 -7.029589e-04
1.468220e-01 -1.777421e-03
1.468264e-01 1.231003e-03
1.468269e-01 1.946999e-03
1.468300e-01 -5.053710e-04
1.468316e-01 2.965125e-04
1.468438e-01 -3.079031e-03
1.468469e-01 6.964958e-05
1.468551e-01 3.871317e-04
1.468684e-01 -1.727502e-03
1.468697e-01 5.382239e-03
1.468784e-01 -7.407119e-04
1.468807e-01 -2.430207e-03
1.468807e-01 -2.430207e-03
1.468818e-01 3.221910e-03
1.468825e-01 -2.712982e-04
1.468843e-01 -2.188647e-03
1.468955e-01 7.039465e-04
1.469008e-01 -5.955441e-04
1.469029e-01 4.383382e-03
1.469090e-01 -2.367240e-04
1.469090e-01 2.006782e-03
1.469175e-01 -1.318603e-03
1.469219e-01 -1.445368e-05
1.469249e-01 -2.871492e-03
1.469254e-01 2.472577e-03
1.469254e-01 2.472577e-03
1.469314e-01 9.889848e-04
1.469332e-01 2.190027e-03
1.469348e-01 -4.078957e-03
1.469420e-01 7.151320e-03
1.469434e-01 -9.741035e-04
1.469479e-01 7.797268e-03
1.469527e-01 1.007203e-03
1.469560e-01 -1.406969e-03
1.469599e-01 4.204124e-03
1.469665e-01 2.251396e-03
1.469675e-01 3.945841e-03
1.469773e-01 8.412056e-04
1.469774e-01 1.171993e-03
1.469781e-01 1.150475e-03
1.469811e-01 2.221744e-03
1.469822e-01 -3.734014e-04
1.469822e-01 -3.734014e-04
1.469822e-01 -2.873957e-03
1.469898e-01 -1.744553e-03
1.469919e-01 -1.717531e-03
1.469951e-01 5.834114e-04
1.469990e-01 -2.272975e-03
1.469995e-01 -1.472396e-03
1.469996e-01 -7.665340e-04
1.470001e-01 -2.361746e-03
1.470019e-01 5.088523e-04
1.470263e-01 1.194959e-03
1.470263e-01 1.194959e-03
1.470286e-01 7.251735e-03
1.470311e-01 1.457686e-03
1.470343e-01 -3.495846e-03
1.470388e-01 1.082529e-03
1.470413e-01 -2.765575e-03
1.470447e-01 -4.409807e-04
1.470455e-01 9.610289e-04
1.470494e-01 6.645195e-03
1.470556e-01 4.081075e-04
1.470625e-01 -3.268102e-03
1.470658e-01 1.163662e-03
1.470710e-01 1.969503e-04
1.470744e-01 -2.223148e-05
1.470977e-01 -5.848808e-04
1.471104e-01 -5.467912e-04
1.471177e-01 -2.558520e-03
1.471263e-01 -8.591034e-04
1.471287e-01 6.937310e-04
1.471296e-01 1.802339e-03
1.471296e-01 1.802339e-03
1.471316e-01 7.800826e-04
1.471375e-01 -9.536625e-05
1.471460e-01 2.596669e-03
1.471604e-01 2.777598e-03
1.471633e-01 3.630936e-03
1.471673e-01 2.732733e-03
1.471770e-01 9.565675e-04
1.471771e-01 8.053473e-04
1.471772e-01 1.716437e-03
1.471785e-01 -1.274577e-03
1.471815e-01 4.183938e-04
1.471901e-01 -3.728465e-03
1.472098e-01 -1.761290e-03
1.472108e-01 -6.505120e-04
1.472113e-01 3.327037e-04
1.472148e-01 1.257978e-05
1.472192e-01 3.709866e-03
1.472258e-01 -2.242945e-03
1.472289e-01 3.799933e-03
1.472382e-01 1.529746e-03
1.472382e-01 1.529746e-03
1.472421e-01 1.925863e-03
1.472458e-01 1.066256e-03
1.472468e-01 1.755861e-04
1.472478e-01 4.045264e-03
1.472488e-01 -4.264561e-05
1.472499e-01 -5.539547e-04
1.472537e-01 1.529455e-03
1.472579e-01 -3.066979e-03
1.472632e-01 2.967699e-03
1.472720e-01 3.977088e-03
1.472776e-01 -3.455001e-03
1.472842e-01 -1.575800e-03
1.472867e-01 -2.193160e-03
1.472870e-01 2.086268e-03
1.472874e-01 -8.539454e-04
1.472894e-01 -2.202991e-03
1.472957e-01 -4.661284e-03
1.472960e-01 1.203772e-03
1.473038e-01 1.352845e-03
1.473043e-01 2.091335e-03
1.473113e-01 -1.661316e-03
1.473126e-01 -4.242974e-05
1.473162e-01 -1.327312e-03
1.473178e-01 1.794612e-03
1.473190e-01 -5.312875e-04
1.473222e-01 8.024024e-04
1.473224e-01 -4.398232e-03
1.473241e-01 3.771972e-04
1.473412e-01 1.259339e-03
1.473482e-01 9.110290e-04
1.473532e-01 -4.856720e-04
1.473539e-01 -2.203828e-03
1.473577e-01 -4.965471e-03
1.473614e-01 6.601331e-05
1.473644e-01 -1.282374e-03
1.473659e-01 6.438111e-04
1.473759e-01 -8.065024e-04
1.473843e-01 -7.702422e-05
1.473863e-01 2.482448e-03
1.473873e-01 2.349038e-03
1.473979e-01 4.460976e-03
1.473998e-01 -3.147349e-03
1.474001e-01 1.111854e-03
1.474004e-01 -1.344187e-04
1.474023e-01 8.394714e-04
1.474098e-01 -2.680151e-03
1.474105e-01 -1.792434e-03
1.474216e-01 -2.594711e-03
1.474216e-01 1.578976e-04
1.474220e-01 3.662788e-04
1.474284e-01 4.637602e-04
1.474340e-01 -1.188031e-03
1.474346e-01 -8.598265e-04
1.474434e-01 -2.556329e-03
1.474544e-01 -1.039900e-04
1.474552e-01 -2.254544e-03
1.474581e-01 2.527462e-03
1.474610e-01 2.806430e-04
1.474622e-01 6.878605e-05
1.474660e-01 1.934285e-03
1.474716e-01 -6.642629e-04
1.474752e-01 -1.190293e-03
1.474781e-01 4.865970e-03
1.474811e-01 -1.168371e-03
1.474820e-01 -5.616653e-04
1.474866e-01 3.123127e-03
1.474924e-01 2.186055e-03
1.475008e-01 -2.019488e-03
1.475053e-01 -1.350292e-03
1.475090e-01 -2.389567e-04
1.475250e-01 -2.083524e-03
1.475255e-01 -1.004149e-03
1.475349e-01 1.000543e-03
1.475433e-01 -2.699682e-04
1.475450e-01 6.251324e-04
1.475517e-01 -1.178518e-03
1.475553e-01 -3.893302e-04
1.475571e-01 5.222395e-04
1.475616e-01 9.831300e-04
1.475657e-01 -4.850607e-03
1.475660e-01 1.161791e-03
1.475667e-01 6.540243e-04
1.475755e-01 -5.071522e-04
1.475757e-01 1.134609e-03
1.475862e-01 -9.512722e-04
1.475913e-01 5.655631e-03
1.475920e-01 9.293029e-04
1.475968e-01 1.327542e-03
1.476119e-01 -3.301029e-04
1.476155e-01 9.340821e-04
1.476222e-01 -3.233419e-03
1.476242e-01 -9.955122e-04
1.476249e-01 3.623321e-04
1.476288e-01 1.514377e-04
1.476350e-01 -7.284788e-04
1.476358e-01 -2.703390e-04
1.476391e-01 5.956809e-04
1.476397e-01 2.092641e-04
1.476416e-01 -9.077921e-04
1.476439e-01 -3.057534e-04
1.476470e-01 2.448365e-03
1.476509e-01 -1.057574e-03
1.476618e-01 -1.461831e-03
1.476626e-01 2.887979e-03
1.476664e-01 3.715801e-03
1.476694e-01 1.009518e-03
1.476770e-01 8.312550e-05
1.476820e-01 2.895776e-04
1.476824e-01 8.643655e-04
1.476847e-01 -2.152791e-04
1.476867e-01 -1.590226e-03
1.476885e-01 3.305064e-03
1.476923e-01 5.124134e-03
1.476925e-01 2.237649e-03
1.476996e-01 3.551412e-03
1.477039e-01 -9.533092e-04
1.477054e-01 2.742886e-03
1.477057e-01 -1.406356e-03
1.477098e-01 1.550570e-03
1.477201e-01 -7.850605e-04
1.477219e-01 4.031245e-05
1.477235e-01 -6.263769e-04
1.477237e-01 7.616684e-04
1.477276e-01 2.333077e-03
1.477298e-01 2.491117e-03
1.477303e-01 -7.548261e-05
1.477311e-01 1.988511e-03
1.477508e-01 6.384330e-04
1.477511e-01 8.852240e-04
1.477514e-01 5.218930e-04
1.477605e-01 1.994597e-03
1.477662e-01 -6.421085e-04
1.477671e-01 1.251616e-03
1.477671e-01 3.691624e-03
1.477698e-01 6.019670e-03
1.477777e-01 5.046194e-03
1.477790e-01 -1.853574e-03
1.477790e-01 -1.853574e-03
1.477799e-01 -7.276858e-04
1.477812e-01 -1.815233e-03
1.477813e-01 6.910465e-04
1.477843e-01 -4.480429e-04
1.477931e-01 4.457662e-03
1.477933e-01 7.714038e-03
1.477957e-01 -4.124253e-04
1.477958e-01 1.847390e-03
1.477981e-01 6.510062e-03
1.477981e-01 6.510062e-03
1.478003e-01 1.266432e-03
1.478026e-01 4.401481e-04
1.478061e-01 -5.021766e-04
1.478062e-01 1.620865e-03
1.478092e-01 -2.756296e-04
1.478095e-01 -9.649204e-04
1.478323e-01 -1.273532e-03
1.478351e-01 2.113231e-03
1.478398e-01 4.432219e-04
1.478427e-01 2.288757e-03
1.478480e-01 1.679458e-03
1.478502e-01 1.217270e-03
1.478536e-01 7.391936e-04
1.478644e-01 -2.663596e-03
1.478696e-01 -1.717458e-03
1.478696e-01 -1.717458e-03
1.478698e-01 3.764082e-04
1.478861e-01 1.437349e-03
1.478904e-01 -1.178059e-03
1.478923e-01 -1.526076e-03
1.478940e-01 1.953021e-04
1.478944e-01 1.492037e-03
1.478972e-01 2.264462e-03
1.479100e-01 -4.475049e-03
1.479105e-01 2.095542e-03
1.479138e-01 -5.657389e-04
1.479171e-01 1.533151e-03
1.479175e-01 2.043604e-03
1.479249e-01 7.457962e-05
1.479265e-01 2.244470e-03
1.479276e-01 3.687079e-03
1.479380e-01 -1.747756e-03
1.479401e-01 -1.020813e-03
1.479455e-01 -2.124579e-03
1.479458e-01 -1.067196e-02
1.479475e-01 2.517368e-03
1.479503e-01 -1.216143e-03
1.479569e-01 -1.303961e-04
1.479603e-01 7.660057e-04
1.479624e-01 3.142222e-03
1.479635e-01 2.656527e-03
1.479652e-01 -8.515811e-04
1.479671e-01 1.826029e-03
1.479891e-01 8.958801e-04
1.479912e-01 3.154475e-04
1.479918e-01 -5.593903e-03
1.479989e-01 -2.050802e-03
1.480007e-01 1.384625e-03
1.480051e-01 3.353465e-03
1.480244e-01 1.550368e-03
1.480246e-01 1.660283e-03
1.480271e-01 -5.134868e-04
1.480275e-01 3.647285e-03
1.480275e-01 3.647285e-03
1.480320e-01 6.924788e-04
1.480405e-01 2.323493e-03
1.480420e-01 -4.360192e-04
1.480429e-01 3.111136e-05
1.480475e-01 -2.744469e-04
1.480669e-01 2.044744e-03
1.481007e-01 -3.605544e-03
1.481030e-01 4.464720e-03
1.481231e-01 -1.777103e-03
1.481290e-01 1.658337e-03
1.481337e-01 -2.846393e-03
1.481384e-01 -1.061703e-03
1.481418e-01 6.758428e-03
1.481426e-01 -6.103193e-04
1.481427e-01 2.772719e-04
1.481511e-01 -1.927098e-03
1.481517e-01 1.966574e-03
1.481600e-01 -4.411546e-03
1.481650e-01 2.488857e-03
1.481670e-01 -1.573182e-03
1.481683e-01 2.310652e-05
1.481692e-01 1.679274e-03
1.481737e-01 -2.058905e-03
1.481782e-01 -2.951179e-03
1.481810e-01 -1.092245e-03
1.481854e-01 -4.467283e-04
1.481863e-01 1.187208e-04
1.481962e-01 2.324591e-03
1.481962e-01 4.988475e-03
1.482005e-01 1.495944e-03
1.482014e-01 5.336343e-04
1.482039e-01 3.686921e-04
1.482055e-01 1.550568e-03
1.482066e-01 -6.597858e-04
1.482075e-01 -2.749313e-03
1.482075e-01 -2.749313e-03
1.482123e-01 2.363615e-03
1.482152e-01 -1.717047e-03
1.482245e-01 5.305023e-03
1.482257e-01 8.576991e-04
1.482341e-01 -3.398311e-03
1.482370e-01 1.475014e-03
1.482386e-01 -2.243212e-04
1.482428e-01 1.540703e-03
1.482450e-01 3.982021e-04
1.482500e-01 1.189465e-04
1.482540e-01 1.014821e-03
1.482577e-01 3.436834e-04
1.482603e-01 -2.267847e-03
1.482607e-01 -1.901165e-04
1.482623e-01 -6.399450e-04
1.482719e-01 -1.419671e-03
1.482729e-01 1.612980e-03
1.482782e-01 -2.607058e-03
1.482818e-01 1.326177e-03
1.482880e-01 8.669996e-04
1.482913e-01 8.913975e-04
1.483007e-01 4.887247e-04
1.483139e-01 -1.964088e-03
1.483163e-01 -5.124389e-04
1.483164e-01 7.929858e-04
1.483204e-01 -1.747525e-03
1.483292e-01 1.731524e-03
1.483351e-01 -3.531255e-04
1.483488e-01 1.477849e-03
1.483603e-01 -7.027399e-04
1.483660e-01 -2.086869e-03
1.483669e-01 -1.119661e-03
1.483754e-01 2.125168e-03
1.483787e-01 -2.837169e-03
1.483811e-01 -2.899091e-03
1.483868e-01 -1.646937e-03
1.483991e-01 -1.798063e-04
1.484097e-01 -1.587327e-03
1.484155e-01 -3.873796e-03
1.484156e-01 3.438119e-04
1.484173e-01 1.275050e-04
1.484231e-01 -2.708589e-03
1.484233e-01 2.923552e-03
1.484233e-01 2.923552e-03
1.484250e-01 9.667855e-05
1.484264e-01 -2.819334e-04
1.484277e-01 1.420646e-03
1.484342e-01 1.648512e-03
1.484351e-01 -2.320276e-04
1.484378e-01 -1.423222e-03
1.484392e-01 -1.413665e-04
1.484501e-01 1.610257e-03
1.484580e-01 -1.019184e-03
1.484684e-01 7.428072e-04
1.484715e-01 -1.171555e-03
1.484862e-01 -1.207749e-03
1.484874e-01 1.053351e-03
1.484889e-01 -8.309542e-04
1.484911e-01 -1.143645e-03
1.484986e-01 -1.239445e-03
1.485021e-01 -4.273168e-04
1.485040e-01 -8.944999e-04
1.485145e-01 1.057037e-03
1.485176e-01 1.789570e-03
1.485222e-01 3.187164e-04
1.485240e-01 -2.243725e-03
1.485246e-01 1.888419e-04
1.485266e-01 -5.834546e-03
1.485302e-01 1.758697e-03
1.485420e-01 1.590930e-03
1.485542e-01 1.134286e-03
1.485552e-01 3.054565e-04
1.485596e-01 7.804686e-04
1.485627e-01 5.927160e-04
1.485685e-01 -6.684717e-04
1.485978e-01 1.643964e-03
1.485997e-01 2.877526e-03
1.486026e-01 1.040346e-04
1.486040e-01 7.811876e-03
1.486054e-01 3.984040e-03
1.486068e-01 -1.369564e-03
1.486076e-01 -1.434176e-03
1.486103e-01 6.967407e-04
1.486185e-01 1.133100e-04
1.486197e-01 -1.139338e-03
1.486236e-01 3.239405e-03
1.486324e-01 -7.597391e-04
1.486353e-01 -1.360220e-03
1.486354e-01 6.152057e-04
1.486454e-01 5.769306e-03
1.486478e-01 7.154375e-03
1.486486e-01 3.724968e-03
1.486503e-01 2.419395e-03
1.486515e-01 -2.013304e-03
1.486529e-01 -2.145455e-03
1.486556e-01 -4.461958e-04
1.486568e-01 1.977315e-03
1.486568e-01 -2.276480e-03
1.486570e-01 -6.168650e-04
1.486619e-01 7.298556e-04
1.486673e-01 -1.815399e-03
1.486673e-01 -1.815399e-03
1.486795e-01 1.977269e-03
1.486882e-01 -1.178402e-04
1.486884e-01 1.990546e-03
1.486884e-01 -2.715913e-03
1.486892e-01 -8.813949e-04
1.486975e-01 2.651982e-03
1.486975e-01 2.651982e-03
1.487015e-01 2.477700e-03
1.487021e-01 -6.444394e-04
1.487024e-01 2.553448e-03
1.487058e-01 4.044718e-03
1.487059e-01 7.613078e-05
1.487079e-01 1.248372e-04
1.487118e-01 -1.800058e-03
1.487118e-01 -1.800058e-03
1.487220e-01 2.741205e-03
1.487237e-01 -2.115275e-04
1.487271e-01 2.535746e-04
1.487281e-01 -1.115062e-03
1.487320e-01 -1.753886e-03
1.487383e-01 6.050356e-03
1.487453e-01 1.786570e-03
1.487528e-01 4.003565e-03
1.487584e-01 -1.866176e-05
1.487621e-01 -1.032548e-03
1.487621e-01 -1.032548e-03
1.487640e-01 2.164544e-05
1.487682e-01 3.405201e-03
1.487727e-01 2.440349e-03
1.487857e-01 1.462897e-03
1.487866e-01 4.053219e-03
1.487975e-01 1.224888e-03
1.488006e-01 5.671985e-04
1.488009e-01 2.192987e-03
1.488196e-01 -4.198499e-05
1.488230e-01 1.650887e-03
1.488255e-01 -2.793777e-05
1.488359e-01 5.605741e-04
1.488437e-01 4.129916e-03
1.488514e-01 1.761722e-03
1.488573e-01 -9.929899e-04
1.488590e-01 2.341312e-04
1.488696e-01 2.744373e-03
1.488696e-01 2.744373e-03
1.488722e-01 -2.402317e-03
1.488835e-01 5.357865e-03
1.488841e-01 -2.108437e-03
1.488842e-01 7.111648e-04
1.488964e-01 -1.723629e-03
1.489003e-01 -7.818453e-04
1.489042e-01 2.771995e-03
1.489042e-01 2.771995e-03
1.489174e-01 1.320564e-03
1.489239e-01 3.085554e-03
1.489298e-01 1.356596e-03
1.489365e-01 -3.209496e-03
1.489384e-01 6.251812e-04
1.489395e-01 9.738622e-03
1.489407e-01 6.632417e-04
1.489451e-01 -1.574550e-04
1.489457e-01 3.762869e-03
1.489545e-01 -1.473428e-03
1.489626e-01 -2.613353e-03
1.489727e-01 -3.755111e-03
1.489840e-01 -2.863825e-04
1.489925e-01 2.390991e-03
1.489977e-01 -1.855164e-03
1.490050e-01 -6.689548e-04
1.490057e-01 -2.353646e-03
1.490206e-01 2.590673e-03
1.490235e-01 -1.616483e-03
1.490276e-01 3.946052e-03
1.490343e-01 4.100329e-03
1.490345e-01 4.940225e-04
1.490345e-01 4.173073e-03
1.490383e-01 2.054278e-03
1.490404e-01 2.495851e-03
1.490427e-01 4.522523e-03
1.490526e-01 -3.256046e-03
1.490552e-01 2.269419e-03
1.490591e-01 7.894090e-03
1.490595e-01 1.767205e-03
1.490656e-01 1.094527e-03
1.490761e-01 7.448389e-03
1.490886e-01 6.973234e-04
1.490890e-01 4.262514e-04
1.490900e-01 2.927009e-04
1.490987e-01 3.916131e-03
1.491032e-01 2.077537e-03
1.491059e-01 -2.423370e-03
1.491061e-01 1.529892e-03
1.491165e-01 8.749347e-03
1.491180e-01 2.573830e-03
1.491203e-01 -1.015303e-03
1.491278e-01 -1.821005e-03
1.491322e-01 -1.803139e-03
1.491326e-01 1.489517e-04
1.491367e-01 -1.031002e-03
1.491371e-01 1.905407e-03
1.491441e-01 -1.227199e-03
1.491528e-01 4.445636e-04
1.491601e-01 2.816388e-03
1.491609e-01 6.256193e-04
1.491689e-01 8.455137e-04
1.491704e-01 -1.580096e-03
1.491737e-01 7.965045e-04
1.491754e-01 1.606914e-03
1.491780e-01 -2.058484e-03
1.491885e-01 -1.843217e-03
1.491911e-01 -3.011610e-03
1.491973e-01 1.979017e-03
1.492112e-01 -2.124726e-03
1.492113e-01 -2.247259e-05
1.492113e-01 -2.247259e-05
1.492343e-01 -3.979051e-04
1.492383e-01 -1.246785e-03
1.492404e-01 9.799766e-04
1.492505e-01 -2.081693e-03
1.492540e-01 1.943909e-03
1.492802e-01 -1.569402e-05
1.492816e-01 2.427042e-03
1.492835e-01 3.514884e-03
1.492849e-01 -5.105094e-04
1.492920e-01 1.380972e-03
1.493041e-01 -1.530771e-03
1.493106e-01 -1.554870e-04
1.493128e-01 1.767254e-03
1.493144e-01 -6.100441e-04
1.493178e-01 -1.905353e-03
1.493245e-01 6.682782e-06
1.493284e-01 3.498161e-03
1.493418e-01 7.545512e-03
1.493435e-01 -1.437904e-03
1.493451e-01 1.985629e-03
1.493555e-01 -2.080810e-03
1.493583e-01 -1.418946e-03
1.493584e-01 3.286960e-04
1.493667e-01 2.560357e-03
1.493712e-01 -2.013095e-03
1.493718e-01 -2.188584e-03
1.493773e-01 -4.642179e-04
1.493839e-01 -2.215024e-03
1.493839e-01 -1.713028e-03
1.493862e-01 1.461963e-03
1.493944e-01 -1.873378e-03
1.494006e-01 9.277399e-04
1.494030e-01 -1.412490e-05
1.494037e-01 2.915884e-03
1.494044e-01 -2.296664e-03
1.494044e-01 6.165795e-04
1.494123e-01 2.120861e-03
1.494131e-01 -1.887694e-03
1.494199e-01 1.112631e-03
1.494400e-01 2.676297e-03
1.494405e-01 1.224647e-03
1.494473e-01 -3.001785e-03
1.494509e-01 -1.832459e-03
1.494530e-01 1.812319e-03
1.494568e-01 1.246633e-03
1.494592e-01 6.276403e-04
1.494650e-01 4.095086e-03
1.494654e-01 -1.485499e-03
1.494781e-01 5.911465e-03
1.494788e-01 -1.108397e-03
1.494802e-01 -5.975081e-04
1.494932e-01 3.750150e-04
1.494983e-01 -9.884291e-04
1.495054e-01 3.244540e-03
1.495061e-01 -4.892450e-03
1.495069e-01 -1.480787e-03
1.495212e-01 -6.446302e-04
1.495235e-01 -1.139680e-04
1.495253e-01 1.736775e-03
1.495357e-01 -2.286932e-03
1.495387e-01 -9.115346e-04
1.495401e-01 6.756120e-04
1.495404e-01 2.776221e-03
1.495518e-01 1.552688e-03
1.495579e-01 -7.297088e-04
1.495597e-01 8.952507e-04
1.495613e-01 1.784314e-03
1.495703e-01 1.890987e-03
1.495728e-01 -5.320174e-04
1.495745e-01 2.310871e-03
1.495813e-01 -1.057608e-04
1.495820e-01 3.554903e-03
1.495839e-01 -9.150797e-04
1.495961e-01 6.090275e-04
1.495961e-01 6.090275e-04
1.495968e-01 5.321356e-04
1.495980e-01 -8.398224e-04
1.495992e-01 6.120822e-04
1.496088e-01 -8.851430e-04
1.496103e-01 -3.128224e-03
1.496103e-01 9.136378e-05
1.496103e-01 -2.453480e-03
1.496108e-01 -8.498180e-04
1.496119e-01 3.643861e-03
1.496234e-01 2.484988e-03
1.496257e-01 -4.667034e-05
1.496350e-01 5.279984e-03
1.496385e-01 -2.230876e-03
1.496386e-01 1.031711e-03
1.496397e-01 4.657410e-05
1.496418e-01 -1.554509e-03
1.496451e-01 7.996914e-04
1.496462e-01 -4.198270e-03
1.496463e-01 4.302847e-04
1.496502e-01 3.905283e-03
1.496502e-01 3.905283e-03
1.496506e-01 -1.593953e-03
1.496533e-01 -6.517925e-05
1.496558e-01 -1.716753e-04
1.496645e-01 2.387987e-05
1.496669e-01 2.258252e-03
1.496671e-01 -5.735799e-04
1.496702e-01 -3.990601e-04
1.496702e-01 -3.990601e-04
1.496777e-01 -1.544988e-03
1.496790e-01 1.281855e-03
1.496802e-01 1.121002e-03
1.496812e-01 -7.581533e-04
1.496883e-01 -2.279622e-03
1.496913e-01 1.058722e-03
1.496922e-01 1.500036e-03
1.496927e-01 -5.047139e-05
1.496930e-01 3.998921e-04
1.496973e-01 5.664667e-04
1.497026e-01 2.880169e-03
1.497049e-01 8.022242e-04
1.497067e-01 -5.240751e-04
1.497145e-01 4.933691e-03
1.497147e-01 -5.671826e-04
1.497161e-01 2.460827e-04
1.497305e-01 1.965491e-03
1.497447e-01 -8.479881e-04
1.497452e-01 -5.464970e-04
1.497458e-01 4.009930e-04
1.497568e-01 -2.632804e-03
1.497642e-01 1.430309e-03
1.497672e-01 1.399335e-03
1.497672e-01 1.399335e-03
1.497746e-01 -6.525205e-04
1.497766e-01 1.113443e-03
1.497826e-01 1.429676e-03
1.497835e-01 4.008149e-05
1.497838e-01 5.527297e-03
1.497867e-01 3.841838e-04
1.497903e-01 3.412066e-03
1.497918e-01 8.265755e-04
1.498082e-01 6.670961e-04
1.498097e-01 -7.936423e-04
1.498099e-01 -5.752013e-04
1.498106e-01 3.156753e-05
1.498117e-01 1.719450e-04
1.498160e-01 -6.970231e-04
1.498163e-01 6.336255e-04
1.498283e-01 -3.205214e-03
1.498303e-01 -8.640430e-04
1.498371e-01 4.088835e-04
1.498372e-01 1.912351e-03
1.498439e-01 1.524917e-03
1.498452e-01 4.620914e-04
1.498666e-01 2.596653e-04
1.498747e-01 9.741065e-04
1.498763e-01 -2.734912e-03
1.498785e-01 -1.214750e-03
1.498813e-01 1.124923e-03
1.498819e-01 2.122551e-04
1.498855e-01 1.288777e-03
1.498889e-01 1.107754e-03
1.498915e-01 3.365932e-04
1.498934e-01 -2.097226e-03
1.499007e-01 1.989642e-03
1.499008e-01 -2.508667e-03
1.499056e-01 -1.592139e-03
1.499127e-01 6.924495e-04
1.499247e-01 2.827869e-03
1.499255e-01 -2.725028e-03
1.499258e-01 2.939401e-03
1.499297e-01 1.046795e-03
1.499320e-01 5.334930e-03
1.499527e-01 1.133417e-03
1.499543e-01 -2.980115e-03
1.499556e-01 9.603401e-04
1.499577e-01 5.550889e-04
1.499599e-01 2.606230e-04
1.499607e-01 -5.963805e-04
1.499645e-01 -3.869416e-05
1.499690e-01 -1.961041e-04
1.499746e-01 2.461975e-03
1.499760e-01 -1.475337e-03
1.499766e-01 -1.487440e-03
1.499777e-01 5.134413e-04
1.499788e-01 6.813420e-05
1.499792e-01 -4.328527e-03
1.499863e-01 1.342498e-03
1.499879e-01 2.271023e-03
1.500016e-01 8.543071e-04
1.500091e-01 1.060818e-03
1.500117e-01 -3.929542e-03
1.500173e-01 -2.902378e-03
1.500216e-01 6.455776e-04
1.500233e-01 2.786117e-03
1.500272e-01 -1.068623e-03
1.500398e-01 -3.435659e-03
1.500409e-01 1.364647e-03
1.500424e-01 -2.706876e-03
1.500454e-01 4.836261e-04
1.500463e-01 -1.418414e-03
1.500489e-01 2.952647e-04
1.500514e-01 4.684330e-04
1.500521e-01 5.263265e-04
1.500531e-01 2.158782e-03
1.500541e-01 -1.661595e-03
1.500616e-01 -1.855909e-03
1.500696e-01 -1.577648e-03
1.500861e-01 2.828497e-04
1.500864e-01 1.135279e-02
1.500985e-01 -9.347688e-04
1.501011e-01 7.561398e-04
1.501026e-01 -4.619807e-03
1.501113e-01 -2.787957e-03
1.501155e-01 8.338326e-04
1.501223e-01 2.252605e-03
1.501252e-01 2.029758e-03
1.501316e-01 -6.042405e-04
1.501322e-01 1.359822e-03
1.501372e-01 1.055732e-03
1.501463e-01 1.540407e-03
1.501532e-01 -1.505166e-03
1.501600e-01 -1.375388e-03
1.501637e-01 -2.757907e-03
1.501659e-01 1.183819e-03
1.501671e-01 4.940169e-03
1.501709e-01 1.505014e-03
1.501814e-01 -3.351006e-03
1.501847e-01 -2.140086e-04
1.501875e-01 7.123261e-04
1.501911e-01 2.547390e-03
1.501932e-01 -2.056660e-03
1.501970e-01 -1.199239e-04
1.502076e-01 9.541696e-04
1.502169e-01 -1.898666e-04
1.502221e-01 -5.188472e-04
1.502271e-01 -7.567606e-04
1.502294e-01 -1.980136e-03
1.502353e-01 2.509588e-03
1.502412e-01 -2.566069e-03
1.502564e-01 3.450079e-04
1.502599e-01 9.637100e-04
1.502631e-01 7.710126e-04
1.502648e-01 -1.720275e-03
1.502666e-01 5.215681e-03
1.502711e-01 4.063604e-03
1.502720e-01 -2.226695e-03
1.502731e-01 1.065430e-03
1.502738e-01 -1.075237e-03
1.502754e-01 -1.834654e-04
1.502767e-01 -4.223619e-04
1.502800e-01 -1.252554e-03
1.502820e-01 2.753476e-03
1.502832e-01 3.126796e-03
1.502863e-01 -1.124550e-03
1.502897e-01 1.393466e-04
1.502931e-01 -8.366398e-04
1.503038e-01 -5.889990e-04
1.503042e-01 5.127376e-05
1.503064e-01 -5.449100e-04
1.503083e-01 5.800598e-04
1.503095e-01 1.497752e-03
1.503160e-01 4.390015e-03
1.503169e-01 3.381411e-03
1.503175e-01 -2.051164e-03
1.503367e-01 -3.674517e-03
1.503410e-01 -1.757250e-03
1.503439e-01 1.538404e-03
1.503451e-01 1.217265e-03
1.503451e-01 -4.725639e-04
1.503479e-01 -4.395363e-03
1.503684e-01 5.563591e-03
1.503741e-01 -1.261285e-03
1.503772e-01 -2.401351e-03
1.503777e-01 -3.507122e-03
1.503850e-01 -1.794205e-03
1.503890e-01 1.272098e-03
1.503917e-01 7.628427e-04
1.503950e-01 1.247402e-03
1.503951e-01 -1.671584e-04
1.504003e-01 1.319145e-03
1.504041e-01 1.524290e-03
1.504097e-01 4.204358e-03
1.504123e-01 8.378290e-04
1.504156e-01 -2.555027e-03
1.504179e-01 1.792862e-03
1.504282e-01 1.616366e-03
1.504312e-01 -4.514719e-03
1.504415e-01 -2.774792e-04
1.504486e-01 -4.510261e-03
1.504526e-01 -1.164231e-03
1.504575e-01 -1.896115e-03
1.504582e-01 7.095846e-04
1.504619e-01 1.633495e-03
1.504628e-01 3.616544e-03
1.504695e-01 4.922269e-03
1.504707e-01 -8.204303e-04
1.504775e-01 -1.229811e-03
1.504790e-01 3.699363e-06
1.504790e-01 -5.199843e-03
1.504790e-01 -5.199843e-03
1.504901e-01 4.566487e-04
1.504958e-01 -1.543864e-03
1.504962e-01 8.511653e-04
1.504987e-01 -1.568022e-03
1.505069e-01 -5.578295e-04
1.505069e-01 4.568101e-03
1.505104e-01 -1.891118e-03
1.505150e-01 -3.279294e-04
1.505215e-01 3.205413e-03
1.505245e-01 4.800285e-03
1.505245e-01 4.800285e-03
1.505250e-01 3.938525e-04
1.505264e-01 1.420932e-03
1.505331e-01 -9.498017e-04
1.505341e-01 -2.892490e-03
1.505365e-01 4.221507e-03
1.505402e-01 -1.335267e-03
1.505448e-01 1.778671e-03
1.505501e-01 5.950291e-04
1.505574e-01 5.347977e-03
1.505599e-01 -2.644245e-04
1.505603e-01 3.321403e-03
1.505621e-01 -7.763993e-04
1.505689e-01 9.096153e-04
1.505756e-01 -2.821245e-04
1.505793e-01 4.746881e-04
1.505801e-01 -4.136545e-04
1.505806e-01 1.104508e-03
1.505886e-01 -1.653337e-03
1.505961e-01 -6.503245e-04
1.505973e-01 1.244680e-03
1.506072e-01 4.268640e-03
1.506153e-01 7.754005e-03
1.506172e-01 -1.718115e-03
1.506219e-01 -8.490214e-04
1.506221e-01 5.569204e-04
1.506223e-01 1.580854e-03
1.506281e-01 -5.188432e-04
1.506349e-01 -7.871104e-04
1.506407e-01 -1.971989e-04
1.506418e-01 3.527359e-03
1.506430e-01 1.855988e-04
1.506431e-01 1.062214e-03
1.506451e-01 -1.715349e-03
1.506484e-01 3.873922e-03
1.506537e-01 -3.242812e-03
1.506612e-01 4.527605e-03
1.506646e-01 -8.977590e-04
1.506652e-01 -1.552564e-03
1.506664e-01 -1.414638e-03
1.506744e-01 -1.235447e-03
1.506780e-01 6.265169e-05
1.506817e-01 -1.704562e-03
1.506830e-01 2.252329e-03
1.506841e-01 3.883566e-03
1.506918e-01 -2.382587e-03
1.506990e-01 -6.575815e-04
1.506994e-01 -3.505940e-03
1.507047e-01 1.720275e-03
1.507056e-01 3.357606e-03
1.507087e-01 -8.173363e-03
1.507121e-01 1.443302e-03
1.507252e-01 2.989809e-03
1.507255e-01 9.587847e-04
1.507364e-01 -9.251027e-04
1.507369e-01 2.783522e-03
1.507439e-01 -1.855681e-03
1.507445e-01 -2.282382e-03
1.507455e-01 1.670885e-03
1.507516e-01 -1.750636e-03
1.507519e-01 7.996232e-04
1.507593e-01 -1.481427e-03
1.507595e-01 6.865532e-04
1.507763e-01 1.587487e-03
1.507823e-01 2.655708e-04
1.507928e-01 1.203028e-03
1.507947e-01 -1.746348e-03
1.507982e-01 6.957400e-04
1.507998e-01 4.506238e-03
1.507998e-01 4.506238e-03
1.508014e-01 9.202580e-04
1.508025e-01 3.652176e-03
1.508076e-01 -4.510025e-03
1.508146e-01 2.473590e-03
1.508167e-01 3.899551e-03
1.508204e-01 -2.202995e-03
1.508427e-01 -1.329609e-03
1.508537e-01 -2.532892e-03
1.508566e-01 1.787018e-03
1.508621e-01 -2.009773e-03
1.508693e-01 -2.764216e-03
1.508709e-01 -6.248113e-04
1.508751e-01 -7.581568e-04
1.508774e-01 8.687176e-04
1.508818e-01 -1.380093e-03
1.508828e-01 -2.227240e-03
1.508831e-01 5.743738e-04
1.508862e-01 1.156077e-03
1.508876e-01 -8.879740e-04
1.509039e-01 -1.119132e-03
1.509056e-01 1.959930e-03
1.509099e-01 -1.195512e-03
1.509132e-01 5.336114e-03
1.509345e-01 -7.393177e-04
1.509401e-01 4.929855e-04
1.509403e-01 4.200325e-03
1.509412e-01 3.714814e-03
1.509442e-01 4.045491e-03
1.509516e-01 -1.740297e-03
1.509529e-01 -8.865855e-05
1.509564e-01 8.151358e-04
1.509564e-01 8.151358e-04
1.509578e-01 3.094709e-03
1.509624e-01 -3.153075e-04
1.509625e-01 -7.499759e-04
1.509674e-01 5.533325e-04
1.509695e-01 2.704734e-03
1.509791e-01 -8.874739e-04
1.509814e-01 7.790157e-04
1.509844e-01 1.088212e-03
1.509930e-01 -2.975160e-03
1.509934e-01 -1.305368e-04
1.509999e-01 -2.543459e-03
1.509999e-01 -2.543459e-03
1.510097e-01 4.315880e-03
1.510177e-01 -4.895564e-04
1.510271e-01 -1.095325e-04
1.510272e-01 -2.710790e-03
1.510323e-01 1.305886e-03
1.510378e-01 3.110831e-04
1.510472e-01 2.901809e-04
1.510474e-01 1.006550e-03
1.510570e-01 1.072946e-04
1.510581e-01 2.479795e-03
1.510650e-01 5.690710e-03
1.510674e-01 -9.627127e-04
1.510798e-01 3.903240e-04
1.510820e-01 -1.004590e-03
1.510837e-01 -4.582609e-06
1.510919e-01 -1.212178e-03
1.510957e-01 1.030929e-03
1.511135e-01 -5.444110e-04
1.511152e-01 -2.835304e-03
1.511156e-01 3.906620e-03
1.511158e-01 4.238251e-04
1.511333e-01 -1.698123e-03
1.511333e-01 -1.698123e-03
1.511419e-01 3.421558e-03
1.511479e-01 9.058926e-04
1.511513e-01 -3.704499e-04
1.511527e-01 1.485230e-03
1.511614e-01 8.570242e-04
1.511616e-01 1.222241e-03
1.511724e-01 8.660202e-04
1.511724e-01 8.660202e-04
1.511811e-01 -6.276727e-04
1.511888e-01 3.167220e-03
1.511912e-01 -2.089693e-03
1.511957e-01 -8.048292e-04
1.511957e-01 -4.384279e-04
1.511972e-01 7.643129e-03
1.512000e-01 1.084142e-03
1.512008e-01 8.917317e-04
1.512103e-01 1.973629e-05
1.512222e-01 -2.485774e-03
1.512253e-01 1.265154e-04
1.512257e-01 -9.842537e-04
1.512340e-01 9.893541e-04
1.512403e-01 4.436495e-04
1.512443e-01 -9.239686e-04
1.512477e-01 4.483273e-03
1.512504e-01 1.048032e-03
1.512535e-01 -4.006529e-04
1.512555e-01 -4.347741e-04
1.512621e-01 -2.472763e-03
1.512670e-01 -8.446322e-04
1.512701e-01 -1.904961e-03
1.512706e-01 -3.504761e-03
1.512754e-01 -8.137089e-05
1.512774e-01 1.124349e-03
1.512795e-01 3.463507e-03
1.512819e-01 5.905959e-04
1.512981e-01 3.627305e-03
1.513024e-01 3.442982e-03
1.513031e-01 -2.062177e-03
1.513048e-01 -1.445366e-03
1.513089e-01 -4.131815e-04
1.513194e-01 2.830639e-03
1.513266e-01 7.026771e-04
1.513369e-01 1.800834e-03
1.513439e-01 -1.257857e-03
1.513567e-01 5.034181e-03
1.513580e-01 -1.376915e-03
1.513609e-01 -8.944293e-04
1.513673e-01 -2.588916e-03
1.513686e-01 -3.271373e-03
1.513746e-01 4.741972e-04
1.513793e-01 4.440757e-03
1.513958e-01 2.021351e-03
1.514035e-01 -1.181839e-03
1.514082e-01 -3.500639e-04
1.514098e-01 4.892062e-03
1.514136e-01 -9.879003e-04
1.514177e-01 3.106369e-03
1.514214e-01 2.441481e-03
1.514237e-01 1.304624e-03
1.514327e-01 -2.242840e-03
1.514474e-01 8.556245e-04
1.514488e-01 1.082537e-03
1.514499e-01 1.408212e-03
1.514533e-01 1.538149e-03
1.514587e-01 1.046820e-03
1.514587e-01 3.035039e-03
1.514670e-01 -3.257014e-03
1.514676e-01 3.099906e-03
1.514791e-01 3.104725e-03
1.514837e-01 -1.317533e-03
1.514839e-01 2.936663e-03
1.514938e-01 -2.789324e-03
1.514972e-01 6.076808e-04
1.515026e-01 8.657726e-04
1.515077e-01 -2.743965e-05
1.515088e-01 -3.085413e-04
1.515190e-01 -8.676297e-04
1.515233e-01 -1.480306e-03
1.515270e-01 -2.843419e-03
1.515287e-01 -1.742543e-04
1.515292e-01 2.717766e-03
1.515297e-01 2.083963e-03
1.515314e-01 -5.378214e-04
1.515422e-01 -4.865823e-04
1.515455e-01 4.962868e-04
1.515587e-01 1.701952e-03
1.515612e-01 1.898020e-04
1.515643e-01 6.004563e-03
1.515645e-01 -3.881885e-04
1.515666e-01 6.701809e-03
1.515681e-01 1.548770e-04
1.515785e-01 2.330065e-04
1.515819e-01 -2.226787e-04
1.515952e-01 -3.893831e-03
1.516011e-01 2.275710e-03
1.516038e-01 3.882670e-03
1.516087e-01 4.629386e-04
1.516094e-01 1.000133e-03
1.516147e-01 1.679367e-04
1.516199e-01 1.143680e-03
1.516205e-01 -5.030124e-04
1.516230e-01 -2.126213e-03
1.516230e-01 -2.126213e-03
1.516234e-01 -8.279432e-04
1.516508e-01 -2.584254e-03
1.516534e-01 -4.151608e-03
1.516555e-01 1.375316e-03
1.516577e-01 -7.754984e-04
1.516640e-01 -3.266815e-04
1.516682e-01 -1.147665e-04
1.516768e-01 8.689619e-03
1.516884e-01 -2.253929e-04
1.516957e-01 -1.782138e-03
1.517032e-01 -1.793422e-03
1.517067e-01 5.291140e-03
1.517076e-01 -2.527955e-03
1.517079e-01 -4.299547e-03
1.517113e-01 -2.235301e-03
1.517124e-01 4.824444e-03
1.517182e-01 -1.758218e-03
1.517208e-01 3.128141e-03
1.517255e-01 3.675535e-03
1.517262e-01 -9.269146e-05
1.517280e-01 -6.707507e-04
1.517364e-01 1.612880e-04
1.517423e-01 1.101190e-03
1.517428e-01 -1.152289e-03
1.517590e-01 3.233107e-03
1.517633e-01 -7.620077e-04
1.517772e-01 1.311368e-03
1.517789e-01 1.199755e-03
1.517847e-01 2.261791e-03
1.517864e-01 -6.283937e-04
1.517881e-01 6.766918e-04
1.517990e-01 3.389997e-03
1.517996e-01 -2.414417e-03
1.518032e-01 9.725577e-04
1.518082e-01 1.841772e-03
1.518124e-01 2.215825e-03
1.518185e-01 2.051805e-03
1.518240e-01 -1.394644e-03
1.518334e-01 4.451267e-04
1.518370e-01 -3.805934e-04
1.518437e-01 1.288605e-05
1.518455e-01 4.869022e-03
1.518489e-01 -8.945215e-04
1.518505e-01 -1.759813e-03
1.518510e-01 -6.445677e-04
1.518635e-01 -1.498208e-03
1.518680e-01 3.472334e-04
1.518682e-01 4.227429e-03
1.518764e-01 1.972777e-03
1.518769e-01 -7.992257e-04
1.518808e-01 -1.177618e-03
1.518815e-01 -1.047459e-04
1.518907e-01 1.471638e-03
1.518937e-01 2.233430e-04
1.519001e-01 3.773984e-03
1.519003e-01 1.824256e-04
1.519023e-01 -2.240660e-03
1.519031e-01 7.858510e-04
1.519034e-01 7.449001e-04
1.519063e-01 1.105294e-03
1.519088e-01 -1.094061e-03
1.519122e-01 4.061734e-04
1.519188e-01 -1.578922e-03
1.519222e-01 1.924064e-03
1.519408e-01 1.442814e-04
1.519464e-01 2.191494e-03
1.519612e-01 -7.252462e-04
1.519664e-01 2.259061e-03
1.519775e-01 2.164690e-03
1.519780e-01 -1.413475e-03
1.519855e-01 5.373803e-03
1.519869e-01 -1.641883e-04
1.519918e-01 -4.593575e-04
1.519941e-01 2.043522e-03
1.519966e-01 1.335727e-03
1.520044e-01 6.588391e-04
1.520098e-01 -1.787761e-03
1.520101e-01 -2.406622e-03
1.520127e-01 2.528584e-03
1.520160e-01 -1.257551e-03
1.520170e-01 4.327205e-03
1.520555e-01 -7.610109e-04
1.520577e-01 -4.859718e-04
1.520701e-01 1.347842e-03
1.520757e-01 1.648301e-03
1.520837e-01 2.718941e-03
1.520849e-01 2.509998e-03
1.520865e-01 -2.893779e-03
1.520925e-01 2.392823e-04
1.521025e-01 6.504826e-06
1.521077e-01 -2.750315e-03
1.521102e-01 4.041600e-03
1.521104e-01 -2.419830e-03
1.521133e-01 -3.312340e-03
1.521139e-01 5.329127e-04
1.521202e-01 -1.049411e-03
1.521210e-01 -3.280822e-03
1.521266e-01 1.101659e-03
1.521314e-01 6.471043e-03
1.521329e-01 3.980944e-03
1.521333e-01 -2.554946e-03
1.521354e-01 -2.704825e-03
1.521471e-01 7.859694e-04
1.521480e-01 4.096197e-03
1.521505e-01 1.717286e-03
1.521519e-01 3.635870e-03
1.521570e-01 7.406703e-04
1.521642e-01 1.035067e-03
1.521732e-01 1.917198e-03
1.521737e-01 -1.756501e-05
1.521773e-01 -3.277981e-04
1.521791e-01 6.265025e-04
1.521842e-01 5.515168e-03
1.521896e-01 -2.137347e-03
1.521896e-01 -2.137347e-03
1.522019e-01 8.394498e-04
1.522036e-01 1.485486e-03
1.522092e-01 1.154947e-04
1.522143e-01 1.865751e-04
1.522148e-01 -5.360031e-03
1.522220e-01 4.540817e-04
1.522261e-01 -5.678824e-04
1.522269e-01 1.132447e-03
1.522273e-01 6.521291e-03
1.522371e-01 -4.769686e-03
1.522472e-01 -1.314527e-03
1.522555e-01 -3.165424e-03
1.522581e-01 -7.059191e-04
1.522581e-01 -7.059191e-04
1.522741e-01 7.464645e-04
1.522787e-01 5.441326e-04
1.522870e-01 8.354704e-04
1.522878e-01 -1.106634e-03
1.522915e-01 1.450130e-03
1.522927e-01 6.122008e-04
1.522941e-01 -2.026093e-03
1.522946e-01 3.423479e-03
1.523073e-01 1.551066e-03
1.523096e-01 2.153317e-03
1.523124e-01 -1.964470e-04
1.523193e-01 2.658707e-03
1.523202e-01 3.966034e-03
1.523239e-01 -1.482121e-03
1.523270e-01 -3.347426e-03
1.523299e-01 4.742093e-04
1.523326e-01 -7.335184e-04
1.523408e-01 -4.371234e-04
1.523416e-01 -1.880934e-03
1.523466e-01 1.741003e-03
1.523530e-01 -1.217960e-03
1.523703e-01 3.131290e-03
1.523772e-01 -2.069399e-03
1.523878e-01 4.107202e-03
1.523940e-01 1.118768e-04
1.523953e-01 -1.523233e-03
1.523974e-01 2.090378e-03
1.523974e-01 2.157464e-03
1.524060e-01 8.037188e-05
1.524096e-01 -8.692951e-04
1.524184e-01 1.380503e-03
1.524261e-01 3.108924e-04
1.524307e-01 3.294061e-03
1.524457e-01 1.619034e-03
1.524477e-01 7.407579e-04
1.524501e-01 8.147562e-04
1.524516e-01 1.608494e-03
1.524710e-01 -4.197464e-04
1.524791e-01 -3.532446e-04
1.524812e-01 -2.934551e-03
1.524836e-01 4.049102e-03
1.524867e-01 1.784985e-03
1.524870e-01 -1.585742e-03
1.524870e-01 -1.585742e-03
1.524897e-01 -6.658691e-05
1.524972e-01 -6.304880e-04
1.524984e-01 -3.783049e-03
1.525019e-01 2.380775e-03
1.525081e-01 -5.210481e-04
1.525405e-01 -4.555673e-04
1.525483e-01 5.867026e-04
1.525564e-01 1.286934e-03
1.525594e-01 -2.542766e-03
1.525668e-01 -4.702042e-03
1.525729e-01 2.315422e-03
1.525745e-01 1.425929e-03
1.525873e-01 -7.782918e-04
1.525897e-01 -7.888367e-05
1.526013e-01 -1.352399e-03
1.526013e-01 -1.352399e-03
1.526118e-01 3.858614e-03
1.526147e-01 4.781218e-03
1.526241e-01 -1.711585e-03
1.526303e-01 -3.195198e-05
1.526322e-01 -2.927895e-04
1.526350e-01 -1.117260e-03
1.526364e-01 -8.921373e-05
1.526424e-01 -1.087630e-03
1.526481e-01 4.995469e-04
1.526564e-01 -3.305958e-04
1.526610e-01 -7.762645e-04
1.526752e-01 6.643028e-04
1.526761e-01 3.767837e-03
1.526786e-01 2.008017e-03
1.526799e-01 -9.381839e-04
1.526801e-01 -7.214992e-04
1.526836e-01 7.283091e-04
1.526887e-01 -2.233081e-04
1.526896e-01 4.624456e-04
1.526935e-01 1.564857e-03
1.526969e-01 -4.907756e-04
1.526975e-01 6.079793e-04
1.526982e-01 -8.430276e-05
1.527062e-01 3.524606e-04
1.527062e-01 3.524606e-04
1.527204e-01 1.085533e-03
1.527309e-01 -2.230783e-03
1.527330e-01 2.173921e-03
1.527330e-01 1.684718e-03
1.527349e-01 -4.111889e-04
1.527380e-01 -1.506251e-03
1.527498e-01 4.229818e-03
1.527501e-01 1.433707e-03
1.527560e-01 -1.547688e-03
1.527586e-01 5.338660e-04
1.527589e-01 -5.551477e-04
1.527623e-01 -1.091276e-03
1.527687e-01 3.084938e-03
1.527696e-01 -2.346102e-04
1.527717e-01 1.977974e-03
1.527801e-01 -2.375031e-03
1.527834e-01 -2.286278e-03
1.527885e-01 -2.413699e-03
1.527886e-01 -1.923935e-03
1.527999e-01 -7.904909e-05
1.528019e-01 -8.339869e-04
1.528078e-01 1.808630e-03
1.528128e-01 2.335994e-04
1.528186e-01 -2.165955e-03
1.528286e-01 1.798337e-03
1.528305e-01 9.145585e-04
1.528317e-01 -5.493616e-03
1.528319e-01 -2.960101e-04
[truncated: 4,538,794 more chars]
